# Supplementary material for: Autotrophic methylotrophy with no methanol dehydrogenase (MDH) in a strain of fluorescent Pseudomonas
Source: PeerJ. 2026 Feb 2;14:e20614. doi: 10.7717/peerj.20614 (PMC12875217; doi:10.7717/peerj.20614)
Supplement: Supplemental Information 9 [file peerj-14-20614-s009.xlsx]

## Sheet: growth
	Examples of growth curves of strain P14
		0h	24h	48h	72h	96h	120h
	Glucose 10mM	0.101	0.849	1.209	1.2	1.186
	Citrate 10mM	0.122	0.31	0.719	0.718	0.706
	Ethanol 0,2%	0.096	0.261	0.355	0.723	0.762
	Methanol1 0,2%	0.111	0.12	0.153	0.254	0.407	0.453
	Formate 20mM	0.124	0.126	0.211	0.351	0.68	0.701
	parallel growth experiments of wild-type vs insertion mutant strains of Ps. P14
		Max. OD600 after 8 days incubation (on methanol 0.2%)
		Starting OD600 = 0.1
	Str. P14	0.44	0.571	0.487
	P14-mQ1A	0.099	0.087	0.101
	P14-mQ2C	0.092	0.099	0.097
	P14-mC2	0.098	0.086	0.088
	P14-mC66	0.096	0.095	0.096
	P14-SA1	0.511	0.488	0.496

## Sheet: enzyme activity
ADH specific activity in mmol DCPIP/min * mg prot
extract 1	Methanol		Ethanol				extract 2	Methanol		Ethanol				extract 3	Methanol		Ethanol
	1	101.879	1	117.613				1	76.1023	1	78.7371				1	23.1284	1	37.0746
	2	98.9657	2	113.437				2	69.6073	2	78.3082				2	24.8545	2	45.0832
	3	104.016	3	124.897				3	71.4455	3	78.3082				3	26.5805	3	53.6442
	4	110.037	4	124.8				4	75.6121	4	79.166				4	26.5805	4	59.7197
								5	74.8155	5	77.6954				5	27.3399	5	65.312
