# Supplementary material for: Autotrophic methylotrophy with no methanol dehydrogenase (MDH) in a strain of fluorescent Pseudomonas
Source: PeerJ. 2026 Feb 2;14:e20614. doi: 10.7717/peerj.20614 (PMC12875217; doi:10.7717/peerj.20614)
Supplement: Supplemental Information 10 — Raw data obtained from the proteomics analysis of methanol- or ethanol- or glucose-grown strain P14. [file peerj-14-20614-s010.xlsx]

## Sheet: Proteins
Checked	Protein FDR Confidence: Combined	Master	Accession	Description	Exp. q-value: Combined	Contaminant	Sum PEP Score	Coverage [%]	# Peptides	# Isoforms	# PSMs	# Unique Peptides	# AAs	MW [kDa]	calc. pI	Score Sequest HT: Sequest HT	# Peptides (by Search Engine): Sequest HT	# Razor Peptides	Abundance Ratio: (E) / (G)	Abundance Ratio: (E) / (M)	Abundance Ratio: (G) / (M)	Abundance Ratio Adj. P-Value: (E) / (G)	Abundance Ratio Adj. P-Value: (E) / (M)	Abundance Ratio Adj. P-Value: (G) / (M)	Abundance Ratio Variability [%]: (E) / (G)	Abundance Ratio Variability [%]: (E) / (M)	Abundance Ratio Variability [%]: (G) / (M)	Abundances (Grouped): E	Abundances (Grouped): G	Abundances (Grouped): M	Abundances (Grouped) CV [%]: E	Abundances (Grouped) CV [%]: G	Abundances (Grouped) CV [%]: M	Abundances (Normalized): F1: Sample, E	Abundances (Normalized): F2: Sample, G	Abundances (Normalized): F3: Sample, M	Found in Sample: F1: Sample, E	Found in Sample: F2: Sample, G	Found in Sample: F3: Sample, M	# Protein Groups	Modifications
FALSE	High	Master Protein	P14_v1_1050006	ID:109594313 rpoB| RNA polymerase subunit beta [Pseudomonas sp. P14]	0	FALSE	529.058	70	88	124	1219	88	1357	150.9	5.8	3775.23	88	0	0.912	1.325	1.467	0.990213	0.992929	0.994668	19.41	31.64	32.78	105.6	116.6	77.8				3.84143e+08	4.24229e+08	2.82936e+08	High	High	High	1
FALSE	High	Master Protein	P14_v1_1170005	ID:109594474 gdhB| NAD-specific glutamate dehydrogenase [Pseudomonas sp. P14]	0	FALSE	447.618	61	85	103	605	85	1621	182.4	5.82	1770.77	85	0	0.756	1.428	1.926	0.863477	0.978458	0.906924	21.59	33.4	45.68	99.7	134.9	65.3				9.74445e+07	1.31883e+08	6.38633e+07	High	High	High	1
FALSE	High	Master Protein	P14_v1_50074	ID:109590101 qedA| Quinoprotein ethanol dehydrogenase [Pseudomonas sp. P14]	0	FALSE	383.878	79	46	90	1634	46	631	69.1	7.01	4897.67	46	0	12.22	0.129	0.012	1.64131e-16	1.5074e-08	1.15948e-16	15.08	43.06	45.66	36.1	2.8	261				4.87724e+08	3.83455e+07	3.52392e+09	High	High	High	1
FALSE	High	Master Protein	P14_v1_1050002	ID:109594309 fusA| elongation factor G [Pseudomonas sp. P14]	0	FALSE	380.182	82	47	83	2025	41	715	78.8	5.24	5574.02	47	7	0.839	1.757	2.192	0.951676	0.869217	0.832657	13.77	30.81	30.58	107.9	131.3	60.8				5.75179e+08	6.99996e+08	3.24279e+08	High	High	High	1
FALSE	High	Master Protein	P14_v1_190030	ID:109591407 gltB| glutamate synthase subunit GltB [Pseudomonas sp. P14]	0	FALSE	372.522	58	61	82	479	61	1481	161.7	6.29	1447.92	61	0	0.721	1.909	2.666	0.75129	0.784271	0.621688	16.54	21.57	28.09	103.9	141.3	54.8				6.9958e+07	9.51243e+07	3.69097e+07	High	High	High	1
FALSE	High	Master Protein	P14_v1_1050005	ID:109594312 rpoC| RNA polymerase subunit beta' [Pseudomonas sp. P14]	0	FALSE	360.941	58	78	89	828	78	1399	154.7	7.21	2257.22	78	0	0.913	1.272	1.361	0.990517	0.999657	0.995257	17.13	22.14	27.61	105.9	113.1	80.9				3.5803e+08	3.82252e+08	2.73532e+08	High	High	High	1
FALSE	High	Master Protein	P14_v1_1110011	ID:109594402 acnB| Aconitate hydratase B [Pseudomonas sp. P14]	0	FALSE	352.922	66	50	72	1029	50	874	94.2	5.34	3161.84	50	0	2.335	7.882	3.48	0.000381658	1.794e-05	0.313425	22.86	43.3	54.43	190.6	86.7	22.7				8.4636e+08	3.85023e+08	1.00663e+08	High	High	High	1
FALSE	High	Master Protein	P14_v1_1450002	ID:109594699 purL| phosphoribosylformylglycinamide synthetase [Pseudomonas sp. P14]	0	FALSE	345.946	56	59	78	606	59	1299	140.7	5.08	1700.31	59	0	0.86	1.189	1.34	0.964843	0.98878	0.98892	13.53	24.37	30.2	98.8	115.2	86				9.91999e+07	1.15684e+08	8.63339e+07	High	High	High	1
FALSE	High	Master Protein	P14_v1_130062	ID:109591007 glucose dehydrogenase [Pseudomonas sp. P14]	0	FALSE	317.814	73	38	83	1180	38	752	81	6.02	3432.07	38	0	1.149	1.614	1.429	0.852044	0.927459	0.999424	22.78	27.22	42.07	121.2	105.8	73				4.54008e+08	3.9617e+08	2.73257e+08	High	High	High	1
FALSE	High	Master Protein	P14_v1_100092	ID:109590766 aceE| pyruvate dehydrogenase E1 component [Pseudomonas sp. P14]	0	FALSE	314.474	64	60	92	826	60	881	99.3	5.82	2180.04	60	0	0.291	1.009	3.199	2.17393e-06	0.916431	0.403838	20.76	30.89	39.85	54.4	187.5	58.1				1.55198e+08	5.35337e+08	1.6595e+08	High	High	High	1
FALSE	High	Master Protein	P14_v1_480001	ID:109592782 D-lactate dehydrogenase [Pseudomonas sp. P14]	0	FALSE	310.5	62	45	61	409	45	936	102.5	6.71	1224.94	45	0	0.975	0.564	0.56	0.984666	0.169868	0.29338	25.48	29.82	46.97	79.3	79.7	141				5.08405e+07	5.10768e+07	9.03575e+07	High	High	High	1	Met-loss [N-Term]
FALSE	High	Master Protein	P14_v1_480011	ID:109592792 dnaK| chaperone protein DnaK [Pseudomonas sp. P14]	0	FALSE	300.821	66	46	66	675	46	641	68.8	4.96	2145.99	46	0	0.9	0.964	1.004	0.984666	0.890393	0.896324	22.56	50.3	66.37	97	108.7	94.4				3.10664e+08	3.48115e+08	3.02356e+08	High	High	High	1
FALSE	High	Master Protein	P14_v1_480015	ID:109592796 carB| carbamoyl phosphate synthetase subunit beta [Pseudomonas sp. P14]	0	FALSE	293.04	58	56	65	529	56	1076	117.6	5.27	1522.48	56	0	0.915	1.703	1.961	0.990517	0.890862	0.896324	18.3	34.21	33.9	111	122.7	66.3				1.33064e+08	1.47192e+08	7.95157e+07	High	High	High	1
FALSE	High	Master Protein	P14_v1_140028	ID:109591065 yfhM| alpha2-macroglobulin [Pseudomonas sp. P14]	0	FALSE	288.918	42	59	69	289	59	1633	178.3	5.58	732.97	59	0	1.373	0.875	0.598	0.376866	0.787947	0.365313	17.31	32.6	39.81	101.7	76.2	122				2.53146e+07	1.89748e+07	3.03743e+07	High	High	High	1
FALSE	High	Master Protein	P14_v1_10357	ID:109589373 DEAD/DEAH box helicase domain-containing protein [Pseudomonas sp. P14]	0	FALSE	287.746	37	69	74	245	69	2084	232.6	6.68	650.27	69	0	1.078	0.764	0.7	0.921697	0.580627	0.546241	21.59	20.95	27.12	89.3	90.4	120.3				1.29455e+07	1.30949e+07	1.74337e+07	High	High	High	1
FALSE	High	Master Protein	P14_v1_230017	ID:109591646 arcA| Arginine deiminase [Pseudomonas sp. P14]	0	FALSE	287.206	92	38	67	1124	38	417	46.4	5.74	3428.46	38	0	0.85	1.38	1.757	0.958614	0.989781	0.944122	23.43	43.33	60.6	99.8	125.5	74.7				6.06654e+08	7.63115e+08	4.54157e+08	High	High	High	1
FALSE	High	Master Protein	P14_v1_110030	ID:109590797 clpB| chaperone protein ClpB [Pseudomonas sp. P14]	0	FALSE	280.219	72	60	66	447	57	854	94.8	5.5	1346.57	60	3	0.843	2.222	2.695	0.954962	0.535234	0.608212	17.18	37.75	41.18	113.8	139.3	46.9				1.58369e+08	1.93801e+08	6.5303e+07	High	High	High	1
FALSE	High	Master Protein	P14_v1_60042	ID:109590236 formate dehydrogenase major subunit [Pseudomonas sp. P14]	0	FALSE	276.113	68	52	61	166	49	949	104.4	6.27	525.96	52	3	1.065	0.03	0.017	0.958614	1.38203e-16	1.15948e-16	21.62	171.45	110.52	3.8	3	293.2				2.39616e+06	1.93464e+06	1.86095e+08	Peak Found	Peak Found	High	1
FALSE	High	Master Protein	P14_v1_30072	ID:109589704 atpD| ATP synthase F1 complex subunit beta [Pseudomonas sp. P14]	0	FALSE	272.575	79	30	63	972	30	458	49.3	5.01	3330.81	30	0	1.297	1.114	0.845	0.5333	0.967324	0.756853	19.76	30.16	37.07	109.6	89	101.4				3.90094e+08	3.17029e+08	3.61138e+08	High	High	High	1
FALSE	High	Master Protein	P14_v1_20223	ID:109589616 putA| fused DNA-binding transcriptional repressor/proline dehydrogenase/1-pyrroline-5-carboxylate dehydrogenase PutA [Pseudomonas sp. P14]	0	FALSE	270.367	47	56	62	292	56	1317	142.5	6.37	888.17	56	0	1.024	1.09	1.039	0.955777	0.95788	0.912542	12.86	35.27	39.84	105.6	98.3	96.1				4.29583e+07	3.99744e+07	3.90688e+07	High	High	High	1
FALSE	High	Master Protein	P14_v1_1370004	ID:109594652 nrdA| Ribonucleoside-diphosphate reductase subunit alpha [Pseudomonas sp. P14]	0	FALSE	263.707	62	49	60	400	49	959	106.9	5.97	1219.03	49	0	0.774	0.927	1.158	0.89441	0.855956	0.951177	24.35	31.35	32.59	86.6	113.8	99.6				6.27481e+07	8.24895e+07	7.21607e+07	High	High	High	1
FALSE	High	Master Protein	P14_v1_160048	ID:109591218 katG| catalase/hydroperoxidase HPI [Pseudomonas sp. P14]	0	FALSE	260.58	78	47	56	700	47	751	82	5.99	1974.45	47	0	1.105	1	0.878	0.898103	0.912131	0.794806	24.59	21.2	28.19	103.2	93	103.9				2.10042e+08	1.89245e+08	2.1145e+08	High	High	High	1
FALSE	High	Master Protein	P14_v1_60061	ID:109590255 cbbL| Ribulose bisphosphate carboxylase large chain [Pseudomonas sp. P14]	0	FALSE	258.138	65	38	56	741	38	472	52.6	6.44	1979.87	38	0	0.237	0.01	0.026	9.86345e-09	1.38203e-16	5.11568e-15	19.27	33.45	52.98	2.3	8.4	289.4				1.51705e+07	5.63258e+07	1.94692e+09	High	High	High	1
FALSE	High	Master Protein	P14_v1_550006	ID:109593028 sucA| subunit of E1(0) component of 2-oxoglutarate dehydrogenase [Pseudomonas sp. P14]	0	FALSE	253.702	53	45	63	559	45	943	106.5	6.57	1532.17	45	0	0.999	2.504	2.201	0.973118	0.348705	0.827807	12.51	31.84	37.35	135.9	115.3	48.8				2.08027e+08	1.76529e+08	7.47744e+07	High	High	High	1
FALSE	High	Master Protein	P14_v1_170029	ID:109591270 yeaG| protein kinase YeaG [Pseudomonas sp. P14]	0	FALSE	252.259	68	39	61	666	39	640	73.8	5.99	2021.74	39	0	1.157	2.339	2.047	0.83259	0.455044	0.882953	15.13	33.74	42.37	129.8	116	54.1				3.6073e+08	3.22395e+08	1.50308e+08	High	High	High	1	Met-loss [N-Term]
FALSE	High	Master Protein	P14_v1_830005	ID:109593847 pepN| Aminopeptidase N [Pseudomonas sp. P14]	0	FALSE	249.93	57	46	56	313	46	885	99.4	5.2	892.34	46	0	0.811	1.456	1.672	0.92833	0.975244	0.960855	16.09	19.84	28	105.1	126.4	68.5				4.82253e+07	5.79884e+07	3.14203e+07	High	High	High	1	Met-loss [N-Term]
FALSE	High	Master Protein	P14_v1_940009	ID:109594116 ppc| phosphoenolpyruvate carboxylase [Pseudomonas sp. P14]	0	FALSE	249.142	62	52	58	246	52	875	96.9	6.67	699.74	52	0	1.415	1.493	1.017	0.308646	0.964781	0.898089	18.01	35.39	43.39	132.4	86.8	80.8				2.80809e+07	1.84247e+07	1.7138e+07	High	High	High	1
FALSE	High	Master Protein	P14_v1_740018	ID:109593607 valS| valine--tRNA ligase [Pseudomonas sp. P14]	0	FALSE	246.353	51	50	57	434	50	948	107.4	5.48	1197.96	50	0	0.844	1.15	1.33	0.95534	0.976559	0.986275	21.52	34.45	46.37	99.4	117.7	82.9				8.02552e+07	9.5057e+07	6.69414e+07	High	High	High	1
FALSE	High	Master Protein	P14_v1_1170008	ID:109594477 ppsA| phosphoenolpyruvate synthetase [Pseudomonas sp. P14]	0	FALSE	246.202	57	42	62	620	42	791	85.9	5.16	1397.21	42	0	0.887	1.496	1.716	0.984666	0.964781	0.950991	14.9	31.19	41.11	106.4	123.2	70.4				1.20556e+08	1.39631e+08	7.974e+07	High	High	High	1
FALSE	High	Master Protein	P14_v1_60059	ID:109590253 tktB| transketolase 2 [Pseudomonas sp. P14]	0	FALSE	236.193	72	35	49	281	35	686	74.5	6	776.96	35	0	0.642	0.01	0.01	0.304981	1.38203e-16	1.15948e-16	19.8	76.43	128.17	0.3	0.5	299.1				582289	905059	5.03758e+08	Peak Found	High	High	1
FALSE	High	Master Protein	P14_v1_230044	ID:109591673 leuA| 2-isopropylmalate synthase [Pseudomonas sp. P14]	0	FALSE	235.381	75	33	51	411	33	557	61.7	5.44	1293.52	33	0	0.895	0.654	0.747	0.984666	0.334977	0.626216	13.77	24.49	29.76	79.9	90.2	129.9				7.7884e+07	8.79684e+07	1.26597e+08	High	High	High	1
FALSE	High	Master Protein	P14_v1_1140007	ID:109594441 groL| chaperonin GroEL [Pseudomonas sp. P14]	0	FALSE	234.986	63	30	56	1014	30	546	56.7	5.06	2971.26	30	0	0.817	1.12	1.37	0.937737	0.969306	0.996963	22.47	28.71	36.42	94.5	119.5	86				5.90891e+08	7.47684e+08	5.37781e+08	High	High	High	1
FALSE	High	Master Protein	P14_v1_480027	ID:109592808 infB| translation initiation factor IF-2 [Pseudomonas sp. P14]	0	FALSE	233.066	65	42	54	504	42	846	91.4	6.84	1442.21	42	0	0.773	1.43	1.811	0.894017	0.977723	0.933525	16.96	45.76	36.7	100.8	129.2	70				9.61124e+07	1.23236e+08	6.6807e+07	High	High	High	1
FALSE	High	Master Protein	P14_v1_480032	ID:109592813 pnp| polynucleotide phosphorylase [Pseudomonas sp. P14]	0	FALSE	231.61	68	35	45	661	35	701	74.9	5.22	1834.06	35	0	0.731	1.332	1.64	0.788283	0.991307	0.970101	12.01	30.07	34.17	93.7	128	78.3				1.33931e+08	1.83057e+08	1.11978e+08	High	High	High	1
FALSE	High	Master Protein	P14_v1_1310008	ID:109594607 fusA| elongation factor G [Pseudomonas sp. P14]	0	FALSE	230.271	70	41	57	462	35	703	77.8	5.39	1309.17	41	0	1.197	0.981	0.799	0.756253	0.901804	0.703221	11.84	31.03	24.7	107.5	88.6	103.9				3.05379e+07	2.5186e+07	2.9528e+07	High	High	High	1
FALSE	High	Master Protein	P14_v1_30001	ID:109589633 pycB| Pyruvate carboxylase subunit B [Pseudomonas sp. P14]	0	FALSE	229.925	67	32	61	626	32	602	65.6	5.62	1646.71	32	0	0.513	1.733	3.623	0.0603995	0.878344	0.270714	19.85	18.75	29.99	85.7	165.8	48.5				1.63527e+08	3.16391e+08	9.25902e+07	High	High	High	1
FALSE	High	Master Protein	P14_v1_110042	ID:109590809 DEAD/DEAH box helicase [Pseudomonas sp. P14]	0	FALSE	229.782	69	50	56	253	50	878	96.2	6.58	702.7	50	0	0.776	0.872	1.093	0.895216	0.787916	0.93347	18.33	33.06	32.34	86.1	107.7	106.3				1.70298e+07	2.13077e+07	2.10297e+07	High	High	High	1
FALSE	High	Master Protein	P14_v1_140055	ID:109591092 aldB| aldehyde dehydrogenase B [Pseudomonas sp. P14]	0	FALSE	229.668	72	27	53	777	19	506	55.2	6	2536.94	27	11	1.721	1.705	1.057	0.0469824	0.890785	0.924767	25.89	44.52	72.25	135.3	60.8	103.9				8.66003e+08	3.89513e+08	6.65017e+08	High	High	High	1
FALSE	High	Master Protein	P14_v1_650016	ID:109593359 DUF1329 domain-containing protein [Pseudomonas sp. P14]	0	FALSE	228.015	70	29	55	701	29	454	50.5	9.17	1953.67	29	0	1.1	0.764	0.678	0.900845	0.579877	0.507678	15.58	26.52	27.14	95.3	83.4	121.3				2.36586e+08	2.06895e+08	3.00923e+08	High	High	High	1
FALSE	High	Master Protein	P14_v1_230033	ID:109591662 putative sugar-binding periplasmic protein [Pseudomonas sp. P14]	0	FALSE	227.56	82	34	60	864	34	428	45.5	6.06	2318.78	34	0	0.534	0.283	0.512	0.093405	0.00063535	0.208812	18.75	40.29	32.76	46.4	87.7	165.9				2.69462e+08	5.09621e+08	9.63717e+08	High	High	High	1
FALSE	High	Master Protein	P14_v1_80104	ID:109590567 alaS| alanine--tRNA ligase/DNA-binding transcriptional repressor [Pseudomonas sp. P14]	0	FALSE	226.903	65	44	52	324	44	897	97.1	5.55	1030.08	44	0	0.753	1.224	1.491	0.855544	0.990397	0.986275	23.26	24.49	19.24	96.9	123.6	79.4				7.34578e+07	9.3715e+07	6.02031e+07	High	High	High	1
FALSE	High	Master Protein	P14_v1_220047	ID:109591611 fadE| acyl-CoA dehydrogenase [Pseudomonas sp. P14]	0	FALSE	224.263	62	38	46	287	38	815	88.7	6.58	900.71	38	0	1.356	1.041	0.721	0.413801	0.941308	0.580553	23.29	24.41	33.91	112.3	83	104.7				3.63768e+07	2.68756e+07	3.39225e+07	High	High	High	1
FALSE	High	Master Protein	P14_v1_210041	ID:109591542 lon| Lon protease [Pseudomonas sp. P14]	0	FALSE	223.679	61	47	51	299	47	798	88.7	6.06	875.65	47	0	0.883	1.337	1.471	0.984666	0.990692	0.993355	25.12	33.14	37.99	103.2	116.6	80.2				3.45635e+07	3.90301e+07	2.68586e+07	High	High	High	1
FALSE	High	Master Protein	P14_v1_930008	ID:109594094 nuoG| NADH:quinone oxidoreductase subunit G [Pseudomonas sp. P14]	0	FALSE	222.247	55	34	43	269	34	904	97.6	6.05	845.07	34	0	1.043	1.784	1.775	0.947614	0.85588	0.94143	13.1	24.24	26.83	116.6	113.5	69.9				6.78017e+07	6.60099e+07	4.06125e+07	High	High	High	1
FALSE	High	Master Protein	P14_v1_1920001	ID:109594797 elongation factor Tu [Pseudomonas sp. P14]	0	FALSE	221.586	78	22	50	1666	21	304	33.3	5.01	4614.21	22	2	0.875	1.334	1.499	0.980197	0.990692	0.986275	41.65	44.03	56.52	96	124.3	79.7				7.26202e+08	9.4005e+08	6.02949e+08	High	High	High	1
FALSE	High	Master Protein	P14_v1_110008	ID:109590775 ileS| isoleucine--tRNA ligase [Pseudomonas sp. P14]	0	FALSE	218.719	53	43	53	307	43	943	105.8	6.1	849.51	43	0	0.822	1.529	1.815	0.939444	0.953388	0.93347	19.18	32.53	33.7	105.8	126	68.2				4.94934e+07	5.89781e+07	3.19286e+07	High	High	High	1
FALSE	High	Master Protein	P14_v1_230037	ID:109591666 oprB| Porin B [Pseudomonas sp. P14]	0	FALSE	214.545	65	23	50	1115	21	447	49.6	6.01	3509.67	23	3	0.591	0.129	0.206	0.244496	1.6042e-08	0.000808331	23.95	26.22	41.66	28.3	47.6	224.1				8.2177e+07	1.37969e+08	6.49715e+08	High	High	High	1
FALSE	High	Master Protein	P14_v1_20155	ID:109589548 rnr| RNase R [Pseudomonas sp. P14]	0	FALSE	214.276	55	51	56	278	51	857	96.6	7.83	720.76	51	0	0.895	0.84	0.99	0.984666	0.743066	0.896324	26.48	37.12	32.54	95.7	103.1	101.2				3.74806e+07	4.0354e+07	3.96137e+07	High	High	High	1	Met-loss [N-Term]
FALSE	High	Master Protein	P14_v1_50155	ID:109590182 arylsulfatase [Pseudomonas sp. P14]	0	FALSE	214.002	63	27	50	633	27	521	58.2	5.86	2086.44	27	0	1.474	0.759	0.484	0.227915	0.569238	0.167814	17.27	29.37	29.69	100.8	66.8	132.4				3.40708e+08	2.25807e+08	4.47796e+08	High	High	High	1
FALSE	High	Master Protein	P14_v1_1290008	ID:109594590 glgP| glycogen phosphorylase [Pseudomonas sp. P14]	0	FALSE	212.694	54	39	45	275	39	816	91.9	6.43	771.51	39	0	1.224	0.758	0.632	0.696812	0.567101	0.420683	16.43	43.66	27.28	93.3	79.9	126.8				2.80317e+07	2.40123e+07	3.80945e+07	High	High	High	1
FALSE	High	Master Protein	P14_v1_550016	ID:109593038 htpG| chaperone protein HtpG [Pseudomonas sp. P14]	0	FALSE	211.682	69	46	50	416	46	634	71.5	5.35	1153.24	46	0	0.872	1.008	1.109	0.979569	0.916431	0.937777	24.82	56.61	44.82	96.6	115.4	88				1.00536e+08	1.20017e+08	9.15823e+07	High	High	High	1
FALSE	High	Master Protein	P14_v1_180018	ID:109591326 gap| Glyceraldehyde-3-phosphate dehydrogenase-like protein [Pseudomonas sp. P14]	0	FALSE	210.317	74	28	50	441	28	487	53	7.64	1488.88	28	0	1.08	2.538	2.239	0.919958	0.327684	0.803153	18.22	45.14	36.26	130	115.3	54.7				1.84735e+08	1.63908e+08	7.77831e+07	High	High	High	1
FALSE	High	Master Protein	P14_v1_1000016	ID:109594241 acnM| Aconitate hydratase A [Pseudomonas sp. P14]	0	FALSE	209.453	59	38	45	277	38	863	94	5.59	770.21	38	0	1.163	1.31	1.072	0.825697	0.996599	0.931428	16.77	30.58	39.37	115.9	98.1	86.1				2.74495e+07	2.3234e+07	2.03906e+07	High	High	High	1
FALSE	High	Master Protein	P14_v1_200003	ID:109591437 uvrB| excision nuclease subunit B [Pseudomonas sp. P14]	0	FALSE	207.399	67	39	48	366	39	658	74.7	5.26	1061.15	39	0	1.064	0.54	0.485	0.92833	0.133261	0.168185	15.62	31.01	32.52	78.4	75.3	146.2				5.42194e+07	5.20578e+07	1.01082e+08	High	High	High	1
FALSE	High	Master Protein	P14_v1_1480001	ID:109594710 bipA| 50S ribosomal subunit assembly factor BipA [Pseudomonas sp. P14]	0	FALSE	206.994	69	36	58	320	36	606	67.1	5.62	970.82	36	0	0.719	1.613	2.246	0.744735	0.927459	0.801783	24.09	29.44	34.76	102.4	138.4	59.2				7.5937e+07	1.02663e+08	4.38654e+07	High	High	High	1
FALSE	High	Master Protein	P14_v1_880003	ID:109593959 ydeP| putative oxidoreductase YdeP [Pseudomonas sp. P14]	0	FALSE	206.768	67	41	53	286	41	757	83.2	6.25	810	41	0	1.133	1.413	1.181	0.874695	0.981142	0.959397	12.34	18.86	28.42	118	98.2	83.8				5.09075e+07	4.23763e+07	3.61427e+07	High	High	High	1
FALSE	High	Master Protein	P14_v1_890009	ID:109593989 histidine kinase [Pseudomonas sp. P14]	0	FALSE	206.347	45	51	54	202	50	1149	128.7	5.19	539.5	51	1	1.139	1.012	0.86	0.867424	0.918265	0.775827	20.85	41.92	45.27	102.9	88.8	108.3				1.8131e+07	1.56564e+07	1.90781e+07	High	High	High	1
FALSE	High	Master Protein	P14_v1_50080	ID:109590107 aldB| aldehyde dehydrogenase B [Pseudomonas sp. P14]	0	FALSE	205.104	65	26	42	626	18	506	54.9	5.74	1988.58	26	0	37.692	0.559	0.014	1.64131e-16	0.162957	1.15948e-16	31.39	39.76	57.6	104.4	3.4	192.2				1.66313e+08	5.47894e+06	3.06101e+08	High	High	High	1
FALSE	High	Master Protein	P14_v1_590010	ID:109593159 rpsA| 30S ribosomal subunit protein S1 [Pseudomonas sp. P14]	0	FALSE	203.898	63	36	44	741	36	558	61.5	4.92	2192.13	36	0	0.842	1.509	1.792	0.954962	0.960105	0.937421	35.21	35.18	54.7	104.4	131.2	64.4				2.98732e+08	3.7539e+08	1.84364e+08	High	High	High	1	Met-loss [N-Term]
FALSE	High	Master Protein	P14_v1_680020	ID:109593457 icd| Isocitrate dehydrogenase [NADP] [Pseudomonas sp. P14]	0	FALSE	203.762	57	31	42	278	31	741	79.9	5.68	867.64	31	0	0.401	2.034	4.99	0.00164847	0.681738	0.0665236	13.31	20.26	18.63	76	189.2	34.8				5.49433e+07	1.36715e+08	2.51601e+07	High	High	High	1
FALSE	High	Master Protein	P14_v1_430006	ID:109592593 fliC| B-type flagellin [Pseudomonas sp. P14]	0	FALSE	202.676	75	24	48	1037	24	481	48.4	4.89	4047.44	24	0	0.739	2.055	2.609	0.811516	0.664387	0.648193	18.05	22.72	18.16	106.2	139.7	54.1				5.52276e+08	7.26443e+08	2.81634e+08	High	High	High	1	Met-loss [N-Term]
FALSE	High	Master Protein	P14_v1_840005	ID:109593867 glcB| malate synthase G [Pseudomonas sp. P14]	0	FALSE	202.611	58	30	51	421	30	725	78.2	5.99	1289.2	30	0	5.46	4.315	0.708	2.52738e-14	0.0112466	0.55875	25.17	33.66	32.86	207.5	38.8	53.7				2.1581e+08	4.0407e+07	5.5822e+07	High	High	High	1	Met-loss [N-Term]
FALSE	High	Master Protein	P14_v1_660022	ID:109593397 oprF| Outer membrane porin F [Pseudomonas sp. P14]	0	FALSE	201.088	71	18	40	971	18	344	37	4.89	2527.3	18	0	1.367	1.146	0.813	0.391195	0.976559	0.718294	13.76	35.48	48.84	119.9	85.4	94.7				6.99107e+08	4.98348e+08	5.52368e+08	High	High	High	1
FALSE	High	Master Protein	P14_v1_20063	ID:109589456 leuS| leucine--tRNA ligase [Pseudomonas sp. P14]	0	FALSE	199.546	58	40	49	285	40	868	96.7	5.83	788.26	40	0	0.775	1.306	1.755	0.895216	0.996599	0.944122	21.66	34.48	36.79	102.7	124.3	73				3.93477e+07	4.76552e+07	2.79755e+07	High	High	High	1
FALSE	High	Master Protein	P14_v1_590005	ID:109593154 gyrA| DNA gyrase subunit A [Pseudomonas sp. P14]	0	FALSE	197.809	53	42	52	279	42	923	102	5.03	763.61	42	0	0.779	1.35	1.696	0.895764	0.990397	0.958827	16.61	42.87	46.2	99.2	128.6	72.2				4.9958e+07	6.47952e+07	3.63673e+07	High	High	High	1
FALSE	High	Master Protein	P14_v1_180008	ID:109591316 topA| DNA topoisomerase 1 [Pseudomonas sp. P14]	0	FALSE	195.473	57	44	52	253	44	869	97.2	7.93	662.21	44	0	0.93	1.274	1.371	0.999405	0.999657	0.996963	20.53	30.53	35.54	101.1	107.3	91.6				4.33779e+07	4.60438e+07	3.93011e+07	High	High	High	1
FALSE	High	Master Protein	P14_v1_830016	ID:109593858 p-47 protein [Pseudomonas sp. P14]	0	FALSE	194.641	63	28	48	556	28	547	58.9	5.12	1733.96	28	0	1.168	2.279	1.993	0.811516	0.495466	0.896324	20.29	40.96	69.77	130.4	114.3	55.3				4.20927e+08	3.69041e+08	1.78376e+08	High	High	High	1	Acetyl [N-Term]
FALSE	High	Master Protein	P14_v1_30074	ID:109589706 atpA| ATP synthase F1 complex subunit alpha [Pseudomonas sp. P14]	0	FALSE	193.43	55	30	44	848	30	514	55.3	5.52	2349.87	30	0	1.275	1.073	0.825	0.585211	0.951383	0.733253	12.78	35.8	37.81	112.7	87.3	100				7.22678e+08	5.59771e+08	6.41332e+08	High	High	High	1
FALSE	High	Master Protein	P14_v1_400023	ID:109592488 thrS| threonine--tRNA ligase [Pseudomonas sp. P14]	0	FALSE	192.072	57	33	45	334	33	640	72.7	5.94	872.76	33	0	0.876	1.55	1.898	0.980197	0.949429	0.918725	17.88	27.72	34.63	108.1	123.3	68.5				5.36764e+07	6.12145e+07	3.40062e+07	High	High	High	1	Met-loss [N-Term]
FALSE	High	Master Protein	P14_v1_30140	ID:109589772 prlC| oligopeptidase A [Pseudomonas sp. P14]	0	FALSE	191.872	58	38	45	291	38	683	75.5	5.26	778.38	38	0	1.102	1.341	1.152	0.898103	0.990692	0.949046	15.64	32.98	52.02	112.8	97.2	90				2.84061e+07	2.44851e+07	2.26543e+07	High	High	High	1
FALSE	High	Master Protein	P14_v1_60007	ID:109590201 fdm| Formaldehyde dismutase [Pseudomonas sp. P14]	0	FALSE	190.091	79	21	41	400	21	399	42.9	6.16	1447.72	21	0	1.305	0.597	0.448	0.517187	0.22461	0.118863	22.39	28.56	40.2	89.9	68.9	141.2				1.62039e+08	1.24202e+08	2.54402e+08	High	High	High	1
FALSE	High	Master Protein	P14_v1_390005	ID:109592432 phaC| Poly(3-hydroxyalkanoate) polymerase 1 [Pseudomonas sp. P14]	0	FALSE	189.848	70	29	44	343	29	559	62.2	7.36	998.15	29	0	1.16	0.964	0.821	0.828554	0.890393	0.728233	32.19	37.51	50.81	107.6	94.3	98.1				3.20531e+07	2.80898e+07	2.92129e+07	High	High	High	1
FALSE	High	Master Protein	P14_v1_230027	ID:109591656 edd| phosphogluconate dehydratase [Pseudomonas sp. P14]	0	FALSE	189.05	63	29	42	269	29	608	65.3	6.46	721.98	29	0	0.06	0.661	13.336	1.64131e-16	0.380181	4.79232e-05	29.46	34.99	35.55	17.5	261.8	20.7				9.70326e+06	1.45288e+08	1.15025e+07	High	High	High	1
FALSE	High	Master Protein	P14_v1_580026	ID:109593147 pupB| Ferric-pyoverdine BN7/BN8 receptor [Pseudomonas sp. P14]	0	FALSE	188.67	54	34	41	256	33	808	89.3	5.3	759.4	34	1	1.11	0.568	0.482	0.895216	0.175599	0.164886	19.12	35.71	42.2	83.1	79.1	137.8				4.48157e+07	4.2657e+07	7.43125e+07	High	High	High	1
FALSE	High	Master Protein	P14_v1_860012	ID:109593923 ptsP| phosphoenolpyruvate-protein phosphotransferase PtsP [Pseudomonas sp. P14]	0	FALSE	186.815	62	42	46	197	42	759	83.3	5.6	586.26	42	0	1.056	0.994	0.989	0.939049	0.907703	0.896324	17.13	32.28	38.77	97.5	97	105.5				2.45731e+07	2.44369e+07	2.6577e+07	High	High	High	1
FALSE	High	Master Protein	P14_v1_180017	ID:109591325 mfd| transcription-repair coupling factor [Pseudomonas sp. P14]	0	FALSE	186.341	40	40	44	164	40	1141	127.3	5.83	475.78	40	0	0.835	1.204	1.521	0.929095	0.999657	0.952713	14.49	17.4	31.89	101	127.7	71.4				8.67011e+06	1.09612e+07	6.12894e+06	High	High	High	1
FALSE	High	Master Protein	P14_v1_210033	ID:109591534 glycerol transport system substrate-binding protein [Pseudomonas sp. P14]	0	FALSE	185.66	66	33	39	286	33	579	65.2	5.86	919.52	33	0	0.993	0.545	0.517	0.976239	0.13979	0.217257	15.28	34.04	37.28	75.6	76.4	148				3.56653e+07	3.60245e+07	6.97587e+07	High	High	High	1
FALSE	High	Master Protein	P14_v1_70118	ID:109590450 conserved protein of unknown function [Pseudomonas sp. P14]	0	FALSE	185.319	46	43	48	227	43	979	109.9	6.02	605.21	43	0	1.01	1.005	1.035	0.962926	0.916431	0.911741	15.82	31.1	30.25	99.8	99.9	100.3				2.29863e+07	2.3017e+07	2.31058e+07	High	High	High	1
FALSE	High	Master Protein	P14_v1_1160010	ID:109594468 secA| protein translocation ATPase [Pseudomonas sp. P14]	0	FALSE	183.724	50	39	41	200	39	911	102.8	5.82	608.17	39	0	0.808	1.115	1.412	0.92833	0.967567	0.999864	24.8	33.08	39.5	95	120.8	84.2				3.11229e+07	3.95645e+07	2.757e+07	High	High	High	1
FALSE	High	Master Protein	P14_v1_280020	ID:109591937 Outer membrane porin, OprD family [Pseudomonas sp. P14]	0	FALSE	182.477	63	23	51	348	23	444	48.4	5.73	890.41	23	0	1.968	2.454	1.172	0.0074629	0.380181	0.958887	17.09	40.34	30.89	156.2	77.3	66.5				1.35077e+08	6.68812e+07	5.74701e+07	High	High	High	1
FALSE	High	Master Protein	P14_v1_530036	ID:109592995 Fumarate hydratase class I [Pseudomonas sp. P14]	0	FALSE	182.446	60	25	43	366	25	507	54.7	5.3	1089.79	25	0	1.066	6.139	4.833	0.92833	0.000363682	0.0785084	27.35	42.36	48.53	138.3	139.1	22.6				9.22141e+07	9.27601e+07	1.50948e+07	High	High	High	1
FALSE	High	Master Protein	P14_v1_190040	ID:109591417 maeB| NADP-dependent malic enzyme [Pseudomonas sp. P14]	0	FALSE	181.575	85	28	39	312	28	422	45.1	5.24	1011.17	28	0	0.427	0.974	2.271	0.00478592	0.898842	0.790762	20.48	36.39	39.75	63.1	164.3	72.6				7.33281e+07	1.90946e+08	8.43795e+07	High	High	High	1
FALSE	High	Master Protein	P14_v1_60064	ID:109590258 nitric oxide reductase NorD protein [Pseudomonas sp. P14]	0	FALSE	179.208	54	38	40	143	38	780	87.8	5.67	374.53	38	0	0.388	0.01	0.017	0.00160043	1.38203e-16	1.15948e-16	88.17	130.14	40.32	0.7	1.7	297.6				137832	362322	6.25529e+07	High	High	High	1
FALSE	High	Master Protein	P14_v1_770001	ID:109593685 serralysin [Pseudomonas sp. P14]	0	FALSE	178.665	38	30	40	212	27	1169	120.4	4.53	653.81	30	2	1.137	0.767	0.712	0.868379	0.581124	0.567234	15.04	34.09	34.43	96.9	82.1	121				2.7946e+07	2.37017e+07	3.49082e+07	High	High	High	1
FALSE	High	Master Protein	P14_v1_80091	ID:109590554 acs| acetyl-CoA synthetase (AMP-forming) [Pseudomonas sp. P14]	0	FALSE	177.994	55	28	37	486	28	653	71.8	6.39	1365.62	28	0	9.818	2.083	0.209	1.64131e-16	0.637446	0.000911172	27.73	28.6	33.79	187.4	18.9	93.7				3.08913e+08	3.11721e+07	1.54389e+08	High	High	High	1	Met-loss [N-Term]
FALSE	High	Master Protein	P14_v1_450017	ID:109592683 gcvP| glycine decarboxylase [Pseudomonas sp. P14]	0	FALSE	177.964	39	27	35	312	26	957	103.9	6.32	865.46	27	1	1.092	1.109	1.001	0.905249	0.964781	0.896324	15.82	32.8	49.32	107.5	96.8	95.7				2.44302e+07	2.19935e+07	2.17496e+07	High	High	High	1	Met-loss [N-Term]
FALSE	High	Master Protein	P14_v1_750005	ID:109593618 isoquinoline 1-oxidoreductase subunit beta [Pseudomonas sp. P14]	0	FALSE	177.694	55	36	42	172	36	751	80.8	6.93	534.8	36	0	1.313	0.626	0.474	0.503325	0.282106	0.153079	9.23	38.95	25.87	85.5	62.6	151.8				2.21481e+07	1.62283e+07	3.93346e+07	High	High	High	1
FALSE	High	Master Protein	P14_v1_540026	ID:109593021 (1->4)-alpha-D-glucan 1-alpha-D-glucosylmutase [Pseudomonas sp. P14]	0	FALSE	176.862	52	37	40	131	37	924	103	6.48	378.01	37	0	1.378	0.697	0.469	0.372835	0.436894	0.146118	26.47	36.86	31.05	92	71.7	136.3				1.30956e+07	1.02086e+07	1.9393e+07	High	High	High	1
FALSE	High	Master Protein	P14_v1_170036	ID:109591277 lptD| LPS-assembly protein LptD [Pseudomonas sp. P14]	0	FALSE	175.557	50	38	42	170	38	935	105.9	5.15	451.43	38	0	1.16	1.041	0.855	0.834595	0.948129	0.8574	22.11	23.31	33.87	107.9	89.1	103.1				1.26698e+07	1.04616e+07	1.21058e+07	High	High	High	1
FALSE	High	Master Protein	P14_v1_30103	ID:109589735 glyS| glycine--tRNA ligase subunit beta [Pseudomonas sp. P14]	0	FALSE	173.392	63	38	42	192	38	684	75.1	5.21	609.22	38	0	0.881	1.305	1.522	0.984345	0.996599	0.985873	23.28	21.84	26.39	102.5	123.7	73.8				3.7825e+07	4.56589e+07	2.72428e+07	High	High	High	1	Met-loss [N-Term]
FALSE	High	Master Protein	P14_v1_360024	ID:109592338 aspS| aspartate--tRNA ligase [Pseudomonas sp. P14]	0	FALSE	172.744	57	33	39	345	33	591	66.5	5.48	847.66	33	0	0.87	1.286	1.542	0.976239	0.999657	0.979525	18.23	34.15	36.61	107.3	118.8	73.9				7.22255e+07	7.99865e+07	4.97754e+07	High	High	High	1
FALSE	High	Master Protein	P14_v1_220034	ID:109591598 rne| ribonuclease E [Pseudomonas sp. P14]	0	FALSE	172.297	36	29	36	227	29	1086	120.5	5.05	731.42	29	0	0.759	1.546	2.04	0.868379	0.949634	0.885242	18.12	23.33	33.55	100.8	136.1	63.1				3.79039e+07	5.11852e+07	2.3727e+07	High	High	High	1
FALSE	High	Master Protein	P14_v1_230016	ID:109591645 argF| CP4-6 prophage; ornithine carbamoyltransferase ArgF [Pseudomonas sp. P14]	0	FALSE	170.869	79	19	42	1197	19	336	37.9	6.35	3367.48	19	0	0.795	1.455	1.638	0.915388	0.975244	0.970101	20.08	28.72	34.81	104.7	122.7	72.6				6.63679e+08	7.77434e+08	4.60052e+08	High	High	High	1
FALSE	High	Master Protein	P14_v1_20001	ID:109589394 DNA phosphorothioation-dependent restriction protein DptH [Pseudomonas sp. P14]	0	FALSE	170.583	30	45	47	144	45	1851	204.1	5.34	377.07	45	0	0.894	1.041	1.156	0.95737	0.969679	0.992019	23.96	43.03	32.61	99.9	110.3	89.8				5.86121e+06	6.47161e+06	5.26825e+06	High	High	High	1
FALSE	High	Master Protein	P14_v1_1390002	ID:109594664 acnA| aconitate hydratase 1 [Pseudomonas sp. P14]	0	FALSE	170.398	49	35	38	233	35	913	99.1	5.86	666.59	35	0	0.982	1.792	1.749	0.983625	0.850148	0.944122	11.9	25.7	31.8	116.3	121.3	62.4				3.72398e+07	3.88454e+07	1.99939e+07	High	High	High	1	Met-loss [N-Term]
FALSE	High	Master Protein	P14_v1_990005	ID:109594213 excinuclease ABC subunit A [Pseudomonas sp. P14]	0	FALSE	168.7	51	40	40	179	33	883	95.9	6.76	486.19	40	7	1.062	0.208	0.187	0.929095	1.68497e-05	0.000367038	23.45	23.07	35.87	50.7	52.5	196.8				1.39569e+07	1.44497e+07	5.41389e+07	High	High	High	1
FALSE	High	Master Protein	P14_v1_60137	ID:109590331 metH| cobalamin-dependent methionine synthase [Pseudomonas sp. P14]	0	FALSE	168.039	34	35	43	177	35	1235	135.5	5.03	509.79	35	0	0.801	1.737	2.081	0.921697	0.850148	0.852893	22.29	47.27	42.03	103.8	136.7	59.5				1.39143e+07	1.83262e+07	7.98416e+06	High	High	High	1
FALSE	High	Master Protein	P14_v1_1020012	ID:109594269 ahcY| Adenosylhomocysteinase [Pseudomonas sp. P14]	0	FALSE	167.66	77	32	41	280	32	469	51.4	5.64	825.84	32	0	1.11	1.951	1.704	0.895684	0.753309	0.955294	25.54	22.42	38.51	123.5	110.3	66.2				1.32868e+08	1.18733e+08	7.12366e+07	High	High	High	1	Met-loss [N-Term]
FALSE	High	Master Protein	P14_v1_90087	ID:109590656 NADPH dehydrogenase [Pseudomonas sp. P14]	0	FALSE	167.578	86	25	30	469	25	368	40.5	5.96	1573.86	25	0	1.065	1.37	1.276	0.92833	0.989781	0.97678	16.64	39.73	31.98	111.9	104.6	83.4				9.50214e+07	8.88057e+07	7.08152e+07	High	High	High	1
FALSE	High	Master Protein	P14_v1_630011	ID:109593292 prc| Tail-specific protease [Pseudomonas sp. P14]	0	FALSE	167.322	50	33	44	330	33	704	79.1	7.05	942.26	33	0	0.961	1.104	1.04	0.984666	0.964781	0.912663	22.71	25.88	32.87	101.7	105.8	92.5				4.97438e+07	5.17375e+07	4.526e+07	High	High	High	1
FALSE	High	Master Protein	P14_v1_340001	ID:109592234 argG| Argininosuccinate synthase [Pseudomonas sp. P14]	0	FALSE	166.771	64	23	32	254	23	405	45.1	5.48	809.46	23	0	1.076	2.343	1.945	0.924574	0.455031	0.899657	20.67	44.42	32.4	120.6	115.5	63.9				8.607e+07	8.24347e+07	4.56347e+07	High	High	High	1
FALSE	High	Master Protein	P14_v1_500007	ID:109592859 ppk| Polyphosphate kinase [Pseudomonas sp. P14]	0	FALSE	166.455	58	35	38	212	35	747	83.9	7.05	573.96	35	0	0.99	0.934	0.872	0.979569	0.863723	0.788308	23.99	41.55	33.78	102.7	89.4	108				3.52271e+07	3.0655e+07	3.70418e+07	High	High	High	1	Met-loss [N-Term]
FALSE	High	Master Protein	P14_v1_440004	ID:109592632 putative exported protein [Pseudomonas sp. P14]	0	FALSE	166.41	46	34	39	145	34	978	107.2	5.95	453.54	34	0	1.073	0.838	0.758	0.92833	0.716846	0.698609	19.81	24.79	39.35	95.4	88.3	116.2				1.20411e+07	1.11457e+07	1.46679e+07	High	High	High	1
FALSE	High	Master Protein	P14_v1_870005	ID:109593939 livK| L-leucine/L-phenylalanine ABC transporter periplasmic binding protein [Pseudomonas sp. P14]	0	FALSE	165.697	72	22	34	437	22	371	39.4	6.46	1313.49	22	0	1.149	0.279	0.246	0.852044	0.000553558	0.00329286	12.54	34.41	45.52	57.9	46.9	195.3				1.87083e+08	1.51559e+08	6.31387e+08	High	High	High	1
FALSE	High	Master Protein	P14_v1_710008	ID:109593519 tsf| protein chain elongation factor EF-Ts [Pseudomonas sp. P14]	0	FALSE	165.664	78	19	40	904	19	287	30.4	5.21	3128.05	19	0	0.778	1.696	2.146	0.895216	0.896971	0.847354	15.92	51.21	45.5	102.4	133.4	64.1				3.45734e+08	4.5038e+08	2.16527e+08	High	High	High	1	Met-loss [N-Term]
FALSE	High	Master Protein	P14_v1_500004	ID:109592856 rho| transcription termination factor Rho [Pseudomonas sp. P14]	0	FALSE	165.593	66	28	34	253	28	419	47	7.94	821.19	28	0	0.904	1.088	1.188	0.985193	0.95788	0.960855	16.78	35.37	27.11	98.8	108.1	93				5.02929e+07	5.50351e+07	4.73565e+07	High	High	High	1
FALSE	High	Master Protein	P14_v1_410005	ID:109592521 maltose alpha-D-glucosyltransferase / alpha-amylase [Pseudomonas sp. P14]	0	FALSE	164.712	45	36	38	141	36	1106	125.4	5.76	401.68	36	0	1.264	0.865	0.624	0.648107	0.787947	0.553603	27.57	23.91	30.8	105.8	84.5	109.7				1.18184e+07	9.44769e+06	1.22608e+07	High	High	High	1
FALSE	High	Master Protein	P14_v1_190044	ID:109591421 argS| arginine--tRNA ligase [Pseudomonas sp. P14]	0	FALSE	163.692	59	28	32	198	28	578	63.6	5.87	626.45	28	0	0.846	1.455	1.633	0.95737	0.975244	0.971158	12.12	26.16	28.13	103.2	120.3	76.4				3.30524e+07	3.85259e+07	2.44774e+07	High	High	High	1
FALSE	High	Master Protein	P14_v1_740021	ID:109593610 pepA| aminopeptidase A/I [Pseudomonas sp. P14]	0	FALSE	163.293	65	29	36	340	29	497	52.4	7.37	1046.75	29	0	0.773	0.998	1.138	0.894017	0.907703	0.944152	20.13	34.04	65.11	94.9	113.4	91.8				7.16078e+07	8.55519e+07	6.9243e+07	High	High	High	1
FALSE	High	Master Protein	P14_v1_250048	ID:109591809 dhaS| putative aldehyde dehydrogenase DhaS [Pseudomonas sp. P14]	0	FALSE	163.212	66	19	36	179	19	497	53.3	5.91	570.91	19	0	81.517	57.309	0.645	1.64131e-16	1.38203e-16	0.687692	30.63	16.33	37.35	292.3	3	4.7				1.1703e+08	1.19778e+06	1.86769e+06	High	High	High	1
FALSE	High	Master Protein	P14_v1_930005	ID:109594091 nuoC| NADH:quinone oxidoreductase subunit CD [Pseudomonas sp. P14]	0	FALSE	163.137	62	31	38	266	31	593	67.6	6.54	722.37	31	0	1.11	2.193	1.939	0.895307	0.553963	0.902154	15.02	26.34	21.25	125.4	116.5	58.2				5.73782e+07	5.33184e+07	2.66263e+07	High	High	High	1
FALSE	High	Master Protein	P14_v1_130012	ID:109590957 pyrG| CTP synthetase [Pseudomonas sp. P14]	0	FALSE	162.879	63	26	33	248	26	542	59.4	5.95	831.9	26	0	0.884	1.065	1.196	0.984666	0.949429	0.963502	15.4	29.3	34.17	99	111.3	89.8				5.251e+07	5.90592e+07	4.76295e+07	High	High	High	1
FALSE	High	Master Protein	P14_v1_110083	ID:109590850 Lon-like ATP-dependent protease [Pseudomonas sp. P14]	0	FALSE	162.637	45	30	37	156	30	812	89.6	4.88	445.25	30	0	0.83	1.786	2.32	0.947614	0.833052	0.775787	25.38	30.18	29.39	108.5	133.4	58.1				1.77783e+07	2.18576e+07	9.51895e+06	High	High	High	1
FALSE	High	Master Protein	P14_v1_410001	ID:109592517 glgX| limit dextrin alpha-1,6-glucohydrolase [Pseudomonas sp. P14]	0	FALSE	162.453	57	33	39	185	33	717	81	5.41	534.35	33	0	1.285	0.808	0.655	0.562063	0.676725	0.467545	22.7	21.43	25.24	96.3	76.7	127				2.57577e+07	2.05014e+07	3.39772e+07	High	High	High	1
FALSE	High	Master Protein	P14_v1_100093	ID:109590767 glnE| Glutamine synthetase adenylyl-L-tyrosine phosphorylase / Glutamine synthetase adenylyl transferase [Pseudomonas sp. P14]	0	FALSE	161.022	43	32	39	132	32	977	109.4	5.59	370.96	32	0	0.984	0.939	1.077	0.990517	0.906926	0.971401	15.88	34.74	35.51	95.1	101.7	103.2				7.43363e+06	7.95134e+06	8.06301e+06	High	High	High	1
FALSE	High	Master Protein	P14_v1_80030	ID:109590493 hrpA| ATP-dependent RNA helicase HrpA [Pseudomonas sp. P14]	0	FALSE	160.815	38	43	46	135	41	1301	147	8.16	346.93	43	2	0.839	1.394	1.583	0.923639	0.975244	0.940827	19.1	29.03	37.04	94.9	105.5	99.6				7.57826e+06	8.42154e+06	7.95367e+06	High	High	High	1
FALSE	High	Master Protein	P14_v1_1360005	ID:109594648 isocitrate lyase [Pseudomonas sp. P14]	0	FALSE	159.98	78	24	39	645	24	334	36.7	5.78	2033.73	24	0	58.568	8.056	0.164	1.64131e-16	1.35841e-05	0.000118688	29.23	64.21	48.75	266.6	5.2	28.1				1.94557e+09	3.8227e+07	2.05398e+08	High	High	High	1
FALSE	High	Master Protein	P14_v1_90047	ID:109590616 gcd| Quinoprotein glucose dehydrogenase [Pseudomonas sp. P14]	0	FALSE	159.742	46	30	39	239	30	803	86.5	6.14	610.17	30	0	0.748	1.479	1.875	0.836268	0.967567	0.925174	19.34	31.59	43.92	103.1	129.2	67.6				3.58879e+07	4.49808e+07	2.35368e+07	High	High	High	1	Met-loss [N-Term]
FALSE	High	Master Protein	P14_v1_210038	ID:109591539 tig| trigger factor [Pseudomonas sp. P14]	0	FALSE	159.719	69	29	43	390	29	437	48.5	4.83	1180.4	29	0	0.792	1.775	2.373	0.907811	0.859601	0.747734	9.78	29.45	32.01	105	136.2	58.8				2.01682e+08	2.61545e+08	1.12901e+08	High	High	High	1
FALSE	High	Master Protein	P14_v1_20159	ID:109589552 methyl-accepting chemotaxis protein [Pseudomonas sp. P14]	0	FALSE	159.714	60	31	35	96	30	644	68.2	5.59	311.31	31	1	0.791	0.183	0.206	0.878629	2.91768e-06	0.000838013	24.94	43.36	28.66	57.3	62.8	180				8.71017e+06	9.54224e+06	2.73603e+07	High	High	High	1
FALSE	High	Master Protein	P14_v1_90105	ID:109590674 lysS| lysine--tRNA ligase, constitutive [Pseudomonas sp. P14]	0	FALSE	159.364	67	36	39	334	36	500	57.1	5.38	759.01	36	0	0.739	1.673	2.254	0.811516	0.905442	0.799509	15.83	31.7	41.21	102.9	132.3	64.8				5.11872e+07	6.57769e+07	3.22027e+07	High	High	High	1
FALSE	High	Master Protein	P14_v1_680016	ID:109593453 clpA| ATP-dependent Clp protease ATP-binding subunit ClpA [Pseudomonas sp. P14]	0	FALSE	159.25	55	39	43	194	39	756	83.3	5.87	536.61	39	0	1.134	1.932	1.702	0.874695	0.766472	0.95591	19.92	46.54	41.84	124.8	109.7	65.5				4.04147e+07	3.55116e+07	2.12128e+07	High	High	High	1
FALSE	High	Master Protein	P14_v1_20220	ID:109589613 carbamoyltransferase [Pseudomonas sp. P14]	0	FALSE	158.448	53	28	39	228	28	585	65.6	7.23	575.6	28	0	0.972	1.12	1.119	0.984666	0.969306	0.941256	17.91	37.49	34.23	101.3	106.7	92.1				1.70037e+07	1.79074e+07	1.54604e+07	High	High	High	1
FALSE	High	Master Protein	P14_v1_60057	ID:109590251 prkB| putative phosphoribulokinase [Pseudomonas sp. P14]	0	FALSE	157.956	70	25	39	244	25	305	34.6	6.3	699.13	25	0	0.93	0.01	0.01	0.962988	1.38203e-16	1.15948e-16	29.49	144.61	5.26	0	0	299.9				26165.7	36480.7	2.72194e+08	Peak Found	Peak Found	High	1
FALSE	High	Master Protein	P14_v1_1710002	ID:109594773 frmA| S-(hydroxymethyl)glutathione dehydrogenase [Pseudomonas sp. P14]	0	FALSE	157.917	64	20	34	577	19	369	38.9	6.4	1601.94	20	2	1.254	0.042	0.04	0.634343	1.38203e-16	4.69448e-12	14.02	41.4	31.8	13	10.8	276.2				9.78232e+07	8.09124e+07	2.07428e+09	High	High	High	1
FALSE	High	Master Protein	P14_v1_480002	ID:109592783 lldD| L-lactate dehydrogenase [Pseudomonas sp. P14]	0	FALSE	157.518	66	24	37	404	24	381	41.4	8.15	1094.41	24	0	1.224	0.657	0.523	0.695694	0.342892	0.227935	16.27	17.72	26.22	92.9	73.6	133.5				1.14892e+08	9.10275e+07	1.65152e+08	High	High	High	1
FALSE	High	Master Protein	P14_v1_240046	ID:109591730 uvrA| excision nuclease subunit A [Pseudomonas sp. P14]	0	FALSE	157.092	51	33	33	132	33	944	104.3	7.03	401.07	33	0	0.93	0.866	1.079	0.984666	0.839017	0.971401	19.18	32.67	36.67	95.2	107.4	97.4				7.59595e+06	8.56858e+06	7.77629e+06	High	High	High	1
FALSE	High	Master Protein	P14_v1_130060	ID:109591005 exported protein of unknown function [Pseudomonas sp. P14]	0	FALSE	156.926	59	21	45	371	21	446	48.3	6.05	1212.52	21	0	1.211	1.098	0.935	0.730932	0.961686	0.853657	16.69	30.5	25.07	110.9	92.6	96.5				2.14391e+08	1.79134e+08	1.86536e+08	High	High	High	1
FALSE	High	Master Protein	P14_v1_1270008	ID:109594572 fumC| fumarase C [Pseudomonas sp. P14]	0	FALSE	156.751	63	19	31	165	19	464	49.1	6.48	544.86	19	0	1.02	1.535	1.219	0.95737	0.952121	0.971401	18.32	29.95	60.97	116.1	109.5	74.4				2.47814e+07	2.33549e+07	1.58734e+07	High	High	High	1	Met-loss [N-Term]
FALSE	High	Master Protein	P14_v1_170019	ID:109591260 rpoD| RNA polymerase, sigma 70 (sigma D) factor [Pseudomonas sp. P14]	0	FALSE	156.489	53	28	35	243	26	616	69.4	5.01	701.22	28	2	0.828	1.341	1.65	0.947614	0.990692	0.966503	26.72	27.07	41.59	100.2	122.8	77.1				4.69807e+07	5.7577e+07	3.61585e+07	High	High	High	1
FALSE	High	Master Protein	P14_v1_440031	ID:109592659 ilvI| acetolactate synthase/acetohydroxybutanoate synthase, catalytic subunit [Pseudomonas sp. P14]	0	FALSE	156.451	60	28	37	341	28	574	62.7	6.84	997.29	28	0	1.162	0.751	0.657	0.826841	0.55268	0.471389	18.06	32.27	25.01	95.4	83.7	121				8.10505e+07	7.10981e+07	1.02787e+08	High	High	High	1
FALSE	High	Master Protein	P14_v1_640009	ID:109593319 ilvD| dihydroxy-acid dehydratase [Pseudomonas sp. P14]	0	FALSE	156.324	58	30	35	316	30	613	65.6	6.02	921.95	30	0	1.02	0.942	0.862	0.95737	0.872607	0.775827	14.52	33.84	31.01	99.9	93.3	106.8				7.54845e+07	7.04892e+07	8.06912e+07	High	High	High	1
FALSE	High	Master Protein	P14_v1_220012	ID:109591576 tyrB| tyrosine aminotransferase [Pseudomonas sp. P14]	0	FALSE	156.305	82	26	32	359	26	398	43.3	6.02	791.11	26	0	0.907	1.692	1.862	0.986584	0.899601	0.926846	11.78	33.38	41.05	108.6	133.1	58.3				3.59144e+07	4.40212e+07	1.92888e+07	High	High	High	1	Met-loss [N-Term]
FALSE	High	Master Protein	P14_v1_140041	ID:109591078 accC| biotin carboxylase [Pseudomonas sp. P14]	0	FALSE	156.007	73	32	39	422	31	451	49.1	6.54	1160.16	32	1	0.96	1.148	1.256	0.984666	0.976559	0.976549	24.7	31.81	37.5	99.7	116	84.4				1.04601e+08	1.21734e+08	8.85417e+07	High	High	High	1
FALSE	High	Master Protein	P14_v1_400018	ID:109592483 pheT| phenylalanine--tRNA ligase subunit beta [Pseudomonas sp. P14]	0	FALSE	155.606	50	34	39	224	34	793	86.6	5.24	602.07	34	0	0.768	1.215	1.681	0.883182	0.989781	0.959397	21.39	34.93	41.92	96.4	130.5	73				2.67797e+07	3.62511e+07	2.02806e+07	High	High	High	1
FALSE	High	Master Protein	P14_v1_140014	ID:109591051 methyl-accepting chemotaxis protein [Pseudomonas sp. P14]	0	FALSE	155.177	55	25	36	148	23	647	69.9	5.38	510.65	25	1	1.17	0.41	0.386	0.852044	0.020105	0.0567724	18.31	21.78	43.22	67.8	63.1	169.1				9.78248e+06	9.11185e+06	2.44196e+07	High	High	High	1
FALSE	High	Master Protein	P14_v1_190001	ID:109591378 glnA| glutamine synthetase [Pseudomonas sp. P14]	0	FALSE	154.929	60	23	37	452	23	468	51.7	5.4	1414.8	23	0	0.796	1.247	1.5	0.916492	0.993216	0.986275	23.15	21.45	34.54	98	123.4	78.6				2.59379e+08	3.26462e+08	2.08147e+08	High	High	High	1
FALSE	High	Master Protein	P14_v1_110074	ID:109590841 ettA| energy-dependent translational throttle protein EttA [Pseudomonas sp. P14]	0	FALSE	154.873	57	28	33	278	28	555	61.8	5.59	880.3	28	0	0.797	1.163	1.558	0.919958	0.980679	0.97678	24.88	25.76	42.24	91.3	128.4	80.4				3.53291e+07	4.96715e+07	3.10994e+07	High	High	High	1
FALSE	High	Master Protein	P14_v1_290053	ID:109592026 adhP| ethanol dehydrogenase/alcohol dehydrogenase [Pseudomonas sp. P14]	0	FALSE	154.729	85	17	33	418	17	336	35.4	5.9	1522.65	17	0	0.667	4.621	5.989	0.539688	0.00623036	0.0239674	11.04	32.85	37.04	111.3	162.7	26.1				1.29043e+08	1.88708e+08	3.02249e+07	High	High	High	1
FALSE	High	Master Protein	P14_v1_180001	ID:109591309 soluble lytic murein transglycosylase [Pseudomonas sp. P14]	0	FALSE	154.324	60	37	43	172	37	641	73.6	9.51	461.22	37	0	0.959	0.973	1.05	0.984666	0.896971	0.920827	17.09	34.79	49.25	95.7	106.9	97.3				1.50954e+07	1.68618e+07	1.53463e+07	High	High	High	1
FALSE	High	Master Protein	P14_v1_780002	ID:109593713 sulfite reductase (NADPH) hemoprotein beta-component [Pseudomonas sp. P14]	0	FALSE	154.307	68	31	37	265	31	550	62.1	5.86	708.01	31	0	0.831	1.603	1.793	0.948261	0.932747	0.937319	19.27	27.21	33.81	103.6	126.2	70.2				5.76005e+07	7.02142e+07	3.9034e+07	High	High	High	1
FALSE	High	Master Protein	P14_v1_310002	ID:109592081 glnS| glutamine--tRNA ligase [Pseudomonas sp. P14]	0	FALSE	153.771	63	33	37	231	33	567	64.6	6.11	630.56	33	0	0.777	1.23	1.485	0.895216	0.990692	0.988721	15.45	30.55	35.65	96.9	126.4	76.6				3.3172e+07	4.3265e+07	2.62296e+07	High	High	High	1	Met-loss [N-Term]
FALSE	High	Master Protein	P14_v1_220007	ID:109591571 gltX| Glutamate--tRNA ligase [Pseudomonas sp. P14]	0	FALSE	153.752	64	30	36	188	30	493	56.4	5.82	529.13	30	0	0.888	1.277	1.39	0.984666	0.999657	0.999424	17.53	26.18	33.21	103.8	118.7	77.5				2.51852e+07	2.88141e+07	1.88107e+07	High	High	High	1
FALSE	High	Master Protein	P14_v1_1330007	ID:109594624 Chromosome segregation ATPases [Pseudomonas sp. P14]	0	FALSE	153.347	50	41	43	125	41	943	106.5	5.43	324.8	41	0	1.077	0.806	0.819	0.947614	0.807311	0.884394	16.54	32.07	20.54	90.7	96.4	112.9				5.007e+06	5.32238e+06	6.22983e+06	High	High	High	1
FALSE	High	Master Protein	P14_v1_580011	ID:109593132 Electron transfer flavoprotein-ubiquinone oxidoreductase [Pseudomonas sp. P14]	0	FALSE	153.26	64	29	34	193	29	554	60.2	5.88	566.89	29	0	1.71	1.199	0.766	0.050822	0.989781	0.657234	21.59	24.59	39.37	127.1	76.6	96.3				2.65147e+07	1.59666e+07	2.00828e+07	High	High	High	1
FALSE	High	Master Protein	P14_v1_550001	ID:109593023 gltA| citrate synthase [Pseudomonas sp. P14]	0	FALSE	152.961	69	23	38	604	23	429	47.6	6.99	1622.19	23	0	2.293	3.085	1.31	0.000540507	0.126929	0.986222	20.4	46.68	46.71	179	70.8	50.2				3.25272e+08	1.28742e+08	9.12352e+07	High	High	High	1
FALSE	High	Master Protein	P14_v1_540025	ID:109593020 4-alpha-glucanotransferase [Pseudomonas sp. P14]	0	FALSE	152.865	61	31	35	201	30	689	76.4	5.64	538.74	31	1	1.325	0.673	0.509	0.482309	0.380181	0.206159	22.34	34.47	40.94	94	71	135.1				1.81619e+07	1.37099e+07	2.60954e+07	High	High	High	1
FALSE	High	Master Protein	P14_v1_440033	ID:109592661 ilvC| Ketol-acid reductoisomerase (NADP(+)) [Pseudomonas sp. P14]	0	FALSE	152.453	67	22	37	645	22	338	36.3	5.71	1971.39	22	0	0.966	0.987	1.073	0.984666	0.906926	0.932248	23.49	35.3	34.94	101	104.1	94.9				2.27917e+08	2.34844e+08	2.14221e+08	High	High	High	1
FALSE	High	Master Protein	P14_v1_30091	ID:109589723 gyrB| DNA gyrase subunit B [Pseudomonas sp. P14]	0	FALSE	152.166	44	33	37	221	33	806	90	5.94	656.78	33	0	0.719	1.567	2.136	0.745597	0.948129	0.852083	17.61	35.94	33.66	99.2	136.8	64.1				2.92528e+07	4.03466e+07	1.89043e+07	High	High	High	1	Met-loss [N-Term]
FALSE	High	Master Protein	P14_v1_650017	ID:109593360 DUF1302 domain-containing protein [Pseudomonas sp. P14]	0	FALSE	150.985	47	24	37	262	24	628	67.9	5.3	797.42	24	0	1.875	0.579	0.291	0.0151721	0.191131	0.0105709	19.11	39.03	33.28	90.3	49.3	160.5				7.9044e+07	4.31247e+07	1.40485e+08	High	High	High	1
FALSE	High	Master Protein	P14_v1_130057	ID:109591002 relA| GDP/GTP pyrophosphokinase [Pseudomonas sp. P14]	0	FALSE	150.976	51	35	36	144	35	746	83.5	7.65	416.73	35	0	0.826	0.843	1.019	0.947614	0.753309	0.919601	11.41	33.06	32.69	90.9	112.1	97				1.17709e+07	1.45247e+07	1.25649e+07	High	High	High	1
FALSE	High	Master Protein	P14_v1_90075	ID:109590644 thrC| Threonine synthase [Pseudomonas sp. P14]	0	FALSE	150.548	83	27	30	269	27	469	51.6	6.28	802.49	27	0	0.822	1.338	1.551	0.940981	0.990692	0.977897	22.45	44.78	47.16	108	121.6	70.3				4.37056e+07	4.92109e+07	2.84617e+07	High	High	High	1
FALSE	High	Master Protein	P14_v1_30169	ID:109589801 polA| DNA polymerase I [Pseudomonas sp. P14]	0	FALSE	150.415	49	38	38	170	38	932	101.4	5.4	464.99	38	0	0.901	1.196	1.349	0.984666	0.989781	0.992695	19.14	22.74	23.5	97.9	117.6	84.5				1.81856e+07	2.18549e+07	1.5691e+07	High	High	High	1
FALSE	High	Master Protein	P14_v1_170035	ID:109591276 surA| chaperone SurA [Pseudomonas sp. P14]	0	FALSE	150.408	73	31	40	210	31	441	49.2	5.63	597.13	31	0	0.936	1.153	1.237	0.994001	0.977723	0.973991	18.85	25.29	41.47	108.8	115.5	75.7				2.5698e+07	2.72747e+07	1.78793e+07	High	High	High	1
FALSE	High	Master Protein	P14_v1_360033	ID:109592347 tolB| Tol-Pal system periplasmic protein TolB [Pseudomonas sp. P14]	0	FALSE	150.17	74	30	40	188	30	423	46.2	9.13	517.4	30	0	1.01	1.388	1.586	0.962926	0.98878	0.976549	19.4	37.88	38.45	107.1	117.1	75.9				2.59461e+07	2.83703e+07	1.83913e+07	High	High	High	1
FALSE	High	Master Protein	P14_v1_1260005	ID:109594562 leuC| 3-isopropylmalate dehydratase subunit LeuC [Pseudomonas sp. P14]	0	FALSE	149.244	51	22	28	243	22	477	51.2	5.83	855.89	22	0	1.242	3.534	2.781	0.652575	0.0530079	0.569999	25.36	52.7	35.35	145.6	118.3	36.1				4.7526e+07	3.86319e+07	1.1783e+07	High	High	High	1
FALSE	High	Master Protein	P14_v1_230051	ID:109591680 guaA| GMP synthetase [Pseudomonas sp. P14]	0	FALSE	149.141	73	29	35	326	29	525	58.2	5.5	789.51	29	0	0.997	1.457	1.506	0.973593	0.975244	0.986222	24.06	48.32	45.18	104.6	116.1	79.3				3.95105e+07	4.38477e+07	2.9968e+07	High	High	High	1
FALSE	High	Master Protein	P14_v1_550004	ID:109593026 sdhA| succinate:quinone oxidoreductase, FAD binding protein [Pseudomonas sp. P14]	0	FALSE	148.982	58	29	33	277	29	590	63.4	6.25	797.93	29	0	1.209	2.846	2.396	0.733903	0.192178	0.738657	14.99	25.69	32.33	136.2	113.2	50.6				2.0063e+08	1.66742e+08	7.45982e+07	High	High	High	1
FALSE	High	Master Protein	P14_v1_1610001	ID:109594751 dmdC| 3-methylmercaptopropionyl-CoA dehydrogenase [Pseudomonas sp. P14]	0	FALSE	148.896	57	27	30	174	23	601	65.5	5.95	537.91	27	4	0.955	0.959	0.972	0.985193	0.886364	0.884957	20.23	30.81	27.81	99.5	104.2	96.2				2.7168e+07	2.8444e+07	2.62649e+07	High	High	High	1
FALSE	High	Master Protein	P14_v1_310001	ID:109592080 cysS| cysteine--tRNA ligase [Pseudomonas sp. P14]	0	FALSE	148.733	62	30	36	188	30	460	51.6	5.96	535.54	30	0	0.859	1.252	1.493	0.962994	0.995378	0.986275	18.16	34.33	40.88	102.4	120.4	77.2				2.27247e+07	2.67414e+07	1.71404e+07	High	High	High	1
FALSE	High	Master Protein	P14_v1_1140008	ID:109594442 pykA| pyruvate kinase II [Pseudomonas sp. P14]	0	FALSE	147.665	76	27	29	206	27	484	52	6.7	721.65	27	0	0.315	1.209	4.039	1.36755e-05	0.989781	0.178082	13.04	25.43	24.87	62.1	188.2	49.7				4.40155e+07	1.33362e+08	3.5236e+07	High	High	High	1
FALSE	High	Master Protein	P14_v1_370002	ID:109592357 cysNC| Sulfate adenylyltransferase subunit 1 / Adenylyl-sulfate kinase [Pseudomonas sp. P14]	0	FALSE	146.448	63	27	35	216	27	633	69	5.81	666.53	27	0	0.646	1.558	2.542	0.457627	0.948129	0.677356	18.16	29.48	44.27	99.7	147.1	53.2				4.60451e+07	6.79488e+07	2.45641e+07	High	High	High	1	Met-loss [N-Term]
FALSE	High	Master Protein	P14_v1_30002	ID:109589634 cfiB| 2-oxoglutarate carboxylase small subunit [Pseudomonas sp. P14]	0	FALSE	146.282	58	26	33	285	25	471	51.9	6.48	825.38	26	0	0.492	2.13	4.411	0.0372635	0.596729	0.121123	17.67	27.93	36.34	87.1	166.3	46.6				7.65293e+07	1.46036e+08	4.08826e+07	High	High	High	1
FALSE	High	Master Protein	P14_v1_140031	ID:109591068 speA| Biosynthetic arginine decarboxylase [Pseudomonas sp. P14]	0	FALSE	145.888	50	30	32	170	30	637	71	5.58	483	30	0	1.002	1.467	1.493	0.968417	0.973252	0.986275	17.93	26.52	32.73	112.2	114.2	73.6				2.16183e+07	2.20036e+07	1.4181e+07	High	High	High	1
FALSE	High	Master Protein	P14_v1_80055	ID:109590518 outer membrane protein, adhesin transport system [Pseudomonas sp. P14]	0	FALSE	145.726	71	30	39	217	30	452	50.3	5.72	628.67	30	0	1.389	1.154	0.803	0.348194	0.977916	0.708347	22.18	23.32	23.32	119.7	78.3	102				7.99134e+07	5.2323e+07	6.81122e+07	High	High	High	1
FALSE	High	Master Protein	P14_v1_370033	ID:109592388 murE| UDP-N-acetylmuramoyl-L-alanyl-D-glutamate--2, 6-diaminopimelate ligase [Pseudomonas sp. P14]	0	FALSE	145.062	72	32	34	176	32	496	53.6	5.57	479.22	32	0	1.017	1.763	1.565	0.958614	0.865122	0.976549	22.19	29.26	38.47	116.6	113.8	69.5				2.69428e+07	2.62974e+07	1.6067e+07	High	High	High	1
FALSE	High	Master Protein	P14_v1_90094	ID:109590663 ydcS| putative ABC transporter periplasmic binding protein/polyhydroxybutyrate synthase [Pseudomonas sp. P14]	0	FALSE	145.048	68	24	32	242	24	383	41.8	6.7	698.65	24	0	1.429	1.074	0.727	0.288481	0.952025	0.592446	12.66	31.26	28.34	110.3	80.7	108.9				3.41732e+07	2.50076e+07	3.37372e+07	High	High	High	1
FALSE	High	Master Protein	P14_v1_210044	ID:109591545 peptidyl-prolyl cis-trans isomerase D [Pseudomonas sp. P14]	0	FALSE	144.982	65	35	41	195	35	623	68.6	5.2	530.17	35	0	0.968	1.448	1.531	0.984666	0.97637	0.982568	18.87	23.44	26.08	113.4	114.9	71.6				2.6519e+07	2.68757e+07	1.67537e+07	High	High	High	1
FALSE	High	Master Protein	P14_v1_680019	ID:109593456 icd| isocitrate dehydrogenase [Pseudomonas sp. P14]	0	FALSE	144.865	64	26	33	394	26	418	45.6	5.57	1137.41	26	0	1.364	0.869	0.643	0.397025	0.787776	0.443026	29.6	35.19	59.92	101.6	71.2	127.2				2.15709e+08	1.51122e+08	2.70035e+08	High	High	High	1
FALSE	High	Master Protein	P14_v1_430001	ID:109592588 fleQ| Transcriptional regulator FleQ [Pseudomonas sp. P14]	0	FALSE	144.681	58	22	30	175	22	491	55.5	5.69	544.62	22	0	0.994	1.028	1.077	0.976239	0.93013	0.929948	21.44	31.98	42.21	95.5	110.7	93.9				1.40318e+07	1.62716e+07	1.37977e+07	High	High	High	1
FALSE	High	Master Protein	P14_v1_330006	ID:109592195 yhdW| putative amino-acid ABC transporter-binding protein YhdW [Pseudomonas sp. P14]	0	FALSE	144.675	76	25	42	412	25	342	36.4	5.99	1244.44	25	0	0.464	0.197	0.401	0.0169498	8.24572e-06	0.06952	15.02	22.69	36.65	37	80.4	182.6				5.52284e+07	1.19842e+08	2.72287e+08	High	High	High	1
FALSE	High	Master Protein	P14_v1_480020	ID:109592801 ftsH| ATP-dependent zinc metalloprotease FtsH [Pseudomonas sp. P14]	0	FALSE	144.19	54	33	35	156	33	637	69.7	5.68	462.18	33	0	1.125	0.948	0.822	0.883182	0.875309	0.730604	12.51	24.38	37.12	104.1	90.5	105.4				2.75754e+07	2.39597e+07	2.79131e+07	High	High	High	1
FALSE	High	Master Protein	P14_v1_590008	ID:109593157 cyclohexadieny/prephenate dehydrogenase / 3-phosphoshikimate 1-carboxyvinyltransferase [Pseudomonas sp. P14]	0	FALSE	144.168	54	31	37	172	31	746	79	6.39	497.13	31	0	0.764	1.217	1.509	0.878629	0.990397	0.986222	29.64	27.32	53.14	96	127.6	76.4				1.54939e+07	2.05924e+07	1.23194e+07	High	High	High	1
FALSE	High	Master Protein	P14_v1_260036	ID:109591850 gltI| glutamate/aspartate ABC transporter periplasmic binding protein [Pseudomonas sp. P14]	0	FALSE	143.778	76	21	32	537	21	305	33.2	8.53	1466.48	21	0	1.298	0.587	0.451	0.53258	0.204506	0.121859	13.81	13.81	29.79	88.1	61.5	150.3				3.09773e+08	2.16309e+08	5.2823e+08	High	High	High	1
FALSE	High	Master Protein	P14_v1_460004	ID:109592707 gatA| Glutamyl-tRNA(Gln) amidotransferase subunit A [Pseudomonas sp. P14]	0	FALSE	143.664	64	22	32	157	22	483	51.5	6.28	514.98	22	0	0.83	1.32	1.464	0.947614	0.994565	0.994896	13.67	25.76	20.24	105.5	120.7	73.8				2.96488e+07	3.39185e+07	2.07528e+07	High	High	High	1
FALSE	High	Master Protein	P14_v1_280001	ID:109591918 pck| phosphoenolpyruvate carboxykinase (ATP) [Pseudomonas sp. P14]	0	FALSE	143.095	62	28	33	328	28	513	55.5	5.31	913.21	28	0	1.613	1.784	1.132	0.0957173	0.855952	0.944122	16.55	24.78	22.45	136.6	86.2	77.2				1.88559e+08	1.18954e+08	1.06567e+08	High	High	High	1	Met-loss [N-Term]
FALSE	High	Master Protein	P14_v1_260050	ID:109591864 ahpC| Alkyl hydroperoxide reductase C [Pseudomonas sp. P14]	0	FALSE	142.097	81	13	35	713	13	200	21.7	5.22	2253.24	13	0	1.253	1.466	1.267	0.634867	0.973425	0.976549	29.8	39.36	54.77	118.9	106.1	75				2.97927e+08	2.65892e+08	1.8783e+08	High	High	High	1
FALSE	High	Master Protein	P14_v1_20111	ID:109589504 iron complex outermembrane recepter protein [Pseudomonas sp. P14]	0	FALSE	141.88	58	31	33	66	31	688	74.6	5.92	197.54	31	0	13.01	11.432	1.472	1.64131e-16	1.00595e-07	0.926846	66.81	26.02	65.12	278.7	11.7	9.6				1.61822e+07	676456	559308	High	High	High	1
FALSE	High	Master Protein	P14_v1_360015	ID:109592329 proS| proline--tRNA ligase [Pseudomonas sp. P14]	0	FALSE	141.035	57	27	30	262	27	571	63.6	5.34	807.94	27	0	0.835	1.282	1.521	0.951522	0.999657	0.986222	14.97	26.81	32.13	101.6	122.8	75.6				3.34602e+07	4.04165e+07	2.48811e+07	High	High	High	1
FALSE	High	Master Protein	P14_v1_810011	ID:109593794 Pyoverdine chromophore synthetase PvdL [Pseudomonas sp. P14]	0	FALSE	140.269	12	38	39	51	36	4320	474.7	5.55	135.45	38	2	2.104	0.24	0.272	0.0325155	0.00238593	0.0133386	78.92	48.81	304.59	59.2	15.8	225				591865	158344	2.25029e+06	High	Peak Found	High	1	Met-loss [N-Term]
FALSE	High	Master Protein	P14_v1_390003	ID:109592430 hslU| ATPase component of the HslVU protease [Pseudomonas sp. P14]	0	FALSE	139.556	57	33	36	239	33	447	50	5.94	632.84	33	0	0.906	1.218	1.267	0.986344	0.990397	0.976549	25.13	30.87	59.31	103.5	111.8	84.6				4.32229e+07	4.66856e+07	3.53286e+07	High	High	High	1
FALSE	High	Master Protein	P14_v1_550008	ID:109593030 lpd| lipoamide dehydrogenase [Pseudomonas sp. P14]	0	FALSE	139.453	48	16	29	554	16	478	49.9	6.32	1575.96	16	0	0.898	2.411	2.997	0.984666	0.407358	0.480026	13.8	26.98	23.28	116.8	133.3	49.9				2.48441e+08	2.83586e+08	1.06183e+08	High	High	High	1
FALSE	High	Master Protein	P14_v1_60058	ID:109590252 fba| Fructose-bisphosphate aldolase [Pseudomonas sp. P14]	0	FALSE	139.285	62	18	30	324	16	354	38.1	5.73	989.83	18	0	0.599	0.01	0.01	0.0866802	1.38203e-16	1.15948e-16	100.9	146.78	52.48	1.9	3.3	294.8				3.91476e+06	6.91705e+06	6.12318e+08	High	High	High	1
FALSE	High	Master Protein	P14_v1_280043	ID:109591960 gabD| succinate-semialdehyde dehydrogenase (NADP(+)) GabD [Pseudomonas sp. P14]	0	FALSE	139.206	59	23	36	178	22	480	51.5	5.52	587.33	23	1	1.179	1.257	1.078	0.791784	0.996599	0.93347	16.08	20.53	33.13	113.5	99.4	87.2				5.89183e+07	5.16029e+07	4.52629e+07	High	High	High	1
FALSE	High	Master Protein	P14_v1_160056	ID:109591226 ppnN| nucleotide 5'-monophosphate nucleosidase [Pseudomonas sp. P14]	0	FALSE	138.618	77	27	32	198	27	457	50.8	6.61	514.73	27	0	0.684	1.855	2.705	0.61912	0.807953	0.60536	17.28	36.95	34.6	101.1	143	55.9				2.61366e+07	3.69527e+07	1.44325e+07	High	High	High	1
FALSE	High	Master Protein	P14_v1_40025	ID:109589867 mqo| malate:quinone oxidoreductase [Pseudomonas sp. P14]	0	FALSE	138.5	56	23	30	157	18	539	59.7	7.31	435.88	23	5	0.856	0.623	0.71	0.962926	0.275713	0.56411	13.84	19.21	32.24	76.5	98	125.6				1.64373e+07	2.10545e+07	2.69922e+07	High	High	High	1
FALSE	High	Master Protein	P14_v1_100091	ID:109590765 aceF| pyruvate dehydrogenase, E2 subunit [Pseudomonas sp. P14]	0	FALSE	137.916	56	22	27	240	22	547	55.7	5.59	824.77	22	0	0.288	0.886	2.981	1.64912e-06	0.804801	0.485968	15.58	19.09	27.94	58.6	182.5	58.9				4.91162e+07	1.53005e+08	4.93543e+07	High	High	High	1
FALSE	High	Master Protein	P14_v1_1410003	ID:109594669 deaD| ATP-dependent RNA helicase DeaD [Pseudomonas sp. P14]	0	FALSE	137.617	54	24	30	170	24	559	60.9	8.84	543.12	24	0	0.69	1.243	1.798	0.635731	0.992686	0.936415	10.73	25.75	33.01	88.8	132.6	78.6				2.4036e+07	3.59095e+07	2.12746e+07	High	High	High	1
FALSE	High	Master Protein	P14_v1_130014	ID:109590959 eno| enolase [Pseudomonas sp. P14]	0	FALSE	137.251	59	20	30	370	20	429	45.4	5.06	1192.75	20	0	0.898	1.572	1.612	0.984666	0.948129	0.972265	15.85	18.59	28.25	107.8	124.3	67.9				1.42059e+08	1.63916e+08	8.95303e+07	High	High	High	1
FALSE	High	Master Protein	P14_v1_250049	ID:109591810 quinohemoprotein amine dehydrogenase [Pseudomonas sp. P14]	0	FALSE	136.528	53	27	38	167	27	542	58.9	7.77	471.29	27	0	21.624	3.855	0.153	1.64131e-16	0.02794	6.7818e-05	30.84	42.59	34.75	228.1	9.2	62.7				8.35865e+07	3.35563e+06	2.29723e+07	High	High	High	1
FALSE	High	Master Protein	P14_v1_180005	ID:109591313 fadB| multifunctional enoyl-CoA hydratase, 3-hydroxyacyl-CoA epimerase, Delta(3)-cis- Delta(2)-trans-enoyl-CoA isomerase, L-3-hydroxyacyl-CoA dehydrogenase [Pseudomonas sp. P14]	0	FALSE	136.352	49	30	33	173	30	715	77.4	5.96	529.06	30	0	1.396	1.337	1.011	0.340514	0.990692	0.896324	21.31	31.86	22.52	117.6	87.8	94.7				2.18496e+07	1.63127e+07	1.75936e+07	High	High	High	1
FALSE	High	Master Protein	P14_v1_20163	ID:109589556 hflK| regulator of FtsH protease [Pseudomonas sp. P14]	0	FALSE	136.048	67	24	29	199	24	393	43.5	5.6	613.71	24	0	1.179	0.989	0.853	0.791784	0.907146	0.766968	30.16	29.86	30.37	105.4	88.9	105.7				3.3237e+07	2.80288e+07	3.33195e+07	High	High	High	1	Met-loss [N-Term]
FALSE	High	Master Protein	P14_v1_30068	ID:109589700 glmS| L-glutamine--D-fructose-6-phosphate aminotransferase [Pseudomonas sp. P14]	0	FALSE	135.695	54	25	31	155	25	611	66.3	6.06	515.25	25	0	1.881	1.207	0.581	0.0146413	0.989781	0.333277	22.08	38.27	46.41	131.8	66.3	101.9				2.59543e+07	1.30546e+07	2.00626e+07	High	High	High	1	Met-loss [N-Term]
FALSE	High	Master Protein	P14_v1_230050	ID:109591679 guaB| inosine 5'-monophosphate dehydrogenase [Pseudomonas sp. P14]	0	FALSE	135.027	56	24	30	239	24	489	51.7	6.98	684.3	24	0	0.972	1.011	1.055	0.984666	0.918265	0.922898	23.31	32.97	33.55	108.1	108.5	83.3				1.18781e+08	1.19213e+08	9.15247e+07	High	High	High	1
FALSE	High	Master Protein	P14_v1_1020016	ID:109594273 rhlE| ATP-dependent RNA helicase RhlE [Pseudomonas sp. P14]	0	FALSE	134.943	53	29	31	158	29	626	68	9.96	449.5	29	0	0.754	1.436	2.038	0.859095	0.976559	0.885242	18.47	26.87	36.3	101.3	129.3	69.4				2.10216e+07	2.68393e+07	1.44045e+07	High	High	High	1
FALSE	High	Master Protein	P14_v1_550009	ID:109593031 sucC| succinyl-CoA synthetase subunit beta [Pseudomonas sp. P14]	0	FALSE	134.847	68	23	34	414	23	388	41.2	6.2	1197.34	23	0	0.532	1.868	3.578	0.0893125	0.802209	0.283152	13.93	17.38	30.01	87.5	162	50.4				2.45565e+08	4.54513e+08	1.4149e+08	High	High	High	1
FALSE	High	Master Protein	P14_v1_590019	ID:109593168 capD| UDP-glucose 4-epimerase [Pseudomonas sp. P14]	0	FALSE	134.643	75	29	34	251	29	346	38.6	6.89	703.55	29	0	0.807	0.864	1.032	0.92833	0.783294	0.906924	19.41	21.41	30.03	89.1	105.7	105.1				7.48762e+07	8.88417e+07	8.83385e+07	High	High	High	1
FALSE	High	Master Protein	P14_v1_40182	ID:109590024 type VI secretion system secreted protein VgrG [Pseudomonas sp. P14]	0	FALSE	134.466	51	25	31	135	25	618	69.6	5.74	388.85	25	0	0.992	0.564	0.649	0.979569	0.169868	0.456671	18.26	44.73	37.19	74.7	83.6	141.7				1.09193e+07	1.22308e+07	2.07296e+07	High	High	High	1
FALSE	High	Master Protein	P14_v1_210040	ID:109591541 clpX| ATP-dependent Clp protease ATP-binding subunit ClpX [Pseudomonas sp. P14]	0	FALSE	134.393	71	25	27	185	25	427	46.8	5.21	547.6	25	0	0.912	1.405	1.442	0.989739	0.984595	0.997122	24.7	30.18	40.71	105.2	121.2	73.6				3.96041e+07	4.56617e+07	2.7715e+07	High	High	High	1
FALSE	High	Master Protein	P14_v1_500006	ID:109592858 ppx| exopolyphosphatase [Pseudomonas sp. P14]	0	FALSE	133.569	57	29	30	219	29	500	56	6.81	601.76	29	0	1.022	0.974	1.051	0.95737	0.898842	0.920827	16.73	41.07	47.89	96.5	119.3	84.1				2.45598e+07	3.03599e+07	2.14063e+07	High	High	High	1
FALSE	High	Master Protein	P14_v1_700011	ID:109593498 Amidohydrolase [Pseudomonas sp. P14]	0	FALSE	133.522	55	25	29	147	25	613	67.8	6.21	430.92	25	0	1.211	0.737	0.681	0.730874	0.522621	0.511992	10.05	28.73	23.62	95.3	79.3	125.4				1.39526e+07	1.16155e+07	1.83652e+07	High	High	High	1
FALSE	High	Master Protein	P14_v1_370042	ID:109592397 ftsA| cell division protein FtsA [Pseudomonas sp. P14]	0	FALSE	132.789	68	24	31	190	24	420	44.9	5.34	585.86	24	0	0.863	1.878	2.162	0.970595	0.790958	0.840758	18.17	27.73	31.34	111	131.1	57.9				2.52571e+07	2.98215e+07	1.31845e+07	High	High	High	1
FALSE	High	Master Protein	P14_v1_390022	ID:109592449 mcpQ| Methyl-accepting chemotaxis protein McpQ [Pseudomonas sp. P14]	0	FALSE	132.586	45	24	27	142	23	638	69	5.17	440.42	24	0	0.844	0.489	0.583	0.941277	0.0609103	0.346135	17.26	27.58	25.41	75.1	84.4	140.5				9.4241e+06	1.05813e+07	1.76179e+07	High	High	High	1
FALSE	High	Master Protein	P14_v1_170018	ID:109591259 diguanylate cyclase [Pseudomonas sp. P14]	0	FALSE	132.577	33	30	33	112	30	1247	139.3	5.74	320.47	30	0	1.156	1.027	0.928	0.874695	0.969306	0.944122	25.95	28.06	18	108.4	107.4	84.2				5.29405e+06	5.24256e+06	4.10831e+06	High	High	High	1
FALSE	High	Master Protein	P14_v1_460016	ID:109592719 tldE| metalloprotease subunit TldE [Pseudomonas sp. P14]	0	FALSE	132.413	66	21	27	148	21	448	47.7	5.33	435.13	21	0	0.789	1.162	1.609	0.904505	0.980679	0.972927	18.01	26.96	43.64	96.2	127	76.8				1.49152e+07	1.96879e+07	1.19153e+07	High	High	High	1
FALSE	High	Master Protein	P14_v1_60063	ID:109590257 cbbQ| Protein CbbQ [Pseudomonas sp. P14]	0	FALSE	132.263	76	18	32	226	18	269	29.9	6.04	692.76	18	0	0.333	0.01	0.021	1.31078e-05	1.38203e-16	1.15948e-16	46.39	95.18	85.39	0.8	3.7	295.5				381122	1.73509e+06	1.38571e+08	High	High	High	1	Met-loss [N-Term]
FALSE	High	Master Protein	P14_v1_870011	ID:109593945 rapA| RNA polymerase-binding ATPase and RNAP recycling factor [Pseudomonas sp. P14]	0	FALSE	132.022	39	32	33	146	32	948	106	5.2	382.69	32	0	0.86	1.03	1.16	0.951676	0.948129	0.981522	22.78	33.98	46.63	93.1	110.9	95.9				9.23988e+06	1.10045e+07	9.51618e+06	High	High	High	1	Met-loss [N-Term]
FALSE	High	Master Protein	P14_v1_240048	ID:109591732 katA| Catalase [Pseudomonas sp. P14]	0	FALSE	131.419	62	25	36	214	25	479	53.6	6.58	569.47	25	0	0.854	9.887	10.773	0.962705	8.17129e-07	0.000327628	18.43	40.93	53.04	127.6	157.1	15.3				7.0519e+07	8.67935e+07	8.4474e+06	High	High	High	1
FALSE	High	Master Protein	P14_v1_90090	ID:109590659 patD| gamma-aminobutyraldehyde dehydrogenase [Pseudomonas sp. P14]	0	FALSE	131.339	71	22	26	172	22	481	51.8	5.58	538.96	22	0	1.277	1.357	1.046	0.579861	0.989995	0.918725	16.39	24.47	40.79	115.5	94	90.5				4.02474e+07	3.27708e+07	3.1552e+07	High	High	High	1
FALSE	High	Master Protein	P14_v1_860022	ID:109593933 serA| phosphoglycerate dehydrogenase [Pseudomonas sp. P14]	0	FALSE	131.028	59	16	29	387	16	409	44.4	6.2	1264.43	16	0	0.593	1.614	2.48	0.248828	0.927459	0.704642	19.01	23.36	39.97	92.7	150.5	56.8				5.97588e+07	9.69886e+07	3.66409e+07	High	High	High	1
FALSE	High	Master Protein	P14_v1_370027	ID:109592382 putative LppC lipoprotein [Pseudomonas sp. P14]	0	FALSE	130.822	47	20	25	121	20	605	64.6	7.42	408.27	20	0	1.121	0.978	0.831	0.895216	0.907146	0.817738	10.51	22.48	28.42	103.9	89.7	106.4				1.21963e+07	1.05314e+07	1.24839e+07	High	High	High	1
FALSE	High	Master Protein	P14_v1_110071	ID:109590838 glyA| serine hydroxymethyltransferase [Pseudomonas sp. P14]	0	FALSE	130.792	62	22	33	328	19	417	44.9	6.25	1033.16	22	3	1.005	1.978	2.01	0.963671	0.730557	0.896324	18	44.93	32.75	114.6	121.2	64.2				2.57586e+08	2.72462e+08	1.44351e+08	High	High	High	1
FALSE	High	Master Protein	P14_v1_440007	ID:109592635 pgi| glucose-6-phosphate isomerase [Pseudomonas sp. P14]	0	FALSE	130.096	47	22	32	274	22	554	61.4	6.77	591.9	22	0	0.833	1.576	1.679	0.950677	0.946407	0.959397	25.17	38.33	43.9	105.1	117.8	77.1				4.04277e+07	4.52901e+07	2.96557e+07	High	High	High	1
FALSE	High	Master Protein	P14_v1_20237	ID:109589630 fba| Fructose-bisphosphate aldolase [Pseudomonas sp. P14]	0	FALSE	129.671	63	21	29	312	19	354	38.4	5.77	859.98	21	2	0.978	1.157	1.142	0.984666	0.978668	0.947328	12.59	24.61	22	89	88.9	122.1				1.7061e+08	1.70451e+08	2.34193e+08	High	High	High	1
FALSE	High	Master Protein	P14_v1_310046	ID:109592125 mcpP| Methyl-accepting chemotaxis protein McpP [Pseudomonas sp. P14]	0	FALSE	129.581	58	24	32	133	22	544	58.6	6.09	387.48	24	0	2.55	1.05	0.366	6.56627e-05	0.948129	0.0518266	30.04	33.98	43.25	124.6	40.2	135.2				1.83444e+07	5.9242e+06	1.9908e+07	High	High	High	1
FALSE	High	Master Protein	P14_v1_60043	ID:109590237 hndC| NADP-reducing hydrogenase subunit HndC [Pseudomonas sp. P14]	0	FALSE	129.153	64	28	32	112	27	511	54.7	4.83	345.99	28	1	0.484	0.01	0.01	0.0327442	1.38203e-16	1.15948e-16	37.46	11.51	83.37	0.6	1.3	298.1				233016	485667	1.12746e+08	High	High	High	1
FALSE	High	Master Protein	P14_v1_90036	ID:109590605 lepA| 30S ribosomal subunit biogenesis factor LepA [Pseudomonas sp. P14]	0	FALSE	128.912	49	26	30	118	26	599	66	5.78	354.21	26	0	0.812	1.764	1.977	0.919958	0.810235	0.835567	27.08	45.1	35.97	103.1	133.8	63				9.51212e+06	1.23405e+07	5.81376e+06	High	High	High	1
FALSE	High	Master Protein	P13645	SWISS-PROT:P13645 Tax_Id=9606 Gene_Symbol=KRT10 Keratin, type I cytoskeletal 10	0	TRUE	128.584	40	27	32	163	19	593	59.5	5.21	461.4	27	10	0.836	1.187	1.514	0.951522	0.988373	0.986222	28.22	39.74	32.67	97.7	120.9	81.4				3.61782e+07	4.47526e+07	3.01565e+07	High	High	High	1
FALSE	High	Master Protein	P14_v1_230026	ID:109591655 gap| Glyceraldehyde-3-phosphate dehydrogenase [Pseudomonas sp. P14]	0	FALSE	128.366	83	18	28	173	18	333	36	6.99	543.18	18	0	0.128	1.082	7.625	1.64131e-16	0.964781	0.00488684	21.43	42.09	26.47	31.2	240.3	28.6				1.09564e+07	8.44857e+07	1.00527e+07	High	High	High	1
FALSE	High	Master Protein	P14_v1_80024	ID:109590487 fadD| long-chain-fatty-acid--CoA ligase [Pseudomonas sp. P14]	0	FALSE	127.12	60	25	29	88	25	562	61.6	7.69	288.35	25	0	1.275	0.525	0.422	0.59643	0.112583	0.146118	19.07	21.27	34.31	78.4	61.5	160.1				7.7392e+06	6.07513e+06	1.57985e+07	High	High	High	1
FALSE	High	Master Protein	P14_v1_480026	ID:109592807 nusA| transcription termination/antitermination protein NusA [Pseudomonas sp. P14]	0	FALSE	127.119	53	29	32	240	29	493	54.6	4.67	692.66	29	0	0.884	1.151	1.272	0.984666	0.97682	0.97678	12.01	35.7	24.18	96.6	120.4	83.1				7.59503e+07	9.46583e+07	6.53143e+07	High	High	High	1
FALSE	High	Master Protein	P14_v1_660015	ID:109593390 rlmL| fused 23S rRNA m(2)G2445 methyltransferase and 23S rRNA m(7)G2069 methyltransferase [Pseudomonas sp. P14]	0	FALSE	126.732	46	32	37	172	32	730	82.3	8.41	431.77	32	0	1.185	1.325	1.129	0.779319	0.992929	0.944122	15.52	37.21	43.84	116.7	97.6	85.7				2.00686e+07	1.67947e+07	1.47401e+07	High	High	High	1	Met-loss [N-Term]
FALSE	High	Master Protein	P04264	SWISS-PROT:P04264 Tax_Id=9606 Gene_Symbol=KRT1 Keratin, type II cytoskeletal 1	0	TRUE	126.502	36	29	33	169	22	644	66	8.12	457.34	29	2	0.656	1.139	1.72	0.496236	0.975411	0.950296	17.73	42.92	43.39	86.4	132.9	80.6				2.84806e+07	4.37885e+07	2.65687e+07	High	High	High	1
FALSE	High	Master Protein	P14_v1_140017	ID:109591054 fabG| 3-oxoacyl-[acyl-carrier-protein] reductase [NADH] [Pseudomonas sp. P14]	0	FALSE	125.502	67	19	26	117	19	450	47	6.58	369.09	19	0	1.2	0.689	0.591	0.799698	0.434044	0.524729	21.94	31.92	24.41	89.6	72.6	137.8				8.47272e+06	6.8604e+06	1.30292e+07	High	High	High	1	Met-loss [N-Term]
FALSE	High	Master Protein	P14_v1_230036	ID:109591665 ugpC| sn-glycerol 3-phosphate ABC transporter ATP binding subunit [Pseudomonas sp. P14]	0	FALSE	124.483	63	19	24	198	19	384	41.9	6.7	629.05	19	0	0.596	0.352	0.561	0.257675	0.00542926	0.294189	15.81	23.33	44.1	50.7	82.1	167.3				3.48239e+07	5.63882e+07	1.14958e+08	High	High	High	1
FALSE	High	Master Protein	P14_v1_550010	ID:109593032 sucD| succinyl-CoA synthetase subunit alpha [Pseudomonas sp. P14]	0	FALSE	123.481	88	17	26	383	17	294	30.1	6.29	1268.46	17	0	0.554	1.592	3.107	0.1331	0.940169	0.435523	18.2	40.71	41.39	89.4	161	49.6				1.91667e+08	3.45414e+08	1.06387e+08	High	High	High	1
FALSE	High	Master Protein	P14_v1_20197	ID:109589590 outer membrane protein [Pseudomonas sp. P14]	0	FALSE	123.436	66	26	30	120	26	477	52.6	5.6	372.43	26	0	0.683	1.126	1.748	0.610313	0.978308	0.944122	27.87	35.41	32.8	89.7	139.1	71.2				1.18938e+07	1.84412e+07	9.44207e+06	High	High	High	1
FALSE	High	Master Protein	P14_v1_440006	ID:109592634 acs| acetyl-CoA synthetase (AMP-forming) [Pseudomonas sp. P14]	0	FALSE	123.419	47	26	27	162	26	644	71.2	6.55	478.75	26	0	0.932	0.82	0.912	0.997225	0.69935	0.835567	17.63	31.21	38.65	91.7	98	110.3				2.45106e+07	2.6188e+07	2.9475e+07	High	High	High	1
FALSE	High	Master Protein	P14_v1_80097	ID:109590560 argD| N-acetylornithine aminotransferase/N-succinyldiaminopimelate aminotransferase [Pseudomonas sp. P14]	0	FALSE	123.383	81	21	27	143	21	406	43.5	6.47	529.22	21	0	0.778	1.526	2.004	0.895216	0.955806	0.896324	20.29	26.56	32.91	106.5	141.4	52.1				2.277e+07	3.02207e+07	1.11284e+07	High	High	High	1
FALSE	High	Master Protein	P14_v1_240050	ID:109591734 rpoA| RNA polymerase subunit alpha [Pseudomonas sp. P14]	0	FALSE	123.089	67	24	30	302	24	333	36.6	5.03	838.81	24	0	0.903	1.231	1.276	0.985193	0.990692	0.977058	22.18	51.89	64.2	103.3	116.7	80				1.29173e+08	1.45915e+08	9.99961e+07	High	High	High	1
FALSE	High	Master Protein	P14_v1_970003	ID:109594174 Polyphosphate:AMP phosphotransferase [Pseudomonas sp. P14]	0	FALSE	122.908	65	26	29	173	26	497	57.6	7.97	511.81	26	0	0.559	0.764	1.479	0.145883	0.548358	0.989417	16.47	18.01	19.12	70.5	134.2	95.3				1.18297e+07	2.24984e+07	1.598e+07	High	High	High	1
FALSE	High	Master Protein	P14_v1_60053	ID:109590247 pgk| phosphoglycerate kinase [Pseudomonas sp. P14]	0	FALSE	122.704	57	20	25	122	17	397	41.5	4.89	324.76	20	3	1.09	0.135	0.012	0.92833	3.15553e-08	1.15948e-16	38.78	107.86	144.6	20.3	20	259.6				8.3216e+06	8.18561e+06	1.06184e+08	Peak Found	High	High	1
FALSE	High	Master Protein	P14_v1_20160	ID:109589553 purA| adenylosuccinate synthetase [Pseudomonas sp. P14]	0	FALSE	122.325	51	20	29	236	20	430	46.8	5.85	716.7	20	0	0.725	1.138	1.79	0.767819	0.975244	0.938608	21.1	37.72	52.27	97	128.5	74.5				5.31564e+07	7.04108e+07	4.08374e+07	High	High	High	1
FALSE	High	Master Protein	P14_v1_170049	ID:109591290 trpE| Anthranilate synthase component 1 [Pseudomonas sp. P14]	0	FALSE	121.755	61	25	27	173	25	493	54.4	5.21	505.92	25	0	0.954	1.213	1.238	0.986344	0.989781	0.974048	19.78	32.87	26.24	110.4	110.7	78.8				2.2853e+07	2.292e+07	1.6317e+07	High	High	High	1
FALSE	High	Master Protein	P14_v1_280042	ID:109591959 gabT| 4-aminobutyrate aminotransferase GabT [Pseudomonas sp. P14]	0	FALSE	120.779	66	21	25	142	21	425	44.8	6.2	463.98	21	0	1.027	1.108	1.028	0.953528	0.964781	0.906027	18.26	20.47	26.28	103.1	99.8	97.1				2.64144e+07	2.55642e+07	2.48715e+07	High	High	High	1
FALSE	High	Master Protein	P14_v1_20236	ID:109589629 diguanylate cyclase [Pseudomonas sp. P14]	0	FALSE	120.61	40	24	29	154	24	709	78.8	5.19	406.88	24	0	1.119	0.847	0.832	0.893582	0.756135	0.741688	15.93	31.68	39.76	97.8	87.2	115				1.54662e+07	1.37969e+07	1.81988e+07	High	High	High	1
FALSE	High	Master Protein	P14_v1_340010	ID:109592243 metG| methionine--tRNA ligase [Pseudomonas sp. P14]	0	FALSE	120.488	46	29	32	175	29	679	75.1	5.8	458.87	29	0	0.843	1.034	1.231	0.954962	0.937352	0.972265	16.54	27.78	28.78	92	118	90.1				2.67653e+07	3.4345e+07	2.62128e+07	High	High	High	1
FALSE	High	Master Protein	P14_v1_30020	ID:109589652 putative fatty acid methyltransferase [Pseudomonas sp. P14]	0	FALSE	120.354	60	22	28	139	22	394	44.3	6.09	432.44	22	0	1.33	2.756	1.828	0.472246	0.229001	0.93347	28.15	48.71	49.8	137.1	105.4	57.5				3.86555e+07	2.97229e+07	1.62034e+07	High	High	High	1	Acetyl [N-Term]
FALSE	High	Master Protein	P14_v1_490003	ID:109592816 spoT| bifunctional (p)ppGpp synthase/hydrolase SpoT [Pseudomonas sp. P14]	0	FALSE	120.144	46	26	28	125	26	702	78.6	8.85	364.61	26	0	0.908	0.904	1.025	0.973118	0.885003	0.951177	20.22	39.64	34.64	94.4	102.1	103.6				7.03106e+06	7.6078e+06	7.71649e+06	High	High	High	1	Met-loss [N-Term]
FALSE	High	Master Protein	P14_v1_320043	ID:109592179 hisS| histidine--tRNA ligase [Pseudomonas sp. P14]	0	FALSE	120.044	66	26	30	169	26	429	47.7	5.41	472.36	26	0	0.719	1.445	1.961	0.745597	0.976459	0.896324	26.06	27.95	49.58	100.7	132.5	66.7				2.04458e+07	2.68998e+07	1.35374e+07	High	High	High	1
FALSE	High	Master Protein	P14_v1_260041	ID:109591855 glpK| glycerol kinase [Pseudomonas sp. P14]	0	FALSE	119.837	60	23	26	123	23	499	55.2	5.34	343.62	23	0	0.62	0.469	0.775	0.344438	0.046911	0.66693	18.64	35.76	32.68	69.1	112.9	118				9.25646e+06	1.51117e+07	1.58027e+07	High	High	High	1
FALSE	High	Master Protein	P14_v1_100035	ID:109590709 AsmA protein [Pseudomonas sp. P14]	0	FALSE	119.398	40	27	32	136	27	748	80.3	6.13	393.12	27	0	1.083	1.084	0.936	0.919958	0.963269	0.896324	21.92	26.39	29.85	105.1	97.1	97.9				1.26763e+07	1.17116e+07	1.18074e+07	High	High	High	1
FALSE	High	Master Protein	P14_v1_30073	ID:109589705 atpG| ATP synthase F1 complex subunit gamma [Pseudomonas sp. P14]	0	FALSE	119.091	71	16	29	269	16	286	31.4	8.84	817.93	16	0	1.177	1.124	0.969	0.796695	0.972415	0.882953	20.24	37.18	43.94	108.5	93.3	98.2				8.43007e+07	7.24478e+07	7.62345e+07	High	High	High	1
FALSE	High	Master Protein	P14_v1_30126	ID:109589758 trpB| tryptophan synthase subunit beta [Pseudomonas sp. P14]	0	FALSE	119.085	64	19	26	241	19	405	44	6.44	683.33	19	0	0.448	0.738	1.466	0.010376	0.522621	0.994668	21.67	22.52	40.07	66.4	140.4	93.2				1.99245e+07	4.21534e+07	2.79641e+07	High	High	High	1	Met-loss [N-Term]
FALSE	High	Master Protein	P14_v1_680024	ID:109593461 purB| adenylosuccinate lyase [Pseudomonas sp. P14]	0	FALSE	119.046	59	20	24	142	20	472	52.5	6.23	469.94	20	0	0.776	2.086	2.529	0.895216	0.636816	0.682586	14.22	21.08	30.03	106.3	139.9	53.8				4.09553e+07	5.3928e+07	2.07182e+07	High	High	High	1
FALSE	High	Master Protein	P14_v1_1130004	ID:109594425 ATP-binding cassette, subfamily C, bacterial LapB [Pseudomonas sp. P14]	0	FALSE	118.733	42	26	28	112	26	718	78.5	7.64	299	26	0	1.138	1.215	1.094	0.887709	0.994565	0.972265	18.53	20.23	23.87	109.3	99.3	91.4				1.15015e+07	1.04499e+07	9.62291e+06	High	High	High	1
FALSE	High	Master Protein	P14_v1_1000015	ID:109594240 prpC| 2-methylcitrate synthase [Pseudomonas sp. P14]	0	FALSE	118.408	73	21	27	242	21	375	42	6.71	669.24	21	0	1.334	1.144	0.863	0.461361	0.976559	0.777022	13.38	15.34	14.93	113.9	85.7	100.4				4.65541e+07	3.50392e+07	4.10459e+07	High	High	High	1
FALSE	High	Master Protein	P14_v1_180063	ID:109591371 universal stress protein E [Pseudomonas sp. P14]	0	FALSE	118.261	83	19	25	286	19	287	31.4	6.34	784.63	19	0	0.751	6.221	7.128	0.852044	0.000313573	0.00782298	18.3	46.03	52.21	122.7	155.3	22				7.03569e+07	8.90798e+07	1.26452e+07	High	High	High	1
FALSE	High	Master Protein	P14_v1_450004	ID:109592670 potF| putrescine ABC transporter periplasmic binding protein [Pseudomonas sp. P14]	0	FALSE	117.9	58	19	27	359	19	365	40.1	6.71	1184.34	19	0	0.998	0.861	0.857	0.973118	0.775668	0.774772	17.09	32.99	29.49	96.4	96	107.6				1.24652e+08	1.24162e+08	1.39231e+08	High	High	High	1
FALSE	High	Master Protein	P14_v1_60136	ID:109590330 Peptidylprolyl isomerase [Pseudomonas sp. P14]	0	FALSE	117.876	39	23	26	95	23	766	87	7.06	261.42	23	0	2.237	2.389	1.056	0.000192747	0.470063	0.979758	19.49	21.25	31.16	171.2	71.5	57.4				8.77112e+06	3.66167e+06	2.93938e+06	High	High	High	1
FALSE	High	Master Protein	P14_v1_460003	ID:109592706 gatB| Aspartyl/glutamyl-tRNA(Asn/Gln) amidotransferase subunit B [Pseudomonas sp. P14]	0	FALSE	117.645	57	25	27	164	25	481	52.6	5.17	452.49	25	0	0.908	1.479	1.649	0.986584	0.967567	0.966503	8.78	25.67	21.35	107.6	119.3	73.1				3.25492e+07	3.60924e+07	2.21325e+07	High	High	High	1
FALSE	High	Master Protein	P14_v1_710011	ID:109593522 glnD| PII uridylyltransferase/uridylyl removing enzyme [Pseudomonas sp. P14]	0	FALSE	117.275	32	26	29	96	26	900	102.6	5.99	256.9	26	0	0.99	0.937	0.925	0.984666	0.890393	0.918758	14.16	37.32	30.49	97.3	97.4	105.2				8.62026e+06	8.62548e+06	9.31984e+06	High	High	High	1
FALSE	High	Master Protein	P14_v1_1260007	ID:109594564 diguanylate cyclase [Pseudomonas sp. P14]	0	FALSE	116.778	35	35	35	103	34	1098	124	5.82	245.88	35	1	1.194	0.968	0.864	0.804528	0.932351	0.914402	23.55	38.75	29.65	107.7	86.9	105.5				7.23367e+06	5.83528e+06	7.08673e+06	High	High	High	1
FALSE	High	Master Protein	P14_v1_40157	ID:109589999 tssC| Type VI secretion system sheath protein TssC1 [Pseudomonas sp. P14]	0	FALSE	116.743	55	24	27	100	24	500	56.1	5.27	290.45	24	0	1.353	1.09	0.825	0.393915	0.977723	0.885242	25.63	35.06	60.45	111.9	84.9	103.2				7.27507e+06	5.5185e+06	6.71372e+06	High	High	High	1
FALSE	High	Master Protein	P14_v1_190029	ID:109591406 gltD| glutamate synthase subunit GltD [Pseudomonas sp. P14]	0	FALSE	116.367	54	21	22	126	21	472	51.8	6.37	395.78	21	0	0.725	1.557	2.131	0.767819	0.948129	0.852893	14.2	19.08	12.69	100.7	142.5	56.8				2.13197e+07	3.01863e+07	1.20221e+07	High	High	High	1
FALSE	High	Master Protein	P14_v1_1550001	ID:109594737 fabV| Enoyl-[acyl-carrier-protein] reductase [NADH] [Pseudomonas sp. P14]	0	FALSE	116.356	62	26	29	225	26	403	44.2	5.31	616.95	26	0	1.033	1.336	1.176	0.951522	0.990692	0.959397	36.4	35.08	52.35	111.1	106.8	82.1				6.66588e+07	6.41005e+07	4.92796e+07	High	High	High	1
FALSE	High	Master Protein	P14_v1_1260001	ID:109594558 asd| aspartate-semialdehyde dehydrogenase [Pseudomonas sp. P14]	0	FALSE	116.207	56	17	22	160	17	370	40.6	5.63	526.59	17	0	1.035	1.118	1.105	0.951522	0.969306	0.936415	19.07	15.53	25.87	102.7	99.7	97.6				4.37156e+07	4.24615e+07	4.15477e+07	High	High	High	1
FALSE	High	Master Protein	P14_v1_20143	ID:109589536 livJ| branched chain amino acid/phenylalanine ABC transporter periplasmic binding protein [Pseudomonas sp. P14]	0	FALSE	116.112	59	21	36	318	21	378	40.2	6.3	966.65	21	0	0.816	0.216	0.269	0.93666	2.60718e-05	0.00619199	29.14	24.9	40.36	45.4	55.8	198.8				9.60321e+07	1.17966e+08	4.2058e+08	High	High	High	1
FALSE	High	Master Protein	P14_v1_1390003	ID:109594665 aer| Methyl-accepting chemotaxis protein Aer [Pseudomonas sp. P14]	0	FALSE	116.101	45	20	27	98	18	521	57	6.1	360.31	20	0	0.853	0.497	0.631	0.92833	0.0926652	0.51323	14.09	33.11	33.54	69.1	89.7	141.2				6.73428e+06	8.73623e+06	1.37508e+07	High	High	High	1
FALSE	High	Master Protein	P14_v1_20007	ID:109589400 type I restriction enzyme M protein [Pseudomonas sp. P14]	0	FALSE	115.813	50	28	29	111	28	680	77.4	6.38	321.47	28	0	0.823	1.607	1.908	0.941277	0.907703	0.884394	28.4	29.4	30.01	107.8	125.3	66.9				1.27823e+07	1.48571e+07	7.92534e+06	High	High	High	1
FALSE	High	Master Protein	P14_v1_140001	ID:109591038 bauC| Malonate-semialdehyde dehydrogenase [Pseudomonas sp. P14]	0	FALSE	115.49	61	22	25	114	21	497	53.5	5.9	370.88	22	1	1.428	2.28	1.544	0.289401	0.455031	0.971401	11.97	28.17	27.38	141.9	98.3	59.8				1.96974e+07	1.36545e+07	8.30098e+06	High	High	High	1	Met-loss [N-Term]
FALSE	High	Master Protein	P14_v1_760004	ID:109593646 outer membrane protein assembly factor BamC [Pseudomonas sp. P14]	0	FALSE	115.432	65	20	25	166	20	373	40.8	5.19	531.64	20	0	1.066	1.025	0.956	0.92833	0.929808	0.868362	15.42	23.4	33.29	102.4	99.7	97.9				2.02411e+07	1.97081e+07	1.93636e+07	High	High	High	1
FALSE	High	Master Protein	P14_v1_420016	ID:109592566 mmsA| Methylmalonate-semialdehyde dehydrogenase [acylating] [Pseudomonas sp. P14]	0	FALSE	115.401	52	21	24	308	21	508	54.4	6.16	650.69	21	0	0.984	1.678	1.609	0.980973	0.903689	0.973197	25.31	41.81	40.24	110.9	118.1	71				2.90272e+07	3.0907e+07	1.85933e+07	High	High	High	1	Met-loss [N-Term]
FALSE	High	Master Protein	P14_v1_170027	ID:109591268 ycgB| PF04293 family protein YcgB [Pseudomonas sp. P14]	0	FALSE	115.133	41	21	25	117	21	522	61.3	5.62	340.7	21	0	1.095	2.285	2.026	0.904505	0.490337	0.890657	22.01	43.86	42.87	128.5	111.1	60.4				2.47202e+07	2.1378e+07	1.16297e+07	High	High	High	1
FALSE	High	Master Protein	P14_v1_50079	ID:109590106 qedA| Quinoprotein ethanol dehydrogenase [Pseudomonas sp. P14]	0	FALSE	114.819	48	25	32	129	25	595	64.8	8.7	336.46	25	0	25.345	0.296	0.011	1.64131e-16	0.00103026	1.15948e-16	22.04	33.13	35.26	59.6	0.5	239.9				7.92109e+06	61500	3.18581e+07	High	High	High	1
FALSE	High	Master Protein	P14_v1_20196	ID:109589589 thiC| phosphomethylpyrimidine synthase [Pseudomonas sp. P14]	0	FALSE	114.815	54	28	30	98	28	626	69.7	5.87	229.63	28	0	1.183	0.297	0.234	0.799698	0.000639442	0.00455796	19.96	19.46	34.66	50.5	43.9	205.6				4.90897e+06	4.27351e+06	1.999e+07	High	High	High	1
FALSE	High	Master Protein	P14_v1_530020	ID:109592979 putative iron-regulated protein [Pseudomonas sp. P14]	0	FALSE	114.615	58	21	27	189	21	443	47	4.75	510.58	21	0	0.946	0.428	0.436	0.990517	0.0278807	0.104684	13.55	29.33	48.47	65.3	68.9	165.8				2.18047e+07	2.30272e+07	5.53776e+07	High	High	High	1
FALSE	High	Master Protein	P14_v1_1370003	ID:109594651 nrdB| Ribonucleoside-diphosphate reductase subunit beta [Pseudomonas sp. P14]	0	FALSE	114.267	63	21	25	174	21	416	47	4.91	439.1	21	0	0.908	1.726	1.957	0.986584	0.883996	0.896324	13.14	27.75	45.51	109.4	131.3	59.3				2.58065e+07	3.09841e+07	1.39951e+07	High	High	High	1
FALSE	High	Master Protein	P14_v1_20093	ID:109589486 purD| phosphoribosylamine--glycine ligase [Pseudomonas sp. P14]	0	FALSE	114.164	55	18	23	152	18	431	45.8	5.17	486.85	18	0	0.935	1.395	1.491	0.994001	0.987039	0.986275	13.01	24.63	30.37	105	115.8	79.2				2.55904e+07	2.82104e+07	1.92911e+07	High	High	High	1
FALSE	High	Master Protein	P14_v1_140002	ID:109591039 Omega-amino acid--pyruvate aminotransferase [Pseudomonas sp. P14]	0	FALSE	114.062	57	15	27	110	15	448	48.5	6.76	365.73	15	0	0.887	1.942	2.442	0.984666	0.687274	0.608535	12.89	21.07	22.31	114	130.8	55.3				1.09072e+07	1.25162e+07	5.28796e+06	High	High	High	1
FALSE	High	Master Protein	P14_v1_510012	ID:109592897 dppA| dipeptide ABC transporter periplasmic binding protein [Pseudomonas sp. P14]	0	FALSE	114.06	43	18	26	173	17	541	60.3	7.09	494.19	18	1	0.955	1.172	1.225	0.985193	0.983107	0.971401	16.66	29.22	21.2	100.2	112.1	87.7				2.52259e+07	2.82075e+07	2.20634e+07	High	High	High	1
FALSE	High	Master Protein	P14_v1_300044	ID:109592070 fimV| Motility hub protein FimV [Pseudomonas sp. P14]	0	FALSE	113.631	33	24	27	112	24	911	96.8	4.21	323.58	24	0	1.271	1.03	0.811	0.634955	0.948129	0.815661	14.37	31.12	38.22	105.1	88	106.9				1.14526e+07	9.5826e+06	1.16449e+07	High	High	High	1
FALSE	High	Master Protein	P14_v1_40042	ID:109589884 Response regulator [Pseudomonas sp. P14]	0	FALSE	113.355	64	23	27	115	23	456	51.3	5.85	306.45	23	0	0.95	3.068	3.417	0.986584	0.13118	0.333277	11.25	37.85	56.14	127.2	132.6	40.3				2.5152e+07	2.62245e+07	7.96567e+06	High	High	High	1
FALSE	High	Master Protein	P14_v1_200011	ID:109591445 Protein CR006 P-loop domain-containing protein [Pseudomonas sp. P14]	0	FALSE	113.355	37	28	30	99	28	849	94.7	5.63	270.24	28	0	1.338	1.128	0.936	0.479535	0.980679	0.926846	17.52	27.45	13.53	112.2	89.7	98.1				9.2019e+06	7.35204e+06	8.04182e+06	High	High	High	1	Met-loss [N-Term]
FALSE	High	Master Protein	P14_v1_490025	ID:109592838 puuC| gamma-glutamyl-gamma-aminobutyraldehyde dehydrogenase [Pseudomonas sp. P14]	0	FALSE	113.009	61	19	24	158	19	497	53	5.95	502.15	19	0	1.194	0.78	0.603	0.76297	0.606643	0.372383	22.07	28.26	14.9	98.8	77.1	124.2				3.21705e+07	2.51092e+07	4.04398e+07	High	High	High	1
FALSE	High	Master Protein	P14_v1_650032	ID:109593375 mqo| malate:quinone oxidoreductase [Pseudomonas sp. P14]	0	FALSE	112.849	65	23	27	180	23	502	54.3	8.16	453.36	23	0	1.728	1.902	1.103	0.0448683	0.786211	0.936415	20.48	17.18	19.7	142	85.2	72.7				2.87386e+07	1.72471e+07	1.47165e+07	High	High	High	1
FALSE	High	Master Protein	P14_v1_320022	ID:109592158 tgt| tRNA-guanine transglycosylase [Pseudomonas sp. P14]	0	FALSE	112.486	72	21	24	119	21	377	42	7.34	347.22	21	0	0.937	0.821	0.833	0.989882	0.751931	0.866501	15.01	41.83	40.78	91.1	97.5	111.4				8.76067e+06	9.36968e+06	1.07084e+07	High	High	High	1
FALSE	High	Master Protein	P15636	SWISS-PROT:P15636 Protease I precursor Lysyl endopeptidase Achromobacter lyticus.	0	TRUE	112.296	18	9	24	167	9	653	68.1	7.24	621.74	9	0	0.884	1.877	1.972	0.984666	0.79161	0.896324	10.3	29.67	22.69	115.5	124.7	59.8				6.67463e+07	7.21178e+07	3.45724e+07	High	High	High	1
FALSE	High	Master Protein	P14_v1_420024	ID:109592574 ggt| Glutathione hydrolase proenzyme [Pseudomonas sp. P14]	0	FALSE	112.129	45	22	26	178	22	555	59.8	6.14	523.72	22	0	0.838	0.416	0.51	0.951676	0.0226146	0.206235	10	30.21	38.4	67.3	81.8	151				2.26955e+07	2.75895e+07	5.09567e+07	High	High	High	1
FALSE	High	Master Protein	P14_v1_410012	ID:109592528 accA| Biotin carboxylase / Biotin carboxyl carrier protein [Pseudomonas sp. P14]	0	FALSE	112.079	52	24	26	117	24	650	69.7	5.83	341.17	24	0	1.014	0.653	0.606	0.984666	0.427668	0.580553	26.23	29.27	48.99	82	79.7	138.4				5.33949e+06	5.18936e+06	9.01381e+06	High	High	High	1	Met-loss [N-Term]
FALSE	High	Master Protein	P14_v1_120070	ID:109590932 glyceraldehyde-3-phosphate dehydrogenase (NADP+) [Pseudomonas sp. P14]	0	FALSE	111.978	51	25	26	116	25	539	60	6.34	332.16	25	0	0.169	1.095	6.043	2.25823e-13	0.989781	0.0226866	15.59	26.21	35.21	37.5	227	35.6				4.75906e+06	2.88315e+07	4.51928e+06	High	High	High	1
FALSE	High	Master Protein	P14_v1_330013	ID:109592202 PhoH-like ATPase [Pseudomonas sp. P14]	0	FALSE	111.829	57	15	20	189	15	464	51.8	5.87	595.51	15	0	0.7	2.392	3.039	0.668918	0.385727	0.464595	9.46	29.63	30.37	105.6	153.8	40.6				2.08897e+07	3.04086e+07	8.02509e+06	High	High	High	1
FALSE	High	Master Protein	P14_v1_1560003	ID:109594741 protein of unknown function [Pseudomonas sp. P14]	0	FALSE	111.47	56	24	28	88	21	473	53.6	8.25	250.91	24	3	0.896	0.53	0.583	0.95737	0.174424	0.523808	16.85	35.56	38.07	65.5	81.2	153.3				3.98326e+06	4.93471e+06	9.31551e+06	High	High	High	1
FALSE	High	Master Protein	P14_v1_280045	ID:109591962 Acetylornithine deacetylase/Succinyl-diaminopimelate desuccinylase [Pseudomonas sp. P14]	0	FALSE	111.087	62	25	30	113	25	576	62.6	6.04	322.81	25	0	0.804	1.927	2.633	0.92542	0.76945	0.636523	17.45	34.32	21.26	88.4	103.9	107.8				1.73821e+07	2.0426e+07	2.11914e+07	High	High	High	1
FALSE	High	Master Protein	P14_v1_440026	ID:109592654 Aminoglycoside phosphotransferase domain-containing protein [Pseudomonas sp. P14]	0	FALSE	110.871	52	17	24	121	17	520	58	5.63	405.77	17	0	0.93	1.887	2.124	0.999405	0.787916	0.862968	9.32	24.74	14.07	115.6	122.3	62.1				1.9447e+07	2.05661e+07	1.04409e+07	High	High	High	1
FALSE	High	Master Protein	P14_v1_190010	ID:109591387 gpmM| 2,3-bisphosphoglycerate-independent phosphoglycerate mutase [Pseudomonas sp. P14]	0	FALSE	110.73	58	20	26	169	20	511	55.1	5.21	537.11	20	0	0.783	1.136	1.478	0.898103	0.975244	0.989417	20.31	46.93	58.54	77.5	142.1	80.3				1.44663e+07	2.65239e+07	1.49942e+07	High	High	High	1
FALSE	High	Master Protein	P14_v1_470016	ID:109592760 mqo| malate:quinone oxidoreductase [Pseudomonas sp. P14]	0	FALSE	110.668	57	22	27	85	17	545	59.9	6.55	208.84	22	0	0.065	0.628	20.603	1.64131e-16	0.72526	1.74712e-07	26.21	0	122.89	7.4	287.7	5				421292	1.6476e+07	285218	High	High	Peak Found	1
FALSE	High	Master Protein	P35908	SWISS-PROT:P35908 Tax_Id=9606 Gene_Symbol=KRT2 Keratin, type II cytoskeletal 2 epidermal	0	TRUE	110.456	39	31	32	125	18	645	65.8	8	281.3	31	11	0.627	1.02	1.46	0.372001	0.924081	0.995257	20.32	30.37	44.8	89.1	129.1	81.8				1.57025e+07	2.27572e+07	1.44189e+07	High	High	High	1
FALSE	High	Master Protein	P14_v1_10002	ID:109589018 two-component system, chemotaxis family, sensor kinase Cph1 [Pseudomonas sp. P14]	0	FALSE	110.262	40	23	26	74	23	847	91.7	6.38	210.22	23	0	1.168	0.832	0.691	0.830071	0.85161	0.74709	17.11	25.75	25.18	98.4	88.1	113.5				4.62185e+06	4.13822e+06	5.32787e+06	High	High	High	1
FALSE	High	Master Protein	P14_v1_130066	ID:109591011 purM| phosphoribosylformylglycinamide cyclo-ligase [Pseudomonas sp. P14]	0	FALSE	110.18	68	14	19	188	14	352	36.9	4.98	685.25	14	0	1.005	1.504	1.341	0.962994	0.961686	0.989359	15.84	25.84	38.37	116.8	109	74.2				5.60201e+07	5.22569e+07	3.55849e+07	High	High	High	1
FALSE	High	Master Protein	P14_v1_370043	ID:109592398 ftsZ| cell division protein FtsZ [Pseudomonas sp. P14]	0	FALSE	109.992	62	20	27	151	20	398	41.8	5.1	439.22	20	0	1.069	1.249	1.084	0.92833	0.994565	0.93347	13.91	18.34	26.2	108.7	99.4	92				2.3573e+07	2.15491e+07	1.99422e+07	High	High	High	1
FALSE	High	Master Protein	P14_v1_370034	ID:109592389 murF| D-alanyl-D-alanine-adding enzyme [Pseudomonas sp. P14]	0	FALSE	109.606	63	17	23	115	17	455	46.8	6.54	341.45	17	0	0.984	1.577	1.656	0.984666	0.929243	0.93347	16.99	32.24	29.26	109.6	112	78.4				1.07871e+07	1.10179e+07	7.71195e+06	High	High	High	1
FALSE	High	Master Protein	P14_v1_530024	ID:109592983 Imelysin [Pseudomonas sp. P14]	0	FALSE	109.409	68	20	27	132	20	354	38.4	6.43	420.47	20	0	0.958	1.631	1.818	0.985193	0.918265	0.93347	16.94	25.96	28.19	113.1	117	69.9				2.21015e+07	2.28607e+07	1.36516e+07	High	High	High	1
FALSE	High	Master Protein	P14_v1_740009	ID:109593598 ilvE| Branched-chain-amino-acid aminotransferase [Pseudomonas sp. P14]	0	FALSE	109.289	81	19	24	230	19	345	37.3	7.2	746.26	19	0	0.836	0.935	1.123	0.951522	0.864199	0.943265	14.3	27.25	23.1	98.5	115.9	85.6				8.77157e+07	1.03197e+08	7.62093e+07	High	High	High	1	Met-loss [N-Term]
FALSE	High	Master Protein	P14_v1_650019	ID:109593362 Long-chain-fatty-acid--CoA ligase [Pseudomonas sp. P14]	0	FALSE	109.274	52	20	26	144	20	560	62.1	5.73	409.81	20	0	0.832	1.433	1.636	0.949397	0.977052	0.970122	12.36	36.18	37.13	101.1	116.8	82				3.1766e+07	3.66916e+07	2.5769e+07	High	High	High	1
FALSE	High	Master Protein	P14_v1_10264	ID:109589280 exported protein of unknown function [Pseudomonas sp. P14]	0	FALSE	109.104	36	26	28	77	26	866	96.3	6.44	210.82	26	0	1.261	0.747	0.64	0.620223	0.716846	0.669955	19.48	37.89	45.3	96.6	77.7	125.7				4.48862e+06	3.61192e+06	5.84144e+06	High	High	High	1
FALSE	High	Master Protein	P14_v1_250052	ID:109591813 peaD| Quinohemoprotein amine dehydrogenase subunit beta [Pseudomonas sp. P14]	0	FALSE	109.021	70	17	22	112	17	373	41.6	8.66	353.73	17	0	18.887	2.851	0.19	1.64131e-16	0.191131	0.00348995	17.86	45.48	21.33	226.8	10.7	62.5				3.92699e+07	1.85997e+06	1.08135e+07	High	High	High	1
FALSE	High	Master Protein	P14_v1_630004	ID:109593285 ABC transporter substrate-binding protein [Pseudomonas sp. P14]	0	FALSE	108.716	61	19	24	170	19	354	38.6	6.14	552.26	19	0	1.278	0.829	0.601	0.579748	0.719126	0.370281	13.38	20.86	31.83	100.2	73.4	126.4				1.02906e+08	7.54517e+07	1.29885e+08	High	High	High	1
FALSE	High	Master Protein	P14_v1_130039	ID:109590984 fpr| Ferredoxin--NADP reductase [Pseudomonas sp. P14]	0	FALSE	108.345	86	18	27	248	18	259	29.7	5.39	676.13	18	0	0.643	1.026	1.565	0.444997	0.931087	0.976549	16.9	31.4	38.4	83.5	133.1	83.5				3.18115e+07	5.07024e+07	3.18071e+07	High	High	High	1
FALSE	High	Master Protein	P14_v1_360016	ID:109592330 oprD| Porin D [Pseudomonas sp. P14]	0	FALSE	108.24	49	21	29	288	20	427	46.1	5.06	835.79	21	1	0.898	0.302	0.367	0.984666	0.00124059	0.0434191	19.48	35.44	34.94	52.5	62.7	184.9				2.32219e+08	2.77348e+08	8.18199e+08	High	High	High	1
FALSE	High	Master Protein	P14_v1_180020	ID:109591328 sthA| soluble pyridine nucleotide transhydrogenase [Pseudomonas sp. P14]	0	FALSE	108.194	48	20	26	145	20	464	50.9	7.59	421.8	20	0	2.397	4.349	1.746	0.000226756	0.0105084	0.944122	19.68	24.87	29.73	180.4	75.1	44.5				6.86537e+07	2.85865e+07	1.69508e+07	High	High	High	1
FALSE	High	Master Protein	P14_v1_120042	ID:109590904 bdlA| Biofilm dispersion protein BdlA [Pseudomonas sp. P14]	0	FALSE	108.049	68	24	25	102	22	439	48.6	6.8	272.06	24	1	0.977	0.976	0.991	0.986584	0.916431	0.941597	22.15	18.65	40.04	104.6	100	95.4				9.63233e+06	9.2136e+06	8.78445e+06	High	High	High	1
FALSE	High	Master Protein	P14_v1_380012	ID:109592411 multiphosphoryl transfer protein [Pseudomonas sp. P14]	0	FALSE	107.513	34	26	29	66	26	950	101.5	5.12	176.75	26	0	0.636	0.763	1.324	0.1331	0.787916	0.975856	30.05	37.77	34.57	77.7	123.1	99.2				2.53785e+06	4.02206e+06	3.241e+06	High	High	High	1
FALSE	High	Master Protein	P14_v1_840007	ID:109593869 CBS domain-containing protein [Pseudomonas sp. P14]	0	FALSE	107.408	48	25	27	51	25	645	72.4	7.5	155.81	25	0	11.871	27.147	2.205	1.64131e-16	5.9969e-14	0.540914	18.82	55.3	49.56	284.2	14.1	1.7				1.00249e+07	498702	60212.1	High	High	High	1
FALSE	High	Master Protein	P14_v1_170067	ID:109591308 tyrS| Tyrosine--tRNA ligase [Pseudomonas sp. P14]	0	FALSE	107.408	60	22	26	177	22	399	44.3	5.81	480.61	22	0	0.768	1.489	1.712	0.883229	0.964781	0.951177	16.87	28.26	32.25	98.5	131	70.6				2.9358e+07	3.90583e+07	2.10385e+07	High	High	High	1
FALSE	High	Master Protein	P14_v1_170028	ID:109591269 yeaH| DUF444 domain-containing protein YeaH [Pseudomonas sp. P14]	0	FALSE	107.381	58	22	25	115	22	423	48.7	6.98	330.78	22	0	1.095	3.002	2.558	0.904505	0.147213	0.671	16.95	38.42	44.54	129	121	50.1				2.37547e+07	2.22814e+07	9.22339e+06	High	High	High	1
FALSE	High	Master Protein	P14_v1_940011	ID:109594118 adk| adenylate kinase [Pseudomonas sp. P14]	0	FALSE	106.485	73	17	23	219	17	216	23.2	5.88	606.5	17	0	1.685	1.271	0.661	0.0603995	0.999657	0.477531	27.51	40	51.18	123.7	69.4	106.9				9.47054e+07	5.31301e+07	8.18677e+07	High	High	High	1
FALSE	High	Master Protein	P14_v1_930007	ID:109594093 nuoF| NADH:quinone oxidoreductase subunit F [Pseudomonas sp. P14]	0	FALSE	106.424	62	22	25	146	22	453	49.1	7.33	399.21	22	0	1.063	1.412	1.379	0.929095	0.981606	0.997122	26.41	45.98	31.95	106.1	115.9	78				2.42979e+07	2.65204e+07	1.78527e+07	High	High	High	1	Met-loss [N-Term]
FALSE	High	Master Protein	P14_v1_1400001	ID:109594666 protein of unknown function [Pseudomonas sp. P14]	0	FALSE	106.397	20	29	29	38	27	2125	233.4	5.76	123	29	2	2.292	0.326	0.098	0.00882018	0.0275694	7.96021e-08	68.11	29.33	4.88	57.6	17.1	225.3				668883	198778	2.61465e+06	High	Peak Found	High	1
FALSE	High	Master Protein	P14_v1_320046	ID:109592182 der| 50S ribosomal subunit stability factor [Pseudomonas sp. P14]	0	FALSE	105.588	52	22	25	124	22	487	54.1	8.72	325.97	22	0	0.883	1.019	1.152	0.984666	0.919793	0.94892	13.62	19.81	34.3	97.2	107.9	94.8				1.41816e+07	1.57437e+07	1.38279e+07	High	High	High	1
FALSE	High	Master Protein	P14_v1_30144	ID:109589776 cynT| carbonic anhydrase 1 [Pseudomonas sp. P14]	0	FALSE	105.548	92	15	22	248	15	239	26	6.79	668.02	15	0	1.202	1.975	1.567	0.745571	0.732698	0.976549	20.32	23.38	36.95	135.7	111	53.4				6.44545e+07	5.27156e+07	2.53496e+07	High	High	High	1
FALSE	High	Master Protein	P14_v1_270003	ID:109591870 ABC-type branched-chain amino acid transport [Pseudomonas sp. P14]	0	FALSE	105.118	62	20	23	85	20	397	43.3	8.25	250.65	20	0	13.856	0.16	0.01	1.64131e-16	4.40796e-07	1.15948e-16	17.24	32.05	52.31	40	1.4	258.7				4.97896e+06	173277	3.22292e+07	High	High	High	1
FALSE	High	Master Protein	P35527	SWISS-PROT:P35527 Tax_Id=9606 Gene_Symbol=KRT9 Keratin, type I cytoskeletal 9	0	TRUE	105.015	42	21	24	107	20	623	62.1	5.3	244.51	21	0	0.363	0.957	2.432	8.70816e-05	0.941818	0.645573	26.21	39.84	26.24	60.5	172.6	66.9				5.07823e+06	1.44924e+07	5.62067e+06	High	High	High	1
FALSE	High	Master Protein	P14_v1_170007	ID:109591248 S9 family peptidase [Pseudomonas sp. P14]	0	FALSE	105.006	49	21	26	86	21	607	66.9	5.74	242.38	21	0	2.982	0.231	0.082	1.03483e-06	5.35931e-05	1.46874e-06	27.74	33.37	55.79	45.4	13.2	241.3				3.20783e+06	935073	1.70329e+07	High	High	High	1
FALSE	High	Master Protein	P14_v1_650013	ID:109593356 Response regulator [Pseudomonas sp. P14]	0	FALSE	104.873	50	25	26	80	25	535	59.3	8.28	237.83	25	0	0.736	0.728	1.041	0.555658	0.687274	0.972265	23.49	19.59	45.57	78.7	102.4	118.9				3.54414e+06	4.61306e+06	5.3532e+06	High	High	High	1
FALSE	High	Master Protein	P14_v1_410009	ID:109592525 acdA| Acyl-CoA dehydrogenase [Pseudomonas sp. P14]	0	FALSE	104.788	60	16	21	111	16	387	42.5	6.15	330.93	16	0	1.085	0.669	0.597	0.947614	0.45825	0.568904	28.53	22.8	37.31	88.6	76.2	135.2				5.90239e+06	5.07529e+06	9.01164e+06	High	High	High	1
FALSE	High	Master Protein	P14_v1_770023	ID:109593707 HemY protein [Pseudomonas sp. P14]	0	FALSE	104.678	55	25	26	110	25	412	46	9.29	317.43	25	0	1.013	0.967	0.987	0.961111	0.890393	0.906027	14.38	15.78	44.43	101.8	95.3	103				1.3153e+07	1.23172e+07	1.33073e+07	High	High	High	1
FALSE	High	Master Protein	P14_v1_610027	ID:109593234 yfmJ| putative NADP-dependent oxidoreductase YfmJ [Pseudomonas sp. P14]	0	FALSE	104.66	76	19	22	166	19	333	35.8	7.3	513.85	19	0	1.024	1.08	1.078	0.954962	0.954618	0.93347	13.04	22.91	22.39	104.3	97.8	97.9				2.48633e+07	2.33272e+07	2.33499e+07	High	High	High	1
FALSE	High	Master Protein	P14_v1_280009	ID:109591926 yhgF| putative RNA-binding protein YhgF [Pseudomonas sp. P14]	0	FALSE	104.625	40	25	33	112	25	774	84.6	6.67	285.13	25	0	0.751	1.756	2.367	0.656459	0.794366	0.617623	16.88	16.73	26.18	105	139	56				5.96818e+06	7.90257e+06	3.18205e+06	High	High	High	1
FALSE	High	Master Protein	P14_v1_300022	ID:109592048 two-component system, chemotaxis family, sensor kinase CheA [Pseudomonas sp. P14]	0	FALSE	104.392	32	19	21	91	19	747	79.5	4.78	312.43	19	0	0.968	0.638	0.622	0.994001	0.363968	0.579011	17.1	25.94	39.85	85.9	94.5	119.6				7.93921e+06	8.73001e+06	1.1058e+07	High	High	High	1
FALSE	High	Master Protein	P14_v1_230041	ID:109591670 zwf| NADP(+)-dependent glucose-6-phosphate dehydrogenase [Pseudomonas sp. P14]	0	FALSE	104.166	47	22	23	132	22	489	55	6.76	344.44	22	0	0.051	0.435	8.606	1.64131e-16	0.0545214	0.00202666	16.05	21.11	52.82	12.8	256.5	30.7				3.78805e+06	7.58339e+07	9.08953e+06	High	High	High	1	Met-loss [N-Term]
FALSE	High	Master Protein	P14_v1_770018	ID:109593702 argH| Argininosuccinate lyase [Pseudomonas sp. P14]	0	FALSE	103.783	46	23	23	144	23	464	51.6	5.76	430.26	23	0	0.847	1.528	1.796	0.957703	0.954618	0.93653	20.37	38.69	54.42	101.6	126.7	71.7				2.01348e+07	2.51127e+07	1.4219e+07	High	High	High	1
FALSE	High	Master Protein	P14_v1_110075	ID:109590842 gdhA| glutamate dehydrogenase [Pseudomonas sp. P14]	0	FALSE	103.735	61	19	22	120	19	446	48.5	6.55	325.71	19	0	1.562	0.605	0.356	0.125274	0.229001	0.0565097	15.44	30.97	29.3	88.9	55	156.1				1.04793e+07	6.48943e+06	1.84074e+07	High	High	High	1
FALSE	High	Master Protein	P14_v1_680008	ID:109593445 serS| serine--tRNA ligase [Pseudomonas sp. P14]	0	FALSE	103.64	44	19	25	198	19	426	46.8	5.4	647.25	19	0	0.882	1.514	1.65	0.984463	0.95788	0.966503	16.63	16.27	27.49	110.3	114.4	75.2				4.40491e+07	4.56873e+07	3.00224e+07	High	High	High	1
FALSE	High	Master Protein	P14_v1_1260002	ID:109594559 leuB| 3-isopropylmalate dehydrogenase [Pseudomonas sp. P14]	0	FALSE	103.561	57	18	20	199	18	360	38.8	5.17	566.83	18	0	1.089	1.93	1.912	0.908539	0.767964	0.912542	14.97	37.97	38.27	126.5	115.9	57.6				5.21576e+07	4.77594e+07	2.37507e+07	High	High	High	1
FALSE	High	Master Protein	P14_v1_460018	ID:109592721 fumC| Fumarate hydratase class II 2 [Pseudomonas sp. P14]	0	FALSE	103.2	45	16	24	91	16	458	48.4	6.19	351.86	16	0	2.044	0.331	0.158	0.00135819	0.00305215	7.31058e-05	11.9	22.7	16.07	67.3	22	210.7				8.13779e+06	2.66165e+06	2.54781e+07	High	High	High	1
FALSE	High	Master Protein	P14_v1_1250002	ID:109594555 phthiocerol/phenolphthiocerol synthesis type-I polyketide synthase C [Pseudomonas sp. P14]	0	FALSE	103.144	16	30	31	55	30	2499	269.1	5.45	138.24	30	0	1.949	0.4	0.232	0.0304785	0.070149	0.0128639	26.3	35.62	37.06	59.7	36.7	203.6				1.15292e+06	709393	3.93541e+06	High	High	High	1
FALSE	High	Master Protein	P14_v1_1040004	ID:109594296 ghrB| glyoxylate reductase [Pseudomonas sp. P14]	0	FALSE	103.06	68	19	22	123	19	320	34.5	6.33	377.41	19	0	0.01	1.512	100	1.64131e-16	0.875309	1.15948e-16	73.91	87.51	0.92	0.7	298.9	0.4				208778	8.49084e+07	115008	High	High	High	1
FALSE	High	Master Protein	P14_v1_250053	ID:109591814 yngI| putative acyl-CoA synthetase YngI [Pseudomonas sp. P14]	0	FALSE	102.97	53	21	22	71	18	562	61.7	6.16	221.29	21	3	5.932	1.991	0.242	1.64131e-16	0.696392	0.0147051	34.4	26.75	21.92	189.2	11.1	99.7				1.30647e+07	769577	6.88628e+06	High	High	High	1
FALSE	High	Master Protein	P14_v1_10267	ID:109589283 Exopolysaccharide transport protein [Pseudomonas sp. P14]	0	FALSE	102.639	43	25	27	107	25	520	58.1	8.87	300.97	25	0	1.395	1.04	0.706	0.341012	0.941308	0.557397	17.69	29.18	37.42	110.1	76.4	113.4				1.8889e+07	1.31088e+07	1.94509e+07	High	High	High	1
FALSE	High	Master Protein	P14_v1_20049	ID:109589442 aidB| putative acyl-CoA dehydrogenase AidB [Pseudomonas sp. P14]	0	FALSE	102.621	67	24	25	73	24	550	59.8	6.57	236.11	24	0	1.249	0.821	0.688	0.662843	0.804571	0.721031	21.75	25.4	25.74	98	85.4	116.6				5.59188e+06	4.87678e+06	6.65665e+06	High	High	High	1	Met-loss [N-Term]
FALSE	High	Master Protein	P14_v1_10203	ID:109589219 codA| cytosine/isoguanine deaminase [Pseudomonas sp. P14]	0	FALSE	102.45	61	18	22	95	18	413	45.9	6.14	292.76	18	0	0.81	1.113	1.177	0.904505	0.976459	0.976549	28.37	22.18	34.42	91.6	110.9	97.6				9.39053e+06	1.13708e+07	1.00084e+07	High	High	High	1
FALSE	High	Master Protein	P14_v1_320027	ID:109592163 suhB| inositol-phosphate phosphatase [Pseudomonas sp. P14]	0	FALSE	101.835	65	20	23	128	20	272	29.7	6.65	342.9	20	0	1.037	1.33	1.24	0.950677	0.992664	0.975137	12.94	36.79	51.29	104.9	103.5	91.6				2.5329e+07	2.50069e+07	2.21315e+07	High	High	High	1
FALSE	High	Master Protein	P14_v1_40028	ID:109589870 Carboxynorspermidine synthase [Pseudomonas sp. P14]	0	FALSE	101.243	63	21	22	145	21	414	45.3	5.33	421.66	21	0	0.613	1.684	2.635	0.31797	0.901804	0.636523	16.76	25.8	19.2	91.8	153.3	54.8				2.14362e+07	3.57924e+07	1.27926e+07	High	High	High	1
FALSE	High	Master Protein	P14_v1_210017	ID:109591518 mcpA| Methyl-accepting chemotaxis protein McpA [Pseudomonas sp. P14]	0	FALSE	101.096	49	21	22	81	20	628	66.9	5.24	252.27	21	0	0.927	0.695	0.852	0.984666	0.497051	0.885996	15.9	31.13	31.29	82.1	99.1	118.7				7.05511e+06	8.51479e+06	1.01975e+07	High	High	High	1
FALSE	High	Master Protein	P14_v1_410004	ID:109592520 glgB| 1,4-alpha-glucan branching enzyme [Pseudomonas sp. P14]	0	FALSE	101.057	32	20	22	129	20	736	82.9	5.95	326.99	20	0	1.123	1.234	0.998	0.883489	0.992664	0.920827	11.32	27.67	33.39	112.1	95.5	92.3				1.47615e+07	1.25817e+07	1.216e+07	High	High	High	1
FALSE	High	Master Protein	P14_v1_560004	ID:109593059 mcpG| Methyl-accepting chemotaxis protein McpG [Pseudomonas sp. P14]	0	FALSE	100.925	41	21	22	93	20	624	67.6	5.12	282.97	21	0	0.928	0.683	0.742	0.984463	0.479129	0.747875	22.62	23.62	25.59	77.2	97.1	125.7				5.86321e+06	7.37957e+06	9.55141e+06	High	High	High	1
FALSE	High	Master Protein	P14_v1_320031	ID:109592167 iscS| cysteine desulfurase IscS [Pseudomonas sp. P14]	0	FALSE	100.619	60	22	26	135	22	404	44.4	6.25	402.6	22	0	0.851	0.505	0.627	0.958614	0.0893971	0.413174	13.34	33.33	38.6	76.4	94	129.6				2.00982e+07	2.47207e+07	3.40758e+07	High	High	High	1
FALSE	High	Master Protein	P14_v1_640020	ID:109593330 sseA| putative 3-mercaptopyruvate sulfurtransferase [Pseudomonas sp. P14]	0	FALSE	100.39	75	20	25	116	20	284	30.8	5.81	339.03	20	0	0.901	2.381	2.523	0.984666	0.374119	0.636523	14.92	35.02	34.87	119.3	133.1	47.6				1.50066e+07	1.67395e+07	5.99415e+06	High	High	High	1	Met-loss [N-Term]
FALSE	High	Master Protein	P14_v1_1300005	ID:109594596 carboxymethylenebutenolidase [Pseudomonas sp. P14]	0	FALSE	100.246	54	14	20	145	14	263	28.5	6.8	463.86	14	0	1.072	2.357	2.142	0.927406	0.443567	0.848663	36.25	33.6	62.91	119	134	47				2.39042e+07	2.69046e+07	9.43212e+06	High	High	High	1
FALSE	High	Master Protein	P14_v1_1020003	ID:109594260 metK| methionine adenosyltransferase [Pseudomonas sp. P14]	0	FALSE	100.008	62	14	19	215	14	396	42.8	5.49	763.54	14	0	1.066	1.149	1.085	0.92833	0.976559	0.93347	18.81	27.74	29.21	102.1	102.8	95.1				6.91854e+07	6.96955e+07	6.44292e+07	High	High	High	1	Met-loss [N-Term]
FALSE	High	Master Protein	P14_v1_540008	ID:109593003 hyuC| N-carbamoyl-L-amino-acid hydrolase [Pseudomonas sp. P14]	0	FALSE	99.639	59	18	22	126	17	427	44.9	5.86	361.85	18	1	1.143	5.755	4.617	0.863129	0.000463281	0.0603483	10.63	32.96	14.26	144.8	131.5	23.7				1.48236e+07	1.3457e+07	2.43102e+06	High	High	High	1
FALSE	High	Master Protein	P14_v1_290010	ID:109591983 TRAP transporter solute receptor [Pseudomonas sp. P14]	0	FALSE	99.552	74	20	22	143	20	316	33.3	8.87	456.45	20	0	0.998	0.388	0.386	0.973118	0.0126874	0.0573209	20.83	21.63	31.14	62.1	66.8	171.1				3.06419e+07	3.29968e+07	8.44868e+07	High	High	High	1
FALSE	High	Master Protein	P14_v1_20185	ID:109589578 parC| DNA topoisomerase IV subunit A [Pseudomonas sp. P14]	0	FALSE	99.55	38	25	27	86	25	752	83.1	6.25	270.75	25	0	0.777	1.225	1.485	0.831647	0.999657	0.959397	24.69	16.55	25.31	103.3	120	76.7				7.82973e+06	9.09775e+06	5.80928e+06	High	High	High	1	Met-loss [N-Term]
FALSE	High	Master Protein	P14_v1_590021	ID:109593170 UDP-N-acetylglucosamine 2-epimerase (non-hydrolysing) [Pseudomonas sp. P14]	0	FALSE	99.531	58	19	22	160	19	376	42.5	6.54	457.94	19	0	0.824	0.875	1.115	0.944855	0.787947	0.939616	19.14	40.45	41.39	86.5	109.8	103.7				2.51173e+07	3.19038e+07	3.01154e+07	High	High	High	1
FALSE	High	Master Protein	P14_v1_690011	ID:109593476 pgm| phosphoglucomutase [Pseudomonas sp. P14]	0	FALSE	99.187	45	19	23	117	19	545	58.6	5.9	285.21	19	0	0.904	1.133	1.192	0.985193	0.975244	0.962298	15.73	32.34	21.72	99.1	110.2	90.7				1.40048e+07	1.5578e+07	1.28122e+07	High	High	High	1
FALSE	High	Master Protein	P14_v1_20092	ID:109589485 purH| bifunctional AICAR transformylase/IMP cyclohydrolase [Pseudomonas sp. P14]	0	FALSE	99.044	43	22	24	170	22	535	57.7	6.49	501.06	22	0	0.874	1.722	2.084	0.979569	0.885687	0.867419	12.66	23.27	26.69	106.7	129.5	63.8				3.46283e+07	4.2027e+07	2.07013e+07	High	High	High	1
FALSE	High	Master Protein	P14_v1_590026	ID:109593175 Polysaccharide biosynthesis protein CapD [Pseudomonas sp. P14]	0	FALSE	98.747	38	20	22	83	20	666	74.1	7.09	224.78	20	0	1.001	1.08	1.02	0.984666	0.982685	0.964686	24.95	26.77	28.69	98.1	127.9	74				5.7704e+06	7.5273e+06	4.35673e+06	High	High	High	1
FALSE	High	Master Protein	P14_v1_1010001	ID:109594243 oprD| Porin D [Pseudomonas sp. P14]	0	FALSE	98.622	54	16	22	112	15	439	47.8	6.2	336.15	16	0	1.064	1.976	2.028	0.92833	0.668768	0.85358	34.53	64.98	44.3	124.4	119.2	56.4				1.67416e+07	1.60489e+07	7.58866e+06	High	High	High	1
FALSE	High	Master Protein	P14_v1_60054	ID:109590248 epd| D-erythrose-4-phosphate dehydrogenase [Pseudomonas sp. P14]	0	FALSE	98.606	69	18	23	194	17	337	36.3	5.83	520.35	18	1	0.206	0.01	0.01	5.56157e-11	1.38203e-16	1.15948e-16	96.77	107.28	27.03	0.3	2	297.7				262628	1.56441e+06	2.37244e+08	High	High	High	1
FALSE	High	Master Protein	P14_v1_300051	ID:109592077 purF| amidophosphoribosyltransferase [Pseudomonas sp. P14]	0	FALSE	98.377	55	19	21	126	19	501	55.4	6.49	394.77	19	0	0.771	1.933	2.058	0.890929	0.765884	0.879164	12.3	35.83	35.35	106	135.3	58.6				2.79348e+07	3.56643e+07	1.54544e+07	High	High	High	1	Met-loss [N-Term]
FALSE	High	Master Protein	P14_v1_320001	ID:109592137 alaC| glutamate--pyruvate aminotransferase AlaC [Pseudomonas sp. P14]	0	FALSE	98.17	58	21	22	80	21	402	44.9	7.91	220.19	21	0	1.41	0.722	0.518	0.31797	0.487225	0.375023	27.36	42.9	36.97	97.8	65.9	136.3				1.05007e+07	7.06993e+06	1.46301e+07	High	High	High	1
FALSE	High	Master Protein	P14_v1_280029	ID:109591946 tcyJ| cystine ABC transporter periplasmic binding protein [Pseudomonas sp. P14]	0	FALSE	98.149	73	20	23	161	20	264	28.8	8.53	508	20	0	1.09	1.223	1.112	0.907811	0.990397	0.938608	8.64	27.18	15.38	113.4	103	83.5				7.57608e+07	6.88408e+07	5.58105e+07	High	High	High	1
FALSE	High	Master Protein	P14_v1_20048	ID:109589441 amn| AMP nucleosidase [Pseudomonas sp. P14]	0	FALSE	98.1	50	19	19	127	19	487	54.4	6.81	331.26	19	0	0.946	1.487	1.576	0.990517	0.956391	0.94892	24.29	23.84	22.4	104.3	118.1	77.6				1.11822e+07	1.26602e+07	8.32258e+06	High	High	High	1
FALSE	High	Master Protein	P14_v1_900002	ID:109594009 pyrB| Aspartate carbamoyltransferase catalytic subunit [Pseudomonas sp. P14]	0	FALSE	97.943	79	20	21	134	20	334	36.3	7.06	377.26	20	0	0.919	2.017	2.063	0.994001	0.636816	0.864896	20.92	28.15	29.3	120	132.8	47.2				1.81511e+07	2.00803e+07	7.14638e+06	High	High	High	1
FALSE	High	Master Protein	P14_v1_1280007	ID:109594579 minD| Z-ring positioning protein MinD [Pseudomonas sp. P14]	0	FALSE	97.902	64	17	24	167	17	270	29.6	6.28	458.25	17	0	1.099	1.29	1.223	0.902239	0.999657	0.971401	31.27	40.41	42.23	115	97.7	87.4				4.30014e+07	3.65383e+07	3.26825e+07	High	High	High	1
FALSE	High	Master Protein	P14_v1_80105	ID:109590568 Aspartate kinase [Pseudomonas sp. P14]	0	FALSE	97.695	49	19	23	257	19	411	44.6	5.38	664.03	19	0	0.906	2.001	2.112	0.986344	0.709968	0.855376	17.44	11.91	26.64	115	129	56				9.88143e+07	1.10821e+08	4.81053e+07	High	High	High	1
FALSE	High	Master Protein	P14_v1_50073	ID:109590100 Pentapeptide repeat family protein [Pseudomonas sp. P14]	0	FALSE	97.584	70	15	27	216	15	219	23.6	5.66	615.91	15	0	24.648	0.15	0.01	1.64131e-16	1.75222e-07	1.15948e-16	25.33	25	42.67	36.6	1.9	261.4				7.78771e+07	4.11572e+06	5.55801e+08	High	High	High	1
FALSE	High	Master Protein	P14_v1_850021	ID:109593904 gor| Glutathione reductase [Pseudomonas sp. P14]	0	FALSE	97.384	53	15	24	159	15	451	49.2	5.48	388.4	15	0	0.928	1.319	1.435	0.998098	0.990397	0.986222	15.61	24.75	38.4	104.5	116.1	79.5				1.30555e+07	1.45072e+07	9.93005e+06	High	High	High	1
FALSE	High	Master Protein	P14_v1_450008	ID:109592674 puuA| glutamate-putrescine ligase [Pseudomonas sp. P14]	0	FALSE	97.316	46	15	19	110	15	458	50.9	4.91	367.54	15	0	1.128	1.007	0.838	0.880241	0.915815	0.767762	12.29	24.44	14.58	105	91.5	103.5				1.47674e+07	1.28744e+07	1.45689e+07	High	High	High	1
FALSE	High	Master Protein	P14_v1_420025	ID:109592575 mcpS| Methyl-accepting chemotaxis protein McpS [Pseudomonas sp. P14]	0	FALSE	97.249	46	21	23	63	19	639	68.7	5.15	186.19	21	0	0.33	0.457	1.568	9.84855e-08	0.183737	0.924767	18.43	17.2	31.05	51.8	147.3	100.8				1.66396e+06	4.73066e+06	3.23813e+06	High	High	High	1
FALSE	High	Master Protein	P14_v1_390038	ID:109592465 hutU| Urocanate hydratase [Pseudomonas sp. P14]	0	FALSE	97.103	51	22	23	78	22	557	60.6	5.92	218.3	22	0	1.253	11.265	6.989	0.634955	7.61082e-08	0.00569281	16.39	26.26	55.16	155.2	118.2	26.6				1.37049e+07	1.04322e+07	2.34845e+06	High	High	High	1
FALSE	High	Master Protein	P14_v1_400035	ID:109592500 ansB| Glutaminase-asparaginase [Pseudomonas sp. P14]	0	FALSE	96.915	49	19	26	110	19	362	38.6	7.59	334.47	19	0	1.78	0.869	0.555	0.0308865	0.787776	0.283149	13.95	28.16	32.16	111.2	65.7	123.1				2.37494e+07	1.40362e+07	2.62836e+07	High	High	High	1
FALSE	High	Master Protein	P14_v1_180002	ID:109591310 uup| ATP-binding protein Uup [Pseudomonas sp. P14]	0	FALSE	96.749	46	26	29	98	26	642	71.4	5.41	248.49	26	0	0.853	1.493	1.855	0.947614	0.948129	0.855397	22.48	24.94	46.69	109.3	125.5	65.2				8.23787e+06	9.45494e+06	4.91062e+06	High	High	High	1
FALSE	High	Master Protein	P14_v1_430025	ID:109592612 ycgR| Flagellar brake protein YcgR [Pseudomonas sp. P14]	0	FALSE	96.678	77	20	22	111	20	247	28.4	6.67	285.01	20	0	0.916	0.939	1.136	0.991348	0.888328	0.963547	24.37	31.63	52.61	94.2	107.9	97.9				1.12815e+07	1.29306e+07	1.17247e+07	High	High	High	1
FALSE	High	Master Protein	P14_v1_410006	ID:109592522 glgE| Alpha-1,4-glucan:maltose-1-phosphate maltosyltransferase [Pseudomonas sp. P14]	0	FALSE	96.425	41	20	22	79	20	672	76.7	6.05	182.93	20	0	1.326	1.164	0.824	0.482951	0.984595	0.816523	24.81	23.52	36.67	118.7	81.7	99.6				1.38983e+07	9.56712e+06	1.16632e+07	High	High	High	1	Met-loss [N-Term]
FALSE	High	Master Protein	P14_v1_350002	ID:109592279 sbcC| Nuclease SbcCD subunit C [Pseudomonas sp. P14]	0	FALSE	96.411	26	24	24	59	24	1214	136	5.76	163.34	24	0	0.772	1.649	2.258	0.659609	0.788602	0.595988	17.79	35.81	37.44	90.9	159.9	49.3				2.35977e+06	4.15151e+06	1.27997e+06	High	High	High	1
FALSE	High	Master Protein	P14_v1_450034	ID:109592700 rbbA| ribosome-associated ATPase [Pseudomonas sp. P14]	0	FALSE	96.349	36	26	27	67	26	906	98.6	7.85	157.27	26	0	0.819	3.32	4.097	0.870282	0.0543057	0.09598	21.22	23.56	22.79	125.8	151.1	23.1				4.36192e+06	5.24035e+06	799366	High	High	High	1	Met-loss [N-Term]
FALSE	High	Master Protein	P14_v1_550021	ID:109593043 fabB| 3-oxoacyl-[acyl carrier protein] synthase 1 [Pseudomonas sp. P14]	0	FALSE	96.3	60	16	22	247	16	406	43.2	5.62	754.96	16	0	0.849	1.52	1.619	0.958614	0.948129	0.964252	26.86	30.07	32.24	103.4	132.9	63.6				1.40729e+07	1.80851e+07	8.65992e+06	High	High	High	1
FALSE	High	Master Protein	P14_v1_30007	ID:109589639 uvrD| DNA helicase II [Pseudomonas sp. P14]	0	FALSE	96.232	41	24	26	73	23	728	81.6	6.25	196.18	24	1	0.832	0.919	1.109	0.895216	0.919793	0.988477	19.64	28.59	31.46	93.1	109.9	96.9				4.36751e+06	5.1575e+06	4.54738e+06	High	High	High	1
FALSE	High	Master Protein	P14_v1_190018	ID:109591395 betA| choline dehydrogenase [Pseudomonas sp. P14]	0	FALSE	96.162	42	16	22	88	16	565	62.5	6.81	251.2	16	0	1.167	0.866	0.827	0.852044	0.907146	0.898089	42.22	26.78	54.54	112.5	94.6	93				4.52541e+06	3.80475e+06	3.74148e+06	High	High	High	1
FALSE	High	Master Protein	P14_v1_430029	ID:109592616 bkdA| 2-oxoisovalerate dehydrogenase subunit alpha [Pseudomonas sp. P14]	0	FALSE	96.085	62	17	20	125	17	410	45.2	6.11	344.71	17	0	0.995	4.719	4.56	0.975423	0.00496133	0.0866616	13.32	36.69	33.84	134.4	139.7	25.9				1.77122e+07	1.84e+07	3.41077e+06	High	High	High	1
FALSE	High	Master Protein	P14_v1_130032	ID:109590977 AMP nucleosidase [Pseudomonas sp. P14]	0	FALSE	96.068	60	18	27	116	18	372	42.1	6.67	302.33	18	0	0.716	7.868	10.392	0.736517	1.19865e-05	0.000554058	22.9	36.5	39.92	120.7	165.2	14.1				1.54359e+07	2.11139e+07	1.80193e+06	High	High	High	1	Met-loss [N-Term]
FALSE	High	Master Protein	P14_v1_710009	ID:109593520 rpsB| 30S ribosomal subunit protein S2 [Pseudomonas sp. P14]	0	FALSE	96.067	71	16	20	332	16	245	27	8.82	868.24	16	0	0.894	1.371	1.617	0.984666	0.989781	0.972265	18.88	19.21	20.15	103.3	122	74.8				2.3223e+08	2.74361e+08	1.68149e+08	High	High	High	1
FALSE	High	Master Protein	P14_v1_280054	ID:109591971 yheS| putative ATP-binding protein YheS [Pseudomonas sp. P14]	0	FALSE	96.038	43	20	23	72	20	636	70.6	5.91	210.59	20	0	1.129	1.11	0.985	0.904505	0.992686	0.96902	14.77	25.94	32.4	104.5	96.8	98.7				3.35916e+06	3.11236e+06	3.17379e+06	High	High	High	1
FALSE	High	Master Protein	P14_v1_560020	ID:109593075 acrB| multidrug efflux pump RND permease AcrB [Pseudomonas sp. P14]	0	FALSE	95.91	28	24	29	103	23	1050	112.7	5.73	321.4	24	0	0.811	3.038	3.647	0.898103	0.152881	0.18349	22.23	37.78	50.98	115	147.1	37.8				8.12551e+06	1.03928e+07	2.6734e+06	High	High	High	1
FALSE	High	Master Protein	P14_v1_480014	ID:109592795 carA| carbamoyl phosphate synthetase subunit alpha [Pseudomonas sp. P14]	0	FALSE	95.553	54	13	21	152	13	378	40.6	5.91	535.83	13	0	0.911	1.688	1.727	0.989511	0.901804	0.94892	15.14	32.42	34.05	112.8	124.1	63.1				2.709e+07	2.97974e+07	1.51378e+07	High	High	High	1
FALSE	High	Master Protein	P14_v1_150014	ID:109591124 O-acetyl-L-homoserine sulfhydrylase [Pseudomonas sp. P14]	0	FALSE	95.496	61	18	20	152	18	425	45.3	6.35	368.4	18	0	0.881	1.021	1.193	0.984345	0.926838	0.962298	15.67	16.08	32.53	84.8	122	93.2				2.34076e+07	3.36507e+07	2.57079e+07	High	High	High	1
FALSE	High	Master Protein	P14_v1_1900001	ID:109594794 NADH dehydrogenase [Pseudomonas sp. P14]	0	FALSE	95.428	72	19	24	104	19	340	36.6	9.42	269.41	19	0	1.568	0.018	0.012	0.239672	1.38203e-16	1.15948e-16	8.3	32.23	38.01	4.3	2.5	293.2				2.08348e+06	1.20756e+06	1.42467e+08	High	High	High	1
FALSE	High	Master Protein	P14_v1_1570002	ID:109594743 pgk| phosphoglycerate kinase [Pseudomonas sp. P14]	0	FALSE	95.177	69	18	21	174	15	387	40	5.31	507.78	18	0	1.067	1.943	1.996	0.92833	0.759552	0.896324	10.9	21.85	18.14	120.8	119.4	59.9				4.31963e+07	4.26992e+07	2.14122e+07	High	High	High	1
FALSE	High	Master Protein	P14_v1_590020	ID:109593169 wbjC| UDP-2-acetamido-2,6-beta-L-arabino-hexul-4-ose reductase [Pseudomonas sp. P14]	0	FALSE	94.996	59	17	22	156	17	370	41.1	6.24	493.13	17	0	0.817	0.586	0.696	0.937737	0.203178	0.539388	20.68	38.87	59.59	76.7	101.3	122.1				1.60458e+07	2.11872e+07	2.55424e+07	High	High	High	1
FALSE	High	Master Protein	P14_v1_560005	ID:109593060 ATPase component BioM of energizing module of biotin ECF transporter [Pseudomonas sp. P14]	0	FALSE	94.889	52	22	23	97	22	491	52.3	6.57	287.48	22	0	0.832	1.258	1.506	0.949397	0.996599	0.986222	14.73	23.63	26.59	99.8	119.4	80.8				1.73149e+07	2.07039e+07	1.40091e+07	High	High	High	1	Met-loss [N-Term]
FALSE	High	Master Protein	P14_v1_190017	ID:109591394 betB| betaine aldehyde dehydrogenase [Pseudomonas sp. P14]	0	FALSE	94.758	56	20	24	86	20	490	53	5.12	259.45	20	0	1.216	0.997	0.808	0.719963	0.907146	0.757785	9.15	28.22	28.46	107.2	89.7	103.1				1.445e+07	1.20841e+07	1.39009e+07	High	High	High	1
FALSE	High	Master Protein	P14_v1_890002	ID:109593982 atoB| acetyl-CoA acetyltransferase [Pseudomonas sp. P14]	0	FALSE	94.306	62	17	22	191	17	394	40.9	6.89	477.76	17	0	1.656	1.563	0.969	0.072228	0.948129	0.882953	13.82	14.97	17.85	137.6	79.9	82.6				3.49234e+07	2.02732e+07	2.09573e+07	High	High	High	1	Met-loss [N-Term]
FALSE	High	Master Protein	P14_v1_60055	ID:109590249 fbp| Fructose-1,6-bisphosphatase class 1 [Pseudomonas sp. P14]	0	FALSE	94.172	49	16	21	108	15	340	37.2	5.4	282.09	16	2	0.833	0.05	0.074	0.895081	1.38203e-16	2.38409e-08	33.19	93.12	80.78	4.9	5.9	289.2				1.70665e+06	2.04215e+06	1.0066e+08	High	High	High	1
FALSE	High	Master Protein	P14_v1_20226	ID:109589619 TldD protein [Pseudomonas sp. P14]	0	FALSE	94.099	69	23	23	103	23	480	52.1	5.8	244.17	23	0	0.948	0.822	0.965	0.986584	0.78921	0.941597	16.3	20.8	24.83	99.8	102.2	98.1				7.23843e+06	7.41184e+06	7.11721e+06	High	High	High	1
FALSE	High	Master Protein	P14_v1_170063	ID:109591304 argC| N-acetyl-gamma-glutamyl-phosphate reductase 1 [Pseudomonas sp. P14]	0	FALSE	94.078	81	19	20	145	19	344	36.3	6.8	440.7	19	0	0.891	1.687	1.799	0.984666	0.901804	0.936415	25.74	33.5	60.28	118.9	119.5	61.7				2.11986e+07	2.1303e+07	1.09954e+07	High	High	High	1
FALSE	High	Master Protein	P14_v1_90096	ID:109590665 methyl-accepting chemotaxis protein WspA [Pseudomonas sp. P14]	0	FALSE	93.997	52	20	23	74	20	540	58.6	5.03	234.59	20	0	1.379	1.053	0.804	0.376045	0.967567	0.863186	20.85	45.48	44.32	108.3	83.2	108.5				6.50839e+06	5.00193e+06	6.52073e+06	High	High	High	1
FALSE	High	Master Protein	P14_v1_170010	ID:109591251 pqqC| Pyrroloquinoline-quinone synthase [Pseudomonas sp. P14]	0	FALSE	93.838	80	15	17	138	15	251	29.1	6.76	446.33	15	0	4.069	0.249	0.059	2.40778e-11	0.00014909	1.39869e-09	29.43	19.09	41.41	60.6	11.2	228.2				1.31371e+07	2.43449e+06	4.94605e+07	High	High	High	1	Met-loss [N-Term]
FALSE	High	Master Protein	P14_v1_190012	ID:109591389 ctpA| Carboxy-terminal-processing protease [Pseudomonas sp. P14]	0	FALSE	93.824	56	21	24	84	21	438	46.3	5.87	240.14	21	0	1.017	0.855	0.826	0.973118	0.787916	0.854866	16.5	24.65	24.7	94.6	89.6	115.7				1.02402e+07	9.70112e+06	1.25273e+07	High	High	High	1
FALSE	High	Master Protein	P14_v1_830014	ID:109593856 fadH| 2,4-dienoyl-CoA reductase [Pseudomonas sp. P14]	0	FALSE	93.657	36	21	22	73	21	678	72.3	6.9	196.73	21	0	1.057	1.064	1.012	0.958614	0.989781	0.974667	11.31	30.85	31.01	119.8	84.1	96				4.30724e+06	3.02426e+06	3.45252e+06	High	High	High	1	Met-loss [N-Term]
FALSE	High	Master Protein	P14_v1_830001	ID:109593843 6-phosphogluconolactonase [Pseudomonas sp. P14]	0	FALSE	93.615	61	19	26	80	19	376	40.6	6.67	234.98	19	0	1.142	0.963	1.006	0.897272	0.941818	0.959397	21.54	19.05	36.95	104.4	99.3	96.3				5.86508e+06	5.57438e+06	5.40777e+06	High	High	High	1
FALSE	High	Master Protein	P14_v1_1130006	ID:109594427 RNase E specificity factor CsrD [Pseudomonas sp. P14]	0	FALSE	93.417	39	25	27	79	25	648	71.2	6.34	201.83	25	0	1.164	0.602	0.529	0.898103	0.436894	0.487956	17.27	29	34.93	88.6	68.1	143.3				2.32664e+06	1.78755e+06	3.76374e+06	High	High	High	1
FALSE	High	Master Protein	P14_v1_60034	ID:109590228 Non-ribosomal peptide synthetase [Pseudomonas sp. P14]	0	FALSE	93.287	16	26	28	47	26	2354	259.6	6.04	109.81	26	0	0.22	1.815	6.309	2.17645e-14	0.60625	0.00669041	57.91	47.88	78.66	76.6	180.1	43.3				1.8322e+06	4.30619e+06	1.0353e+06	High	High	High	1
FALSE	High	Master Protein	P14_v1_510027	ID:109592912 prfC| peptide chain release factor RF3 [Pseudomonas sp. P14]	0	FALSE	93.258	41	20	23	106	20	527	59.7	6.27	286.08	20	0	0.893	1.582	1.831	0.984666	0.919793	0.896324	18.83	16.41	34.35	107	123.9	69.1				1.09418e+07	1.26747e+07	7.0671e+06	High	High	High	1	Met-loss [N-Term]
FALSE	High	Master Protein	P14_v1_170002	ID:109591243 dmdC| 3-methylmercaptopropionyl-CoA dehydrogenase [Pseudomonas sp. P14]	0	FALSE	93.235	36	17	19	114	13	592	63.6	5.21	319.14	17	0	0.843	1.219	1.576	0.937737	0.999657	0.944122	29.77	38.62	30.01	97.8	121.8	80.4				8.16905e+06	1.01752e+07	6.71136e+06	High	High	High	1
FALSE	High	Master Protein	P14_v1_20207	ID:109589600 putative FAD-dependent oxidoreductase PA4991 [Pseudomonas sp. P14]	0	FALSE	92.975	70	18	23	93	18	391	42	7.21	306.29	18	0	0.99	0.839	0.755	0.984666	0.76513	0.757785	10.46	19.21	30.64	92.6	90.3	117				9.72787e+06	9.48612e+06	1.22863e+07	High	High	High	1
FALSE	High	Master Protein	P14_v1_90045	ID:109590614 lon| Lon protease 2 [Pseudomonas sp. P14]	0	FALSE	92.954	40	24	26	84	24	805	89.7	6.46	240.4	24	0	0.962	1.057	1.159	0.994001	0.96195	0.986222	25.85	35.2	48.76	101.1	105.8	93.1				8.54214e+06	8.94643e+06	7.86755e+06	High	High	High	1
FALSE	High	Master Protein	P14_v1_240035	ID:109591719 selA| selenocysteine synthase [Pseudomonas sp. P14]	0	FALSE	92.904	55	21	22	81	21	475	51.7	8.31	234.77	21	0	0.904	1.033	1.103	0.962705	0.973252	0.989817	9.78	19.39	16.96	105	99.2	95.8				4.86156e+06	4.5952e+06	4.43937e+06	High	High	High	1
FALSE	High	Master Protein	P14_v1_90080	ID:109590649 Succinyl-CoA--D-citramalate CoA-transferase [Pseudomonas sp. P14]	0	FALSE	92.814	56	20	21	100	20	399	43.3	5.62	278.97	20	0	1.105	1.361	1.207	0.924659	0.97667	0.999953	23.11	24.02	26.19	113.8	106.5	79.7				8.28038e+06	7.75442e+06	5.79908e+06	High	High	High	1
FALSE	High	Master Protein	P14_v1_1280010	ID:109594582 apeB| putative M18 family aminopeptidase 2 [Pseudomonas sp. P14]	0	FALSE	92.793	56	22	23	79	22	429	47	5.77	203.22	22	0	0.829	1.32	1.452	0.947614	0.990397	0.980798	13.02	21.98	22.81	100.7	124.5	74.9				1.17619e+07	1.45382e+07	8.7456e+06	High	High	High	1
FALSE	High	Master Protein	P14_v1_130018	ID:109590963 frmA| S-(hydroxymethyl)glutathione dehydrogenase [Pseudomonas sp. P14]	0	FALSE	92.679	59	16	21	167	15	370	39.2	6.35	422.63	16	0	0.917	0.263	0.282	0.993934	0.000289824	0.00853216	15.52	15.5	17.91	51.4	50.7	198				2.02329e+07	1.99679e+07	7.79915e+07	High	High	High	1
FALSE	High	Master Protein	P14_v1_540011	ID:109593006 dihydropyrimidine dehydrogenase (NAD+) subunit PreT [Pseudomonas sp. P14]	0	FALSE	92.557	61	21	21	58	21	455	48.8	5.71	178.85	21	0	0.878	34.788	32.464	0.951844	1.38203e-16	5.2441e-10	13.89	11.79	25.48	131	167.4	1.6				6.98561e+06	8.92956e+06	87352.1	High	High	High	1
FALSE	High	Master Protein	P14_v1_400019	ID:109592484 pheS| phenylalanine--tRNA ligase subunit alpha [Pseudomonas sp. P14]	0	FALSE	92.475	67	21	22	137	21	338	38.1	5.47	374.04	21	0	0.795	1.247	1.722	0.913273	0.993216	0.949046	12.55	38.91	51.64	99	126	75				2.21742e+07	2.82254e+07	1.68033e+07	High	High	High	1
FALSE	High	Master Protein	P14_v1_1820001	ID:109594786 frmB| S-formylglutathione hydrolase FrmB [Pseudomonas sp. P14]	0	FALSE	92.452	62	13	17	170	6	277	30.7	6.01	496.29	13	7	1.31	0.02	0.033	0.494365	1.38203e-16	2.78495e-13	22.79	86.74	84.17	5.6	4.1	290.2				3.12158e+06	2.27642e+06	1.60645e+08	High	High	High	1
FALSE	High	Master Protein	P14_v1_410010	ID:109592526 accD| Biotin-dependent 3-methylcrotonyl-coenzyme A carboxylase beta1 subunit [Pseudomonas sp. P14]	0	FALSE	92.444	61	24	25	65	24	535	57.4	6.89	191.38	24	0	1.081	0.636	0.587	0.939049	0.443567	0.554786	15.07	12.24	19.27	86.3	75	138.7				4.51754e+06	3.9243e+06	7.25546e+06	High	High	High	1	Met-loss [N-Term]
FALSE	High	Master Protein	P14_v1_490015	ID:109592828 argB| Acetylglutamate kinase [Pseudomonas sp. P14]	0	FALSE	92.421	59	12	19	148	12	301	31.9	5.87	476.21	12	0	0.787	1.405	2.058	0.902707	0.984595	0.879164	21.12	34.02	42.3	101.7	136.2	62.2				2.99919e+07	4.01593e+07	1.83372e+07	High	High	High	1	Met-loss [N-Term]
FALSE	High	Master Protein	P14_v1_270009	ID:109591876 two-component system, sensor histidine kinase [Pseudomonas sp. P14]	0	FALSE	92.36	45	22	24	42	22	632	70.7	6.7	125.19	22	0	0.028	0.084	22.937	1.64131e-16	2.67595e-10	3.12171e-08	0	33.29	0	15.4	11.3	273.3				438133	321811	7.766e+06	High	High	High	1
FALSE	High	Master Protein	P14_v1_100040	ID:109590714 hisA| 1-(5-phosphoribosyl)-5-[(5-phosphoribosylamino)methylideneamino] imidazole-4-carboxamide isomerase [Pseudomonas sp. P14]	0	FALSE	92.214	62	14	18	143	14	245	25.9	5.33	436.37	14	0	0.785	1.469	1.86	0.901241	0.972165	0.926846	9.61	13.8	23.55	97.5	125	77.4				1.78767e+07	2.2922e+07	1.4197e+07	High	High	High	1
FALSE	High	Master Protein	P14_v1_210050	ID:109591551 methyl-accepting chemotaxis protein [Pseudomonas sp. P14]	0	FALSE	91.816	47	14	21	60	13	492	52.1	5.57	224.2	14	0	1.068	29.835	26.009	0.950677	1.38203e-16	1.74592e-08	27.1	56.32	33.84	159.2	139.1	1.7				6.42608e+06	5.61141e+06	69091.5	High	High	Peak Found	1
FALSE	High	Master Protein	P14_v1_460014	ID:109592717 tldD| metalloprotease subunit TldD [Pseudomonas sp. P14]	0	FALSE	91.763	48	16	20	99	16	479	50.1	5.22	322.05	16	0	0.916	1.291	1.361	0.984666	0.990397	0.983942	10.5	27.5	22.06	99.5	115.4	85.1				8.36789e+06	9.7015e+06	7.15109e+06	High	High	High	1
FALSE	High	Master Protein	P14_v1_990003	ID:109594211 DUF3422 domain-containing protein [Pseudomonas sp. P14]	0	FALSE	91.613	52	17	20	87	17	445	49.3	5.54	240.74	17	0	1.37	0.194	0.133	0.344438	6.50621e-06	1.61303e-05	17.53	41.57	24.06	42.5	28.9	228.6				4.91351e+06	3.3398e+06	2.64174e+07	High	High	High	1
FALSE	High	Master Protein	P14_v1_760006	ID:109593648 purC| phosphoribosylaminoimidazole-succinocarboxamide synthase [Pseudomonas sp. P14]	0	FALSE	91.482	73	20	21	196	20	236	26.9	5.5	554.15	20	0	0.922	1.285	1.443	0.994001	0.999657	0.997122	21.04	46.78	43.34	106.3	113.2	80.5				6.19629e+07	6.59382e+07	4.69048e+07	High	High	High	1
FALSE	High	Master Protein	P14_v1_1040010	ID:109594302 Gluconate 2-dehydrogenase flavoprotein [Pseudomonas sp. P14]	0	FALSE	91.361	47	21	24	52	21	594	65.2	8.09	141.02	21	0	0.01		30.773	1.64131e-16		1.39869e-09	0		0	0.1	299.1	0.8				3290.59	1.72516e+07	47010	Peak Found	High	Peak Found	1
FALSE	High	Master Protein	P14_v1_460006	ID:109592709 mreB| dynamic cytoskeletal protein MreB [Pseudomonas sp. P14]	0	FALSE	91.305	59	20	22	198	20	345	36.9	5.39	587.65	20	0	0.897	1.303	1.467	0.984666	0.997292	0.994668	18.24	29.43	27.53	105.2	116.9	77.9				4.59008e+07	5.09858e+07	3.39613e+07	High	High	High	1
FALSE	High	Master Protein	P14_v1_620012	ID:109593257 sbp| sulfate/thiosulfate ABC transporter periplasmic binding protein Sbp [Pseudomonas sp. P14]	0	FALSE	91.234	59	17	20	132	17	332	36.6	6.83	412.07	17	0	0.791	1.472	1.811	0.90648	0.969306	0.933525	10.62	15.56	32.31	104.5	124	71.5				2.81406e+07	3.3416e+07	1.92604e+07	High	High	High	1
FALSE	High	Master Protein	P14_v1_550007	ID:109593029 sucB| dihydrolipoyltranssuccinylase [Pseudomonas sp. P14]	0	FALSE	91.082	32	12	17	307	12	407	42.4	5.44	965.77	12	0	1.007	2.225	2.104	0.962994	0.532696	0.857693	24.44	42.93	59.45	123.5	123.8	52.7				1.25478e+08	1.25819e+08	5.35645e+07	High	High	High	1
FALSE	High	Master Protein	P14_v1_240069	ID:109591753 rpsC| 30S ribosomal subunit protein S3 [Pseudomonas sp. P14]	0	FALSE	91.025	68	15	20	340	15	228	25.7	10.05	971.77	15	0	0.716	1.581	2.07	0.736517	0.941818	0.87387	17.57	21.38	48.43	101.9	130.4	67.7				1.37045e+08	1.75274e+08	9.10362e+07	High	High	High	1
FALSE	High	Master Protein	P14_v1_960005	ID:109594158 multidrug efflux pump [Pseudomonas sp. P14]	0	FALSE	90.782	26	23	24	76	23	1017	112.2	5.6	198.37	23	0	1.22	0.919	0.738	0.740086	0.908447	0.796482	22.71	26.55	37.27	103.5	83	113.5				5.60523e+06	4.49652e+06	6.14707e+06	High	High	High	1
FALSE	High	Master Protein	P14_v1_90065	ID:109590634 ffh| signal recognition particle protein component [Pseudomonas sp. P14]	0	FALSE	90.75	48	19	19	109	19	458	49.1	9.55	318.1	19	0	1.001	0.792	0.844	0.973118	0.619348	0.801783	8.86	29.76	32.19	92.8	93.1	114.1				1.15767e+07	1.16196e+07	1.42371e+07	High	High	High	1
FALSE	High	Master Protein	P14_v1_390029	ID:109592456 polar amino acid transport system substrate-binding protein [Pseudomonas sp. P14]	0	FALSE	90.625	61	15	26	170	15	266	29.8	8.13	640.14	15	0	1.092	0.5	0.465	0.905249	0.0831591	0.140209	13.28	17.4	28.41	72.9	72.9	154.2				1.75101e+07	1.75083e+07	3.7013e+07	High	High	High	1
FALSE	High	Master Protein	P14_v1_200052	ID:109591486 ycaC| putative hydrolase [Pseudomonas sp. P14]	0	FALSE	90.498	66	10	21	123	10	206	23	5.66	386.17	10	0	1.629	0.779	0.491	0.0866802	0.606643	0.177412	15.07	38.3	41.26	106.1	62.2	131.7				2.37317e+07	1.39278e+07	2.94704e+07	High	High	High	1
FALSE	High	Master Protein	P14_v1_110043	ID:109590810 AAA domain-containing protein [Pseudomonas sp. P14]	0	FALSE	90.438	51	20	21	97	20	498	55.7	5.49	250.8	20	0	0.905	0.914	0.921	0.984666	0.863723	0.896324	15.77	25.78	36.81	100.2	102.6	97.2				1.08806e+07	1.11442e+07	1.05607e+07	High	High	High	1
FALSE	High	Master Protein	P14_v1_460040	ID:109592743 hisD| Histidinol dehydrogenase [Pseudomonas sp. P14]	0	FALSE	90.253	57	19	21	147	19	441	47.5	5.52	369.96	19	0	0.719	1.945	2.941	0.745597	0.759333	0.500616	13.94	28.21	32.01	99.8	144.5	55.7				2.19107e+07	3.17085e+07	1.22282e+07	High	High	High	1
FALSE	High	Master Protein	P14_v1_240072	ID:109591756 rplB| 50S ribosomal subunit protein L2 [Pseudomonas sp. P14]	0	FALSE	90.207	65	19	22	315	19	274	29.7	11.14	852.1	19	0	0.737	1.224	1.65	0.807326	0.990397	0.966503	11.39	26.87	22	98.2	128.3	73.5				2.81997e+08	3.68287e+08	2.11155e+08	High	High	High	1
FALSE	High	Master Protein	P14_v1_470020	ID:109592764 exported protein of unknown function [Pseudomonas sp. P14]	0	FALSE	90.19	35	17	18	96	17	638	67.6	6.19	298.59	17	0	0.673	5.026	6.873	0.566785	0.00324147	0.00501273	9.12	24.63	23.03	115.7	167.8	16.4				1.17235e+07	1.69976e+07	1.66533e+06	High	High	High	1
FALSE	High	Master Protein	P14_v1_200063	ID:109591497 prs| ribose-phosphate diphosphokinase [Pseudomonas sp. P14]	0	FALSE	90.139	52	14	17	161	14	310	33.8	5.87	546.97	14	0	0.866	2.042	2.454	0.973118	0.675923	0.713338	22.58	34.7	33.6	110.5	132.7	56.8				2.96296e+07	3.55852e+07	1.52234e+07	High	High	High	1
FALSE	High	Master Protein	P14_v1_390007	ID:109592434 phaC| Poly(3-hydroxyalkanoate) polymerase 2 [Pseudomonas sp. P14]	0	FALSE	90.103	50	21	21	85	21	560	62.7	9.26	262	21	0	0.902	0.689	0.699	0.958614	0.538135	0.757785	17.49	22.15	30.92	85.1	93.4	121.4				5.20048e+06	5.70497e+06	7.4174e+06	High	High	High	1
FALSE	High	Master Protein	P14_v1_90006	ID:109590575 bglX| beta-D-glucoside glucohydrolase, periplasmic [Pseudomonas sp. P14]	0	FALSE	89.871	37	24	25	105	24	763	83.3	6.25	253.71	24	0	0.868	1.086	1.267	0.947614	0.976559	0.997122	22.47	26.99	29.79	102.3	103.4	94.3				7.6527e+06	7.73824e+06	7.06026e+06	High	High	High	1
FALSE	High	Master Protein	P14_v1_30158	ID:109589790 metQ| putative D-methionine-binding lipoprotein MetQ [Pseudomonas sp. P14]	0	FALSE	89.859	60	13	19	246	13	256	27.7	8.18	836.53	13	0	0.688	1.419	2.097	0.634343	0.980679	0.862968	22.01	27.71	20.66	94	138.4	67.6				3.4616e+07	5.09725e+07	2.48907e+07	High	High	High	1
FALSE	High	Master Protein	P14_v1_460038	ID:109592741 murA| UDP-N-acetylglucosamine 1-carboxyvinyltransferase [Pseudomonas sp. P14]	0	FALSE	89.7	56	19	21	156	19	421	44.9	5.53	445.13	19	0	0.908	1.232	1.376	0.986584	0.990692	0.997122	18.88	44.83	42.74	105.8	113.8	80.4				3.48484e+07	3.74959e+07	2.64707e+07	High	High	High	1
FALSE	High	Master Protein	P14_v1_490020	ID:109592833 dppA| putative di/tripeptide-binding protein 5 [Pseudomonas sp. P14]	0	FALSE	89.603	49	20	23	89	20	529	57.5	8.32	259.83	20	0	1.101	0.973	0.968	0.919958	0.916431	0.933525	25.43	29.99	26.99	104	91.3	104.7				9.60029e+06	8.42407e+06	9.65951e+06	High	High	High	1
FALSE	High	Master Protein	P14_v1_20211	ID:109589604 msbA| ATP-dependent lipid A-core flippase [Pseudomonas sp. P14]	0	FALSE	89.359	44	18	20	75	18	602	66.2	7.56	222.01	18	0	1.109	0.949	0.81	0.915667	0.916431	0.869756	7.17	36.17	31.65	103.4	90.6	106				6.44292e+06	5.64726e+06	6.60222e+06	High	High	High	1
FALSE	High	Master Protein	P14_v1_1410005	ID:109594671 aroH| Phospho-2-dehydro-3-deoxyheptonate aldolase [Pseudomonas sp. P14]	0	FALSE	89.265	52	21	23	83	21	448	49.7	6.44	241.95	21	0	1.02	1.271	1.308	0.980197	0.990692	0.986222	16.57	16.15	24.79	104.1	114.2	81.7				6.51329e+06	7.13923e+06	5.1097e+06	High	High	High	1
FALSE	High	Master Protein	P14_v1_190004	ID:109591381 glnG| DNA-binding transcriptional dual regulator NtrC [Pseudomonas sp. P14]	0	FALSE	89.193	53	21	21	68	21	478	53.1	6.07	189.61	21	0	1.024	1.236	1.166	0.984666	0.993216	0.996417	27.97	28.57	38.21	102.6	107.5	89.9				5.36911e+06	5.62736e+06	4.70168e+06	High	High	High	1
FALSE	High	Master Protein	P14_v1_10356	ID:109589372 conserved protein of unknown function [Pseudomonas sp. P14]	0	FALSE	89.187	26	22	22	39	22	1101	125.4	6.38	115.17	22	0	1.659	0.317	0.191	0.160347	0.00751379	0.00351024	27.62	15.89	47.35	64.6	28.3	207.1				1.31759e+06	576089	4.22362e+06	High	High	High	1
FALSE	High	Master Protein	P14_v1_20016	ID:109589409 stcD| putative N-methylproline demethylase [Pseudomonas sp. P14]	0	FALSE	89.035	38	21	22	61	21	678	75.2	6.54	148.58	21	0	1.034	0.696	0.654	0.984666	0.759824	0.738515	30.49	38.92	24.33	92	85.8	122.2				2.04557e+06	1.90676e+06	2.71652e+06	High	High	High	1
FALSE	High	Master Protein	P14_v1_1110001	ID:109594392 propionyl-CoA synthetase [Pseudomonas sp. P14]	0	FALSE	88.839	40	19	20	100	19	629	68.8	6.25	285.06	19	0	1.791	1.871	1.048	0.028711	0.785167	0.959397	12.15	40.73	37.63	141.8	79.9	78.3				1.70642e+07	9.60903e+06	9.41717e+06	High	High	High	1
FALSE	High	Master Protein	P14_v1_20053	ID:109589446 hemL| glutamate-1-semialdehyde 2,1-aminomutase [Pseudomonas sp. P14]	0	FALSE	88.647	48	15	17	143	15	427	45.2	5.87	448.59	15	0	0.824	1.475	1.642	0.94434	0.969306	0.969681	11.5	53.32	35.2	103.1	128	68.8				2.47049e+07	3.06683e+07	1.64858e+07	High	High	High	1
FALSE	High	Master Protein	P14_v1_450005	ID:109592671 spuC| Putrescine--pyruvate aminotransferase [Pseudomonas sp. P14]	0	FALSE	88.598	51	16	21	123	12	453	49.8	6.28	344.49	16	5	1.161	1.015	0.859	0.826841	0.919793	0.775827	7.92	24.94	19.8	104.5	94.8	100.7				1.65232e+07	1.49947e+07	1.59356e+07	High	High	High	1	Met-loss [N-Term]
FALSE	High	Master Protein	P14_v1_110052	ID:109590819 mdh| Malate dehydrogenase [Pseudomonas sp. P14]	0	FALSE	88.58	73	14	17	57	14	309	32.6	5.39	199.69	14	0	0.753	2.346	3.259	0.705144	0.383852	0.270714	20.29	35.39	32.47	114.6	142.7	42.7				6.94793e+06	8.65301e+06	2.59075e+06	High	High	High	1
FALSE	High	Master Protein	P14_v1_460011	ID:109592714 rng| RNase G [Pseudomonas sp. P14]	0	FALSE	88.502	47	21	22	99	21	485	54.8	5.49	242.93	21	0	1.049	1.259	1.083	0.951676	0.999657	0.9714	18.33	26.51	30.92	111.1	98.7	90.3				1.04194e+07	9.25553e+06	8.47156e+06	High	High	High	1
FALSE	High	Master Protein	P14_v1_750002	ID:109593615 ycaO| Ribosomal protein S12 methylthiotransferase accessory factor YcaO [Pseudomonas sp. P14]	0	FALSE	87.968	36	20	22	73	20	728	81.5	4.7	194.38	20	0	0.977	0.744	0.912	0.994001	0.728432	0.93347	23.84	49.47	50.19	88.5	98.6	112.8				4.2881e+06	4.77773e+06	5.46655e+06	High	High	High	1
FALSE	High	Master Protein	P14_v1_30116	ID:109589748 qorA| putative quinone oxidoreductase 1 [Pseudomonas sp. P14]	0	FALSE	87.942	77	19	20	105	19	325	34.3	7.88	331.85	19	0	0.88	0.945	0.961	0.983625	0.875309	0.874882	11.41	24.95	40.12	99.4	99	101.6				2.20212e+07	2.19118e+07	2.2498e+07	High	High	High	1
FALSE	High	Master Protein	P14_v1_110031	ID:109590798 ndh| NADH:quinone oxidoreductase II [Pseudomonas sp. P14]	0	FALSE	87.893	53	20	22	132	20	431	47.1	8.68	292.34	20	0	3.15	8.343	2.836	5.01484e-07	8.55323e-06	0.415681	13.75	50.29	50.71	208.2	67.1	24.8				3.22728e+07	1.0397e+07	3.84023e+06	High	High	High	1
FALSE	High	Master Protein	P14_v1_80101	ID:109590564 astB| N-succinylarginine dihydrolase [Pseudomonas sp. P14]	0	FALSE	87.812	55	19	20	84	19	449	48.8	6.47	234.06	19	0	1.022	1.629	1.689	0.95737	0.907703	0.931428	18.24	18.85	26.33	118.2	119.5	62.3				1.22608e+07	1.2387e+07	6.46059e+06	High	High	High	1
FALSE	High	Master Protein	P14_v1_1050012	ID:109594319 rplA| 50S ribosomal subunit protein L1 [Pseudomonas sp. P14]	0	FALSE	87.62	79	15	21	329	15	231	24.2	9.5	1029.33	15	0	0.888	1.525	1.559	0.984666	0.956024	0.97678	21.93	21.79	23.47	112	116.9	71.1				2.87295e+08	2.99841e+08	1.82352e+08	High	High	High	1
FALSE	High	Master Protein	P14_v1_40029	ID:109589871 nspC| Carboxynorspermidine/carboxyspermidine decarboxylase [Pseudomonas sp. P14]	0	FALSE	87.456	52	14	21	123	14	365	41	5.24	313.39	14	0	0.821	1.685	1.943	0.939049	0.890393	0.899935	11.3	25.74	27.46	103	135	62.1				1.66853e+07	2.18737e+07	1.00553e+07	High	High	High	1
FALSE	High	Master Protein	P14_v1_80083	ID:109590546 ydiJ| putative FAD-linked oxidoreductase [Pseudomonas sp. P14]	0	FALSE	87.44	30	25	28	82	25	1006	110.8	7.12	214.45	25	0	0.621	1.236	2.034	0.130708	0.980679	0.736182	25.74	21.48	23.85	80.1	151.3	68.6				2.76463e+06	5.22172e+06	2.36813e+06	High	High	High	1
FALSE	High	Master Protein	P14_v1_40129	ID:109589971 acsA| Acetoacetyl-coenzyme A synthetase [Pseudomonas sp. P14]	0	FALSE	86.954	42	18	22	91	18	650	72.2	6.33	221.82	18	0	1.079	1.233	1.217	0.947614	0.989781	0.994668	22.43	28.82	25.58	107.7	103.7	88.5				3.8097e+06	3.66802e+06	3.13031e+06	High	High	High	1	Met-loss [N-Term]
FALSE	High	Master Protein	P14_v1_590025	ID:109593174 DegT/DnrJ/EryC1/StrS family aminotransferase [Pseudomonas sp. P14]	0	FALSE	86.929	51	16	19	180	16	391	43	6.52	496.32	16	0	0.862	0.751	0.792	0.969636	0.552728	0.693032	15.05	32.99	30.54	84.6	99.6	115.8				2.32465e+07	2.73505e+07	3.17888e+07	High	High	High	1
FALSE	High	Master Protein	P14_v1_130027	ID:109590972 mutS| DNA mismatch repair protein MutS [Pseudomonas sp. P14]	0	FALSE	86.894	36	25	26	63	25	857	95.1	6.32	165.4	25	0	0.856	1.862	2.379	0.923132	0.674382	0.570054	23.02	42.04	28.57	105.1	130.8	64.2				3.98317e+06	4.95727e+06	2.43369e+06	High	High	High	1	Met-loss [N-Term]
FALSE	High	Master Protein	P14_v1_130008	ID:109590953 dnaE| DNA polymerase III subunit alpha [Pseudomonas sp. P14]	0	FALSE	86.878	19	23	24	56	23	1174	130.9	5.63	129.74	23	0	0.884	1.225	1.508	0.939049	0.977723	0.93347	13.4	28.47	29.09	94.2	127.9	77.9				2.67202e+06	3.62781e+06	2.20841e+06	High	High	High	1
FALSE	High	Master Protein	P14_v1_540010	ID:109593005 dht| D-hydantoinase/dihydropyrimidinase [Pseudomonas sp. P14]	0	FALSE	86.603	50	15	19	70	15	479	52.4	6.13	218.01	15	0	0.855	5.907	7.287	0.92833	0.000380676	0.00282191	21.12	42.53	33.76	131.8	149.5	18.7				7.01289e+06	7.95135e+06	995447	High	High	High	1
FALSE	High	Master Protein	P14_v1_80004	ID:109590467 cysK| cysteine synthase A [Pseudomonas sp. P14]	0	FALSE	86.564	75	14	18	160	14	324	34.3	5.97	553.06	14	0	0.923	1.637	1.786	0.994001	0.916431	0.938608	9.31	14.17	26.49	111.1	111.6	77.3				3.49052e+07	3.5076e+07	2.42838e+07	High	High	High	1
FALSE	High	Master Protein	P14_v1_240051	ID:109591735 rpsD| 30S ribosomal subunit protein S4 [Pseudomonas sp. P14]	0	FALSE	86.539	67	18	21	364	18	206	23	9.96	785.53	18	0	0.765	1.329	1.772	0.880241	0.992686	0.941597	16.39	21.18	20.07	101.3	127.9	70.8				3.19126e+08	4.02675e+08	2.23073e+08	High	High	High	1
FALSE	High	Master Protein	P14_v1_90074	ID:109590643 hom| Homoserine dehydrogenase [Pseudomonas sp. P14]	0	FALSE	86.486	50	15	18	95	15	434	46.1	5.4	315.02	15	0	0.791	1.652	2.362	0.90648	0.902369	0.749147	22.67	39.85	31.82	96.2	147.8	55.9				1.66504e+07	2.55783e+07	9.67941e+06	High	High	High	1
FALSE	High	Master Protein	P14_v1_1550002	ID:109594738 yqeF| putative acyltransferase [Pseudomonas sp. P14]	0	FALSE	86.422	47	13	17	52	13	392	40.3	6.43	166.18	13	0	15.674	9.759	0.62	1.64131e-16	3.26365e-07	0.768162	72.4	50.99	32.61	281.2	5.7	13.1				2.70298e+07	545496	1.26138e+06	High	High	High	1	Met-loss [N-Term]
FALSE	High	Master Protein	P14_v1_390031	ID:109592458 opgG| osmoregulated periplasmic glucans (OPGs) biosynthesis protein G [Pseudomonas sp. P14]	0	FALSE	86.387	44	19	21	152	19	579	64.4	7.39	388.8	19	0	1.021	1.237	1.229	0.95737	0.990692	0.972265	7.6	28.42	26.32	109.7	110	80.3				1.66817e+07	1.67232e+07	1.22043e+07	High	High	High	1
FALSE	High	Master Protein	P14_v1_90035	ID:109590604 putative periplasmic serine endoprotease DegP-like [Pseudomonas sp. P14]	0	FALSE	86.2	54	16	25	100	16	477	50.9	6.34	306.94	16	0	0.911	1.107	1.023	0.989511	0.964781	0.900509	14.15	44.57	36.29	96.1	105.4	98.5				1.72826e+07	1.8962e+07	1.77286e+07	High	High	High	1
FALSE	High	Master Protein	P14_v1_230023	ID:109591652 hemoglobin/transferrin/lactoferrin receptor protein [Pseudomonas sp. P14]	0	FALSE	86.176	30	21	22	39	21	862	95.1	6.1	86.73	21	0	2.216	0.38	0.197	0.0151721	0.080885	0.00159206	23.58	22.41	48.47	60.7	7.4	231.9				587168	71407.6	2.24137e+06	High	High	High	1
FALSE	High	Master Protein	P14_v1_1110012	ID:109594403 prpD| 2-methylcitrate dehydratase [Pseudomonas sp. P14]	0	FALSE	86.082	51	24	24	97	24	494	54.9	6.77	251.62	24	0	1.136	0.759	0.651	0.894017	0.555191	0.545002	9.94	24.06	23.32	93.5	80.2	126.3				1.07581e+07	9.22513e+06	1.45305e+07	High	High	High	1	Met-loss [N-Term]
FALSE	High	Master Protein	P14_v1_120062	ID:109590924 hpd| 4-hydroxyphenylpyruvate dioxygenase [Pseudomonas sp. P14]	0	FALSE	85.848	58	20	20	95	20	358	40.1	5.11	255.86	20	0	0.868	2.84	3.004	0.975423	0.171706	0.403838	13.71	36.69	54.69	118.6	133.9	47.5				1.49314e+07	1.6862e+07	5.97393e+06	High	High	High	1
FALSE	High	Master Protein	P14_v1_130030	ID:109590975 recA| DNA recombination/repair protein RecA [Pseudomonas sp. P14]	0	FALSE	85.833	48	13	18	132	13	355	37.5	5.67	469.68	13	0	1.103	0.655	0.614	0.919958	0.347126	0.534364	24.89	31.09	33.29	88.6	72.5	138.9				9.25685e+06	7.56984e+06	1.45046e+07	High	High	High	1
FALSE	High	Master Protein	P14_v1_90060	ID:109590629 purT| phosphoribosylglycinamide formyltransferase 2 [Pseudomonas sp. P14]	0	FALSE	85.808	50	18	20	128	17	393	42.5	5.73	362.81	18	1	0.88	1.419	1.603	0.983803	0.980679	0.974667	13.68	22.45	43.05	103.7	121.8	74.5				5.01759e+07	5.89233e+07	3.60645e+07	High	High	High	1
FALSE	High	Master Protein	P14_v1_1160007	ID:109594465 8-oxo-dGTP diphosphatase [Pseudomonas sp. P14]	0	FALSE	85.794	56	14	16	86	14	314	34.3	6.06	306.33	14	0	0.971	1.761	1.661	0.999405	0.775001	0.896324	12.33	21.95	15.37	114.6	119.5	65.9				4.55327e+06	4.74803e+06	2.61786e+06	High	High	High	1
FALSE	High	Master Protein	P14_v1_120076	ID:109590938 bacteriophage N4 adsorption protein A [Pseudomonas sp. P14]	0	FALSE	85.755	31	26	26	61	26	1001	112	6.57	147.18	26	0	1.685	0.832	0.454	0.0592299	0.875309	0.346135	31.96	27.04	33.33	104.8	60.9	134.3				2.76124e+06	1.60381e+06	3.5398e+06	High	High	High	1
FALSE	High	Master Protein	P14_v1_530019	ID:109592978 c-di-GMP phosphodiesterase [Pseudomonas sp. P14]	0	FALSE	85.718	38	21	21	62	21	683	77.3	5.88	163.61	21	0	1.121	0.836	0.771	0.898103	0.860188	0.866501	6.14	21.54	19.36	100.9	99.7	99.3				4.31948e+06	4.26746e+06	4.25063e+06	High	High	High	1
FALSE	High	Master Protein	P14_v1_480012	ID:109592793 dnaJ| chaperone protein DnaJ [Pseudomonas sp. P14]	0	FALSE	85.688	60	21	21	101	21	375	40.2	6.73	285.74	21	0	0.799	1.391	1.588	0.919958	0.988373	0.976549	21.99	34.05	32.7	98.9	122.6	78.6				1.81219e+07	2.24656e+07	1.4405e+07	High	High	High	1
FALSE	High	Master Protein	P14_v1_30080	ID:109589712 parB| putative chromosome-partitioning protein ParB [Pseudomonas sp. P14]	0	FALSE	85.67	74	17	20	95	17	290	32.4	6.55	278.51	17	0	0.84	1.193	1.468	0.92833	0.990692	0.971401	21.74	28.98	33.33	96.5	113	90.5				8.53715e+06	9.99509e+06	8.00673e+06	High	High	High	1
FALSE	High	Master Protein	P14_v1_100042	ID:109590716 proV| glycine betaine ABC transporter ATP binding subunit ProV [Pseudomonas sp. P14]	0	FALSE	85.603	58	18	18	60	18	392	43.7	7.74	184.94	18	0	1.182	0.61	0.483	0.887917	0.472384	0.39819	13.4	23.66	34.94	86.2	59.7	154.1				2.42068e+06	1.67553e+06	4.32373e+06	High	High	High	1
FALSE	High	Master Protein	P14_v1_30089	ID:109589721 dnaN| beta sliding clamp [Pseudomonas sp. P14]	0	FALSE	85.392	62	21	21	113	21	367	40.7	5.25	341.87	21	0	0.949	0.996	1.096	0.988033	0.907703	0.933525	18.81	31.59	33.79	98	104.8	97.1				3.0167e+07	3.2255e+07	2.98823e+07	High	High	High	1
FALSE	High	Master Protein	P14_v1_110093	ID:109590860 obgE| GTPase ObgE [Pseudomonas sp. P14]	0	FALSE	85.369	51	16	21	71	16	408	44.8	4.94	207.99	16	0	0.855	0.681	0.851	0.92833	0.47099	0.879164	23.28	23.76	42.14	84.8	96.9	118.3				6.78886e+06	7.75688e+06	9.47273e+06	High	High	High	1
FALSE	High	Master Protein	P14_v1_710016	ID:109593527 dapD| 2,3,4,5-tetrahydropyridine-2,6-dicarboxylate N-succinyltransferase [Pseudomonas sp. P14]	0	FALSE	85.281	49	15	19	199	15	344	35.8	5.8	534.25	15	0	0.851	1.578	2.021	0.958614	0.945814	0.892111	18.86	21.96	30.55	103.2	127.5	69.3				3.16889e+07	3.91763e+07	2.1282e+07	High	High	High	1	Met-loss [N-Term]
FALSE	High	Master Protein	P14_v1_1000007	ID:109594232 cysB| DNA-binding transcriptional dual regulator CysB [Pseudomonas sp. P14]	0	FALSE	85.248	62	17	19	97	17	324	35.9	6.74	287.43	17	0	0.94	1.275	1.337	0.994001	0.999657	0.988721	10.85	22.43	28.54	105.2	111.2	83.7				1.72203e+07	1.82018e+07	1.37033e+07	High	High	High	1
FALSE	High	Master Protein	P14_v1_1150001	ID:109594450 rdgC| Recombination-associated protein RdgC [Pseudomonas sp. P14]	0	FALSE	85.071	49	19	22	97	19	306	34.3	4.93	269.09	19	0	0.828	2.244	2.528	0.947614	0.47099	0.637926	24.63	60.64	67.37	109.9	138.4	51.7				1.4134e+07	1.77891e+07	6.64953e+06	High	High	High	1
FALSE	High	Master Protein	P14_v1_260053	ID:109591867 sodium-type flagellar protein MotY [Pseudomonas sp. P14]	0	FALSE	84.974	67	18	21	57	18	313	33.8	9.7	155.65	18	0	0.981	0.502	0.505	0.995638	0.189705	0.386809	17.2	32.59	13.97	70.8	68.1	161.1				3.47339e+06	3.34167e+06	7.90476e+06	High	High	High	1
FALSE	High	Master Protein	P14_v1_390013	ID:109592440 ubiE| bifunctional 2-octaprenyl-6-methoxy-1,4-benzoquinol methylase and demethylmenaquinone methyltransferase [Pseudomonas sp. P14]	0	FALSE	84.95	68	15	18	81	15	256	28.4	9.03	225.38	15	0	0.869	2.128	2.52	0.954962	0.606643	0.546241	16.13	29.39	19.95	111.1	133.7	55.2				8.01171e+06	9.64381e+06	3.98181e+06	High	High	High	1
FALSE	High	Master Protein	P14_v1_1860001	ID:109594790 transketolase [Pseudomonas sp. P14]	0	FALSE	84.729	45	12	21	226	12	319	34.4	5.12	659.92	12	0	0.844	1.952	2.372	0.95737	0.752893	0.747734	12.85	33.42	50.34	103.7	131.2	65.1				4.60591e+07	5.82966e+07	2.89439e+07	High	High	High	1
FALSE	High	Master Protein	P14_v1_270027	ID:109591894 universal stress protein E [Pseudomonas sp. P14]	0	FALSE	84.71	61	15	16	173	15	291	31.6	6.54	596.11	15	0	0.685	68.267	100	0.621402	1.38203e-16	1.15948e-16	12.61	29.68	33.45	121.1	177.5	1.4				9.4628e+07	1.38656e+08	1.1105e+06	High	High	High	1
FALSE	High	Master Protein	P14_v1_550005	ID:109593027 sdhB| succinate:quinone oxidoreductase, iron-sulfur cluster binding protein [Pseudomonas sp. P14]	0	FALSE	84.568	60	13	19	156	13	234	26	7.43	480.77	13	0	1.283	2.617	2.04	0.567432	0.289719	0.885242	5.8	33.87	29.17	137.7	112.3	50				8.32635e+07	6.79148e+07	3.02429e+07	High	High	High	1
FALSE	High	Master Protein	P14_v1_100026	ID:109590700 artJ| L-arginine ABC transporter periplasmic binding protein [Pseudomonas sp. P14]	0	FALSE	84.539	55	15	19	199	15	250	27.8	5.88	563.45	15	0	1.101	0.91	0.913	0.898103	0.835622	0.83558	23.1	15.67	29.15	101.9	96.1	102				6.14232e+07	5.79252e+07	6.15195e+07	High	High	High	1
FALSE	High	Master Protein	P14_v1_450011	ID:109592677 triphosphatase [Pseudomonas sp. P14]	0	FALSE	84.15	54	19	20	109	19	455	52.1	5.83	271.07	19	0	0.918	1.029	1.156	0.984463	0.959008	0.986222	16.64	17.95	28.18	99.4	108.2	92.4				7.56514e+06	8.22983e+06	7.03104e+06	High	High	High	1
FALSE	High	Master Protein	P14_v1_1000014	ID:109594239 prpB| 2-methylisocitrate lyase [Pseudomonas sp. P14]	0	FALSE	84.06	42	11	14	107	11	296	31.8	5.55	335.31	11	0	0.957	1.211	1.148	0.985193	0.989781	0.94892	22.43	34.04	24.08	105.1	104.7	90.1				1.53087e+07	1.52513e+07	1.31276e+07	High	High	High	1
FALSE	High	Master Protein	P14_v1_20167	ID:109589560 mutL| DNA mismatch repair protein MutL [Pseudomonas sp. P14]	0	FALSE	84.045	36	19	19	62	19	633	69.8	6.67	185.34	19	0	0.845	0.884	1.13	0.898103	0.948129	0.997122	26.27	24.25	51.39	94.7	111.5	93.8				1.97659e+06	2.32593e+06	1.95761e+06	High	High	High	1
FALSE	High	Master Protein	P14_v1_30070	ID:109589702 glmU| fused N-acetylglucosamine-1-phosphate uridyltransferase and glucosamine-1-phosphate acetyltransferase [Pseudomonas sp. P14]	0	FALSE	83.977	50	15	22	158	15	455	48.4	6.73	444.23	15	0	0.858	0.844	1.05	0.962994	0.749871	0.920827	25.06	29.48	19.45	90.7	94.9	114.4				1.7738e+07	1.85534e+07	2.23574e+07	High	High	High	1
FALSE	High	Master Protein	P14_v1_710012	ID:109593523 N-succinyldiaminopimelate aminotransferase [Pseudomonas sp. P14]	0	FALSE	83.887	58	20	22	82	20	398	43.7	5.69	249.84	20	0	0.925	0.948	1.022	0.984463	0.919793	0.971158	25.79	31.16	45.7	94.1	105.3	100.5				6.03273e+06	6.74796e+06	6.4422e+06	High	High	High	1
FALSE	High	Master Protein	P14_v1_20210	ID:109589603 hldE| fused heptose 7-phosphate kinase/heptose 1-phosphate adenyltransferase [Pseudomonas sp. P14]	0	FALSE	83.855	52	19	21	65	19	473	49.9	6	192.63	19	0	0.918	0.972	1.075	0.980197	0.934318	0.976549	11.96	38.05	33.65	102.6	108.8	88.7				6.93299e+06	7.35336e+06	5.99338e+06	High	High	High	1
FALSE	High	Master Protein	P14_v1_80031	ID:109590494 Beta-ketodecanoyl-[acyl-carrier-protein] synthase [Pseudomonas sp. P14]	0	FALSE	83.725	46	15	19	103	15	373	40.3	5.58	321.78	15	0	0.899	0.958	1.04	0.984666	0.880539	0.912663	8.53	52.66	25.48	97.4	112	90.6				1.51208e+07	1.73748e+07	1.40561e+07	High	High	High	1
FALSE	High	Master Protein	P14_v1_320035	ID:109592171 hscA| iron-sulfur cluster biosynthesis chaperone HscA [Pseudomonas sp. P14]	0	FALSE	83.641	42	21	22	82	21	620	65.8	5.03	218.45	21	0	0.897	0.975	1.078	0.961812	0.935862	0.975856	8.31	26.34	11.73	96.7	104.5	98.8				6.84327e+06	7.39343e+06	6.99416e+06	High	High	High	1	Met-loss [N-Term]
FALSE	High	Master Protein	P14_v1_220024	ID:109591588 fabG| 3-oxoacyl-[acyl-carrier-protein] reductase FabG [Pseudomonas sp. P14]	0	FALSE	83.401	54	12	22	179	12	246	25.5	6.2	521.98	12	0	1.024	1.205	1.137	0.955132	0.989781	0.944122	13.39	41.61	52.77	105.7	105.3	89				9.95586e+07	9.91978e+07	8.38833e+07	High	High	High	1
FALSE	High	Master Protein	P14_v1_80025	ID:109590488 fadD| long-chain-fatty-acid--CoA ligase [Pseudomonas sp. P14]	0	FALSE	83.389	35	18	19	92	18	565	61.8	7.62	272.22	18	0	1.035	0.949	0.972	0.961475	0.901804	0.93347	21.8	34.42	36.78	104.2	94.8	101				9.02669e+06	8.21123e+06	8.74318e+06	High	High	High	1
FALSE	High	Master Protein	P14_v1_1270002	ID:109594566 diguanylate cyclase [Pseudomonas sp. P14]	0	FALSE	83.386	28	20	21	78	20	818	91.3	5.81	208.5	20	0	1.409	1.069	0.734	0.288481	0.989781	0.843306	23.28	19.33	38.89	113.9	83	103.1				3.32838e+06	2.42381e+06	3.01232e+06	High	High	High	1
FALSE	High	Master Protein	P14_v1_780009	ID:109593720 putative carboxypeptidase [Pseudomonas sp. P14]	0	FALSE	83.261	57	14	16	105	14	382	42.4	5.52	340.69	14	0	1.106	0.868	0.777	0.898103	0.786211	0.67057	9.32	9.69	19.74	100.1	92.2	107.6				2.17595e+07	2.00335e+07	2.33877e+07	High	High	High	1
FALSE	High	Master Protein	P14_v1_320024	ID:109592160 secD| Sec translocon accessory complex subunit SecD [Pseudomonas sp. P14]	0	FALSE	83.033	32	20	21	96	20	620	66.9	9.07	250.33	20	0	1.071	1.413	1.401	0.92833	0.976459	0.97678	33.05	19.27	37.07	117.1	110.4	72.5				1.20911e+07	1.13971e+07	7.48042e+06	High	High	High	1
FALSE	High	Master Protein	P14_v1_180037	ID:109591345 talB| transaldolase B [Pseudomonas sp. P14]	0	FALSE	83.021	66	15	17	139	15	308	33.7	5.25	428.02	15	0	0.987	1.801	1.829	0.980197	0.84512	0.93347	16.23	25.81	14.23	119.8	116.4	63.8				2.86213e+07	2.78055e+07	1.52446e+07	High	High	High	1
FALSE	High	Master Protein	P14_v1_270011	ID:109591878 Porin domain-containing protein [Pseudomonas sp. P14]	0	FALSE	82.918	42	14	18	79	14	395	42.8	4.72	235.46	14	0	100	24.961	0.043	1.64131e-16	5.9969e-14	1.59281e-06	0	21.03	0	290.9	0.1	9				3.89611e+07	12805.9	1.20632e+06	High	Peak Found	High	1
FALSE	High	Master Protein	P14_v1_370016	ID:109592371 tas| putative NADP(H)-dependent aldo-keto reductase Tas [Pseudomonas sp. P14]	0	FALSE	82.772	55	16	21	97	16	346	38.7	6.76	295.26	16	0	0.932	0.805	0.899	0.985193	0.730557	0.904311	18.78	27.51	28.78	91.8	94.3	113.9				8.23182e+06	8.45448e+06	1.02084e+07	High	High	High	1
FALSE	High	Master Protein	P14_v1_850019	ID:109593902 galU| UTP--glucose-1-phosphate uridylyltransferase [Pseudomonas sp. P14]	0	FALSE	82.74	63	13	19	150	13	279	30.9	5.45	413.12	13	0	1.083	1.507	1.352	0.919958	0.956391	0.999424	11.41	80	92.99	122.8	115.1	62.1				1.88204e+07	1.76366e+07	9.51666e+06	High	High	High	1
FALSE	High	Master Protein	P14_v1_580008	ID:109593129 etfA| Electron transfer flavoprotein subunit alpha [Pseudomonas sp. P14]	0	FALSE	82.727	59	11	21	513	11	309	31.2	5.21	1581.5	11	0	0.704	2.39	3.144	0.688641	0.422036	0.420109	26.13	31.2	51.25	105.4	149.2	45.4				9.59018e+07	1.35773e+08	4.13336e+07	High	High	High	1
FALSE	High	Master Protein	P14_v1_290001	ID:109591974 outer-membrane receptor for ferric coprogen and ferric-rhodotorulic acid [Pseudomonas sp. P14]	0	FALSE	82.677	35	20	22	69	20	738	82.2	5.48	170.87	20	0	1.939	0.757	0.384	0.0138401	0.767964	0.182225	23.78	24.78	25.63	109.9	47.2	142.9				2.83004e+06	1.216e+06	3.67834e+06	High	High	High	1
FALSE	High	Master Protein	P14_v1_540024	ID:109593019 Malto-oligosyltrehalose trehalohydrolase [Pseudomonas sp. P14]	0	FALSE	82.493	41	17	18	51	17	580	64.7	5.96	166.3	17	0	1.167	0.688	0.614	0.868379	0.667913	0.661931	14.91	45.16	40.59	95.5	73.9	130.6				2.88705e+06	2.23649e+06	3.94998e+06	High	High	High	1
FALSE	High	Master Protein	P14_v1_30209	ID:109589841 glutaryl-CoA dehydrogenase [Pseudomonas sp. P14]	0	FALSE	82.354	53	14	19	79	14	393	43.2	6.27	256.23	14	0	1.094	0.704	0.651	0.92833	0.51681	0.636523	19.03	18.23	38.25	96.8	87.1	116.2				7.37944e+06	6.64152e+06	8.86097e+06	High	High	High	1
FALSE	High	Master Protein	P14_v1_220059	ID:109591623 DUF815 domain-containing protein [Pseudomonas sp. P14]	0	FALSE	82.334	54	17	21	98	17	295	33.6	6.3	246.5	17	0	1.173	1.439	1.02	0.805592	0.975244	0.93347	25.38	34.28	31.48	115.5	96.1	88.4				1.50273e+07	1.25021e+07	1.15014e+07	High	High	High	1
FALSE	High	Master Protein	P14_v1_1050010	ID:109594317 rplJ| 50S ribosomal subunit protein L10 [Pseudomonas sp. P14]	0	FALSE	82.109	69	11	20	390	11	166	17.6	9.44	1343.72	11	0	0.83	1.544	1.755	0.947614	0.949634	0.944122	20.28	24.8	31.12	98.8	129	72.2				1.53524e+08	2.00382e+08	1.12237e+08	High	High	High	1
FALSE	High	Master Protein	P14_v1_490016	ID:109592829 algC| Phosphomannomutase/phosphoglucomutase [Pseudomonas sp. P14]	0	FALSE	81.972	42	16	21	79	16	466	50.6	5.39	209.67	16	0	1.456	0.983	0.691	0.239672	0.955163	0.777992	28.35	25.29	37.18	110.9	81.8	107.2				4.50237e+06	3.32257e+06	4.35367e+06	High	High	High	1	Met-loss [N-Term]
FALSE	High	Master Protein	P14_v1_400034	ID:109592499 rbsB| D-ribose/D-allose-binding protein [Pseudomonas sp. P14]	0	FALSE	81.924	68	17	18	116	17	319	33.7	6.16	345.27	17	0	1.294	0.949	0.819	0.539918	0.875309	0.726955	14.83	19.97	36.23	109.1	89.9	100.9				1.74849e+07	1.44115e+07	1.61745e+07	High	High	High	1
FALSE	High	Master Protein	P14_v1_50029	ID:109590056 N-methylhydantoinase A [Pseudomonas sp. P14]	0	FALSE	81.876	42	20	20	56	20	693	74.7	5.35	173.13	20	0	0.765	1.356	1.933	0.686041	0.956391	0.781832	22.57	43.1	49.35	93.5	138.4	68.1				3.17307e+06	4.69927e+06	2.31211e+06	High	High	High	1
FALSE	High	Master Protein	P14_v1_60074	ID:109590268 nucleoid-associated protein [Pseudomonas sp. P14]	0	FALSE	81.865	59	19	21	72	19	386	42.9	5.64	204.97	19	0	0.906	0.957	1.203	0.984666	0.907703	0.989417	12.94	23.86	28.63	90.4	121.1	88.5				8.76819e+06	1.17452e+07	8.58473e+06	High	High	High	1
FALSE	High	Master Protein	P14_v1_260045	ID:109591859 argF| Ornithine carbamoyltransferase [Pseudomonas sp. P14]	0	FALSE	81.764	60	15	19	80	15	306	34.4	5.88	236.62	15	0	0.79	1.237	1.524	0.868379	0.996599	0.94892	29.1	24.78	37.73	97.6	119.1	83.4				7.67865e+06	9.37139e+06	6.5622e+06	High	High	High	1
FALSE	High	Master Protein	P14_v1_160032	ID:109591202 alr| Broad specificity amino-acid racemase [Pseudomonas sp. P14]	0	FALSE	81.589	45	14	18	45	14	409	44.2	7.69	126.03	14	0	0.564	8.927	9.575	0.0408724	4.23697e-06	0.000366364	14.49	30.81	98.44	103.7	193.7	2.6				3.68233e+06	6.87925e+06	92394.3	High	High	High	1
FALSE	High	Master Protein	P14_v1_1880001	ID:109594792 protein of unknown function [Pseudomonas sp. P14]	0	FALSE	81.243	51	15	19	80	11	359	41	6.27	242.52	15	1	0.931	0.472	0.637	0.981628	0.167883	0.69562	19	41.98	37.73	72	77.5	150.6				2.57795e+06	2.77506e+06	5.39487e+06	High	High	High	1
FALSE	High	Master Protein	P14_v1_130009	ID:109590954 accA| acetyl-CoA carboxyltransferase subunit alpha [Pseudomonas sp. P14]	0	FALSE	81.123	57	15	16	114	15	315	35.1	6.13	390.36	15	0	0.883	1.692	1.829	0.984666	0.899788	0.93347	9.81	28.2	36.07	108.8	121.5	69.6				2.11447e+07	2.36093e+07	1.35232e+07	High	High	High	1
FALSE	High	Master Protein	P14_v1_480022	ID:109592803 glmM| phosphoglucosamine mutase [Pseudomonas sp. P14]	0	FALSE	80.793	45	21	22	170	21	446	47.7	6.11	378.36	21	0	0.783	1.199	1.585	0.898103	0.989781	0.976549	21.74	31.03	26.86	94.1	126.4	79.4				3.39993e+07	4.56615e+07	2.86937e+07	High	High	High	1
FALSE	High	Master Protein	P14_v1_240063	ID:109591747 rplE| 50S ribosomal subunit protein L5 [Pseudomonas sp. P14]	0	FALSE	80.691	69	16	21	422	16	179	20.3	9.7	1127.5	16	0	0.856	1.234	1.313	0.962988	0.990692	0.986222	16.22	42.8	54.72	102.8	125	72.3				1.85188e+08	2.25127e+08	1.30169e+08	High	High	High	1
FALSE	High	Master Protein	P14_v1_600018	ID:109593197 ligA| DNA ligase [Pseudomonas sp. P14]	0	FALSE	80.69	31	21	21	62	21	776	84	5.59	179.44	21	0	0.914	1.592	1.796	0.973118	0.866553	0.852893	22.95	22.02	22.79	110	115.2	74.9				4.3272e+06	4.53175e+06	2.9458e+06	High	High	High	1
FALSE	High	Master Protein	P14_v1_130013	ID:109590958 kdsA| 3-deoxy-D-manno-octulosonate 8-phosphate synthase [Pseudomonas sp. P14]	0	FALSE	80.651	80	20	22	88	19	281	31	5.97	242.09	20	1	0.974	0.746	0.769	0.984666	0.542656	0.661209	16.87	33.91	37.68	90.8	93.2	116				1.57803e+07	1.61942e+07	2.017e+07	High	High	High	1
FALSE	High	Master Protein	P14_v1_80042	ID:109590505 srmB| ATP-dependent RNA helicase SrmB [Pseudomonas sp. P14]	0	FALSE	80.464	41	17	20	90	17	453	49.9	9.51	261.36	17	0	0.809	1.493	1.8	0.92833	0.949634	0.93347	17.38	11.21	25.31	99.8	128.9	71.2				1.36223e+07	1.75934e+07	9.718e+06	High	High	High	1
FALSE	High	Master Protein	P14_v1_830003	ID:109593845 Multidrug efflux transporter, RND family [Pseudomonas sp. P14]	0	FALSE	80.38	29	19	21	86	19	799	87.6	6.7	216.36	19	0	0.793	1.313	1.606	0.810773	0.98878	0.93347	25.57	19.84	29.74	101.2	122.5	76.3				5.96846e+06	7.22319e+06	4.49607e+06	High	High	High	1
FALSE	High	Master Protein	P14_v1_570021	ID:109593109 Chemotactic transducer-related protein [Pseudomonas sp. P14]	0	FALSE	79.92	28	22	23	62	22	968	107.4	6.55	170.11	22	0	1.387	1.413	0.995	0.330916	0.945413	0.971401	27.73	43.34	47.58	122.9	85	92.1				4.29807e+06	2.97277e+06	3.22145e+06	High	High	High	1
FALSE	High	Master Protein	P14_v1_280041	ID:109591958 Response regulator [Pseudomonas sp. P14]	0	FALSE	79.847	52	18	18	65	18	419	45.3	6.7	162.61	18	0	1.025	2.508	2.28	0.976747	0.295332	0.588969	25.62	42.66	45.75	129.3	122.4	48.3				7.10517e+06	6.72217e+06	2.65343e+06	High	High	High	1
FALSE	High	Master Protein	P14_v1_300041	ID:109592067 cycH| Cytochrome c-type biogenesis protein CycH [Pseudomonas sp. P14]	0	FALSE	79.814	66	20	20	62	20	398	43.2	5.2	176.31	20	0	1.14	1.437	1.29	0.895216	0.959519	0.986275	17.06	21.74	25.7	108.4	111.1	80.5				7.77197e+06	7.96017e+06	5.76912e+06	High	High	High	1
FALSE	High	Master Protein	P14_v1_20089	ID:109589482 putative transmembrane protein [Pseudomonas sp. P14]	0	FALSE	79.698	49	17	18	66	17	451	49.8	4.84	194.07	17	0	1.006	0.88	0.802	0.984666	0.912744	0.896324	21.5	39.35	63.4	93.9	99.8	106.3				2.6744e+06	2.8417e+06	3.02528e+06	High	High	High	1	Met-loss [N-Term]
FALSE	High	Master Protein	P14_v1_200062	ID:109591496 rplY| Large ribosomal subunit protein bL25 [Pseudomonas sp. P14]	0	FALSE	79.66	66	13	17	365	13	197	21.3	6.1	1169.84	13	0	0.913	1.448	1.622	0.990517	0.976279	0.971401	12.8	24.62	21.38	100.6	124	75.5				1.85095e+08	2.28115e+08	1.38874e+08	High	High	High	1	Met-loss [N-Term]
FALSE	High	Master Protein	P14_v1_140012	ID:109591049 copA| Cu(+) exporting P-type ATPase [Pseudomonas sp. P14]	0	FALSE	79.397	31	19	20	57	19	799	83.5	7.09	159.21	19	0	0.848	1.324	1.648	0.904505	0.964781	0.896324	20.72	39.25	28.2	106.3	127.3	66.4				4.71076e+06	5.64282e+06	2.94307e+06	High	High	High	1	Met-loss [N-Term]
FALSE	High	Master Protein	P14_v1_230003	ID:109591632 aminomethyltransferase [Pseudomonas sp. P14]	0	FALSE	79.364	52	16	16	112	15	373	40.3	6.39	350.17	16	1	0.889	2.032	2.092	0.984666	0.682333	0.864896	16.6	22.17	19.13	119.5	123.7	56.8				2.18235e+07	2.259e+07	1.03703e+07	High	High	High	1
FALSE	High	Master Protein	P14_v1_660016	ID:109593391 pyrD| dihydroorotate dehydrogenase, type 2 [Pseudomonas sp. P14]	0	FALSE	79.361	63	18	21	117	18	340	35.6	7.49	341.54	18	0	1.069	1.022	0.924	0.92833	0.924332	0.867537	10.64	26.01	29.26	105.4	92.5	102				1.45251e+07	1.27489e+07	1.40528e+07	High	High	High	1
FALSE	High	Master Protein	P14_v1_20156	ID:109589549 fbpA| Iron-utilization periplasmic protein [Pseudomonas sp. P14]	0	FALSE	79.33	56	14	18	128	14	337	36.8	5.38	342.64	14	0	0.954	0.897	1.154	0.986344	0.810749	0.962298	13.99	38.84	49.96	96.4	98.1	105.5				1.23403e+07	1.2561e+07	1.35032e+07	High	High	High	1
FALSE	High	Master Protein	P14_v1_20188	ID:109589581 parE| DNA topoisomerase IV subunit B [Pseudomonas sp. P14]	0	FALSE	79.142	33	19	19	79	19	634	69.5	6.23	216.39	19	0	0.748	1.3	1.759	0.635589	0.98878	0.896324	12.23	27.67	26.19	92.6	134.7	72.7				5.42022e+06	7.88512e+06	4.2541e+06	High	High	High	1
FALSE	High	Master Protein	P14_v1_1170006	ID:109594475 ppsR| phosphoenolpyruvate synthetase regulatory protein [Pseudomonas sp. P14]	0	FALSE	79.026	56	14	16	82	14	272	30.8	6.65	208.3	14	0	0.905	1.248	1.482	0.962994	0.996599	0.959397	16.66	28.06	35.65	96.9	112.7	90.4				5.63512e+06	6.55205e+06	5.25766e+06	High	High	High	1
FALSE	High	Master Protein	P14_v1_80079	ID:109590542 rluB| 23S rRNA pseudouridine(2605) synthase [Pseudomonas sp. P14]	0	FALSE	78.94	47	18	19	88	18	355	40	9.79	202.13	18	0	0.857	1.873	1.864	0.951844	0.763365	0.868028	24.3	36.76	60.21	110.8	125.9	63.3				1.00146e+07	1.13865e+07	5.72595e+06	High	High	High	1
FALSE	High	Master Protein	P14_v1_140053	ID:109591090 mpl| UDP-N-acetylmuramate--L-alanyl-gamma-D-glutamyl- meso-2,6-diaminoheptanedioate ligase [Pseudomonas sp. P14]	0	FALSE	78.917	47	13	17	96	13	449	48.2	6.23	313.93	13	0	0.98	1.007	1.125	0.985193	0.941308	0.97678	12.85	20.92	34.28	102.7	103.8	93.5				9.63218e+06	9.74009e+06	8.77075e+06	High	High	High	1
FALSE	High	Master Protein	P14_v1_1120009	ID:109594412 ABC transporter [Pseudomonas sp. P14]	0	FALSE	78.893	57	14	17	60	14	287	30.2	5.25	185.07	14	0	0.982	0.372	0.368	0.994001	0.0106581	0.09598	23.4	42.13	30.48	66.8	62	171.2				5.46512e+06	5.06871e+06	1.39942e+07	High	High	High	1
FALSE	High	Master Protein	P14_v1_390033	ID:109592460 pip| Proline iminopeptidase [Pseudomonas sp. P14]	0	FALSE	78.811	60	17	22	118	17	323	36.6	6.27	318.72	17	0	0.851	1.099	1.12	0.959555	0.964781	0.950296	19.64	24.2	37.05	100.5	107.3	92.2				1.33958e+07	1.42968e+07	1.22905e+07	High	High	High	1
FALSE	High	Master Protein	P14_v1_230005	ID:109591634 gcvP| glycine decarboxylase [Pseudomonas sp. P14]	0	FALSE	78.784	29	19	21	61	16	951	101.9	6.07	157.15	19	2	1.773	3.227	2.035	0.0196823	0.0453038	0.485743	25.82	45.42	44.62	172.6	78.8	48.7				3.49468e+06	1.59478e+06	985284	High	High	High	1
FALSE	High	Master Protein	P14_v1_560019	ID:109593074 ttgC| putative efflux pump outer membrane protein TtgC [Pseudomonas sp. P14]	0	FALSE	78.783	45	17	17	94	17	484	52.9	5.44	307.86	17	0	0.999	2.214	2.159	0.984666	0.502395	0.719883	10.48	13.19	32.44	123.7	123.4	52.9				9.19206e+06	9.16578e+06	3.93426e+06	High	High	High	1
FALSE	High	Master Protein	P14_v1_370036	ID:109592391 murD| UDP-N-acetylmuramoyl-L-alanine--D-glutamate ligase [Pseudomonas sp. P14]	0	FALSE	78.73	52	18	19	66	18	450	48.3	5.95	199.44	18	0	0.961	1.456	1.462	0.994001	0.960105	0.959397	19.57	49.41	47.94	111.9	122.2	65.9				7.49712e+06	8.18948e+06	4.41978e+06	High	High	High	1
FALSE	High	Master Protein	P14_v1_1420002	ID:109594673 Lipoprotein [Pseudomonas sp. P14]	0	FALSE	78.728	55	18	22	97	18	267	29.6	5.54	252.91	18	0	0.989	2.132	2.147	0.979569	0.594956	0.84705	23.42	19.6	50	117	129.2	53.8				3.23636e+07	3.57646e+07	1.48852e+07	High	High	High	1
FALSE	High	Master Protein	P14_v1_1260004	ID:109594561 leuD| 3-isopropylmalate dehydratase subunit LeuD [Pseudomonas sp. P14]	0	FALSE	78.72	71	14	15	84	14	214	24.3	5.62	265.07	14	0	1.628	3.765	2.542	0.087084	0.0229098	0.60209	15.52	27.09	31.33	154.8	105.8	39.4				2.0641e+07	1.41041e+07	5.24869e+06	High	High	High	1
FALSE	High	Master Protein	P14_v1_180006	ID:109591314 fadA| 3-ketoacyl-CoA thiolase [Pseudomonas sp. P14]	0	FALSE	78.604	49	12	15	97	12	391	41.5	7.03	292.99	12	0	1.309	1.217	0.908	0.543268	0.992766	0.906924	15.89	34.96	17.97	112.6	88.9	98.5				1.08403e+07	8.56301e+06	9.48067e+06	High	High	High	1
FALSE	High	Master Protein	P14_v1_440011	ID:109592639 pcnB| poly(A) polymerase I [Pseudomonas sp. P14]	0	FALSE	78.433	38	20	22	92	20	460	52.7	9.17	192.35	20	0	1.012	1.317	1.292	0.981628	0.98878	0.994473	22.47	27.94	19.18	105.1	108.7	86.2				8.09461e+06	8.37058e+06	6.63355e+06	High	High	High	1
FALSE	High	Master Protein	P14_v1_310003	ID:109592082 ppiB| peptidyl-prolyl cis-trans isomerase B [Pseudomonas sp. P14]	0	FALSE	78.431	73	14	20	218	14	196	21.7	7.12	532.79	14	0	0.872	1.235	1.366	0.979569	0.990692	0.996891	17.94	29.75	26.51	96	113.3	90.6				5.95422e+07	7.02543e+07	5.61914e+07	High	High	High	1
FALSE	High	Master Protein	P14_v1_20183	ID:109589576 membrane protein [Pseudomonas sp. P14]	0	FALSE	78.302	40	18	19	81	17	485	53.6	5.05	194.43	18	0	1.17	0.807	0.701	0.828206	0.811467	0.775827	15.51	38.89	27.54	98.5	91.6	109.9				4.50377e+06	4.18593e+06	5.02521e+06	High	High	High	1
FALSE	High	Master Protein	P14_v1_240011	ID:109591695 ribB| 3,4-dihydroxy-2-butanone 4-phosphate synthase [Pseudomonas sp. P14]	0	FALSE	78.302	50	15	18	168	14	363	39.2	5.25	321.59	15	1	0.739	1.702	2.343	0.811516	0.890917	0.758836	13.66	63.3	68.18	104.1	140.2	55.7				2.07884e+07	2.79972e+07	1.11238e+07	High	High	High	1
FALSE	High	Master Protein	P14_v1_60039	ID:109590233 Isocitrate lyase/phosphoenolpyruvate mutase family protein [Pseudomonas sp. P14]	0	FALSE	78.197	75	15	17	101	15	269	28.4	5.6	328.2	15	0	0.689	0.855	1.25	0.634955	0.76513	0.976549	14.62	14.5	48.77	83.4	126.9	89.7				1.21215e+07	1.84548e+07	1.30429e+07	High	High	High	1	Met-loss [N-Term]
FALSE	High	Master Protein	P14_v1_1460003	ID:109594702 putative beta-barrel assembly-enhancing protease [Pseudomonas sp. P14]	0	FALSE	78.187	47	20	21	84	20	478	53.2	6.92	217.49	20	0	1.11	1.084	1.07	0.895216	0.956391	0.929948	17.06	26.59	43.18	102.4	116	81.5				2.03319e+07	2.30235e+07	1.61821e+07	High	High	High	1
FALSE	High	Master Protein	P14_v1_1230001	ID:109594532 dapb| Dipeptidyl aminopeptidase BI [Pseudomonas sp. P14]	0	FALSE	78.132	31	15	16	64	15	680	75.8	5.05	179.45	15	0	0.887	1.223	1.456	0.951522	0.990397	0.944122	11.81	40.25	28.62	105.9	122.1	72				4.10757e+06	4.73661e+06	2.79413e+06	High	High	High	1	Met-loss [N-Term]
FALSE	High	Master Protein	P14_v1_60024	ID:109590218 TIGR04255 family protein [Pseudomonas sp. P14]	0	FALSE	77.774	57	13	16	112	13	291	32.7	5.22	365.91	13	0	0.814	1.032	1.186	0.929506	0.934318	0.959397	22.55	37.81	51.1	90.6	111.8	97.6				1.74972e+07	2.15951e+07	1.88561e+07	High	High	High	1
FALSE	High	Master Protein	P14_v1_800011	ID:109593772 glycine betaine/proline transport system substrate-binding protein [Pseudomonas sp. P14]	0	FALSE	77.75	58	16	17	90	16	338	36.9	5.85	267.72	16	0	1.185	0.531	0.516	0.810278	0.167194	0.403838	12.43	32.7	32.98	77.2	60.4	162.4				4.68041e+06	3.66094e+06	9.8384e+06	High	High	High	1
FALSE	High	Master Protein	P14_v1_540012	ID:109593007 preA| NAD-dependent dihydropyrimidine dehydrogenase subunit PreA [Pseudomonas sp. P14]	0	FALSE	77.674	56	17	19	63	17	424	46.1	5.45	179.62	17	0	0.866	28.718	36.708	0.936203	1.81991e-14	2.61749e-10	14.22	79.73	54.25	135.6	161.4	2.9				5.77174e+06	6.87119e+06	125430	High	High	High	1	Met-loss [N-Term]
FALSE	High	Master Protein	P14_v1_860021	ID:109593932 d2hgdh| D-2-hydroxyglutarate dehydrogenase [Pseudomonas sp. P14]	0	FALSE	77.612	49	19	20	103	19	465	51.1	5.41	261.67	19	0	1.168	0.783	0.717	0.845936	0.672637	0.708391	18.28	32.65	34.19	93.5	88.6	117.9				9.25647e+06	8.7705e+06	1.16658e+07	High	High	High	1	Met-loss [N-Term]
FALSE	High	Master Protein	P14_v1_680022	ID:109593459 mnmA| tRNA-specific 2-thiouridylase [Pseudomonas sp. P14]	0	FALSE	77.588	49	15	16	83	15	374	41.5	5.72	223.85	15	0	0.918	0.975	0.997	0.976239	0.948129	0.959397	20.24	22.9	23.03	97.2	99.9	102.8				4.69046e+06	4.82066e+06	4.95842e+06	High	High	High	1
FALSE	High	Master Protein	P14_v1_20072	ID:109589465 dacC| D-alanyl-D-alanine carboxypeptidase DacC [Pseudomonas sp. P14]	0	FALSE	77.563	58	15	19	130	15	386	42.3	6.62	403.04	15	0	1.021	1.258	1.211	0.95737	0.996599	0.975856	9.85	35.17	32.7	107.4	104.8	87.8				1.50454e+07	1.46709e+07	1.22917e+07	High	High	High	1
FALSE	High	Master Protein	P14_v1_240065	ID:109591749 rplN| 50S ribosomal subunit protein L14 [Pseudomonas sp. P14]	0	FALSE	77.561	67	12	27	272	12	122	13.4	10.93	675.06	12	0	0.84	1.544	1.605	0.951844	0.949634	0.973839	14.3	70.36	79.61	108.3	120.1	71.6				1.95454e+08	2.16761e+08	1.2924e+08	High	High	High	1
FALSE	High	Master Protein	P14_v1_20162	ID:109589555 Protein HflC [Pseudomonas sp. P14]	0	FALSE	77.241	53	19	20	155	19	289	33	9.26	396.99	19	0	1.299	1.103	0.834	0.530638	0.964781	0.743373	8.13	34.98	37.69	109.8	87	103.2				5.25468e+07	4.16439e+07	4.93734e+07	High	High	High	1
FALSE	High	Master Protein	P14_v1_30083	ID:109589715 mnmG| 5-carboxymethylaminomethyluridine-tRNA synthase subunit MnmG [Pseudomonas sp. P14]	0	FALSE	77.233	33	17	18	57	17	630	69.4	6.46	153.27	17	0	0.902	1.279	1.457	0.961111	0.976559	0.944122	16.96	21.29	26.65	109.1	115.6	75.4				4.60177e+06	4.87613e+06	3.18017e+06	High	High	High	1
FALSE	High	Master Protein	P14_v1_450033	ID:109592699 yhiI| putative membrane fusion protein YhiI [Pseudomonas sp. P14]	0	FALSE	77.053	47	12	15	96	12	319	34.5	9.13	316.73	12	0	0.931	3.401	3.85	0.99807	0.0524211	0.186177	15.05	6.78	19.73	126.5	142.3	31.1				1.76232e+07	1.98238e+07	4.33635e+06	High	High	High	1
FALSE	High	Master Protein	P14_v1_20145	ID:109589538 nadE| NH3-dependent NAD(+) synthetase [Pseudomonas sp. P14]	0	FALSE	76.969	61	13	17	129	13	275	29.2	5.82	440.63	13	0	1.124	2.025	1.61	0.883489	0.687274	0.972265	16.75	23.3	40.6	124.2	109.7	66				2.99196e+07	2.64204e+07	1.59033e+07	High	High	High	1
FALSE	High	Master Protein	P14_v1_600019	ID:109593198 zipA| Cell division protein ZipA [Pseudomonas sp. P14]	0	FALSE	76.949	54	11	15	82	11	297	32.8	5.88	263.8	11	0	1.182	1.245	0.972	0.816713	0.999657	0.935011	18.64	17.21	33.13	108.5	96.4	95.1				1.03429e+07	9.18811e+06	9.05911e+06	High	High	High	1
FALSE	High	Master Protein	P14_v1_400012	ID:109592477 diguanylate cyclase [Pseudomonas sp. P14]	0	FALSE	76.928	70	20	20	69	20	345	38.6	6	230.59	20	0	1.134	1.143	1.07	0.878629	0.982006	0.951177	16.63	46.41	31.8	109.5	95.1	95.4				1.21948e+07	1.05925e+07	1.06174e+07	High	High	High	1	Met-loss [N-Term]
FALSE	High	Master Protein	P14_v1_510036	ID:109592921 ornithine decarboxylase [Pseudomonas sp. P14]	0	FALSE	76.907	56	18	18	113	18	387	43.5	5.07	322.94	18	0	1.098	1.988	1.823	0.902239	0.696392	0.881188	27.4	26.06	27.29	132.1	110.8	57				1.30961e+07	1.09885e+07	5.65499e+06	High	High	High	1	Met-loss [N-Term]
FALSE	High	Master Protein	P14_v1_220020	ID:109591584 mltG| Endolytic murein transglycosylase [Pseudomonas sp. P14]	0	FALSE	76.692	49	15	21	64	15	411	46	5.38	185.93	15	0	1.032	0.734	0.664	0.984666	0.808478	0.7511	33.19	18.67	32.99	87.1	87.5	125.5				1.87826e+06	1.88702e+06	2.70638e+06	High	High	High	1
FALSE	High	Master Protein	P14_v1_430030	ID:109592617 bkdA| 2-oxoisovalerate dehydrogenase subunit beta [Pseudomonas sp. P14]	0	FALSE	76.685	45	10	13	108	10	352	38.6	5.4	287.69	10	0	1.1	3.631	3.78	0.904071	0.0338054	0.166936	20.52	61.62	40.13	139.4	127	33.6				1.22073e+07	1.11284e+07	2.94359e+06	High	High	High	1
FALSE	High	Master Protein	P14_v1_600023	ID:109593202 xanthine dehydrogenase large subunit [Pseudomonas sp. P14]	0	FALSE	76.529	33	21	22	48	21	799	88	6.4	129.94	21	0	0.978	1.044	1.336	0.999405	0.987039	0.972265	28.05	27.81	28.63	107.3	112.3	80.4				3.39061e+06	3.54701e+06	2.53854e+06	High	High	High	1
FALSE	High	Master Protein	P14_v1_450002	ID:109592668 potG| putrescine ABC transporter ATP binding subunit [Pseudomonas sp. P14]	0	FALSE	76.395	43	12	20	119	12	380	42.5	6.4	224.06	12	0	1.213	0.696	0.697	0.767819	0.503109	0.708347	17.54	35.21	35.76	97.7	81.5	120.8				8.5293e+06	7.11846e+06	1.05495e+07	High	High	High	1
FALSE	High	Master Protein	P14_v1_1120012	ID:109594415 ABC transporter substrate-binding protein [Pseudomonas sp. P14]	0	FALSE	76.353	71	14	16	88	14	300	32.8	7.21	291.62	14	0	1.249	0.394	0.346	0.668918	0.0128444	0.0770309	16.07	17.5	30.8	68.2	55.1	176.7				6.33748e+06	5.12725e+06	1.64277e+07	High	High	High	1
FALSE	High	Master Protein	P14_v1_320012	ID:109592148 phosphonate transport system substrate-binding protein [Pseudomonas sp. P14]	0	FALSE	76.323	69	18	20	116	18	284	31.1	8.29	314.79	18	0	0.999	1.389	1.453	0.973118	0.98878	0.996963	11.35	42.32	45.2	107.7	108.3	83.9				3.51465e+07	3.53477e+07	2.73915e+07	High	High	High	1
FALSE	High	Master Protein	P14_v1_190032	ID:109591409 aroB| 3-dehydroquinate synthase [Pseudomonas sp. P14]	0	FALSE	76.008	59	17	18	82	17	376	40.7	6.24	263.47	17	0	0.858	1.257	1.594	0.962994	0.999657	0.971401	13.82	23.08	25.69	101.5	117.2	81.2				1.38546e+07	1.59976e+07	1.10822e+07	High	High	High	1
FALSE	High	Master Protein	P14_v1_460026	ID:109592729 rpoN| RNA polymerase, sigma 54 (sigma N) factor [Pseudomonas sp. P14]	0	FALSE	75.882	44	20	21	64	20	489	55.3	4.75	168.79	20	0	0.927	1.634	1.576	0.985193	0.890393	0.937319	21.99	27.92	48.89	108.9	129.2	61.9				8.45448e+06	1.00262e+07	4.80217e+06	High	High	High	1
FALSE	High	Master Protein	P14_v1_1250003	ID:109594556 8-amino-7-oxononanoate synthase [Pseudomonas sp. P14]	0	FALSE	75.8	45	16	20	54	16	450	49.2	7.36	155.85	16	0	0.804	0.871	1.163	0.808474	0.941308	0.988477	23.15	31.91	34.06	94.2	111.6	94.3				2.0522e+06	2.43109e+06	2.05454e+06	High	High	High	1
FALSE	High	Master Protein	P14_v1_1040006	ID:109594298 kdgK| 2-dehydro-3-deoxygluconokinase [Pseudomonas sp. P14]	0	FALSE	75.655	69	18	19	44	18	316	33.6	5.86	115.15	18	0	0.111	100	100	1.64131e-16	1.38203e-16	1.15948e-16	0			0.9	299.1					60804.7	1.96992e+07		Peak Found	High	Peak Found	1
FALSE	High	Master Protein	P14_v1_390015	ID:109592442 ubiB| ubiquinone biosynthesis protein UbiB [Pseudomonas sp. P14]	0	FALSE	75.654	40	19	20	56	19	540	61.6	8.84	131.84	19	0	0.91	1.347	1.392	0.961475	0.948129	0.951177	12.74	22.96	23.07	95.7	118.7	85.6				2.40709e+06	2.98685e+06	2.15276e+06	High	High	High	1
FALSE	High	Master Protein	P14_v1_20003	ID:109589396 Protein kinase [Pseudomonas sp. P14]	0	FALSE	75.572	19	23	23	50	23	1386	154.7	6.93	118.48	23	0	0.852	1.221	1.437	0.904505	0.976559	0.914402	19.59	30.46	31.84	102.4	124	73.6				2.01896e+06	2.44582e+06	1.45186e+06	High	High	High	1
FALSE	High	Master Protein	P14_v1_900001	ID:109594008 pyrC| Dihydroorotase-like protein [Pseudomonas sp. P14]	0	FALSE	75.367	50	13	14	75	13	423	44.1	5.66	235.77	13	0	0.948	1.898	2.002	0.989511	0.751404	0.840147	13.9	48.93	30.67	109.3	118.6	72.1				1.28798e+07	1.39688e+07	8.49756e+06	High	High	High	1
FALSE	High	Master Protein	P14_v1_900016	ID:109594023 bioA| Adenosylmethionine-8-amino-7-oxononanoate aminotransferase [Pseudomonas sp. P14]	0	FALSE	75.321	50	17	18	64	17	468	52.4	6.13	171.04	17	0	0.973	1.007	0.933	0.996828	0.964781	0.944122	18.67	28.2	25.3	103.3	104	92.7				4.67046e+06	4.70132e+06	4.19049e+06	High	High	High	1
FALSE	High	Master Protein	P14_v1_130089	ID:109591034 long-chain fatty acid transport protein [Pseudomonas sp. P14]	0	FALSE	75.291	41	13	14	101	13	426	46.1	6.2	247.92	13	0	2.424	1.211	0.566	0.000215592	0.989781	0.48501	27.47	42.87	47.63	138.2	56.3	105.5				1.57216e+07	6.41106e+06	1.20032e+07	High	High	High	1
FALSE	High	Master Protein	P14_v1_110094	ID:109590861 proB| Glutamate 5-kinase [Pseudomonas sp. P14]	0	FALSE	75.284	48	13	15	69	13	372	39.6	7.61	230.85	13	0	0.819	1.648	2.029	0.905249	0.890393	0.793676	9.79	35.58	35.32	101.9	132.4	65.7				7.77348e+06	1.01039e+07	5.01324e+06	High	High	High	1
FALSE	High	Master Protein	P14_v1_280019	ID:109591936 thioredoxin-dependent peroxiredoxin [Pseudomonas sp. P14]	0	FALSE	75.117	69	13	16	129	13	212	23.9	6.07	348.12	13	0	0.535	1.198	2.442	0.0951997	0.989781	0.718922	7.75	34.77	38.78	79.3	148	72.7				3.18309e+07	5.93975e+07	2.91858e+07	High	High	High	1
FALSE	High	Master Protein	P14_v1_60062	ID:109590256 cbbS| Ribulose bisphosphate carboxylase small subunit [Pseudomonas sp. P14]	0	FALSE	75.096	90	12	16	135	12	119	13.7	6.93	368.09	12	0	0.232	0.01	0.029	3.25602e-10	1.38203e-16	3.812e-14	64.3	48.51	19.52	1.2	5.8	293				601537	2.83119e+06	1.42773e+08	High	High	High	1	Met-loss [N-Term]
FALSE	High	Master Protein	P14_v1_790027	ID:109593760 tyrB| tyrosine aminotransferase [Pseudomonas sp. P14]	0	FALSE	75.062	46	14	15	103	14	398	43.6	5.86	338.99	14	0	0.842	1.216	1.352	0.954962	0.989781	0.99422	10.58	32.69	35.39	96.1	118.2	85.6				1.56817e+07	1.92903e+07	1.39721e+07	High	High	High	1
FALSE	High	Master Protein	P14_v1_10220	ID:109589236 Aldo/keto reductase family oxidoreductase [Pseudomonas sp. P14]	0	FALSE	74.948	56	14	17	75	14	336	36.8	6.7	235.76	14	0	1.075	1.151	1.005	0.924574	0.986216	0.93347	17.51	35.57	22.11	106.2	97	96.8				1.25337e+07	1.14487e+07	1.14284e+07	High	High	High	1
FALSE	High	Master Protein	P14_v1_590027	ID:109593176 rfbB| dTDP-glucose 4,6-dehydratase 1 [Pseudomonas sp. P14]	0	FALSE	74.932	60	14	19	113	14	356	39.9	6.24	310.93	14	0	1.047	1.214	1.224	0.958614	0.999657	0.999424	18.07	30.79	29.72	107.3	104.3	88.4				7.05805e+06	6.86105e+06	5.81636e+06	High	High	High	1
FALSE	High	Master Protein	P14_v1_160008	ID:109591178 glcD| glycolate dehydrogenase, putative FAD-linked subunit [Pseudomonas sp. P14]	0	FALSE	74.881	52	20	20	38	20	499	53.5	5.33	105.24	20	0	1.513	0.076	0.027	0.488535	8.536e-12	5.77813e-12	21.31	78.27	16.57	6.6	2.5	290.9				272065	101660	1.20003e+07	High	High	High	1
FALSE	High	Master Protein	P14_v1_940022	ID:109594129 multidrug efflux pump [Pseudomonas sp. P14]	0	FALSE	74.621	24	20	20	48	20	1021	112.8	7.24	122.24	20	0	0.24	1.309	5.442	8.66775e-13	0.952025	0.017572	20.63	44.07	41.6	43.6	232.8	23.5				1.08105e+06	5.76714e+06	582412	High	High	High	1
FALSE	High	Master Protein	P14_v1_1010006	ID:109594248 dctD| C4-dicarboxylate transport transcriptional regulatory protein DctD [Pseudomonas sp. P14]	0	FALSE	74.617	43	14	16	38	14	468	51	6.02	132.01	14	0	0.909	0.928	0.985	0.958614	0.967567	0.976549	34.96	21.89	47.9	94.1	98.9	107				1.6338e+06	1.71666e+06	1.8573e+06	High	High	High	1	Met-loss [N-Term]
FALSE	High	Master Protein	P14_v1_20006	ID:109589399 Predicted ATPase [Pseudomonas sp. P14]	0	FALSE	74.611	39	14	16	53	14	445	49.5	6.86	155.22	14	0	0.787	1.453	1.689	0.767819	0.919793	0.892977	18.01	27.99	44.43	98.5	124.3	77.2				3.45011e+06	4.35581e+06	2.70559e+06	High	High	High	1
FALSE	High	Master Protein	P14_v1_1050003	ID:109594310 rpsG| 30S ribosomal subunit protein S7 [Pseudomonas sp. P14]	0	FALSE	74.54	67	15	19	305	15	156	17.6	10.15	789.07	15	0	0.944	1.388	1.564	0.990588	0.98878	0.976549	14.28	33.21	32.86	104.1	116.9	79				2.17315e+08	2.44164e+08	1.6492e+08	High	High	High	1
FALSE	High	Master Protein	P14_v1_750020	ID:109593633 Butyryl-CoA dehydrogenase [Pseudomonas sp. P14]	0	FALSE	74.332	57	17	18	55	17	354	38.5	6.19	169.5	17	0	1.111	0.873	0.899	0.916791	0.863723	0.926846	12.17	39.63	39.13	101.3	98.8	99.8				6.45355e+06	6.29323e+06	6.35719e+06	High	High	High	1
FALSE	High	Master Protein	P14_v1_400022	ID:109592487 infC| translation initiation factor IF-3 [Pseudomonas sp. P14]	0	FALSE	74.273	61	11	18	186	11	183	20.9	9.39	588.38	11	0	0.862	1.338	1.421	0.968973	0.990692	0.999424	15.69	26.78	44.81	109.3	121.3	69.4				7.05659e+07	7.83595e+07	4.48332e+07	High	High	High	1
FALSE	High	Master Protein	P14_v1_130052	ID:109590997 gacS| Sensor histidine kinase GacS [Pseudomonas sp. P14]	0	FALSE	74.157	24	18	21	51	17	917	100.5	5.66	144.06	18	0	1.077	0.632	0.647	0.952667	0.558733	0.731275	12.89	52.87	38.95	95.9	89.1	115				2.36829e+06	2.20157e+06	2.83907e+06	High	High	High	1
FALSE	High	Master Protein	P14_v1_1030018	ID:109594291 prfA| peptide chain release factor RF1 [Pseudomonas sp. P14]	0	FALSE	74.124	49	14	16	54	14	360	40.3	5.11	151.01	14	0	0.731	1.637	2.104	0.550262	0.847948	0.682586	21.28	38.18	39.24	98.5	139.8	61.6				4.43109e+06	6.29007e+06	2.77281e+06	High	High	High	1
FALSE	High	Master Protein	P14_v1_20161	ID:109589554 hisZ| ATP phosphoribosyltransferase regulatory subunit [Pseudomonas sp. P14]	0	FALSE	73.962	45	16	17	85	16	395	42.9	5.11	254.95	16	0	0.694	1.129	1.558	0.647404	0.975244	0.977897	16.71	33.12	19.14	92.2	125	82.8				1.33843e+07	1.81373e+07	1.20103e+07	High	High	High	1	Met-loss [N-Term]
FALSE	High	Master Protein	P14_v1_710020	ID:109593531 putative glucosyl transferase [Pseudomonas sp. P14]	0	FALSE	73.889	25	20	21	64	20	863	97.3	7.83	141.03	20	0	1.122	0.749	0.652	0.923639	0.774814	0.730604	20.19	35.98	60.58	92.4	86.1	121.4				2.39288e+06	2.23029e+06	3.14396e+06	High	High	High	1
FALSE	High	Master Protein	P14_v1_170043	ID:109591284 potA| Spermidine/putrescine import ATP-binding protein PotA [Pseudomonas sp. P14]	0	FALSE	73.855	52	16	18	52	15	374	41.2	6.61	169.34	16	1	1.098	0.644	0.482	0.951844	0.619348	0.399146	16.19	31.45	37.39	78	83.6	138.3				1.77186e+06	1.89921e+06	3.14144e+06	High	High	High	1
FALSE	High	Master Protein	P14_v1_240058	ID:109591742 rpsE| 30S ribosomal subunit protein S5 [Pseudomonas sp. P14]	0	FALSE	73.809	67	13	19	204	13	166	17.7	9.99	591.21	13	0	0.776	1.542	1.639	0.895216	0.949634	0.970101	19.78	23.38	32.81	103.4	130.9	65.7				1.97878e+08	2.50609e+08	1.25677e+08	High	High	High	1
FALSE	High	Master Protein	P14_v1_900018	ID:109594025 monoamine oxidase [Pseudomonas sp. P14]	0	FALSE	73.725	38	20	20	56	20	622	66.2	9.66	150.23	20	0	1.03	2.583	2.443	0.973118	0.231119	0.506945	13.07	25.99	30.68	128.6	124.6	46.8				7.04092e+06	6.82203e+06	2.56097e+06	High	High	High	1
FALSE	High	Master Protein	P14_v1_20179	ID:109589572 putative signal transduction protein [Pseudomonas sp. P14]	0	FALSE	73.676	40	17	17	66	17	511	57.7	7.68	205.21	17	0	1.008	1.236	1.151	0.984666	0.989781	0.999424	10.85	23.92	11.25	108.5	108.8	82.7				3.79353e+06	3.80189e+06	2.89132e+06	High	High	High	1
FALSE	High	Master Protein	P14_v1_170011	ID:109591252 pqqB| Coenzyme PQQ synthesis protein B [Pseudomonas sp. P14]	0	FALSE	73.581	59	12	20	119	12	303	33.3	5.74	318.37	12	0	3.238	0.251	0.084	3.04016e-09	0.000147144	1.87749e-06	22.78	29.01	49.74	61.2	15.2	223.6				4.53881e+06	1.12517e+06	1.65843e+07	High	High	High	1
FALSE	High	Master Protein	P14_v1_1720001	ID:109594774 acetolactate synthase I/II/III large subunit [Pseudomonas sp. P14]	0	FALSE	73.462	40	15	17	95	15	547	60	6.14	260.19	15	0	0.839	2.386	2.877	0.951844	0.39535	0.456671	30.21	30.22	46.56	117.8	141.6	40.6				1.2882e+07	1.54814e+07	4.4366e+06	High	High	High	1
FALSE	High	Master Protein	P14_v1_1290007	ID:109594589 fbp| Fructose-1,6-bisphosphatase class 1 [Pseudomonas sp. P14]	0	FALSE	73.447	52	15	17	154	14	336	37.2	6.01	414.89	15	0	1.043	1.364	1.354	0.947614	0.989781	0.994668	21.19	36.31	49.46	107.1	115.8	77				2.65776e+07	2.87287e+07	1.91094e+07	High	High	High	1
FALSE	High	Master Protein	P14_v1_490018	ID:109592831 dfp| fused 4'-phosphopantothenoylcysteine decarboxylase and phosphopantothenoylcysteine synthetase [Pseudomonas sp. P14]	0	FALSE	73.417	61	14	16	73	14	403	43.1	6.8	248.52	14	0	0.859	1.111	1.188	0.914241	0.996599	0.996963	23.18	28.36	39.88	97.3	113.4	89.3				2.94499e+06	3.43131e+06	2.70105e+06	High	High	High	1
FALSE	High	Master Protein	P14_v1_280016	ID:109591933 ssuD| FMNH2-dependent alkanesulfonate monooxygenase [Pseudomonas sp. P14]	0	FALSE	73.399	54	14	14	38	14	382	41.5	5.82	104.72	14	0	0.022	0.391	30.898	1.64131e-16	0.246067	5.24267e-10	285.24	102.47	28.73	3	288.9	8.1				108360	1.05307e+07	296053	High	High	High	1
FALSE	High	Master Protein	P14_v1_640026	ID:109593336 zinc protease [Pseudomonas sp. P14]	0	FALSE	73.239	42	17	17	74	17	496	52.4	7.69	210.43	17	0	1.007	1.267	1.153	0.984666	0.989781	0.999424	18.62	32.17	36.76	106.3	110.4	83.4				5.22827e+06	5.42923e+06	4.10039e+06	High	High	High	1
FALSE	High	Master Protein	P14_v1_80053	ID:109590516 aer| Methyl-accepting chemotaxis protein Aer [Pseudomonas sp. P14]	0	FALSE	73.118	44	18	21	66	17	521	56.6	6.39	213.11	18	0	1.619	0.592	0.369	0.0659323	0.27625	0.0906475	15.72	22.72	19.15	88.4	55.6	156				6.37293e+06	4.00888e+06	1.12474e+07	High	High	High	1
FALSE	High	Master Protein	P14_v1_90100	ID:109590669 two-component system, chemotaxis family, sensor histidine kinase and response regulator WspE [Pseudomonas sp. P14]	0	FALSE	73.069	37	21	21	55	21	762	83.1	5.36	131.23	21	0	1.287	0.773	0.611	0.72636	0.830102	0.666449	30.1	24.47	26.92	92.9	71.5	135.6				2.1391e+06	1.64724e+06	3.12138e+06	High	High	High	1
FALSE	High	Master Protein	P14_v1_160006	ID:109591176 glcF| glycolate dehydrogenase, putative iron-sulfur subunit [Pseudomonas sp. P14]	0	FALSE	73.065	46	14	16	31	14	411	44.7	8.24	99.16	14	0	1.326	0.065	0.048	0.785065	3.08585e-11	5.70669e-09	5.7	4.79	3.34	9.5	4.7	285.9				243066	119242	7.32108e+06	High	High	High	1
FALSE	High	Master Protein	P14_v1_230042	ID:109591671 pgl| 6-phosphogluconolactonase [Pseudomonas sp. P14]	0	FALSE	72.976	61	13	16	90	13	237	25	6.73	295.38	13	0	0.043	0.731	19.79	1.64131e-16	0.775512	8.275e-07	22.55	10.93	17.74	7	279.8	13.2				1.81971e+06	7.30615e+07	3.44409e+06	High	High	High	1
FALSE	High	Master Protein	P14_v1_940003	ID:109594110 Flavohemoglobin expression-modulating QEGLA motif protein [Pseudomonas sp. P14]	0	FALSE	72.82	36	16	20	70	16	425	47.7	5.82	180.18	16	0	1.015	1.02	0.836	0.983865	0.949634	0.868028	22.17	26.6	37.67	105.1	100.9	94				8.13408e+06	7.81216e+06	7.2714e+06	High	High	High	1
FALSE	High	Master Protein	P14_v1_540001	ID:109592996 dch| Bifunctional esterase/perhydrolase DCH [Pseudomonas sp. P14]	0	FALSE	72.799	57	9	15	108	9	276	30.2	6.4	357.74	9	0	1.453	0.683	0.442	0.252062	0.403905	0.110722	9.32	21.4	29.01	93.6	62	144.4				2.50202e+07	1.65741e+07	3.86139e+07	High	High	High	1
FALSE	High	Master Protein	P14_v1_800022	ID:109593783 qumA| putative quinate dehydrogenase (quinone) [Pseudomonas sp. P14]	0	FALSE	72.767	26	16	16	64	16	805	85.3	7.14	157.49	16	0	1.283	0.604	0.474	0.635731	0.470063	0.359874	21.05	31.39	25.1	95.5	62	142.5				2.6908e+06	1.74634e+06	4.01199e+06	High	High	High	1
FALSE	High	Master Protein	P14_v1_500016	ID:109592868 lysA| Diaminopimelate decarboxylase [Pseudomonas sp. P14]	0	FALSE	72.752	52	17	18	91	17	415	45.2	5.25	224.41	17	0	0.933	1.788	1.79	0.986584	0.805284	0.881188	16.41	25.38	36.22	117	121	62				8.90592e+06	9.21378e+06	4.7173e+06	High	High	High	1
FALSE	High	Master Protein	P14_v1_260025	ID:109591839 Ferredoxin-dependent glutamate synthase [Pseudomonas sp. P14]	0	FALSE	72.738	45	17	18	64	17	539	59.1	8	186.32	17	0	1.084	3.1	3.261	0.939049	0.082747	0.240269	19.8	49.04	21.21	135.4	126.6	37.9				5.24769e+06	4.90586e+06	1.47032e+06	High	High	High	1
FALSE	High	Master Protein	P14_v1_1480002	ID:109594711 thiI| tRNA uridine 4-sulfurtransferase [Pseudomonas sp. P14]	0	FALSE	72.651	40	15	16	44	15	484	54.9	6.9	119.77	15	0	0.841	1.2	1.655	0.897322	0.980679	0.852893	15.6	29.33	48.99	100.3	125.3	74.5				2.32682e+06	2.90678e+06	1.72815e+06	High	High	High	1
FALSE	High	Master Protein	P14_v1_650028	ID:109593371 Glycerol-3-phosphate O-acyltransferase [Pseudomonas sp. P14]	0	FALSE	72.625	43	13	16	37	13	388	43.8	7.27	133.08	13	0	0.747	0.785	1.011	0.635589	0.883996	0.981811	20.15	24.16	22.34	89.3	116.1	94.6				1.69797e+06	2.20755e+06	1.79808e+06	High	High	High	1
FALSE	High	Master Protein	P14_v1_360034	ID:109592348 pal| Peptidoglycan-associated lipoprotein [Pseudomonas sp. P14]	0	FALSE	72.468	72	10	17	192	10	166	17.8	5.24	766.85	10	0	1.137	1.461	1.774	0.868379	0.975244	0.941597	23.43	64.5	33.42	121.5	118.4	60.2				1.01703e+08	9.9107e+07	5.03892e+07	High	High	High	1
FALSE	High	Master Protein	P14_v1_830015	ID:109593857 p-47 [Pseudomonas sp. P14]	0	FALSE	72.413	43	13	16	123	13	410	44.7	5.92	334.52	13	0	0.985	2.889	2.617	0.980603	0.18083	0.645332	11.47	36.14	26.63	127.6	129.6	42.8				3.59893e+07	3.65417e+07	1.20709e+07	High	High	High	1
FALSE	High	Master Protein	P14_v1_430021	ID:109592608 two-component system, chemotaxis family, chemotaxis protein CheV [Pseudomonas sp. P14]	0	FALSE	72.404	62	17	18	91	17	309	34.5	6.25	243.4	17	0	0.935	0.646	0.79	0.994001	0.301476	0.744401	18.2	32.42	40.63	87.2	92.1	120.7				1.03665e+07	1.09536e+07	1.43458e+07	High	High	High	1	Met-loss [N-Term]
FALSE	High	Master Protein	P14_v1_10306	ID:109589322 gcvP| glycine decarboxylase [Pseudomonas sp. P14]	0	FALSE	72.339	25	16	17	44	11	954	103.2	6.21	106	16	1	1.077	0.196	0.183	0.980197	0.000397086	0.00145763	4.77	24.25	42.48	20.6	19.6	259.8				148238	140723	1.8693e+06	High	High	High	1
FALSE	High	Master Protein	P14_v1_200060	ID:109591494 ychF| redox-responsive ATPase YchF [Pseudomonas sp. P14]	0	FALSE	72.239	48	12	16	79	12	366	39.9	5.07	223.82	12	0	0.823	2.478	2.792	0.941277	0.317339	0.532583	17.01	24	37.55	108.5	137.5	54				1.39576e+07	1.76911e+07	6.94212e+06	High	High	High	1	Met-loss [N-Term]
FALSE	High	Master Protein	P14_v1_40032	ID:109589874 amidase [Pseudomonas sp. P14]	0	FALSE	72.195	39	16	20	70	16	567	60.3	4.94	209.26	16	0	0.949	1.121	1.167	0.984666	0.989781	0.996963	17.52	33.58	28.91	101.4	114.5	84.1				5.16889e+06	5.83472e+06	4.28319e+06	High	High	High	1
FALSE	High	Master Protein	P14_v1_340035	ID:109592268 Beta-agarase [Pseudomonas sp. P14]	0	FALSE	72.114	34	19	21	65	19	744	82.1	5.76	187.79	19	0	0.959	0.643	0.704	0.986584	0.567827	0.790762	23.72	25.46	25.82	84.3	81.7	134				2.84755e+06	2.75656e+06	4.52408e+06	High	High	High	1
FALSE	High	Master Protein	P14_v1_180015	ID:109591323 Superfamily II DNA/RNA helicases [Pseudomonas sp. P14]	0	FALSE	72.008	21	18	20	58	18	1105	124.4	6.84	134.92	18	0	0.832	1.128	1.262	0.895216	0.989781	0.94892	27.22	37.1	14.5	101.7	117	81.3				1.47156e+06	1.69174e+06	1.17588e+06	High	High	High	1
FALSE	High	Master Protein	P14_v1_780017	ID:109593728 two-component system, chemotaxis family, sensor kinase Cph1 [Pseudomonas sp. P14]	0	FALSE	71.972	25	15	15	53	15	748	82.9	6.14	137.65	15	0	1.005	1.013	1.267	0.986584	0.989781	0.970122	31.57	46.28	38.68	109.9	95	95.1				2.53238e+06	2.19009e+06	2.19284e+06	High	High	High	1	Met-loss [N-Term]
FALSE	High	Master Protein	P14_v1_130051	ID:109590996 ldhA| D-lactate dehydrogenase [Pseudomonas sp. P14]	0	FALSE	71.922	59	13	15	57	13	329	35.6	6.27	172.68	13	0	1.035	0.605	0.673	0.979569	0.487179	0.741688	21.36	41.72	41.59	74.3	91.7	133.9				2.64696e+06	3.26619e+06	4.76985e+06	High	High	High	1
FALSE	High	Master Protein	P14_v1_10168	ID:109589184 HSP20 family protein [Pseudomonas sp. P14]	0	FALSE	71.912	70	14	18	105	14	186	21.4	6.55	254.4	14	0	1.17	98.35	86.434	0.81123	1.38203e-16	1.15948e-16	18.74	66.83	67.83	157.2	141.8	1				4.33838e+07	3.91545e+07	279921	High	High	Peak Found	1
FALSE	High	Master Protein	P14_v1_10284	ID:109589300 putative ATP-dependent endonuclease of the OLD family [Pseudomonas sp. P14]	0	FALSE	71.795	34	19	20	75	19	633	69.8	6.38	200.43	19	0	0.849	0.914	0.929	0.898103	0.945413	0.944122	28.66	28.77	34.89	103.7	83.5	112.7				3.49617e+06	2.81542e+06	3.7986e+06	High	High	High	1
FALSE	High	Master Protein	P14_v1_700017	ID:109593504 aldehyde dehydrogenase (NAD(+)) [Pseudomonas sp. P14]	0	FALSE	71.753	35	15	16	67	15	496	53.1	5.69	172.96	15	0	1.046	0.726	0.845	0.962994	0.741307	0.912394	36.75	29.65	59.93	87.4	95.6	116.9				3.4773e+06	3.80354e+06	4.65035e+06	High	High	High	1
FALSE	High	Master Protein	P14_v1_20067	ID:109589460 membrane-bound lytic murein transglycosylase B [Pseudomonas sp. P14]	0	FALSE	71.539	53	14	14	59	14	438	48	7.55	189.36	14	0	1.127	1.122	0.983	0.898103	0.987073	0.951177	10.48	24.7	40.23	112.3	89.9	97.8				8.06985e+06	6.46363e+06	7.02655e+06	High	High	High	1
FALSE	High	Master Protein	P14_v1_20027	ID:109589420 Alcohol dehydrogenase, zinc-binding domain protein [Pseudomonas sp. P14]	0	FALSE	71.526	52	12	16	117	12	336	35.6	6.29	335.65	12	0	1.472	1.276	0.859	0.229579	0.999657	0.775827	12.4	33.75	31.91	120.2	83.5	96.3				3.30678e+07	2.29778e+07	2.64889e+07	High	High	High	1
FALSE	High	Master Protein	P14_v1_610032	ID:109593239 wecB| UDP-N-acetylglucosamine 2-epimerase [Pseudomonas sp. P14]	0	FALSE	71.46	58	18	18	50	18	380	41.7	6.61	158.67	18	0	0.936	0.942	0.946	0.984666	0.927459	0.940461	25.99	11.16	27.27	99.3	95.7	105				4.96228e+06	4.78466e+06	5.24979e+06	High	High	High	1
FALSE	High	Master Protein	P14_v1_170053	ID:109591294 trpC| Indole-3-glycerol phosphate synthase [Pseudomonas sp. P14]	0	FALSE	71.386	49	15	16	118	15	277	30.4	5.03	334.83	15	0	1.065	1.241	1.262	0.92833	0.992664	0.976549	19.99	26.23	16.68	108.7	104.5	86.8				1.89836e+07	1.82613e+07	1.51582e+07	High	High	High	1
FALSE	High	Master Protein	P14_v1_190052	ID:109591429 metXS| Homoserine O-succinyltransferase [Pseudomonas sp. P14]	0	FALSE	71.37	42	12	14	59	12	379	41.6	6.1	160.81	12	0	1.106	1.128	1.164	0.92833	0.999657	0.999424	25.14	35.25	35.18	108.1	102.4	89.6				3.09614e+06	2.93392e+06	2.56635e+06	High	High	High	1	Met-loss [N-Term]
FALSE	High	Master Protein	P14_v1_470001	ID:109592745 metC| Cystathionine beta-lyase [Pseudomonas sp. P14]	0	FALSE	71.332	38	12	17	52	12	393	42.5	6.46	171	12	0	1.179	1.369	1.132	0.825082	0.952121	0.997122	11.25	26.08	23.58	119.5	96.9	83.5				4.62804e+06	3.75233e+06	3.23433e+06	High	High	High	1
FALSE	High	Master Protein	P14_v1_220025	ID:109591589 fabD| [acyl-carrier-protein] S-malonyltransferase [Pseudomonas sp. P14]	0	FALSE	71.04	42	9	16	105	9	312	32.6	5.07	366.51	9	0	1.008	1.338	1.359	0.984666	0.982006	0.976549	31.9	40.1	40.46	111.4	105.6	83				8.31926e+06	7.88933e+06	6.1946e+06	High	High	High	1
FALSE	High	Master Protein	P14_v1_460012	ID:109592715 putative exported protein [Pseudomonas sp. P14]	0	FALSE	71.016	21	21	23	55	21	1273	138.5	6.4	123.88	21	0	1.009	1.022	1.132	0.995447	0.999657	0.976549	9.5	22.2	31.36	100.5	120.7	78.8				1.19138e+06	1.43111e+06	934282	High	High	High	1
FALSE	High	Master Protein	P14_v1_750025	ID:109593638 tgnB| Flavin-dependent trigonelline monooxygenase, oxygenase component [Pseudomonas sp. P14]	0	FALSE	70.734	59	15	18	58	15	346	38.9	5.81	130.03	15	0	1.198	0.582	0.48	0.898103	0.455044	0.374814	24.03	29.99	47.72	78	58.2	163.9				1.58346e+06	1.18131e+06	3.32908e+06	High	High	High	1
FALSE	High	Master Protein	P14_v1_730006	ID:109593567 recG| ATP-dependent DNA helicase RecG [Pseudomonas sp. P14]	0	FALSE	70.693	30	17	17	49	17	692	76.4	6.79	132.57	17	0	0.884	0.888	1.076	0.939049	0.964781	0.999424	8.82	49.5	36.79	83.3	121.9	94.8				1.04716e+06	1.53195e+06	1.19104e+06	High	High	High	1
FALSE	High	Master Protein	P14_v1_720010	ID:109593549 yejA| putative oligopeptide ABC transporter periplasmic binding protein YejA [Pseudomonas sp. P14]	0	FALSE	70.417	33	16	16	50	16	611	69.6	7.15	135.8	16	0	0.975	1.246	1.107	0.99493	0.988427	0.993355	24.13	57.38	46.27	103.7	100.2	96.1				3.61025e+06	3.4872e+06	3.34628e+06	High	High	High	1
FALSE	High	Master Protein	P14_v1_1130005	ID:109594426 Membrane fusion protein (MFP) family protein [Pseudomonas sp. P14]	0	FALSE	70.331	35	16	18	64	16	458	51	7.47	141.5	16	0	1.077	1.303	1.283	0.947246	0.989781	0.98892	24.31	43.71	44.13	110.3	109	80.7				6.71819e+06	6.63929e+06	4.91623e+06	High	High	High	1
FALSE	High	Master Protein	P14_v1_470019	ID:109592763 conserved protein of unknown function [Pseudomonas sp. P14]	0	FALSE	70.286	38	12	14	48	12	402	42.9	5.3	160.31	12	0	0.642	7.162	9.379	0.248063	2.02227e-05	0.00025673	24.44	27.62	16.68	111.7	179.5	8.8				5.73617e+06	9.22134e+06	451791	High	High	High	1
FALSE	High	Master Protein	P14_v1_160007	ID:109591177 glcE| glycolate dehydrogenase, putative FAD-binding subunit [Pseudomonas sp. P14]	0	FALSE	70.228	59	15	15	35	15	350	37.8	7.44	92.14	15	0	1.952	0.058	0.044	0.0801766	1.70114e-12	3.14852e-10	47.29	125.89	115.41	4.2	2.8	293				122888	80921.4	8.58524e+06	High	High	High	1	Met-loss [N-Term]
FALSE	High	Master Protein	P14_v1_1180007	ID:109594485 aspA| aspartate ammonia-lyase [Pseudomonas sp. P14]	0	FALSE	70.215	34	14	18	50	14	485	52.4	6.18	143.23	14	0	0.517	4.804	9.16	0.0125446	0.00171876	0.000574042	23.61	45.01	24.06	92.6	187.1	20.3				3.77202e+06	7.627e+06	827085	High	High	High	1
FALSE	High	Master Protein	P14_v1_900020	ID:109594027 yceI| protein YceI [Pseudomonas sp. P14]	0	FALSE	70.171	74	13	16	235	13	192	20.7	7.14	671.9	13	0	1.028	0.731	0.712	0.951844	0.505874	0.567372	20.17	20.46	37.55	93.1	84.9	122				9.19946e+07	8.38881e+07	1.20514e+08	High	High	High	1
FALSE	High	Master Protein	P14_v1_560021	ID:109593076 acrA| multidrug efflux pump membrane fusion lipoprotein AcrA [Pseudomonas sp. P14]	0	FALSE	70.167	48	15	17	81	15	384	41.3	8	226.38	15	0	0.838	2.656	3.203	0.951676	0.273623	0.403838	16.61	20.61	22.43	117.9	141.8	40.3				2.66811e+07	3.20968e+07	9.13411e+06	High	High	High	1
FALSE	High	Master Protein	P14_v1_860005	ID:109593916 cadA| putative cadmium-transporting ATPase [Pseudomonas sp. P14]	0	FALSE	70.128	29	15	17	42	15	752	79.6	6.43	121.51	15	0	1.14	0.613	0.526	0.947614	0.649544	0.415681	16.15	43.03	25.04	70.2	79.4	150.3				794373	898824	1.70092e+06	High	High	High	1
FALSE	High	Master Protein	P14_v1_20221	ID:109589614 rlmJ| Ribosomal RNA large subunit methyltransferase J [Pseudomonas sp. P14]	0	FALSE	70.05	72	17	19	70	17	278	31.8	7.34	193.65	17	0	0.888	1.036	1.154	0.951522	0.982006	0.999483	16.73	18.94	28.48	93	113.6	93.4				4.06932e+06	4.96976e+06	4.08863e+06	High	High	High	1
FALSE	High	Master Protein	P14_v1_200047	ID:109591481 ahpC| alkyl hydroperoxide reductase, AhpC component [Pseudomonas sp. P14]	0	FALSE	70.024	63	12	13	84	10	187	20.5	5.14	289.71	12	0	1.11	0.432	0.395	0.895216	0.0302617	0.0640171	19.01	33.9	13.04	74	69	156.9				1.52307e+07	1.42047e+07	3.22806e+07	High	High	High	1
FALSE	High	Master Protein	P14_v1_20080	ID:109589473 proA| Gamma-glutamyl phosphate reductase [Pseudomonas sp. P14]	0	FALSE	69.99	56	18	18	73	18	423	45.4	6.21	199.89	18	0	1.117	1.008	0.916	0.902019	0.941308	0.914402	25.3	26.64	42.02	121	89.7	89.3				1.04204e+07	7.72283e+06	7.68523e+06	High	High	High	1	Met-loss [N-Term]
FALSE	High	Master Protein	P14_v1_680012	ID:109593449 ftsK| DNA translocase FtsK [Pseudomonas sp. P14]	0	FALSE	69.938	33	20	20	63	20	834	91.2	6.48	154.2	20	0	1.071	1.134	1.009	0.951522	0.996599	0.973197	21.76	26.17	33.2	99.8	99.7	100.5				3.25561e+06	3.2542e+06	3.27811e+06	High	High	High	1
FALSE	High	Master Protein	P14_v1_430031	ID:109592618 bkdB| Lipoamide acyltransferase component of branched-chain alpha-keto acid dehydrogenase complex [Pseudomonas sp. P14]	0	FALSE	69.927	37	11	14	69	11	423	45.2	6.34	204.52	11	0	0.909	1.798	1.897	0.979569	0.817557	0.845909	22.31	9.69	6.32	115	118.8	66.2				7.82118e+06	8.08398e+06	4.50558e+06	High	High	High	1
FALSE	High	Master Protein	P14_v1_90031	ID:109590600 nadB| L-aspartate oxidase [Pseudomonas sp. P14]	0	FALSE	69.856	45	18	18	68	18	534	59.1	5.95	176.29	18	0	1.031	1.022	0.952	0.971734	0.964781	0.952164	24.13	44.27	41.14	101.7	91.4	106.9				4.62381e+06	4.15773e+06	4.86236e+06	High	High	High	1
FALSE	High	Master Protein	P14_v1_1490004	ID:109594715 thiG| 1-deoxy-D-xylulose 5-phosphate:thiol sulfurtransferase [Pseudomonas sp. P14]	0	FALSE	69.79	52	10	15	71	10	270	28.9	6.01	255.84	10	0	1.02	1.036	0.919	0.95737	0.940452	0.87387	18.81	7.83	12.2	99.8	100.9	99.4				1.28337e+07	1.29757e+07	1.27844e+07	High	High	High	1
FALSE	High	Master Protein	P14_v1_90037	ID:109590606 lepB| signal peptidase I [Pseudomonas sp. P14]	0	FALSE	69.709	56	12	18	60	12	284	32	8.84	169.39	12	0	1.086	1.165	1.038	0.939049	0.998921	0.976549	12.94	26.98	33.53	107.5	96.5	96				3.61753e+06	3.24698e+06	3.23044e+06	High	High	High	1
FALSE	High	Master Protein	P14_v1_320042	ID:109592178 ispG| (E)-4-hydroxy-3-methylbut-2-enyl-diphosphate synthase (flavodoxin) [Pseudomonas sp. P14]	0	FALSE	69.644	54	16	16	72	16	369	39.7	6.28	228.73	16	0	0.791	1.276	1.648	0.885631	0.990692	0.933525	19.16	12.56	25.91	96	125.8	78.1				8.85399e+06	1.16015e+07	7.20567e+06	High	High	High	1
FALSE	High	Master Protein	P14_v1_300002	ID:109592028 trhP| tRNA wobble base hydroxylation protein TrhP [Pseudomonas sp. P14]	0	FALSE	69.552	43	17	18	52	17	444	49.7	6.87	144.96	17	0	0.884	100	100	0.951676	1.38203e-16	1.15948e-16	13.65			140.5	159.5					6.7701e+06	7.68098e+06		High	High	n/a	1
FALSE	High	Master Protein	P14_v1_750018	ID:109593631 NitT/TauT family transport system substrate-binding protein [Pseudomonas sp. P14]	0	FALSE	69.543	45	12	14	68	12	401	43.7	7.05	214.5	12	0	0.97	0.957	0.992	0.990501	0.904194	0.938608	17.93	27.11	36.34	94.1	110.6	95.3				9.24901e+06	1.0878e+07	9.37261e+06	High	High	High	1
FALSE	High	Master Protein	P14_v1_1320009	ID:109594616 Xanthine dehydrogenase family protein molybdopterin-binding subunit [Pseudomonas sp. P14]	0	FALSE	69.281	21	14	15	48	14	943	103.6	7.08	129.72	14	0	0.609	1.706	2.74	0.124529	0.763365	0.209647	12.72	11.34	17.51	82.6	164.8	52.7				821486	1.63913e+06	524119	High	High	High	1
FALSE	High	Master Protein	P14_v1_30180	ID:109589812 algB| Alginate biosynthesis transcriptional regulatory protein AlgB [Pseudomonas sp. P14]	0	FALSE	69.081	46	16	17	65	16	448	49.6	5.71	208.68	16	0	0.985	1.397	1.422	0.994001	0.951383	0.950296	11.67	51.44	46.89	110.1	110.2	79.6				4.93525e+06	4.94007e+06	3.5673e+06	High	High	High	1
FALSE	High	Master Protein	P14_v1_240075	ID:109591759 rplC| 50S ribosomal subunit protein L3 [Pseudomonas sp. P14]	0	FALSE	68.889	70	12	16	146	12	211	22.6	9.92	453.88	12	0	0.767	1.52	1.884	0.883182	0.956391	0.922898	24.25	19.92	14.94	97.7	139.7	62.6				1.45758e+08	2.08341e+08	9.33281e+07	High	High	High	1
FALSE	High	Master Protein	P14_v1_1970001	ID:109594802 transketolase 1 (fragment) [Pseudomonas sp. P14]	0	FALSE	68.667	55	14	16	133	5	232	25.4	5.01	404.42	14	9	0.904	1.604	2.173	0.985193	0.932747	0.83558	22.3	50.02	16.8	114.5	124.2	61.3				9.00943e+07	9.77528e+07	4.82694e+07	High	High	High	1
FALSE	High	Master Protein	P14_v1_580009	ID:109593130 etfB| Electron transfer flavoprotein subunit beta [Pseudomonas sp. P14]	0	FALSE	68.581	61	12	16	153	12	249	26.3	9	500.19	12	0	0.897	1.671	1.93	0.984666	0.906926	0.906027	11.87	47.66	37.46	110.9	129.3	59.8				8.63039e+07	1.00611e+08	4.65435e+07	High	High	High	1
FALSE	High	Master Protein	P14_v1_340042	ID:109592275 NAD(FAD)-utilizing dehydrogenase [Pseudomonas sp. P14]	0	FALSE	68.377	33	17	19	70	17	535	58.4	6.86	171.78	17	0	0.821	0.978	1.243	0.874695	0.949634	0.996963	14.63	36.06	45.1	89.5	113.5	97				4.41371e+06	5.59666e+06	4.78006e+06	High	High	High	1
FALSE	High	Master Protein	P14_v1_520038	ID:109592959 Short-chain dehydrogenase/reductase SDR [Pseudomonas sp. P14]	0	FALSE	68.319	56	13	14	60	13	313	33.3	8.95	175.63	13	0	0.883	1.588	2.004	0.962994	0.907146	0.790762	20	35.22	19.29	108.1	121.7	70.2				8.21172e+06	9.24787e+06	5.33355e+06	High	High	High	1
FALSE	High	Master Protein	P14_v1_360021	ID:109592335 Protein slr1894 [Pseudomonas sp. P14]	0	FALSE	68.314	85	12	15	168	12	157	17.9	5.36	475.41	12	0	0.786	1.087	1.232	0.902239	0.956566	0.972265	31.24	49.98	33.69	89.8	125.5	84.6				3.17817e+07	4.44078e+07	2.99272e+07	High	High	High	1	Met-loss [N-Term]
FALSE	High	Master Protein	P14_v1_1230011	ID:109594542 rnd| Ribonuclease D [Pseudomonas sp. P14]	0	FALSE	68.298	45	16	18	45	16	377	42.6	5.78	132.5	16	0	1.039	1.199	0.946	0.963684	0.990397	0.951177	26.18	32.07	36.54	108.4	106.6	85				4.24523e+06	4.1772e+06	3.33039e+06	High	High	High	1
FALSE	High	Master Protein	P14_v1_730005	ID:109593566 oxyR| Hydrogen peroxide-inducible genes activator [Pseudomonas sp. P14]	0	FALSE	68.198	54	13	15	48	13	308	33.7	6.99	129.4	13	0	0.856	1.504	1.755	0.92833	0.948129	0.896324	13.67	19.98	24.34	105.4	121	73.6				6.40722e+06	7.35901e+06	4.47769e+06	High	High	High	1
FALSE	High	Master Protein	P14_v1_1770001	ID:109594781 frmB| S-formylglutathione hydrolase FrmB [Pseudomonas sp. P14]	0	FALSE	68.142	59	11	12	156	4	277	30.8	6.14	437.99	11	0	0.73	0.01	0.01	0.735222	1.38203e-16	1.15948e-16	0	65.51	0	2	1.1	296.9				95450	53886.7	1.4451e+07	High	High	High	1
FALSE	High	Master Protein	P14_v1_120060	ID:109590922 ThiJ/PfpI family protein [Pseudomonas sp. P14]	0	FALSE	68.142	71	13	17	83	13	228	25.2	6.55	239.44	13	0	1.42	0.706	0.563	0.301996	0.45559	0.297642	7	26.73	38.21	99.5	74.7	125.7				2.56474e+07	1.92589e+07	3.24026e+07	High	High	High	1
FALSE	High	Master Protein	P14_v1_190038	ID:109591415 mrcA| Penicillin-insensitive transglycosylase / Penicillin-sensitive transpeptidase [Pseudomonas sp. P14]	0	FALSE	67.973	26	18	18	56	18	817	89.1	6.86	144.72	18	0	0.912	0.919	0.882	0.961812	0.941308	0.93347	17.1	24.32	24.75	86.6	97.8	115.6				2.6725e+06	3.01895e+06	3.56941e+06	High	High	High	1
FALSE	High	Master Protein	P14_v1_710006	ID:109593517 frr| ribosome-recycling factor [Pseudomonas sp. P14]	0	FALSE	67.925	70	17	20	247	17	185	20.1	8.28	579.7	17	0	0.843	1.183	1.34	0.954962	0.987039	0.98892	13.33	21.66	25.96	97.7	115.3	87				8.13232e+07	9.5981e+07	7.23703e+07	High	High	High	1
FALSE	High	Master Protein	P14_v1_370001	ID:109592356 cysD| sulfate adenylyltransferase subunit 2 [Pseudomonas sp. P14]	0	FALSE	67.778	54	11	14	111	11	305	35.3	6.76	321.06	11	0	0.632	1.845	2.649	0.392968	0.785223	0.63576	19.19	29.16	30.78	97.6	151.7	50.7				1.52824e+07	2.37531e+07	7.92948e+06	High	High	High	1
FALSE	High	Master Protein	P14_v1_860016	ID:109593927 ilvA| threonine deaminase [Pseudomonas sp. P14]	0	FALSE	67.752	42	15	15	56	14	504	54.9	6.54	166.77	15	1	0.879	1.913	2.093	0.939049	0.594789	0.708481	10.65	34.36	36.54	104.7	137.7	57.5				3.16139e+06	4.15653e+06	1.73683e+06	High	High	High	1
FALSE	High	Master Protein	P14_v1_710007	ID:109593518 pyrH| UMP kinase [Pseudomonas sp. P14]	0	FALSE	67.67	55	11	14	113	11	247	26.5	6.3	346.7	11	0	0.861	1.446	1.626	0.965998	0.964781	0.951177	23.16	47.42	19.34	111.1	120.6	68.3				1.41037e+07	1.53129e+07	8.67913e+06	High	High	High	1
FALSE	High	Master Protein	P14_v1_420029	ID:109592579 trmA| tRNA m(5)U54 methyltransferase [Pseudomonas sp. P14]	0	FALSE	67.607	50	12	13	52	12	361	40.9	5.92	168.86	12	0	0.919	0.931	1.127	0.966049	0.964781	0.999424	23.29	14.14	39.75	95.9	103	101.1				2.42323e+06	2.60274e+06	2.55296e+06	High	High	High	1
FALSE	High	Master Protein	P14_v1_680007	ID:109593444 cysG| siroheme synthase [Pseudomonas sp. P14]	0	FALSE	67.578	41	17	17	45	17	463	49.5	6.8	127.05	17	0	0.832	1.222	1.263	0.895216	0.989781	0.982568	24.89	24.87	41.13	101.9	110.6	87.5				3.99154e+06	4.32974e+06	3.42605e+06	High	High	High	1
FALSE	High	Master Protein	P14_v1_1070015	ID:109594357 two-component system, chemotaxis family, chemotaxis protein CheV [Pseudomonas sp. P14]	0	FALSE	67.577	59	19	20	97	19	311	34.5	6.58	254.41	19	0	1.139	0.855	0.783	0.895216	0.824481	0.828024	10.27	20.65	26.18	96.1	86.3	117.5				6.94541e+06	6.23526e+06	8.49095e+06	High	High	High	1	Met-loss [N-Term]
FALSE	High	Master Protein	P14_v1_1070009	ID:109594351 moeA| Molybdopterin molybdenumtransferase [Pseudomonas sp. P14]	0	FALSE	67.553	37	11	13	55	11	408	44	5.53	175	11	0	0.929	0.779	0.835	0.976239	0.839293	0.912542	5.5	22.81	32.18	86.1	95.7	118.2				2.2433e+06	2.49521e+06	3.08089e+06	High	High	High	1
FALSE	High	Master Protein	P14_v1_650007	ID:109593350 pta| phosphate acetyltransferase [Pseudomonas sp. P14]	0	FALSE	67.545	34	16	16	56	16	695	74.6	5.55	162.82	16	0	0.994	0.709	0.762	0.990517	0.681433	0.861563	16.59	33.04	41.33	93.9	91.6	114.5				2.59708e+06	2.53188e+06	3.16405e+06	High	High	High	1
FALSE	High	Master Protein	P14_v1_450006	ID:109592672 glutamine synthetase [Pseudomonas sp. P14]	0	FALSE	67.475	32	14	16	96	11	452	50.8	5.19	277.37	14	3	1.034	1.186	1.304	0.961812	0.996485	0.986275	10.24	38.21	41.73	111.6	114	74.5				8.61118e+06	8.79572e+06	5.74955e+06	High	High	High	1	Met-loss [N-Term]
FALSE	High	Master Protein	P14_v1_110090	ID:109590857 ispB| all-trans-octaprenyl-diphosphate synthase [Pseudomonas sp. P14]	0	FALSE	67.437	54	15	16	63	15	322	35.2	5.21	177.21	15	0	1.05	1.65	1.615	0.951676	0.880539	0.93347	9.26	29.94	26.89	119.5	117.1	63.3				1.06168e+07	1.04048e+07	5.62494e+06	High	High	High	1
FALSE	High	Master Protein	P14_v1_540017	ID:109593012 6-phosphogluconate dehydrogenase, NAD(+)-dependent, decarboxylating [Pseudomonas sp. P14]	0	FALSE	67.409	48	13	17	76	13	327	35.4	6.47	222.61	13	0	1.246	1.341	1.038	0.646961	0.989781	0.944243	13.16	30.94	47.03	114.1	98.1	87.8				1.35981e+07	1.16992e+07	1.04631e+07	High	High	High	1
FALSE	High	Master Protein	P14_v1_600001	ID:109593180 ccoG| Cytochrome c oxidase accessory protein CcoG [Pseudomonas sp. P14]	0	FALSE	67.362	34	15	15	85	15	472	53.4	8.46	245.06	15	0	1.214	2.259	2.202	0.721369	0.492311	0.709609	11.03	33.06	29.9	137	114	49.1				1.4465e+07	1.20369e+07	5.18135e+06	High	High	High	1
FALSE	High	Master Protein	P14_v1_30110	ID:109589742 fmt| 10-formyltetrahydrofolate:L-methionyl-tRNA(fMet) N-formyltransferase [Pseudomonas sp. P14]	0	FALSE	67.336	55	12	13	72	12	310	32.8	5.87	230.45	12	0	0.927	1.588	1.702	0.981628	0.877215	0.881188	5.75	21.55	18.2	108.9	120.9	70.2				5.13266e+06	5.69928e+06	3.30886e+06	High	High	High	1
FALSE	High	Master Protein	P14_v1_490010	ID:109592823 yicC| UPF0701 family protein YicC [Pseudomonas sp. P14]	0	FALSE	67.259	49	16	17	85	16	287	31.9	5.6	205.61	16	0	1.029	0.852	0.812	0.976239	0.855956	0.866501	32.87	24.02	38.56	103.1	102.4	94.5				6.30309e+06	6.26361e+06	5.77572e+06	High	High	High	1
FALSE	High	Master Protein	P14_v1_340044	ID:109592277 insG| KpLE2 phage-like element; IS4 putative transposase [Pseudomonas sp. P14]	0	FALSE	67.167	41	12	16	55	12	436	49.3	9.28	141.44	12	0	0.882	0.81	0.848	0.938769	0.906926	0.926846	13.78	36.21	30.39	81.5	116.4	102.1				1.20203e+06	1.71824e+06	1.50645e+06	High	High	High	1
FALSE	High	Master Protein	P14_v1_450009	ID:109592675 argA| N-acetylglutamate synthase [Pseudomonas sp. P14]	0	FALSE	66.977	47	14	15	51	14	432	47.4	6.01	157.38	14	0	0.881	0.956	1.037	0.947614	0.948129	0.971401	9.3	31.17	44.6	96.5	109.2	94.2				5.01129e+06	5.66905e+06	4.89131e+06	High	High	High	1
FALSE	High	Master Protein	P14_v1_1100008	ID:109594388 thlA| Acetyl-CoA acetyltransferase [Pseudomonas sp. P14]	0	FALSE	66.864	44	12	16	80	12	397	41.4	6.84	224.28	12	0	1.212	0.779	0.671	0.76297	0.749871	0.698733	27.33	31.98	28.3	95.3	83.7	121				5.36761e+06	4.7111e+06	6.8134e+06	High	High	High	1	Met-loss [N-Term]
FALSE	High	Master Protein	P14_v1_460031	ID:109592734 kdsD| D-arabinose 5-phosphate isomerase KdsD [Pseudomonas sp. P14]	0	FALSE	66.688	58	15	15	79	15	324	34.4	6.09	231.65	15	0	0.897	1.065	1.34	0.958614	0.976332	0.98109	23.11	37.9	64.08	97	110.6	92.3				5.81301e+06	6.62687e+06	5.5319e+06	High	High	High	1	Met-loss [N-Term]
FALSE	High	Master Protein	P14_v1_100079	ID:109590753 fdhA| Glutathione-independent formaldehyde dehydrogenase [Pseudomonas sp. P14]	0	FALSE	66.64	57	16	16	55	16	399	42.3	6.52	144.43	16	0	0.678	0.332	0.549	0.307375	0.00625924	0.430735	21.74	35.08	22.69	56.1	81	162.9				3.33578e+06	4.81936e+06	9.69132e+06	High	High	High	1
FALSE	High	Master Protein	P14_v1_540016	ID:109593011 zwf| Glucose-6-phosphate 1-dehydrogenase [Pseudomonas sp. P14]	0	FALSE	66.447	35	14	16	68	13	501	56.2	7.5	207.4	14	1	1.204	0.916	0.799	0.770541	0.941818	0.896324	18.5	27.97	68.01	108	92.9	99.1				3.79285e+06	3.26361e+06	3.48226e+06	High	High	High	1
FALSE	High	Master Protein	P14_v1_340011	ID:109592244 mrp| P-loop NTPase family protein Mrp [Pseudomonas sp. P14]	0	FALSE	66.417	43	10	13	54	10	364	38.2	5.16	174.49	10	0	0.816	2.528	2.722	0.881814	0.283058	0.400357	17.48	29.94	31.86	119.9	135	45				6.79512e+06	7.65015e+06	2.55066e+06	High	High	High	1
FALSE	High	Master Protein	P14_v1_180061	ID:109591369 formate dehydrogenase major subunit [Pseudomonas sp. P14]	0	FALSE	66.404	20	16	22	57	13	960	104.8	6.51	140.59	16	0	0.795	0.762	1.077	0.823653	0.890799	0.989032	9.24	38.02	60.03	76	113.3	110.7				659121	982542	959576	High	High	High	1
FALSE	High	Master Protein	P14_v1_230015	ID:109591644 ybcF| putative carbamate kinase [Pseudomonas sp. P14]	0	FALSE	66.394	40	12	16	188	12	309	33.3	5.48	599.16	12	0	0.766	1.265	1.663	0.880241	0.996599	0.962298	21.83	35.11	36.05	101.5	121.9	76.6				8.56719e+07	1.02853e+08	6.46232e+07	High	High	High	1
FALSE	High	Master Protein	P14_v1_550017	ID:109593039 carboxymethylenebutenolidase [Pseudomonas sp. P14]	0	FALSE	66.22	47	9	12	231	9	241	26.2	7.02	522.91	9	0	1.014	0.975	0.928	0.959555	0.896971	0.887975	19.74	18.53	16.22	100.9	93.9	105.2				1.25867e+07	1.17226e+07	1.3131e+07	High	High	High	1
FALSE	High	Master Protein	P14_v1_1340004	ID:109594628 yajO| 1-deoxyxylulose-5-phosphate synthase YajO [Pseudomonas sp. P14]	0	FALSE	66.206	58	16	17	50	16	331	36.8	6.29	137.85	16	0	0.646	1.657	2.115	0.176689	0.749871	0.697486	27.15	23.1	45.74	92.9	156.3	50.7				2.63012e+06	4.4246e+06	1.43618e+06	High	High	High	1
FALSE	High	Master Protein	P14_v1_1140004	ID:109594438 heme iron utilization protein [Pseudomonas sp. P14]	0	FALSE	66.137	64	12	14	80	12	243	27	6.62	252.59	12	0	0.98	0.873	1.065	0.989511	0.855956	0.971158	17	57.75	44.75	105.6	107.7	86.7				8.10582e+06	8.2733e+06	6.658e+06	High	High	High	1
FALSE	High	Master Protein	P14_v1_220064	ID:109591628 alaA| glutamate--pyruvate aminotransferase AlaA [Pseudomonas sp. P14]	0	FALSE	66.076	43	14	15	52	14	403	44.7	5.96	153.97	14	0	0.785	1.27	1.766	0.868379	0.990692	0.896324	17.72	14.3	33.52	97.1	127.3	75.6				8.16432e+06	1.06969e+07	6.35276e+06	High	High	High	1
FALSE	High	Master Protein	P14_v1_710025	ID:109593536 plsB| Glycerol-3-phosphate acyltransferase [Pseudomonas sp. P14]	0	FALSE	66.005	26	16	20	43	16	828	93.6	9.52	119.11	16	0	0.977	0.98	1.077	0.986584	0.989781	0.999424	21.46	23.91	43.68	76.7	96.4	126.9				990353	1.24472e+06	1.63851e+06	High	High	High	1
FALSE	High	Master Protein	P14_v1_220010	ID:109591574 uvrB| excision nuclease subunit B [Pseudomonas sp. P14]	0	FALSE	65.961	33	17	17	61	17	671	76	5.29	172.94	17	0	0.819	0.964	1.147	0.878629	0.964781	0.999424	12.72	20.52	19.54	90.1	112.6	97.3				3.72114e+06	4.65017e+06	4.01873e+06	High	High	High	1	Met-loss [N-Term]
FALSE	High	Master Protein	P14_v1_50076	ID:109590103 Amino acid ABC transporter substrate-binding protein [Pseudomonas sp. P14]	0	FALSE	65.896	57	14	15	93	14	291	32.7	5.63	257.97	14	0	3.351	0.115	0.021	1.53681e-07	2.43725e-09	1.15948e-16	109.93	43	145.41	33.3	5.4	261.3				3.33851e+06	536406	2.61654e+07	High	Peak Found	High	1
FALSE	High	Master Protein	P14_v1_250007	ID:109591768 enoyl-CoA hydratase [Pseudomonas sp. P14]	0	FALSE	65.649	55	13	15	45	13	357	39.4	5.35	130.79	13	0	1.075	0.676	0.526	0.951522	0.569238	0.473969	20.41	44.96	52.76	83	76.6	140.4				3.08762e+06	2.85137e+06	5.22357e+06	High	High	High	1	Met-loss [N-Term]
FALSE	High	Master Protein	P14_v1_420003	ID:109592553 recB| exodeoxyribonuclease V subunit RecB [Pseudomonas sp. P14]	0	FALSE	65.638	18	16	18	51	16	1224	137.3	6.04	126.28	16	0	1.135	1.039	0.981	0.939049	0.999657	0.989417	29.27	39.84	31.53	102.1	96.7	101.2				1.20927e+06	1.14597e+06	1.19819e+06	High	High	High	1
FALSE	High	Master Protein	P14_v1_440017	ID:109592645 dksA| RNA polymerase-binding transcription factor DksA [Pseudomonas sp. P14]	0	FALSE	65.533	54	11	16	136	11	148	17.1	5.74	397.45	11	0	0.902	1.64	2.006	0.985193	0.916431	0.896324	43.89	39.23	55.52	111.8	127.1	61.1				3.11986e+07	3.54689e+07	1.70538e+07	High	High	High	1
FALSE	High	Master Protein	P14_v1_690019	ID:109593484 tpx| lipid hydroperoxide peroxidase [Pseudomonas sp. P14]	0	FALSE	65.479	87	9	18	100	9	166	17.4	5.12	372.16	9	0	1.451	2.935	2.048	0.25609	0.167194	0.882953	9.51	68.69	77.84	151.9	103.6	44.5				4.20031e+07	2.86443e+07	1.22909e+07	High	High	High	1
FALSE	High	Master Protein	P14_v1_450003	ID:109592669 potF| putrescine ABC transporter periplasmic binding protein [Pseudomonas sp. P14]	0	FALSE	65.467	45	9	14	63	9	364	39.8	7.8	191.24	9	0	1.046	0.617	0.62	0.959968	0.306387	0.592446	30.22	16.09	21.53	87.8	84.7	127.5				7.48263e+06	7.22155e+06	1.08697e+07	High	High	High	1
FALSE	High	Master Protein	P14_v1_350015	ID:109592292 Ribulose-5-phosphate 4-epimerase and related epimerases and aldolases [Pseudomonas sp. P14]	0	FALSE	65.405	52	10	12	38	10	260	28.4	6.58	130.87	10	0	4.911	100	100	1.64131e-16	1.38203e-16	1.15948e-16	2.4			254.9	45.1					7.41434e+06	1.31193e+06		High	High	n/a	1
FALSE	High	Master Protein	P14_v1_300047	ID:109592073 accD| acetyl-CoA carboxyltransferase subunit beta [Pseudomonas sp. P14]	0	FALSE	65.339	47	14	14	114	14	297	32.5	7.71	322.86	14	0	0.933	1.491	1.636	0.99493	0.964781	0.970122	9.47	19.22	16.35	111.5	118	70.5				3.79264e+07	4.0167e+07	2.39874e+07	High	High	High	1
FALSE	High	Master Protein	P14_v1_50147	ID:109590174 Tetratricopeptide repeat protein [Pseudomonas sp. P14]	0	FALSE	65.315	22	14	17	50	14	784	86.2	7.23	151.81	14	0	1.587	0.868	0.578	0.204428	0.941308	0.580553	25.77	29.38	38.4	108.1	71.2	120.7				2.21248e+06	1.45772e+06	2.4703e+06	High	High	High	1
FALSE	High	Master Protein	P14_v1_20146	ID:109589539 Azurin [Pseudomonas sp. P14]	0	FALSE	65.3	50	6	18	300	6	150	16.1	6.92	836.17	6	0	0.85	4.392	4.728	0.958614	0.00964711	0.0875656	18.21	30.88	41.79	124.8	147.5	27.7				1.53586e+08	1.81543e+08	3.41511e+07	High	High	High	1
FALSE	High	Master Protein	P14_v1_80005	ID:109590468 beta-hydroxylase [Pseudomonas sp. P14]	0	FALSE	65.245	52	16	18	89	16	311	35.8	9.69	187.46	16	0	1.133	3.964	3.448	0.895216	0.0243742	0.172577	18.37	32.06	42.57	154.4	114.8	30.8				1.09313e+07	8.1307e+06	2.18093e+06	High	High	High	1
FALSE	High	Master Protein	P14_v1_150042	ID:109591152 quiC| 3-dehydroshikimate dehydratase [Pseudomonas sp. P14]	0	FALSE	65.069	28	13	16	62	13	635	70.4	5.39	192.61	13	0	0.889	1.08	1.386	0.950677	0.990397	0.962298	13.98	20.9	20.7	97.7	104.4	97.9				3.59745e+06	3.84179e+06	3.6048e+06	High	High	High	1
FALSE	High	Master Protein	P14_v1_170008	ID:109591249 pqqE| PqqA peptide cyclase [Pseudomonas sp. P14]	0	FALSE	64.967	44	12	13	39	12	386	43.4	6.39	122.91	12	0	3.982	0.265	0.065	8.06183e-09	0.00377067	7.25619e-08	18.42	40.98	50.29	61.8	12.2	226				2.27382e+06	446793	8.3103e+06	High	High	High	1
FALSE	High	Master Protein	P14_v1_280011	ID:109591928 gshA| Glutamate--cysteine ligase [Pseudomonas sp. P14]	0	FALSE	64.877	31	11	16	65	11	525	59.1	5.05	158.33	11	0	0.862	1.192	1.3	0.92833	0.999657	0.986222	18.47	27.96	34.73	99.9	115.2	84.9				5.34884e+06	6.16498e+06	4.54758e+06	High	High	High	1
FALSE	High	Master Protein	P14_v1_250006	ID:109591767 mmgC| Acyl-CoA dehydrogenase [Pseudomonas sp. P14]	0	FALSE	64.873	38	13	15	69	13	383	41.5	5.9	215.4	13	0	1.264	0.827	0.775	0.61912	0.810765	0.83558	19.27	36.78	38.46	107.3	92.2	100.5				6.48161e+06	5.57216e+06	6.07034e+06	High	High	High	1
FALSE	High	Master Protein	P14_v1_210062	ID:109591563 L,D-transpeptidase ErfK/SrfK [Pseudomonas sp. P14]	0	FALSE	64.79	48	14	15	88	14	325	35	5.67	234.42	14	0	0.918	1.294	1.524	0.994001	0.992686	0.962298	11.95	9.76	17.95	104.4	114.4	81.2				1.20133e+07	1.31689e+07	9.34602e+06	High	High	High	1
FALSE	High	Master Protein	P14_v1_130064	ID:109591009 DUF3108 domain-containing protein [Pseudomonas sp. P14]	0	FALSE	64.751	57	15	17	106	15	236	26.3	8.65	334.6	15	0	0.992	1.165	1.175	0.978915	0.980679	0.959397	30.01	28.16	57.23	102.3	109.1	88.7				1.71192e+07	1.82546e+07	1.4845e+07	High	High	High	1
FALSE	High	Master Protein	P14_v1_360002	ID:109592316 DUF1456 domain-containing protein [Pseudomonas sp. P14]	0	FALSE	64.605	69	10	14	68	10	153	17.6	9.23	192.41	10	0	0.731	1.26	1.806	0.567432	0.981142	0.854364	19.45	63.7	55.67	106.3	142.1	51.7				5.62803e+06	7.52558e+06	2.73637e+06	High	High	High	1
FALSE	High	Master Protein	P14_v1_1090006	ID:109594380 D-alanine--poly(phosphoribitol) ligase subunit 1 [Pseudomonas sp. P14]	0	FALSE	64.59	8	18	19	26	16	3031	333	5.57	61.11	18	0	2.372	0.307	0.162	0.0236233	0.0620678	0.00329859	0	31.08	0	42.8	2.3	254.9				119075	6421.21	709213	High	High	High	1
FALSE	High	Master Protein	P14_v1_1210002	ID:109594514 Phytanoyl-CoA dioxygenase [Pseudomonas sp. P14]	0	FALSE	64.572	44	13	15	59	13	347	38.9	9.74	188.55	13	0	0.566	21.452	31.23	0.0511719	4.90775e-12	1.49022e-09	12.9	18.1	41.73	110.3	181.5	8.2				5.14051e+06	8.46011e+06	384327	High	High	Peak Found	1
FALSE	High	Master Protein	P14_v1_140073	ID:109591110 dxs| 1-deoxy-D-xylulose-5-phosphate synthase [Pseudomonas sp. P14]	0	FALSE	64.512	28	15	16	87	15	631	68.1	6	210.41	15	0	0.97	1.304	1.24	0.989362	0.990397	0.999424	13.98	16.76	22.48	107	111.2	81.7				9.87565e+06	1.02641e+07	7.54194e+06	High	High	High	1	Met-loss [N-Term]
FALSE	High	Master Protein	P14_v1_200066	ID:109591500 TPR repeat-containing protein PA4667 [Pseudomonas sp. P14]	0	FALSE	64.204	36	17	19	46	17	573	63.9	5	122.22	17	0	1.203	1.035	0.863	0.793868	0.989781	0.93347	24.08	32.49	8.43	119.3	85.2	95.5				2.86101e+06	2.04268e+06	2.29136e+06	High	High	High	1
FALSE	High	Master Protein	P14_v1_340023	ID:109592256 Alanyl-tRNA editing protein [Pseudomonas sp. P14]	0	FALSE	64.176	64	11	14	86	11	262	29.4	6.05	274.61	11	0	0.917	0.915	0.866	0.984666	0.867967	0.890984	30.96	33.82	45.12	98.7	98.5	102.9				1.00278e+07	1.00113e+07	1.04547e+07	High	High	High	1	Met-loss [N-Term]
FALSE	High	Master Protein	P14_v1_370030	ID:109592385 rsmH| 16S rRNA m(4)C1402 methyltransferase [Pseudomonas sp. P14]	0	FALSE	64.16	48	12	14	73	12	315	34.2	7.14	205.59	12	0	0.958	1.959	2.041	0.994001	0.688835	0.775827	14.53	14.91	20.62	131.8	109.4	58.9				1.08196e+07	8.9815e+06	4.83393e+06	High	High	High	1
FALSE	High	Master Protein	P14_v1_20150	ID:109589543 rplI| 50S ribosomal subunit protein L9 [Pseudomonas sp. P14]	0	FALSE	64.15	76	9	14	731	9	148	15.5	5.58	2377	9	0	0.797	1.226	1.487	0.917175	0.990397	0.988477	13.73	18.51	26.02	103.7	124	72.2				1.1352e+08	1.35703e+08	7.90291e+07	High	High	High	1
FALSE	High	Master Protein	P14_v1_120082	ID:109590944 acrB| multidrug efflux pump RND permease AcrB [Pseudomonas sp. P14]	0	FALSE	64.037	21	18	18	39	18	1042	111.6	5.3	109.42	18	0	3.127	8.913	3.007	3.94779e-08	9.56303e-07	0.111466	6.12	42.64	40.85	218.6	65.2	16.1				6.03829e+06	1.80213e+06	445334	High	High	High	1
FALSE	High	Master Protein	P14_v1_220022	ID:109591586 fabF| 3-oxoacyl-[acyl carrier protein] synthase 2 [Pseudomonas sp. P14]	0	FALSE	63.746	33	10	13	54	10	414	43.1	5.8	202.97	10	0	1.029	0.776	0.885	0.973118	0.669867	0.896324	21.9	17.22	6.7	89.4	98.6	112.1				7.51647e+06	8.28783e+06	9.42227e+06	High	High	High	1
FALSE	High	Master Protein	P14_v1_190050	ID:109591427 proC| Pyrroline-5-carboxylate reductase [Pseudomonas sp. P14]	0	FALSE	63.695	57	12	14	91	12	272	28.3	5.05	287.08	12	0	1.126	1.795	1.693	0.883182	0.833052	0.94892	9.37	19.35	10.79	123	111.8	65.2				1.87895e+07	1.70718e+07	9.96503e+06	High	High	High	1
FALSE	High	Master Protein	P14_v1_420017	ID:109592567 NAD-dependent L-serine dehydrogenase [Pseudomonas sp. P14]	0	FALSE	63.587	56	10	12	63	10	295	30.3	6.21	216.61	10	0	0.954	2.181	2.256	0.990588	0.546797	0.663805	17.64	24.33	23.88	116.9	123.2	59.8				7.08342e+06	7.46311e+06	3.62411e+06	High	High	High	1
FALSE	High	Master Protein	P14_v1_700024	ID:109593511 xpt| Xanthine phosphoribosyltransferase [Pseudomonas sp. P14]	0	FALSE	63.565	86	13	14	57	13	190	20.3	6.19	153.94	13	0	0.856	1.319	1.647	0.924659	0.976559	0.906027	26.19	33.1	42.82	102.2	122.7	75.1				5.2587e+06	6.31139e+06	3.86496e+06	High	High	High	1
FALSE	High	Master Protein	P14_v1_370038	ID:109592393 murG| N-acetylglucosaminyl transferase [Pseudomonas sp. P14]	0	FALSE	63.448	59	14	15	69	14	359	38.1	9.41	179.67	14	0	0.907	1.368	1.446	0.973118	0.97682	0.962298	12.96	21.77	24.9	108.9	115.6	75.5				7.23921e+06	7.68702e+06	5.01815e+06	High	High	High	1
FALSE	High	Master Protein	P14_v1_740015	ID:109593604 Nucleoid-associated protein PP_0973 [Pseudomonas sp. P14]	0	FALSE	63.319	47	14	16	78	14	335	37.6	5.76	199.23	14	0	0.984	1.068	1.172	0.990517	0.989781	0.999424	15.76	44.88	73.5	98.8	102.1	99.1				4.06285e+06	4.19766e+06	4.07651e+06	High	High	High	1
FALSE	High	Master Protein	P14_v1_630016	ID:109593297 fklB| FKBP-type 22 kDa peptidyl-prolyl cis-trans isomerase [Pseudomonas sp. P14]	0	FALSE	63.265	65	13	14	120	13	250	26.5	5.03	374.49	13	0	1.089	1.724	1.485	0.908539	0.885003	0.988721	17.27	29.13	34.7	128.9	104.9	66.2				4.66798e+07	3.79993e+07	2.39799e+07	High	High	High	1
FALSE	High	Master Protein	P14_v1_20153	ID:109589546 rpsF| 30S ribosomal subunit protein S6 [Pseudomonas sp. P14]	0	FALSE	63.24	69	11	16	143	11	141	16.4	5.02	388.22	11	0	1.192	1.526	1.465	0.767819	0.955806	0.994871	36.91	26.87	25.6	127.1	100.9	72				4.86197e+07	3.85863e+07	2.75208e+07	High	High	High	1
FALSE	High	Master Protein	P14_v1_260052	ID:109591866 pyrC| dihydroorotase [Pseudomonas sp. P14]	0	FALSE	63.234	59	14	14	73	14	357	39.3	6.71	210.97	14	0	0.789	1.337	1.773	0.904505	0.990397	0.941597	15.01	27.98	23.09	97.3	129.1	73.6				1.51791e+07	2.01494e+07	1.14877e+07	High	High	High	1
FALSE	High	Master Protein	P14_v1_80037	ID:109590500 Transcriptional regulator, LysR family [Pseudomonas sp. P14]	0	FALSE	63.213	51	12	13	50	12	307	33.9	7.12	138.82	12	0	0.899	1.027	1.14	0.952667	0.989781	0.999424	14.73	34.62	29.06	101.1	109.3	89.6				2.44793e+06	2.64602e+06	2.17063e+06	High	High	High	1
FALSE	High	Master Protein	P14_v1_20149	ID:109589542 dnaB| replicative DNA helicase [Pseudomonas sp. P14]	0	FALSE	63.094	43	17	20	51	17	465	51.5	5.07	135.01	17	0	1.147	0.719	0.596	0.899689	0.716846	0.649878	16.64	14.51	29.17	100.9	71.9	127.2				2.44678e+06	1.7452e+06	3.08528e+06	High	High	High	1
FALSE	High	Master Protein	P14_v1_370040	ID:109592395 ddlB| D-alanine--D-alanine ligase B [Pseudomonas sp. P14]	0	FALSE	63.061	48	13	13	77	13	318	34.1	5.06	223.86	13	0	0.979	1.852	1.866	0.984463	0.787947	0.890984	24.99	30.62	31.62	118.1	121.2	60.7				1.34644e+07	1.38167e+07	6.91789e+06	High	High	High	1
FALSE	High	Master Protein	P14_v1_440013	ID:109592641 zraR| Transcriptional regulatory protein ZraR [Pseudomonas sp. P14]	0	FALSE	63.007	39	15	19	63	15	480	52.6	5.59	160.98	15	0	0.877	0.936	1.092	0.947614	0.916431	0.977897	9.85	16.44	18.49	95.3	104.2	100.6				5.82364e+06	6.36871e+06	6.14821e+06	High	High	High	1
FALSE	High	Master Protein	P14_v1_540003	ID:109592998 nudC| NAD-capped RNA hydrolase NudC [Pseudomonas sp. P14]	0	FALSE	62.935	62	13	13	51	13	276	30.8	5.36	160.49	13	0	0.955	0.881	0.911	0.984666	0.907703	0.93939	26.08	39.79	30.78	93.9	102.7	103.5				3.18931e+06	3.48803e+06	3.5147e+06	High	High	High	1
FALSE	High	Master Protein	P14_v1_730027	ID:109593588 putative glucose-6-phosphate 1-epimerase [Pseudomonas sp. P14]	0	FALSE	62.899	56	10	11	43	10	298	33.3	5.01	160.41	10	0	0.909	1.209	1.167	0.958614	0.989781	0.999424	18.8	33.19	30.52	101.6	113.8	84.6				3.05482e+06	3.42456e+06	2.54488e+06	High	High	High	1	Met-loss [N-Term]
FALSE	High	Master Protein	P14_v1_110003	ID:109590770 paraquat-inducible protein B [Pseudomonas sp. P14]	0	FALSE	62.786	25	15	15	47	15	769	83.5	9.11	147.17	15	0	1.203	0.718	0.652	0.825999	0.705031	0.74709	17.81	6.13	29.76	94.7	77.1	128.2				2.35008e+06	1.91241e+06	3.18025e+06	High	High	High	1
FALSE	High	Master Protein	P14_v1_760016	ID:109593658 XRE family transcriptional regulator [Pseudomonas sp. P14]	0	FALSE	62.722	50	13	14	77	13	276	30.5	6.61	190	13	0	0.817	1.334	1.506	0.937737	0.989781	0.975856	12.72	47.82	33.36	84.5	144.8	70.8				9.47915e+06	1.62487e+07	7.94304e+06	High	High	High	1
FALSE	High	Master Protein	P14_v1_90008	ID:109590577 SAM-dependent methyltransferase [Pseudomonas sp. P14]	0	FALSE	62.659	44	13	13	47	13	404	44.6	7.69	126.25	13	0	0.786	1.246	1.362	0.767819	0.964781	0.922898	30.99	47.71	26.39	106.6	136	57.5				1.72335e+06	2.19927e+06	929134	High	High	High	1	Met-loss [N-Term]
FALSE	High	Master Protein	P14_v1_190031	ID:109591408 DamX protein [Pseudomonas sp. P14]	0	FALSE	62.625	33	12	15	64	12	529	55.3	6.83	199.35	12	0	0.885	1.363	1.625	0.970595	0.976559	0.93347	21.06	47.86	59.19	100.9	118.7	80.4				8.95631e+06	1.05298e+07	7.13659e+06	High	High	High	1	Met-loss [N-Term]; Met-loss+Acetyl [N-Term]
FALSE	High	Master Protein	P14_v1_40185	ID:109590027 protein of unknown function [Pseudomonas sp. P14]	0	FALSE	62.6	37	17	17	45	17	542	58.5	5.96	125.92	17	0	0.941	0.411	0.428	0.982511	0.0789675	0.262934	8.61	24.84	39.85	67.3	57.9	174.8				1.92311e+06	1.65495e+06	4.99624e+06	High	High	High	1
FALSE	High	Master Protein	P14_v1_2190001	ID:109594824 transketolase 1 (fragment) [Pseudomonas sp. P14]	0	FALSE	62.573	82	13	15	122	4	148	16.6	5.22	358.38	13	0	0.737	5.18	7.596	0.807326	0.00180843	0.00470698	16.33	31.46	31.86	113	166.3	20.7				1.51957e+07	2.23727e+07	2.78377e+06	High	High	High	1
FALSE	High	Master Protein	P14_v1_1140014	ID:109594448 purU| Formyltetrahydrofolate deformylase [Pseudomonas sp. P14]	0	FALSE	62.429	59	14	17	66	14	283	32.4	6.57	168.97	14	0	0.925	1.576	1.649	0.99493	0.926838	0.959397	25.11	13.81	17.72	111.3	117	71.7				1.5585e+07	1.63767e+07	1.00446e+07	High	High	High	1
FALSE	High	Master Protein	P14_v1_460039	ID:109592742 hisG| ATP phosphoribosyltransferase [Pseudomonas sp. P14]	0	FALSE	62.422	69	12	13	71	12	211	23	8.1	199.47	12	0	0.844	1.396	1.405	0.95737	0.976559	0.984725	20.38	32.16	29.47	101.5	115.8	82.7				1.1328e+07	1.29265e+07	9.22487e+06	High	High	High	1
FALSE	High	Master Protein	P14_v1_590018	ID:109593167 protein of unknown function [Pseudomonas sp. P14]	0	FALSE	62.411	45	15	16	55	15	397	44	9.41	147.33	15	0	0.973	1.079	0.998	0.993336	0.999657	0.97678	7.56	34.06	38.74	101.2	108.2	90.6				2.30556e+06	2.46372e+06	2.06343e+06	High	High	High	1
FALSE	High	Master Protein	P14_v1_450037	ID:109592703 NADPH:quinone reductase [Pseudomonas sp. P14]	0	FALSE	62.407	43	12	14	45	12	325	33.8	8.06	148.53	12	0	1.486	1.192	0.827	0.184789	0.996599	0.890984	17.68	49.02	61.16	123.1	78.4	98.5				7.02151e+06	4.47512e+06	5.62193e+06	High	High	High	1
FALSE	High	Master Protein	P14_v1_430032	ID:109592619 lpdV| Dihydrolipoyl dehydrogenase [Pseudomonas sp. P14]	0	FALSE	62.4	36	12	14	56	12	459	48.2	6.73	176.27	12	0	0.944	1.649	2.028	0.984666	0.839017	0.725668	17.45	16.37	25.51	119	128	53				5.63578e+06	6.06482e+06	2.5104e+06	High	High	High	1
FALSE	High	Master Protein	P14_v1_820010	ID:109593810 HNH endonuclease [Pseudomonas sp. P14]	0	FALSE	62.385	69	13	15	83	13	247	27.4	6.4	248.42	13	0	0.904	1.38	1.39	0.984666	0.981933	0.98109	19.59	25.12	25.29	105.8	113.5	80.7				1.10387e+07	1.18473e+07	8.42066e+06	High	High	High	1
FALSE	High	Master Protein	P14_v1_50047	ID:109590074 Quinone oxidoreductase [Pseudomonas sp. P14]	0	FALSE	62.346	58	12	12	42	12	340	36.7	5.78	141.47	12	0	1.142	0.915	0.844	0.89459	0.941818	0.911741	6.95	21.44	10.31	103.5	94.3	102.3				3.47135e+06	3.16295e+06	3.43055e+06	High	High	High	1
FALSE	High	Master Protein	P14_v1_310015	ID:109592094 xthA| exodeoxyribonuclease III [Pseudomonas sp. P14]	0	FALSE	62.323	71	16	16	66	16	270	30.9	6.61	157.48	16	0	1.026	1.23	1.168	0.978915	0.999657	0.996417	24.04	33.92	15.35	106	103.4	90.6				6.15782e+06	6.00611e+06	5.2599e+06	High	High	High	1
FALSE	High	Master Protein	P14_v1_480013	ID:109592794 dapB| 4-hydroxy-tetrahydrodipicolinate reductase [Pseudomonas sp. P14]	0	FALSE	62.268	56	13	14	103	13	267	28.4	6.04	309.47	13	0	1.117	1.41	1.187	0.894017	0.982006	0.960855	26.54	33.51	41.67	113.5	105.6	80.9				2.83251e+07	2.63695e+07	2.01966e+07	High	High	High	1
FALSE	High	Master Protein	P14_v1_100088	ID:109590762 glutathione S-transferase [Pseudomonas sp. P14]	0	FALSE	62.104	75	12	14	46	12	207	23.1	6.54	141.11	12	0	0.791	1.257	1.605	0.806143	0.992686	0.93347	17.07	15.37	22.84	100.1	119.8	80.1				5.87091e+06	7.02958e+06	4.70043e+06	High	High	High	1	Met-loss [N-Term]
FALSE	High	Master Protein	P14_v1_730024	ID:109593585 pstS| Phosphate-binding protein PstS [Pseudomonas sp. P14]	0	FALSE	62.016	45	10	12	48	10	332	34.9	8.97	176.85	10	0	0.969	0.571	0.54	0.994001	0.346616	0.469069	12.17	36.62	21.04	77.7	72.9	149.5				3.62565e+06	3.40024e+06	6.97506e+06	High	High	High	1
FALSE	High	Master Protein	P14_v1_420004	ID:109592554 recD| exodeoxyribonuclease V subunit RecD [Pseudomonas sp. P14]	0	FALSE	62.014	30	15	15	39	15	691	75.5	7.18	122.16	15	0	1.04	0.874	0.844	0.984666	0.941797	0.93347	27.79	25.45	36.84	96	83	121				1.67861e+06	1.45024e+06	2.11579e+06	High	High	High	1
FALSE	High	Master Protein	P14_v1_620002	ID:109593247 Uncharacterized isomerase PA2770 [Pseudomonas sp. P14]	0	FALSE	61.956	45	10	14	97	10	262	28.5	5.02	296.19	10	0	0.52	3.562	7.418	0.0709126	0.0480024	0.00593628	18.85	16.5	22.92	102.6	178.4	19				2.67647e+07	4.65429e+07	4.94911e+06	High	High	High	1
FALSE	High	Master Protein	P14_v1_240064	ID:109591748 rplX| 50S ribosomal subunit protein L24 [Pseudomonas sp. P14]	0	FALSE	61.847	61	7	13	337	7	104	11.3	10.05	929.48	7	0	0.72	1.191	1.665	0.746502	0.989153	0.962298	21.63	55.67	53.88	95.7	127.6	76.7				6.57258e+07	8.76186e+07	5.2691e+07	High	High	High	1
FALSE	High	Master Protein	P14_v1_330044	ID:109592233 ghrB| Glyoxylate/hydroxypyruvate reductase B [Pseudomonas sp. P14]	0	FALSE	61.832	51	14	15	63	14	324	34.9	6.96	179.59	14	0	0.899	1.574	1.658	0.958614	0.907703	0.912542	11.55	13.98	18.23	111	120.4	68.6				6.00863e+06	6.51806e+06	3.71282e+06	High	High	High	1
FALSE	High	Master Protein	P14_v1_30207	ID:109589839 pntA| fragment of pyridine nucleotide transhydrogenase subunit alpha (part 1) [Pseudomonas sp. P14]	0	FALSE	61.747	48	15	16	101	15	373	38.9	5.92	263.08	15	0	2.55	1.369	0.602	6.56627e-05	0.989781	0.370936	36.8	19.01	32.92	145.1	51.9	103.1				4.49971e+07	1.6088e+07	3.19708e+07	High	High	High	1
FALSE	High	Master Protein	P14_v1_950020	ID:109594149 Xaa-Pro aminopeptidase [Pseudomonas sp. P14]	0	FALSE	61.743	40	15	17	54	15	602	65.3	5.6	142.81	15	0	1.007	0.795	0.711	0.984666	0.714788	0.721311	20.11	44.75	29.49	88.2	91.6	120.2				7.97237e+06	8.27696e+06	1.08584e+07	High	High	High	1
FALSE	High	Master Protein	P14_v1_20225	ID:109589618 Acyl-CoA dehydrogenase [Pseudomonas sp. P14]	0	FALSE	61.713	35	16	16	66	15	600	66	6.42	158.53	16	0	1.731	1.16	0.642	0.107959	0.989781	0.747875	23.12	40.75	23.59	127.2	74	98.8				1.68875e+06	982997	1.3115e+06	High	High	High	1
FALSE	High	Master Protein	P14_v1_720001	ID:109593540 chrR| Quinone reductase [Pseudomonas sp. P14]	0	FALSE	61.685	68	10	13	68	10	186	20.3	8.41	241.76	10	0	1.168	1.036	0.729	0.811758	0.940122	0.586656	17.76	13.17	33.68	125.4	91.4	83.3				2.10642e+07	1.53545e+07	1.39905e+07	High	High	High	1	Met-loss [N-Term]
FALSE	High	Master Protein	P14_v1_490013	ID:109592826 exodeoxyribonuclease III [Pseudomonas sp. P14]	0	FALSE	61.602	43	9	15	61	9	259	29.8	5.29	202.88	9	0	0.827	1.436	1.672	0.885631	0.948129	0.896107	24.97	35.11	27.94	105.3	122.3	72.3				5.16524e+06	5.99885e+06	3.54795e+06	High	High	High	1
FALSE	High	Master Protein	P14_v1_20180	ID:109589573 rhdA| Thiosulfate sulfurtransferase [Pseudomonas sp. P14]	0	FALSE	61.597	62	12	14	52	12	269	29.5	6.18	148.51	12	0	1.197	1.096	0.841	0.77727	0.992929	0.911551	29.95	25.95	55.91	97.3	107.5	95.2				3.92503e+06	4.33373e+06	3.83772e+06	High	High	High	1	Met-loss [N-Term]
FALSE	High	Master Protein	P14_v1_80103	ID:109590566 astE| Succinylglutamate desuccinylase [Pseudomonas sp. P14]	0	FALSE	61.536	45	13	14	87	13	335	37.6	6.27	232.3	13	0	0.977	1.199	1.537	0.985193	0.993736	0.951177	15.06	55.34	55.56	111.6	117.9	70.4				1.01737e+07	1.07503e+07	6.41887e+06	High	High	High	1
FALSE	High	Master Protein	P14_v1_170052	ID:109591293 trpD| Anthranilate phosphoribosyltransferase [Pseudomonas sp. P14]	0	FALSE	61.462	57	12	14	85	12	349	37.2	5.77	264.68	12	0	0.965	1.139	1.08	0.994001	0.989781	0.976549	18.22	24.61	32.37	104.2	106.7	89.1				5.70196e+06	5.83857e+06	4.87471e+06	High	High	High	1
FALSE	High	Master Protein	P14_v1_180014	ID:109591322 nagZ| Beta-hexosaminidase [Pseudomonas sp. P14]	0	FALSE	61.393	45	11	11	86	11	336	36.5	6.33	260.51	11	0	0.987	1.352	1.453	0.989511	0.981606	0.962298	20.55	12.37	12.98	114	108.6	77.4				6.88398e+06	6.55758e+06	4.67775e+06	High	High	High	1
FALSE	High	Master Protein	P14_v1_20209	ID:109589602 Metal ABC transporter ATPase [Pseudomonas sp. P14]	0	FALSE	61.156	57	14	15	53	14	322	37	9.57	140.96	14	0	1.206	0.723	0.54	0.874695	0.775668	0.523808	23.19	35.98	60.82	94.5	71.7	133.7				2.15138e+06	1.6323e+06	3.04378e+06	High	High	High	1
FALSE	High	Master Protein	P14_v1_990004	ID:109594212 rarA| Replication-associated recombination protein A [Pseudomonas sp. P14]	0	FALSE	61.037	45	12	12	32	12	436	47.4	6.18	100.36	12	0	1.34	0.152	0.1	0.732527	1.6836e-06	1.38557e-05	11.04	13.4	28.14	30	23.2	246.8				603890	466679	4.96577e+06	High	High	High	1
FALSE	High	Master Protein	P14_v1_20182	ID:109589575 Phosphoserine phosphatase [Pseudomonas sp. P14]	0	FALSE	61.029	38	14	15	75	14	415	45	5.48	205.71	14	0	0.872	1.783	1.79	0.979569	0.839017	0.896324	13.23	28.56	29.55	110.7	126.9	62.3				1.19911e+07	1.37492e+07	6.75106e+06	High	High	High	1
FALSE	High	Master Protein	P14_v1_1020013	ID:109594270 metF| 5,10-methylenetetrahydrofolate reductase [Pseudomonas sp. P14]	0	FALSE	61.004	52	12	15	88	12	281	31.3	6.23	256.69	12	0	1.051	1.982	1.826	0.951676	0.648016	0.875878	7.85	29.1	38.21	118.8	123.4	57.8				1.01323e+07	1.05253e+07	4.92769e+06	High	High	High	1
FALSE	High	Master Protein	P14_v1_20056	ID:109589449 ybeZ| PhoH-like protein [Pseudomonas sp. P14]	0	FALSE	61.002	52	13	14	63	13	332	37.5	6.96	159.51	13	0	0.894	0.929	1.036	0.951676	0.920286	0.968504	26.44	15.28	28.08	91.3	96.4	112.3				4.92757e+06	5.19935e+06	6.05822e+06	High	High	High	1
FALSE	High	Master Protein	P14_v1_60049	ID:109590243 two-component system, NtrC family, sensor kinase [Pseudomonas sp. P14]	0	FALSE	60.967	26	14	15	22	14	677	75.8	5.86	59.37	14	0	0.795	0.064	0.062	0.880241	2.60759e-11	1.29754e-08	0	42.67	0	5.6	1.8	292.6				74958.4	24623.9	3.94777e+06	High	High	High	1
FALSE	High	Master Protein	P14_v1_100072	ID:109590746 ltaE| Low specificity L-threonine aldolase [Pseudomonas sp. P14]	0	FALSE	60.923	43	12	14	73	12	346	37.9	5.81	205.48	12	0	1.017	0.47	0.538	0.984666	0.0763018	0.386831	19.75	34.44	27.3	72.6	76.1	151.3				5.31973e+06	5.57073e+06	1.10788e+07	High	High	High	1
FALSE	High	Master Protein	P14_v1_780019	ID:109593730 two-component system, cell cycle sensor histidine kinase and response regulator CckA [Pseudomonas sp. P14]	0	FALSE	60.772	26	19	19	46	19	795	88.4	5.33	112.98	19	0	1.017	1.056	0.965	0.984666	0.989781	0.959397	23.48	24.28	30.4	92.3	96.3	111.4				2.59347e+06	2.70735e+06	3.1319e+06	High	High	High	1
FALSE	High	Master Protein	P14_v1_680028	ID:109593465 gamma-glutamylputrescine oxidase [Pseudomonas sp. P14]	0	FALSE	60.722	33	13	13	39	13	429	47.4	7.49	114.56	13	0	0.611	7.84	12.399	0.124529	0.000133865	4.22148e-08	15.71	19.16	10.3	92.8	199.4	7.8				1.35155e+06	2.9051e+06	114274	High	High	High	1
FALSE	High	Master Protein	P14_v1_210047	ID:109591548 Metal-chelation protein CHAD [Pseudomonas sp. P14]	0	FALSE	60.712	58	15	15	67	15	259	29.5	10.27	162.17	15	0	0.461	0.568	1.038	0.00105506	0.29634	0.966503	15.36	31.28	63.92	62.4	132	105.5				3.13494e+06	6.62868e+06	5.29935e+06	High	High	High	1	Met-loss [N-Term]
FALSE	High	Master Protein	P14_v1_430004	ID:109592591 Flagellar hook-associated protein 2 [Pseudomonas sp. P14]	0	FALSE	60.657	37	13	15	52	13	463	47.7	5.16	150.06	13	0	1.041	0.851	0.87	0.962994	0.868073	0.926846	30.28	38.61	34.29	94.4	88	117.6				4.13656e+06	3.85524e+06	5.14996e+06	High	High	High	1
FALSE	High	Master Protein	P14_v1_50154	ID:109590181 Nonspecific acid phosphatase [Pseudomonas sp. P14]	0	FALSE	60.642	50	12	13	58	12	333	37.5	5.54	171.89	12	0	1.611	0.655	0.479	0.0754736	0.434044	0.318887	38.36	27.69	36.43	95.5	72.1	132.4				6.58753e+06	4.97604e+06	9.1323e+06	High	High	High	1
FALSE	High	Master Protein	P14_v1_320045	ID:109592181 bamB| Outer membrane protein assembly factor BamB [Pseudomonas sp. P14]	0	FALSE	60.64	44	16	16	75	16	380	40.7	5.05	208.16	16	0	0.95	1.364	1.721	0.994001	0.984595	0.918725	28.24	47.48	28.57	110.9	115.7	73.4				1.05986e+07	1.10646e+07	7.01802e+06	High	High	High	1
FALSE	High	Master Protein	P14_v1_710010	ID:109593521 map| methionine aminopeptidase [Pseudomonas sp. P14]	0	FALSE	60.534	52	10	14	141	10	260	28.9	6.6	359.3	10	0	0.806	1.038	1.289	0.92833	0.948129	0.992192	11.44	25.26	21.89	94.1	115.4	90.4				1.14781e+07	1.4074e+07	1.10256e+07	High	High	High	1
FALSE	High	Master Protein	P14_v1_120075	ID:109590937 nfrB| bacteriophage N4 adsorption protein [Pseudomonas sp. P14]	0	FALSE	60.503	25	16	16	50	16	724	82.4	7.24	135.02	16	0	1.249	1.141	0.88	0.682608	0.996599	0.936706	26.46	18.89	24.15	107.6	88.4	104				2.69236e+06	2.21417e+06	2.60344e+06	High	High	High	1
FALSE	High	Master Protein	P14_v1_440008	ID:109592636 panC| pantothenate synthetase [Pseudomonas sp. P14]	0	FALSE	60.494	69	12	14	75	12	287	31.2	7.12	202.16	12	0	0.998	1.653	1.758	0.984666	0.901804	0.896324	15.9	16.47	23.2	114.2	121.2	64.6				7.58475e+06	8.0501e+06	4.28786e+06	High	High	High	1
FALSE	High	Master Protein	P14_v1_190022	ID:109591399 selO| Protein adenylyltransferase SelO [Pseudomonas sp. P14]	0	FALSE	60.474	39	16	17	42	16	486	54.8	5.47	109.66	16	0	0.891	0.809	0.9	0.948261	0.890393	0.947509	12.64	38.4	18.99	92.4	99.3	108.3				1.80484e+06	1.94075e+06	2.11631e+06	High	High	High	1
FALSE	High	Master Protein	P14_v1_380028	ID:109592427 protein of unknown function [Pseudomonas sp. P14]	0	FALSE	60.4	4	12	13	45	11	4546	443.9	3.89	163.08	12	1	1.164	4.441	3.252	0.857401	0.00987214	0.282848	27.42	77.97	79.97	142.1	110.6	47.3				9.75454e+06	7.59472e+06	3.25145e+06	High	High	High	1
FALSE	High	Master Protein	P14_v1_340038	ID:109592271 pdxH| Pyridoxine/pyridoxamine 5'-phosphate oxidase [Pseudomonas sp. P14]	0	FALSE	60.378	72	11	14	102	11	215	24.6	6.7	243.84	11	0	1.329	1.378	1.056	0.473196	0.988277	0.959397	6.14	28.61	27.59	121.1	92.9	86.1				1.52654e+07	1.17114e+07	1.0851e+07	High	High	High	1	Met-loss [N-Term]
FALSE	High	Master Protein	P14_v1_470024	ID:109592768 conserved protein of unknown function [Pseudomonas sp. P14]	0	FALSE	60.375	43	12	13	120	12	340	37.1	5.03	373.32	12	0	0.954	1.283	1.37	0.986344	0.999657	0.996963	18.62	13.73	27.07	109.4	111.8	78.8				1.92386e+07	1.9665e+07	1.38475e+07	High	High	High	1
FALSE	High	Master Protein	P14_v1_600006	ID:109593185 hemN| coproporphyrinogen III dehydrogenase [Pseudomonas sp. P14]	0	FALSE	60.201	44	17	19	44	17	460	52.6	6.09	98.84	17	0	0.774	100	100	0.66474	1.38203e-16	1.15948e-16	12.36			130.7	169.3					2.86446e+06	3.71068e+06		High	High	n/a	1
FALSE	High	Master Protein	P14_v1_200041	ID:109591475 LysR family transcriptional regulator, mexEF-oprN operon transcriptional activator [Pseudomonas sp. P14]	0	FALSE	60.193	52	12	13	38	12	308	35	9.07	107.15	12	0	1.19	0.826	0.688	0.898103	0.907703	0.801783	30.26	29.86	10.88	109.9	61.5	128.7				1.42196e+06	795694	1.66535e+06	High	High	High	1
FALSE	High	Master Protein	P14_v1_50015	ID:109590042 dapB| 4-hydroxy-tetrahydrodipicolinate reductase [Pseudomonas sp. P14]	0	FALSE	60.057	61	9	11	46	9	275	28.9	6.86	158.24	9	0	0.592	1.256	2.386	0.0589822	0.973252	0.430146	31.48	30.09	24.65	89.9	152.9	57.2				1.99246e+06	3.38633e+06	1.26698e+06	High	High	High	1
FALSE	High	Master Protein	P14_v1_400050	ID:109592515 DUF480 domain-containing protein [Pseudomonas sp. P14]	0	FALSE	59.822	54	13	15	54	13	215	23.9	5.47	161.08	13	0	1.351	0.842	0.715	0.40277	0.890917	0.805028	21.45	31.48	47.89	97.9	82.7	119.4				3.07835e+06	2.59767e+06	3.75258e+06	High	High	High	1
FALSE	High	Master Protein	P14_v1_240060	ID:109591744 rplF| 50S ribosomal subunit protein L6 [Pseudomonas sp. P14]	0	FALSE	59.811	75	11	18	330	11	177	19.1	9.73	899.77	11	0	0.82	1.323	1.569	0.939049	0.993702	0.976549	19.1	37.85	47.87	105	121	74				2.22699e+08	2.56633e+08	1.5684e+08	High	High	High	1
FALSE	High	Master Protein	P14_v1_10249	ID:109589265 Lipoprotein [Pseudomonas sp. P14]	0	FALSE	59.793	51	12	16	167	12	225	24.4	8.92	369.43	12	0	1.576	1.065	0.638	0.121682	0.949429	0.433033	13.89	35.38	27.99	118.8	70.7	110.5				5.25091e+07	3.12609e+07	4.88505e+07	High	High	High	1
FALSE	High	Master Protein	P14_v1_20139	ID:109589532 livF| branched chain amino acid/phenylalanine ABC transporter ATP binding subunit LivF [Pseudomonas sp. P14]	0	FALSE	59.781	53	11	16	48	11	238	26.3	8.85	155.89	11	0	1.009	0.234	0.26	0.984666	0.000185341	0.0208341	9.64	38.3	58.77	52.8	64.1	183.1				2.87123e+06	3.48806e+06	9.95395e+06	High	High	High	1
FALSE	High	Master Protein	P14_v1_130002	ID:109590947 Skp-like protein [Pseudomonas sp. P14]	0	FALSE	59.653	56	15	15	115	15	167	18.8	9.39	326.42	15	0	0.895	1.134	1.215	0.984666	0.975244	0.970122	25.47	18.06	44.63	104.4	112.7	82.9				4.5285e+07	4.88596e+07	3.59434e+07	High	High	High	1
FALSE	High	Master Protein	P14_v1_390030	ID:109592457 opgH| osmoregulated periplasmic glucans (OPGs) biosynthesis protein H [Pseudomonas sp. P14]	0	FALSE	59.586	22	13	14	36	13	857	95.8	8.18	105.81	13	0	1.179	1.444	1.325	0.895216	0.901914	0.944122	14.68	9.1	32.72	100.1	108.4	91.4				1.92448e+06	2.08375e+06	1.75703e+06	High	High	High	1	Met-loss [N-Term]
FALSE	High	Master Protein	P14_v1_640017	ID:109593327 calB| putative coniferyl aldehyde dehydrogenase [Pseudomonas sp. P14]	0	FALSE	59.557	43	13	13	53	13	476	52.4	8.91	180.89	13	0	0.741	0.884	1.224	0.554084	0.935849	0.987596	17.6	18.7	19.98	85.4	112.5	102.1				2.36594e+06	3.11822e+06	2.82857e+06	High	High	High	1
FALSE	High	Master Protein	P14_v1_30125	ID:109589757 trpA| tryptophan synthase subunit alpha [Pseudomonas sp. P14]	0	FALSE	59.499	50	11	11	73	11	269	28.4	5.35	260.26	11	0	0.484	0.6	1.275	0.0300828	0.231135	0.97678	6.26	31.76	46.22	63.5	133.3	103.2				2.15024e+07	4.51726e+07	3.49567e+07	High	High	High	1
FALSE	High	Master Protein	P14_v1_160011	ID:109591181 glutathione S-transferase [Pseudomonas sp. P14]	0	FALSE	59.467	53	12	16	112	12	208	24	6.64	297.55	12	0	1.008	1.683	1.434	0.962994	0.901804	0.999424	12.39	32.5	33.92	112.6	110.3	77.1				2.59011e+07	2.53806e+07	1.77386e+07	High	High	High	1
FALSE	High	Master Protein	P14_v1_270010	ID:109591877 GfdT protein [Pseudomonas sp. P14]	0	FALSE	59.435	40	13	13	36	13	387	42.4	6.33	122.31	13	0	30.657	0.276	0.01	1.64131e-16	0.00195976	1.15948e-16	0	23.52	0	67.7	0.4	232				2.63671e+06	14501.3	9.04008e+06	High	Peak Found	High	1
FALSE	High	Master Protein	P14_v1_600022	ID:109593201 xanthine dehydrogenase small subunit [Pseudomonas sp. P14]	0	FALSE	59.365	32	13	13	51	13	484	53.1	6.18	148.98	13	0	0.871	1.194	1.244	0.92833	0.983107	0.972265	10.77	38.28	25.91	104	113.7	82.3				1.9827e+06	2.16783e+06	1.56902e+06	High	High	High	1
FALSE	High	Master Protein	P14_v1_300052	ID:109592078 metZ| O-succinylhomoserine sulfhydrylase [Pseudomonas sp. P14]	0	FALSE	59.324	38	12	13	83	12	403	43.3	5.69	214.6	12	0	0.825	1.327	1.77	0.939049	0.989781	0.905767	14.21	19.61	32.05	102.7	128.4	69				1.02271e+07	1.2789e+07	6.86977e+06	High	High	High	1	Met-loss [N-Term]
FALSE	High	Master Protein	P14_v1_1000004	ID:109594229 aroF| 3-deoxy-7-phosphoheptulonate synthase, Tyr-sensitive [Pseudomonas sp. P14]	0	FALSE	59.279	47	14	16	88	14	358	39	6.39	269.98	14	0	0.748	1.554	1.916	0.839066	0.948129	0.911741	14.7	31.92	39.49	103	130.5	66.5				1.84892e+07	2.34063e+07	1.19322e+07	High	High	High	1	Met-loss [N-Term]
FALSE	High	Master Protein	P14_v1_480023	ID:109592804 tpiA| triose-phosphate isomerase [Pseudomonas sp. P14]	0	FALSE	59.267	65	12	14	75	12	251	26	5.07	241.89	12	0	0.923	1.399	1.549	0.994001	0.986216	0.977897	21.38	33.3	45.79	109.6	119.3	71.1				1.84744e+07	2.01061e+07	1.19771e+07	High	High	High	1
FALSE	High	Master Protein	P14_v1_710027	ID:109593538 DUF4197 domain-containing protein [Pseudomonas sp. P14]	0	FALSE	59.267	62	11	12	53	11	228	23.8	9.04	171.27	11	0	0.883	7.1	8.02	0.968659	0.000281172	0.00232501	9.09	50.03	46.09	133.6	146.3	20.2				9.84853e+06	1.07816e+07	1.48577e+06	High	High	High	1
FALSE	High	Master Protein	P14_v1_420014	ID:109592564 thsB| putative cyclic ADP-D-ribose synthase ThsB [Pseudomonas sp. P14]	0	FALSE	59.22	73	10	15	120	10	187	21.3	9.23	324.71	10	0	0.911	1.631	1.724	0.989511	0.918265	0.94892	19.46	34.93	23.77	115.1	112.7	72.2				2.40685e+07	2.35705e+07	1.51044e+07	High	High	High	1
FALSE	High	Master Protein	P14_v1_490030	ID:109592843 puuB| gamma-glutamylputrescine oxidase [Pseudomonas sp. P14]	0	FALSE	59.219	43	14	14	41	12	430	46.6	7.31	95.87	14	1	0.826	1.213	1.404	0.887917	0.979219	0.93347	20.69	37.75	48.39	86.7	119	94.3				1.41543e+06	1.94409e+06	1.54046e+06	High	High	High	1
FALSE	High	Master Protein	P14_v1_310029	ID:109592108 ampC| Beta-lactamase [Pseudomonas sp. P14]	0	FALSE	59.122	39	12	13	63	12	380	40.8	8.32	165.08	12	0	0.786	1.355	1.758	0.759715	0.956566	0.855376	17.09	24.7	27.15	100.7	127.5	71.8				4.4458e+06	5.62867e+06	3.16913e+06	High	High	High	1
FALSE	High	Master Protein	P14_v1_340020	ID:109592253 quiP| Acyl-homoserine lactone acylase QuiP [Pseudomonas sp. P14]	0	FALSE	59.1	22	14	15	29	14	816	89	8.46	95.73	14	0	1.346	0.818	0.663	0.640601	0.927459	0.778761	50.27	25.22	46.72	102.1	78.9	119				1.21275e+06	937477	1.41326e+06	High	High	High	1
FALSE	High	Master Protein	P14_v1_860008	ID:109593919 thyA| Thymidylate synthase [Pseudomonas sp. P14]	0	FALSE	59.071	50	15	17	68	15	323	36.7	5.68	166.71	15	0	0.884	0.929	1.005	0.947614	0.9464	0.971645	10.13	38.05	43.4	88.9	99.4	111.8				3.63062e+06	4.05759e+06	4.56402e+06	High	High	High	1
FALSE	High	Master Protein	P14_v1_440027	ID:109592655 mrcB| peptidoglycan glycosyltransferase/peptidoglycan DD-transpeptidase MrcB [Pseudomonas sp. P14]	0	FALSE	59.05	30	15	19	47	15	773	85.1	9.07	118.22	15	0	1.21	1.032	0.839	0.895216	0.990692	0.926846	13.27	26.93	16.42	107.5	90.3	102.2				1.49141e+06	1.25214e+06	1.41774e+06	High	High	High	1
FALSE	High	Master Protein	P14_v1_870020	ID:109593954 diguanylate cyclase [Pseudomonas sp. P14]	0	FALSE	59.013	23	14	16	42	14	861	95.8	5.76	115.28	14	0	0.902	1.777	1.748	0.954962	0.677332	0.754515	7.55	34.77	33.7	113.5	122.8	63.7				2.41414e+06	2.61182e+06	1.35407e+06	High	High	High	1
FALSE	High	Master Protein	P14_v1_1360004	ID:109594647 Type II and III secretion system family protein [Pseudomonas sp. P14]	0	FALSE	58.937	57	13	15	66	13	246	26.8	6.13	161.92	13	0	0.918	1.4	1.262	0.994001	0.977723	0.986275	9.16	20.88	34.53	111.1	110	79				1.45801e+07	1.44355e+07	1.03683e+07	High	High	High	1
FALSE	High	Master Protein	P14_v1_760003	ID:109593645 dapA| 4-hydroxy-tetrahydrodipicolinate synthase [Pseudomonas sp. P14]	0	FALSE	58.92	68	13	13	77	13	295	31.6	6.11	250.36	13	0	0.978	1.591	1.598	0.984666	0.916431	0.938608	14.95	28.6	30.18	113.8	115.9	70.3				1.08489e+07	1.10532e+07	6.69735e+06	High	High	High	1
FALSE	High	Master Protein	P14_v1_460035	ID:109592738 ttg2D| Toluene tolerance protein ttg2D [Pseudomonas sp. P14]	0	FALSE	58.907	60	11	14	114	11	215	23.7	9.19	305.65	11	0	1.103	1.553	1.553	0.898103	0.948129	0.977897	8.66	39.44	30.79	114.2	107.4	78.4				2.74097e+07	2.57818e+07	1.8828e+07	High	High	High	1
FALSE	High	Master Protein	P14_v1_1010003	ID:109594245 aguA| Agmatine deiminase [Pseudomonas sp. P14]	0	FALSE	58.878	32	10	13	50	10	368	40.8	5.07	177.62	10	0	1.41	1.093	0.826	0.312617	0.990397	0.8981	16.35	53.6	67.21	97.2	78.8	124				2.77264e+06	2.24861e+06	3.539e+06	High	High	High	1
FALSE	High	Master Protein	P14_v1_390009	ID:109592436 Poly(Hydroxyalkanoate) granule-associated protein [Pseudomonas sp. P14]	0	FALSE	58.869	40	14	14	235	14	256	25.7	10.08	690.59	14	0	1.059	0.929	0.848	0.936203	0.859342	0.759777	8.59	22.4	24.81	95.9	95.1	109				2.99758e+08	2.97118e+08	3.40405e+08	High	High	High	1
FALSE	High	Master Protein	P14_v1_510015	ID:109592900 dppA| dipeptide ABC transporter periplasmic binding protein [Pseudomonas sp. P14]	0	FALSE	58.857	37	14	16	40	14	536	60	7.84	92.78	14	0	1.022	0.949	0.999	0.985193	0.975244	0.978709	15.54	46.53	39.03	105.7	101.9	92.4				1.98061e+06	1.9083e+06	1.731e+06	High	High	High	1
FALSE	High	Master Protein	P14_v1_210039	ID:109591540 clpP| ATP-dependent Clp protease proteolytic subunit [Pseudomonas sp. P14]	0	FALSE	58.841	41	11	12	138	11	213	23.5	5.83	408.58	11	0	1.097	1.638	1.464	0.904071	0.916431	0.994896	19.36	42.84	85.02	113.5	120.2	66.3				4.20427e+07	4.45281e+07	2.45548e+07	High	High	High	1
FALSE	High	Master Protein	P14_v1_300023	ID:109592049 cheB| Protein-glutamate methylesterase/protein-glutamine glutaminase of group 1 operon [Pseudomonas sp. P14]	0	FALSE	58.828	62	14	15	69	14	370	39.5	8.72	163.56	14	0	0.759	1.418	1.993	0.696553	0.960215	0.796482	27.49	14.46	26.93	104	136	60.1				6.13157e+06	8.01927e+06	3.54187e+06	High	High	High	1
FALSE	High	Master Protein	P14_v1_370044	ID:109592399 lpxC| UDP-3-O-acyl-N-acetylglucosamine deacetylase [Pseudomonas sp. P14]	0	FALSE	58.705	38	12	13	94	12	303	33.2	5.19	289.89	12	0	0.899	1.265	1.43	0.984666	0.996599	0.999424	25.95	31.74	57.8	94.4	109.6	96				2.19273e+07	2.54685e+07	2.23177e+07	High	High	High	1
FALSE	High	Master Protein	P14_v1_1100010	ID:109594390 paaF| putative 2,3-dehydroadipyl-CoA hydratase [Pseudomonas sp. P14]	0	FALSE	58.701	58	12	13	121	12	257	27.7	5.54	329.76	12	0	1.082	1.104	0.952	0.919958	0.964781	0.866501	19.02	15.3	26.79	102.4	99.4	98.2				3.11775e+07	3.02826e+07	2.99059e+07	High	High	High	1	Met-loss [N-Term]
FALSE	High	Master Protein	P14_v1_30021	ID:109589653 lpd| Dihydrolipoyl dehydrogenase 3 [Pseudomonas sp. P14]	0	FALSE	58.697	36	13	14	60	13	466	49.3	6.09	168.95	13	0	1.391	1.635	1.208	0.3479	0.907703	0.98892	10.4	19.55	17.42	129.9	79.7	90.4				1.56188e+07	9.58331e+06	1.08661e+07	High	High	High	1
FALSE	High	Master Protein	P14_v1_110006	ID:109590773 ribF| bifunctional riboflavin kinase/FMN adenylyltransferase [Pseudomonas sp. P14]	0	FALSE	58.687	44	13	14	58	13	316	34.8	9.28	146.69	13	0	0.949	0.974	0.869	0.984666	0.948129	0.896324	12.75	30.48	60.03	94.5	100	105.4				5.39611e+06	5.7101e+06	6.0197e+06	High	High	High	1
FALSE	High	Master Protein	P14_v1_300028	ID:109592054 purine-binding chemotaxis protein CheW [Pseudomonas sp. P14]	0	FALSE	58.612	79	9	12	77	9	159	17.8	4.45	240.16	9	0	1.065	1.063	1.093	0.92833	0.948129	0.93347	31.32	29.98	30.7	102.9	96.6	100.5				1.88682e+07	1.77178e+07	1.84244e+07	High	High	High	1
FALSE	High	Master Protein	P14_v1_790015	ID:109593748 Alpha-ketoglutaric semialdehyde dehydrogenase [Pseudomonas sp. P14]	0	FALSE	58.579	33	12	13	43	12	526	55.5	5.44	147.2	12	0	0.948	0.429	0.478	0.984666	0.070149	0.357031	24.21	35.25	31.11	65.3	67.9	166.8				2.32947e+06	2.42289e+06	5.95096e+06	High	High	High	1	Met-loss [N-Term]
FALSE	High	Master Protein	P14_v1_340030	ID:109592263 OmpA-OmpF porin, OOP family [Pseudomonas sp. P14]	0	FALSE	58.567	48	10	13	171	10	230	24.1	5.31	548.15	10	0	1.78	1.067	0.679	0.0308865	0.949634	0.508015	13.33	43.92	40.17	126.6	71.1	102.2				7.62211e+07	4.2819e+07	6.15398e+07	High	High	High	1
FALSE	High	Master Protein	P14_v1_10268	ID:109589284 exported protein of unknown function [Pseudomonas sp. P14]	0	FALSE	58.489	49	13	14	34	13	371	40.8	4.88	121.16	13	0	1.564	0.783	0.483	0.0989326	0.787916	0.383523	9.23	26.1	27.53	106	66.5	127.5				3.86678e+06	2.42648e+06	4.64882e+06	High	High	High	1
FALSE	High	Master Protein	P14_v1_230028	ID:109591657 glk| Glucokinase [Pseudomonas sp. P14]	0	FALSE	58.485	52	13	15	62	13	319	33.9	6.6	176.48	13	0	0.088	0.722	7.718	1.64131e-16	0.787947	0.00470698	42	43.67	17.48	20.1	247.3	32.6				1.67118e+06	2.05575e+07	2.70641e+06	High	High	High	1
FALSE	High	Master Protein	P14_v1_160034	ID:109591204 NAD(P)H dehydrogenase (quinone) [Pseudomonas sp. P14]	0	FALSE	58.465	57	11	11	38	11	233	26.2	5.59	122.84	11	0	0.834	2.022	2.151	0.895216	0.502395	0.663805	29.75	34.04	10.9	123.8	128.8	47.3				3.81707e+06	3.97159e+06	1.45857e+06	High	High	High	1
FALSE	High	Master Protein	P14_v1_400031	ID:109592496 purR| HTH-type transcriptional repressor PurR [Pseudomonas sp. P14]	0	FALSE	58.42	51	11	12	40	11	340	36.6	6.33	120.91	11	0	1.243	1.136	0.695	0.744735	0.992664	0.781832	19.46	31.68	38.34	110.9	82.7	106.4				2.42131e+06	1.80597e+06	2.32411e+06	High	High	High	1
FALSE	High	Master Protein	P14_v1_10151	ID:109589167 Aldo/keto reductase [Pseudomonas sp. P14]	0	FALSE	58.381	64	13	13	43	13	303	32.7	8.98	122.8	13	0	1.272	0.353	0.262	0.767819	0.0276573	0.0312664	23.32	52.95	46.86	72.4	47	180.6				2.0546e+06	1.33313e+06	5.12345e+06	High	High	High	1
FALSE	High	Master Protein	P14_v1_340031	ID:109592264 OmpA-OmpF porin, OOP family [Pseudomonas sp. P14]	0	FALSE	58.347	42	10	13	73	10	239	24.7	4.83	213.87	10	0	2.065	0.736	0.321	0.00115834	0.58077	0.0605813	16.41	28.39	53.86	112.2	56.9	130.9				8.4215e+06	4.26772e+06	9.82669e+06	High	High	High	1
FALSE	High	Master Protein	P14_v1_40144	ID:109589986 uvrA| UvrABC system protein A [Pseudomonas sp. P14]	0	FALSE	58.256	22	16	17	59	9	838	91.1	6.74	158.44	16	0	0.899	0.816	0.843	0.949397	0.932747	0.95365	18.63	35.62	11.75	97.3	100.7	102.1				959634	992863	1.00675e+06	High	High	High	1
FALSE	High	Master Protein	P14_v1_20004	ID:109589397 Type I restriction enzyme, S subunit [Pseudomonas sp. P14]	0	FALSE	58.24	38	15	15	48	15	467	51.3	8.46	129.25	15	0	0.689	1.324	1.969	0.315197	0.948129	0.681783	26.94	31.12	31.44	98.3	132.5	69.1				2.30448e+06	3.10653e+06	1.62001e+06	High	High	High	1
FALSE	High	Master Protein	P14_v1_100041	ID:109590715 hisF| imidazole glycerol phosphate synthase subunit HisF [Pseudomonas sp. P14]	0	FALSE	58.199	60	14	15	59	14	256	27.1	5.36	156.43	14	0	0.824	1.048	1.215	0.883182	0.97682	0.999424	10.55	32.59	62.71	91.5	133.7	74.8				4.84648e+06	7.08594e+06	3.96495e+06	High	High	High	1
FALSE	High	Master Protein	P14_v1_80092	ID:109590555 argT| lysine/arginine/ornithine ABC transporter periplasmic binding protein [Pseudomonas sp. P14]	0	FALSE	58.189	46	12	14	150	12	261	28.3	7.85	395.15	12	0	0.876	0.699	0.81	0.980603	0.440852	0.713721	3.89	29.2	40.29	81.6	98.7	119.7				2.16256e+07	2.61394e+07	3.17038e+07	High	High	High	1
FALSE	High	Master Protein	P14_v1_80067	ID:109590530 AraC family transcriptional regulator [Pseudomonas sp. P14]	0	FALSE	58.172	48	13	14	45	13	326	36.5	7.01	133.39	13	0	0.878	0.792	0.903	0.939049	0.875309	0.944122	21.99	46.45	46.32	88.2	96.4	115.4				2.07523e+06	2.26918e+06	2.7175e+06	High	High	High	1
FALSE	High	Master Protein	P14_v1_50148	ID:109590175 moxR| Chaperone MoxR1 [Pseudomonas sp. P14]	0	FALSE	58.042	49	13	14	63	13	324	35.5	5.63	185.02	13	0	1.364	0.893	0.578	0.40277	0.927459	0.583045	8.35	23.77	39.24	97.8	64.1	138				2.80687e+06	1.83934e+06	3.96047e+06	High	High	High	1
FALSE	High	Master Protein	P14_v1_60035	ID:109590229 SAM-dependent methyltransferase [Pseudomonas sp. P14]	0	FALSE	57.992	24	16	16	24	16	835	91	6.01	65.24	16	0	0.226	0.702	2.635	6.30294e-10	0.852209	0.25999	30.51	76.36	20.25	14.9	220.2	64.8				108625	1.60011e+06	471089	High	High	High	1	Met-loss [N-Term]
FALSE	High	Master Protein	P14_v1_1180010	ID:109594488 potF| putrescine ABC transporter periplasmic binding protein [Pseudomonas sp. P14]	0	FALSE	57.963	47	11	13	49	11	367	40.6	8.27	171.83	11	0	3.83	1.311	0.371	2.32135e-11	0.989781	0.134558	15.5	14.49	24.79	148.7	35.7	115.6				8.71049e+06	2.09242e+06	6.77027e+06	High	High	High	1
FALSE	High	Master Protein	P14_v1_1000011	ID:109594236 Inactive transglutaminase fused to 7 transmembrane helices [Pseudomonas sp. P14]	0	FALSE	57.934	32	14	17	49	14	511	57.1	7.69	126.17	14	0	0.97	1.133	1.044	0.994001	0.989781	0.975856	10.2	34.19	38.79	110.1	100.6	89.2				5.73535e+06	5.24098e+06	4.64679e+06	High	High	High	1
FALSE	High	Master Protein	P14_v1_430027	ID:109592614 glutamine synthetase [Pseudomonas sp. P14]	0	FALSE	57.93	43	10	12	36	10	440	47.9	5.97	118.2	10	0	1.379	0.955	0.829	0.506465	0.975244	0.923489	14.14	25.14	28.96	114.2	77.5	108.3				2.33707e+06	1.58542e+06	2.21473e+06	High	High	High	1	Met-loss [N-Term]
FALSE	High	Master Protein	P14_v1_20034	ID:109589427 rhlE| ATP-dependent RNA helicase RhlE [Pseudomonas sp. P14]	0	FALSE	57.766	45	17	17	46	17	443	48.8	9.76	124	17	0	0.911	1.272	1.247	0.959555	0.975244	0.986222	20.02	42.82	29.69	99.3	108.8	92				2.73765e+06	3.00002e+06	2.53704e+06	High	High	High	1
FALSE	High	Master Protein	P14_v1_80002	ID:109590465 ATPase, AAA family [Pseudomonas sp. P14]	0	FALSE	57.754	53	14	14	103	14	281	32.1	5.97	251.21	14	0	1.063	1.265	1.158	0.947614	0.999657	0.985873	17.1	20.84	19.04	112	104.9	83.1				1.05219e+07	9.8586e+06	7.8028e+06	High	High	High	1
FALSE	High	Master Protein	P14_v1_670031	ID:109593434 folM| Dihydromonapterin reductase [Pseudomonas sp. P14]	0	FALSE	57.705	55	10	12	45	10	245	26.6	7.66	150.95	10	0	0.921	1.416	1.243	0.973118	0.919793	0.978709	17.07	49.23	66.97	104.4	114.1	81.5				2.70148e+06	2.95056e+06	2.108e+06	High	High	High	1
FALSE	High	Master Protein	P14_v1_220061	ID:109591625 gpx| Hydroperoxy fatty acid reductase gpx1 [Pseudomonas sp. P14]	0	FALSE	57.668	83	14	15	73	14	162	17.9	9.16	196.17	14	0	0.996	0.764	0.782	0.985193	0.68575	0.832657	19.27	32.03	28.67	89.8	92.4	117.7				6.21496e+06	6.39552e+06	8.14602e+06	High	High	High	1	Met-loss [N-Term]
FALSE	High	Master Protein	P14_v1_960003	ID:109594156 membrane fusion protein, multidrug efflux system [Pseudomonas sp. P14]	0	FALSE	57.626	48	14	16	57	14	362	38.3	6.81	176.5	14	0	1.251	1.166	0.883	0.653434	0.992629	0.925402	18.57	21.97	27.03	111.4	88.7	99.9				5.67449e+06	4.5206e+06	5.08738e+06	High	High	High	1
FALSE	High	Master Protein	P14_v1_1160009	ID:109594467 argJ| Glutamate N-acetyltransferase / Amino-acid acetyltransferase [Pseudomonas sp. P14]	0	FALSE	57.579	54	12	19	61	12	405	42.2	5.35	174.85	12	0	0.906	2.592	2.445	0.981628	0.327532	0.580553	16.05	57.31	38	113.1	128	58.9				8.00215e+06	9.06152e+06	4.16799e+06	High	High	High	1	Met-loss [N-Term]
FALSE	High	Master Protein	P14_v1_610013	ID:109593220 aroC| chorismate synthase [Pseudomonas sp. P14]	0	FALSE	57.503	45	15	15	55	15	363	39	6.54	153.1	15	0	0.864	1.161	1.734	0.939049	0.990692	0.896324	18.89	34.82	29.99	104.9	111.7	83.4				7.08866e+06	7.54662e+06	5.6347e+06	High	High	High	1
FALSE	High	Master Protein	P14_v1_610005	ID:109593212 lipoteichoic acid synthase [Pseudomonas sp. P14]	0	FALSE	57.476	26	12	14	60	12	685	76.5	6.86	152.31	12	0	1.468	1.392	1.014	0.185104	0.948129	0.977897	25.28	14.49	30.7	115.3	91.3	93.4				3.07297e+06	2.43285e+06	2.4888e+06	High	High	High	1
FALSE	High	Master Protein	P14_v1_530009	ID:109592968 ATPase [Pseudomonas sp. P14]	0	FALSE	57.475	57	12	12	28	12	289	30.9	6.01	98.95	12	0	0.94	1.489	2.125	0.979569	0.839297	0.413432	22.25	40.96	36.57	120.1	119.9	60				1.53115e+06	1.52868e+06	764905	High	High	High	1
FALSE	High	Master Protein	P14_v1_330015	ID:109592204 yaaA| peroxide stress resistance protein YaaA [Pseudomonas sp. P14]	0	FALSE	57.358	70	14	15	49	14	259	29.3	6.57	137.57	14	0	0.858	1.438	1.499	0.916791	0.912516	0.922898	18.24	41.03	38.33	106.6	114.1	79.2				2.7341e+06	2.9264e+06	2.03168e+06	High	High	High	1
FALSE	High	Master Protein	P14_v1_320047	ID:109592183 ybdL| methionine transaminase [Pseudomonas sp. P14]	0	FALSE	57.221	33	10	12	78	10	382	42.4	5.99	247.32	10	0	0.622	2.81	5.413	0.132895	0.117892	0.015642	5.15	52.81	31.94	90.5	171.2	38.3				4.16371e+06	7.87901e+06	1.76349e+06	High	High	High	1
FALSE	High	Master Protein	P14_v1_300014	ID:109592040 spuD| Putrescine-binding periplasmic protein SpuD [Pseudomonas sp. P14]	0	FALSE	57.131	43	10	12	35	10	359	39.5	5.64	121.14	10	0	1.558	1.41	0.808	0.239672	0.919793	0.899607	24.53	39.42	47.71	122.7	83.4	93.9				2.03769e+06	1.38536e+06	1.55965e+06	High	High	High	1
FALSE	High	Master Protein	P14_v1_440018	ID:109592646 Aminotransferase [Pseudomonas sp. P14]	0	FALSE	57.079	44	13	16	74	13	390	42.5	6.52	190.42	13	0	0.999	1.015	1.019	0.989739	0.975244	0.975856	19.61	33.27	18.78	100	95.8	104.1				3.2309e+06	3.09597e+06	3.36434e+06	High	High	High	1
FALSE	High	Master Protein	P14_v1_360009	ID:109592323 rimO| ribosomal protein S12 methylthiotransferase RimO [Pseudomonas sp. P14]	0	FALSE	56.943	39	11	11	35	11	443	49.3	5.02	93.14	11	0	1.05	2.844	2.426	0.965226	0.116466	0.247439	15.54	36.2	30.27	141.7	124	34.3				2.59334e+06	2.2697e+06	626905	High	High	High	1
FALSE	High	Master Protein	P14_v1_20122	ID:109589515 cbpA| curved DNA-binding protein [Pseudomonas sp. P14]	0	FALSE	56.915	56	16	17	94	16	319	34.8	9.19	224.34	16	0	1.014	1.206	1.189	0.959755	0.989781	0.962298	16.9	21.09	28.78	104.5	99.4	96.1				2.47096e+07	2.35117e+07	2.27149e+07	High	High	High	1
FALSE	High	Master Protein	P14_v1_380005	ID:109592404 trxB| thioredoxin reductase [Pseudomonas sp. P14]	0	FALSE	56.786	53	10	12	78	10	320	33.8	5.39	237.42	10	0	0.868	0.908	1.11	0.975423	0.855952	0.964686	17.86	42.07	33.61	99.5	113.7	86.9				1.19613e+07	1.36698e+07	1.04488e+07	High	High	High	1
FALSE	High	Master Protein	P14_v1_690018	ID:109593483 mdtA| multidrug efflux pump membrane fusion protein MdtA [Pseudomonas sp. P14]	0	FALSE	56.604	43	13	14	28	13	435	46.5	8.91	97.08	13	0	1.112	1.19	1.139	0.951522	0.975244	0.982326	28.21	30.35	40.6	133.3	106	60.7				1.34187e+06	1.06741e+06	611460	High	High	High	1
FALSE	High	Master Protein	P14_v1_600012	ID:109593191 dnaX| DNA polymerase III subunit tau [Pseudomonas sp. P14]	0	FALSE	56.565	24	15	16	36	15	691	74.4	4.75	94.79	15	0	0.885	0.747	0.828	0.939084	0.785065	0.896871	14.66	38.37	43.25	91.6	90.7	117.7				3.16572e+06	3.13675e+06	4.07117e+06	High	High	High	1
FALSE	High	Master Protein	P14_v1_560009	ID:109593064 pcaR| Pca regulon regulatory protein [Pseudomonas sp. P14]	0	FALSE	56.56	70	13	14	34	13	291	31.7	7.14	100.43	13	0	0.75	2.136	2.844	0.579861	0.398697	0.138595	31.33	20.13	40.71	114.9	144	41.1				2.05902e+06	2.58143e+06	736464	High	High	High	1	Met-loss [N-Term]
FALSE	High	Master Protein	P14_v1_90028	ID:109590597 tRNA-modifying protein YgfZ [Pseudomonas sp. P14]	0	FALSE	56.531	48	11	13	51	11	313	33.2	5.88	161.96	11	0	0.955	1.584	1.69	0.985807	0.875309	0.885996	21.66	38.62	31.65	106.2	122.7	71				4.78741e+06	5.52979e+06	3.20034e+06	High	High	High	1	Met-loss [N-Term]
FALSE	High	Master Protein	P14_v1_20144	ID:109589537 pncB| nicotinate phosphoribosyltransferase [Pseudomonas sp. P14]	0	FALSE	56.437	41	13	14	39	13	401	46.2	6.3	98.38	13	0	0.837	0.921	1.06	0.894888	0.977723	0.995257	11.3	39.49	24.66	94.1	103.4	102.4				935885	1.02852e+06	1.0184e+06	High	High	High	1
FALSE	High	Master Protein	P14_v1_720003	ID:109593542 ldcA| Lysine decarboxylase LdcA [Pseudomonas sp. P14]	0	FALSE	56.369	29	14	14	61	14	749	81.9	6.61	135.53	14	0	0.917	1.964	1.951	0.962994	0.503109	0.523808	30.15	41.13	37.67	117.1	118.8	64.1				1.80708e+06	1.83255e+06	989210	High	High	High	1
FALSE	High	Master Protein	P14_v1_1030007	ID:109594280 hemH| Ferrochelatase [Pseudomonas sp. P14]	0	FALSE	56.36	43	11	12	47	11	338	37.8	6.93	151.76	11	0	0.838	1.05	1.342	0.898103	0.981142	0.972265	21.78	25.76	38.73	99.9	117.7	82.4				3.66696e+06	4.31889e+06	3.02545e+06	High	High	High	1	Met-loss [N-Term]
FALSE	High	Master Protein	P14_v1_770020	ID:109593704 hemC| hydroxymethylbilane synthase [Pseudomonas sp. P14]	0	FALSE	56.197	49	11	11	62	11	313	33.4	5.44	211.17	11	0	1.001	1.804	1.825	0.984666	0.767964	0.843933	14.37	40.57	49.31	117.8	122.4	59.8				4.74021e+06	4.92557e+06	2.40753e+06	High	High	High	1
FALSE	High	Master Protein	P14_v1_20064	ID:109589457 LPS-assembly lipoprotein [Pseudomonas sp. P14]	0	FALSE	56.175	78	16	16	82	16	201	22.4	6.25	209.94	16	0	1.071	1.342	1.214	0.92833	0.990692	0.970122	10.23	24.21	25.75	112.3	101.5	86.1				1.91288e+07	1.72931e+07	1.46691e+07	High	High	High	1
FALSE	High	Master Protein	P14_v1_30085	ID:109589717 yidC| membrane protein insertase YidC [Pseudomonas sp. P14]	0	FALSE	56.123	26	11	15	84	11	560	61.9	8.75	241.1	11	0	0.993	1.756	1.586	0.985193	0.838	0.935011	13.87	13.97	28.7	114.1	111.3	74.6				7.47012e+06	7.29138e+06	4.88717e+06	High	High	High	1
FALSE	High	Master Protein	P14_v1_360041	ID:109592355 protein of unknown function [Pseudomonas sp. P14]	0	FALSE	56.096	31	13	15	43	13	540	57.3	5.54	100.55	13	0	0.883	1.727	2.084	0.954962	0.845661	0.749147	20.95	17.39	32.81	120.4	133.1	46.5				7.42629e+06	8.20669e+06	2.86511e+06	High	High	High	1
FALSE	High	Master Protein	P14_v1_450022	ID:109592688 ubiI| 2-octaprenylphenol 6-hydroxylase [Pseudomonas sp. P14]	0	FALSE	56.073	43	13	15	45	13	407	44.5	6.54	139.17	13	0	0.884	1.486	1.683	0.947614	0.905442	0.895703	24.5	25.3	35.69	103.8	126.3	69.9				3.39641e+06	4.13058e+06	2.28574e+06	High	High	High	1
FALSE	High	Master Protein	P14_v1_210034	ID:109591535 folD| bifunctional methylenetetrahydrofolate dehydrogenase/methenyltetrahydrofolate cyclohydrolase [Pseudomonas sp. P14]	0	FALSE	55.977	58	11	12	47	11	284	30.6	6.43	149.18	11	0	0.798	1.632	1.998	0.826841	0.867967	0.790762	24.73	14.87	11.07	101.6	133.6	64.8				5.62065e+06	7.39527e+06	3.58508e+06	High	High	High	1	Met-loss [N-Term]
FALSE	High	Master Protein	P14_v1_1140011	ID:109594445 sbcB| Exodeoxyribonuclease I [Pseudomonas sp. P14]	0	FALSE	55.931	40	15	16	40	15	477	55.1	6.23	113.16	15	0	0.847	1.072	1.488	0.904505	0.999657	0.885996	19.46	21.22	27.65	94.7	118.7	86.6				1.52477e+06	1.90981e+06	1.39346e+06	High	High	High	1
FALSE	High	Master Protein	P14_v1_880011	ID:109593967 Leu/Ile/Val-binding protein homolog 7 [Pseudomonas sp. P14]	0	FALSE	55.912	43	14	14	24	14	403	42.2	5.99	68.2	14	0	1.495	0.088	0.077	0.544893	1.31907e-08	1.92486e-07	15.86	25.32	62.13	14	11.8	274.2				97935.3	82062.6	1.9143e+06	High	High	High	1
FALSE	High	Master Protein	P14_v1_1300004	ID:109594595 Membrane protein [Pseudomonas sp. P14]	0	FALSE	55.828	67	11	14	91	11	201	21.5	6.8	253.03	11	0	0.812	11.829	13.104	0.92833	5.45371e-08	5.65896e-05	15.53	23.84	27.12	128.6	163.4	8				4.99115e+07	6.33902e+07	3.10288e+06	High	High	High	1
FALSE	High	Master Protein	P14_v1_270047	ID:109591914 Uncharacterized ABC transporter ATP-binding protein HI_1051 [Pseudomonas sp. P14]	0	FALSE	55.782	32	16	16	39	16	617	67.4	7.72	103.25	16	0	3.956	3.975	1.071	5.90633e-11	0.00835918	0.996963	16.61	38.11	6.96	214.8	48.7	36.5				3.47284e+06	787380	590697	High	High	High	1
FALSE	High	Master Protein	P14_v1_310039	ID:109592118 NADH dehydrogenase-like protein Rv1812c [Pseudomonas sp. P14]	0	FALSE	55.736	37	11	12	59	10	400	42.5	5.71	170.22	11	1	0.918	1.741	1.885	0.984666	0.867967	0.849144	18.84	32.65	30.91	112.8	124.6	62.6				7.59971e+06	8.39354e+06	4.21655e+06	High	High	High	1
FALSE	High	Master Protein	P14_v1_1080005	ID:109594363 bdcA| c-di-GMP-binding biofilm dispersal mediator protein [Pseudomonas sp. P14]	0	FALSE	55.681	65	12	13	60	12	249	25.5	4.93	169.36	12	0	1.239	0.896	0.696	0.657708	0.817557	0.539388	14.02	13.57	21.39	105.9	81.6	112.5				2.05533e+07	1.58418e+07	2.18445e+07	High	High	High	1
FALSE	High	Master Protein	P14_v1_640027	ID:109593337 zinc protease [Pseudomonas sp. P14]	0	FALSE	55.662	35	13	14	54	13	451	50.1	6.14	148.81	13	0	1.049	1.058	1.008	0.958614	0.989781	0.972265	24.48	29.41	6.37	106.6	101	92.4				4.15401e+06	3.93656e+06	3.5997e+06	High	High	High	1
FALSE	High	Master Protein	P14_v1_230040	ID:109591669 yebK| DNA-binding transcriptional repressor YebK [Pseudomonas sp. P14]	0	FALSE	55.659	54	13	13	49	13	290	31.7	6.8	137.09	13	0	0.937	1.127	1.226	0.983865	0.999657	0.986222	11.88	15.28	12.05	113	109.1	77.9				3.24025e+06	3.12796e+06	2.23518e+06	High	High	High	1
FALSE	High	Master Protein	P14_v1_460041	ID:109592744 hisC| Histidinol-phosphate aminotransferase [Pseudomonas sp. P14]	0	FALSE	55.64	38	13	13	81	13	348	38.8	5.26	223.2	13	0	0.685	1.722	2.488	0.619648	0.875183	0.662473	8.16	28.34	24.12	99.2	140.5	60.3				1.24294e+07	1.75962e+07	7.55901e+06	High	High	High	1
FALSE	High	Master Protein	P14_v1_50030	ID:109590057 N-methylhydantoinase B [Pseudomonas sp. P14]	0	FALSE	55.451	38	16	17	44	16	554	60.1	5.71	106.33	16	0	0.694	1.309	1.894	0.3479	0.948129	0.687692	18.2	40.85	52.39	97.5	157.6	44.9				1.91564e+06	3.09642e+06	881718	High	High	High	1
FALSE	High	Master Protein	P14_v1_960007	ID:109594160 sbp| sulfate/thiosulfate ABC transporter periplasmic binding protein Sbp [Pseudomonas sp. P14]	0	FALSE	55.341	46	14	14	75	14	335	36.7	7.56	196.75	14	0	0.258	1.671	5.934	1.03243e-07	0.872607	0.0223917	9.11	7.31	30.73	58.8	206.1	35.1				6.32917e+06	2.21811e+07	3.78083e+06	High	High	High	1
FALSE	High	Master Protein	P14_v1_30088	ID:109589720 dnaA| chromosomal replication initiator protein DnaA [Pseudomonas sp. P14]	0	FALSE	55.243	31	17	18	72	17	506	56.4	8.03	175.21	17	0	0.877	0.971	1.406	0.980729	0.890393	0.999864	18.65	41.87	50.76	67.1	151.4	81.5				1.17058e+07	2.6438e+07	1.42293e+07	High	High	High	1
FALSE	High	Master Protein	P14_v1_230004	ID:109591633 tdcG| L-serine deaminase III [Pseudomonas sp. P14]	0	FALSE	55.23	37	12	13	34	12	458	48.8	6.76	102.69	12	0	0.899	2.077	2.327	0.952888	0.455044	0.422328	17.47	17.61	34.63	122.4	134.4	43.1				2.57354e+06	2.82588e+06	906772	High	High	High	1	Met-loss [N-Term]
FALSE	High	Master Protein	P14_v1_10259	ID:109589275 N-acetylglucosaminyl-diphospho-decaprenol L-rhamnosyltransferase [Pseudomonas sp. P14]	0	FALSE	55.182	40	12	14	70	12	318	35.9	8.43	175.92	12	0	1.131	1.739	1.562	0.895216	0.830102	0.93347	7.97	17.45	32.44	124.7	101.2	74.1				9.24739e+06	7.50329e+06	5.49425e+06	High	High	High	1
FALSE	High	Master Protein	P14_v1_590006	ID:109593155 serC| phosphoserine/phosphohydroxythreonine aminotransferase [Pseudomonas sp. P14]	0	FALSE	55.179	35	14	14	96	14	335	37.1	5.34	242.37	14	0	0.841	1.57	1.971	0.952667	0.948129	0.896324	23.66	32.36	40.84	104.8	129.4	65.8				2.49245e+07	3.07605e+07	1.56509e+07	High	High	High	1
FALSE	High	Master Protein	P14_v1_320029	ID:109592165 cysE| Serine acetyltransferase [Pseudomonas sp. P14]	0	FALSE	55.164	55	13	14	49	13	261	28.2	6.73	121.54	13	0	0.749	1.301	1.408	0.625737	0.976559	0.959397	19.36	42.95	50.87	98.2	126.3	75.5				3.77478e+06	4.85224e+06	2.89971e+06	High	High	High	1
FALSE	High	Master Protein	P14_v1_80099	ID:109590562 astA| arginine N-succinyltransferase [Pseudomonas sp. P14]	0	FALSE	55.114	45	12	12	62	12	342	37.7	6.93	180.24	12	0	0.902	1.66	1.749	0.958614	0.825361	0.856115	13.89	4.33	23.92	111.4	124.7	63.9				4.98856e+06	5.58444e+06	2.86238e+06	High	High	High	1
FALSE	High	Master Protein	P14_v1_240010	ID:109591694 ribE| 6,7-dimethyl-8-ribityllumazine synthase [Pseudomonas sp. P14]	0	FALSE	55.096	73	8	9	133	8	158	16.4	5.5	375.72	8	0	0.846	1.592	1.872	0.95737	0.94039	0.926707	16.6	21.94	26.42	104.5	133.5	62.1				5.48943e+07	7.01396e+07	3.26321e+07	High	High	High	1
FALSE	High	Master Protein	P14_v1_60019	ID:109590213 Pyrophosphatase [Pseudomonas sp. P14]	0	FALSE	55.081	37	13	13	52	13	416	47.2	5.22	132.3	13	0	0.916	0.651	0.685	0.962926	0.553396	0.775827	11.95	25.24	14.49	79.6	87.9	132.5				2.13173e+06	2.35349e+06	3.54588e+06	High	High	High	1
FALSE	High	Master Protein	P14_v1_580001	ID:109593122 Collagenase and related proteases [Pseudomonas sp. P14]	0	FALSE	55.048	56	8	11	53	8	202	22.4	8.24	178.67	8	0	1.509	0.928	0.588	0.19186	0.875309	0.494313	11.09	41.1	45.74	112.1	73.3	114.6				9.82191e+06	6.42426e+06	1.00479e+07	High	High	High	1
FALSE	High	Master Protein	P14_v1_40008	ID:109589850 hemB| porphobilinogen synthase [Pseudomonas sp. P14]	0	FALSE	54.78	41	10	12	82	10	324	35.2	5.35	200.5	10	0	0.851	1.59	1.998	0.958614	0.916431	0.868028	5.39	38.33	30.88	104	123.1	72.8				1.29549e+07	1.5332e+07	9.06658e+06	High	High	High	1
FALSE	High	Master Protein	P14_v1_60050	ID:109590244 myo-inositol-1(or 4)-monophosphatase [Pseudomonas sp. P14]	0	FALSE	54.728	47	13	13	35	13	275	30.7	5.52	92.35	13	0		0.017	0.023		1.38203e-16	1.68638e-13		0	0	1.6	0.7	297.7				72693.3	31778.4	1.32915e+07	Peak Found	High	High	1
FALSE	High	Master Protein	P14_v1_30108	ID:109589740 trkA| NAD-binding component of Trk potassium transporters [Pseudomonas sp. P14]	0	FALSE	54.681	28	11	12	42	11	457	49.8	5.35	132.08	11	0	1.037	1.136	1.095	0.976239	0.999657	0.996417	23.62	32.42	22.31	112.4	98.7	88.8				3.12324e+06	2.74285e+06	2.46729e+06	High	High	High	1
FALSE	High	Master Protein	P14_v1_200042	ID:109591476 fadE| putative acyl-CoA dehydrogenase FadE2 [Pseudomonas sp. P14]	0	FALSE	54.648	45	15	15	43	15	409	45.2	6.47	99.11	15	0	1.71	1.202	0.689	0.101052	0.980679	0.765425	14.16	14.27	22.87	127.5	71.5	101				2.12249e+06	1.1898e+06	1.6799e+06	High	High	High	1
FALSE	High	Master Protein	P14_v1_30210	ID:109589842 caiB| Succinate--glutarate CoA-transferase [Pseudomonas sp. P14]	0	FALSE	54.599	40	11	13	25	11	406	43.6	5.47	85.66	11	0	1.181	0.689	0.736	0.902239	0.749871	0.852083	9.32	27.43	22.37	91.9	87.5	120.7				1.56841e+06	1.4927e+06	2.05928e+06	High	High	High	1
FALSE	High	Master Protein	P14_v1_240026	ID:109591710 UDP-glucose 4-epimerase [Pseudomonas sp. P14]	0	FALSE	54.578	41	11	12	44	11	310	33.3	5.82	128.25	11	0	0.9	0.816	0.859	0.951676	0.890393	0.93347	14.64	22.48	18.11	92.3	98.8	108.9				2.34468e+06	2.51051e+06	2.76776e+06	High	High	High	1	Met-loss [N-Term]
FALSE	High	Master Protein	P14_v1_470007	ID:109592751 LysR family transcriptional regulator [Pseudomonas sp. P14]	0	FALSE	54.518	48	11	12	39	11	295	32.8	5.91	118.36	11	0	1.036	0.696	0.673	0.984666	0.769552	0.741063	14.84	20.96	10.73	87.5	82.8	129.7				1.25501e+06	1.1871e+06	1.8603e+06	High	High	High	1
FALSE	High	Master Protein	P14_v1_90017	ID:109590586 3-hydroxyisobutyryl-CoA hydrolase [Pseudomonas sp. P14]	0	FALSE	54.424	39	11	12	57	11	368	40.4	6.47	172.83	11	0	1.188	1.02	0.836	0.811516	0.963828	0.896324	29.84	72.28	27.69	108.7	90.7	100.6				5.53197e+06	4.61907e+06	5.12132e+06	High	High	High	1	Met-loss [N-Term]
FALSE	High	Master Protein	P14_v1_560014	ID:109593069 pcaB| 3-carboxy-cis,cis-muconate cycloisomerase [Pseudomonas sp. P14]	0	FALSE	54.388	40	13	13	48	13	450	48.2	6.54	144.1	13	0	1.333	1.195	0.916	0.45545	0.990692	0.94892	38.92	24.88	21.05	110.3	89.7	100				3.07472e+06	2.50073e+06	2.78659e+06	High	High	High	1
FALSE	High	Master Protein	P14_v1_410008	ID:109592524 yngI| putative acyl-CoA synthetase YngI [Pseudomonas sp. P14]	0	FALSE	54.386	32	13	14	31	10	560	61.4	5.81	91.24	13	0	1.165	0.334	0.304	0.928555	0.0494786	0.0806946	19.3	29.93	45.87	55.2	52.9	191.8				432599	414478	1.50221e+06	High	High	High	1
FALSE	High	Master Protein	P14_v1_1180003	ID:109594481 purK| N5-carboxyaminoimidazole ribonucleotide synthase [Pseudomonas sp. P14]	0	FALSE	54.341	42	12	12	69	12	360	38.7	5.64	178.18	12	0	0.901	0.942	0.979	0.979569	0.901804	0.93939	19.83	28.26	38.99	91.7	102	106.3				8.05086e+06	8.95064e+06	9.33029e+06	High	High	High	1
FALSE	High	Master Protein	P14_v1_460025	ID:109592728 hpf| ribosome hibernation-promoting factor [Pseudomonas sp. P14]	0	FALSE	54.283	79	6	17	169	6	102	11.5	6.95	488.15	6	0	0.749	2.067	2.762	0.842437	0.649375	0.578449	28.05	36.06	58.97	112.3	137	50.7				9.58902e+07	1.17031e+08	4.32872e+07	High	High	High	1
FALSE	High	Master Protein	P14_v1_240074	ID:109591758 rplD| 50S ribosomal subunit protein L4 [Pseudomonas sp. P14]	0	FALSE	54.237	57	11	14	294	11	200	21.8	9.73	1009.03	11	0	0.725	1.316	1.514	0.767819	0.996599	0.986222	10.19	27.12	41.61	103	130.8	66.2				8.66862e+07	1.10139e+08	5.57642e+07	High	High	High	1
FALSE	High	Master Protein	P14_v1_460013	ID:109592716 nit| Deaminated glutathione amidase [Pseudomonas sp. P14]	0	FALSE	54.186	75	13	13	36	13	283	30.4	6.46	114.18	13	0	1.1	1.348	1.103	0.951676	0.948129	0.996417	9.72	48.24	50.21	108.8	97.2	94				1.85615e+06	1.65804e+06	1.60348e+06	High	High	High	1
FALSE	High	Master Protein	P14_v1_940021	ID:109594128 membrane fusion protein, multidrug efflux system [Pseudomonas sp. P14]	0	FALSE	54.121	40	13	15	37	13	366	39.4	8.13	95.39	13	0	0.249	1.279	5.069	3.28793e-12	0.956391	0.0263768	12.35	6.93	26.89	37.4	226.3	36.4				906506	5.49126e+06	882455	High	High	High	1
FALSE	High	Master Protein	P14_v1_430007	ID:109592594 3-oxoacyl-[acyl-carrier-protein] synthase III [Pseudomonas sp. P14]	0	FALSE	54.096	39	12	13	71	12	309	33.2	5.19	227.27	12	0	0.925	1.05	1.154	0.984666	0.964781	0.989817	17.04	40.78	36.76	105.5	110.1	84.5				7.68887e+06	8.02358e+06	6.15843e+06	High	High	High	1
FALSE	High	Master Protein	P14_v1_370017	ID:109592372 rplM| 50S ribosomal subunit protein L13 [Pseudomonas sp. P14]	0	FALSE	54.056	68	10	13	171	10	142	15.9	9.7	459.88	10	0	0.803	1.475	1.639	0.924659	0.969306	0.970101	17.03	25.19	35.18	106.5	134.5	59				2.27544e+08	2.87494e+08	1.26117e+08	High	High	High	1
FALSE	High	Master Protein	P14_v1_520018	ID:109592939 TetR family transcriptional regulator [Pseudomonas sp. P14]	0	FALSE	54.043	56	12	13	42	11	227	26.1	6.54	131.76	12	1	1.455	1.73	1.259	0.189045	0.787916	0.986222	21.26	29.63	23.14	129.8	96.9	73.3				5.2143e+06	3.89407e+06	2.94273e+06	High	High	High	1	Met-loss [N-Term]
FALSE	High	Master Protein	P14_v1_1060008	ID:109594331 two-component system, HptB-dependent secretion and biofilm response regulator [Pseudomonas sp. P14]	0	FALSE	54.04	31	15	15	50	15	563	62	5.76	122.48	15	0	0.875	1.432	1.596	0.937737	0.916431	0.911804	9.79	33.89	33.04	94	137.1	68.9				2.97718e+06	4.34113e+06	2.18006e+06	High	High	High	1
FALSE	High	Master Protein	P14_v1_190028	ID:109591405 hemE| uroporphyrinogen decarboxylase [Pseudomonas sp. P14]	0	FALSE	54.037	35	10	10	95	10	354	38.8	6.74	274.23	10	0	0.966	1.999	2.228	0.994001	0.709924	0.693032	8.36	12.44	18.43	114.8	127.5	57.7				8.0633e+06	8.95478e+06	4.05038e+06	High	High	High	1
FALSE	High	Master Protein	P14_v1_130003	ID:109590948 lpxD| UDP-3-O-(3-hydroxymyristoyl)glucosamine N-acyltransferase [Pseudomonas sp. P14]	0	FALSE	54.015	38	11	14	47	11	351	36.5	6.44	142.82	11	0	0.934	0.855	0.943	0.984666	0.867886	0.944122	19.77	34.16	46.92	96.6	101.7	101.7				4.5652e+06	4.80463e+06	4.80228e+06	High	High	High	1	Met-loss [N-Term]
FALSE	High	Master Protein	P14_v1_20177	ID:109589570 motB| motility protein B [Pseudomonas sp. P14]	0	FALSE	53.93	41	14	15	50	14	346	37.8	5.2	117.98	14	0	0.919	0.811	0.736	0.973118	0.875309	0.835567	10.74	39.84	41.03	88.2	98.6	113.2				3.44319e+06	3.84639e+06	4.41645e+06	High	High	High	1
FALSE	High	Master Protein	P14_v1_960004	ID:109594157 membrane fusion protein, multidrug efflux system [Pseudomonas sp. P14]	0	FALSE	53.836	41	12	12	45	12	355	38	5.85	126.52	12	0	1.232	1.048	0.78	0.736642	0.975244	0.852083	17.31	23.67	25.9	113.5	94.7	91.8				6.0122e+06	5.0177e+06	4.86134e+06	High	High	High	1
FALSE	High	Master Protein	P14_v1_60046	ID:109590240 tpiA| triose-phosphate isomerase [Pseudomonas sp. P14]	0	FALSE	53.835	55	13	14	33	13	259	28	5.14	103.89	13	0	100	0.02	0.01	1.64131e-16	1.38203e-16	1.15948e-16		0		1.2		298.8				89252		2.24863e+07	High	Peak Found	High	1
FALSE	High	Master Protein	P14_v1_80100	ID:109590563 astD| aldehyde dehydrogenase [Pseudomonas sp. P14]	0	FALSE	53.739	32	11	12	44	11	487	51.2	5.85	132.68	11	0	0.865	1.852	1.837	0.92833	0.703341	0.832657	26.78	17.57	24.56	109	127.6	63.3				4.5008e+06	5.26711e+06	2.61466e+06	High	High	High	1
FALSE	High	Master Protein	P14_v1_20140	ID:109589533 livG| branched chain amino acid/phenylalanine ABC transporter ATP binding subunit LivG [Pseudomonas sp. P14]	0	FALSE	53.576	46	10	11	47	10	291	32.4	6.62	143.69	10	0	0.877	0.223	0.243	0.936639	0.000586862	0.01334	10.42	19.5	21.74	54.8	68	177.2				2.52568e+06	3.13472e+06	8.17243e+06	High	High	High	1	Met-loss [N-Term]
FALSE	High	Master Protein	P14_v1_580022	ID:109593143 Aminotransferase [Pseudomonas sp. P14]	0	FALSE	53.563	46	13	13	43	13	424	47.7	7.74	97.71	13	0	1.08	0.82	0.762	0.976239	0.931087	0.914402	19.4	38.68	55.61	96.9	91	112				931546	874843	1.07657e+06	High	High	High	1
FALSE	High	Master Protein	P14_v1_170044	ID:109591285 Gamma-aminobutyric acid-binding protein [Pseudomonas sp. P14]	0	FALSE	53.483	32	11	12	92	11	344	37.9	5.54	227.09	11	0	0.966	0.586	0.602	0.984666	0.204302	0.372069	10.89	16.77	19.87	77.5	82.6	139.9				2.15502e+07	2.2966e+07	3.88787e+07	High	High	High	1
FALSE	High	Master Protein	P14_v1_420037	ID:109592587 fpr| Flavodoxin/ferredoxin--NADP reductase [Pseudomonas sp. P14]	0	FALSE	53.45	48	12	12	41	12	258	28.9	5.54	110.49	12	0	1.023	0.814	0.797	0.980729	0.831767	0.878896	27.77	30.09	15.57	85.9	98.4	115.7				3.76363e+06	4.30979e+06	5.06804e+06	High	High	High	1
FALSE	High	Master Protein	P14_v1_60051	ID:109590245 gph| phosphoglycolate phosphatase [Pseudomonas sp. P14]	0	FALSE	53.389	58	12	12	43	12	235	25.2	5.03	125.95	12	0	0.446	0.01	0.01	0.0451383	1.38203e-16	1.15948e-16	0	0	0	0.2	0.4	299.5				7524.42	16859.4	1.41729e+07	High	High	High	1
FALSE	High	Master Protein	P14_v1_10108	ID:109589124 universal stress protein E [Pseudomonas sp. P14]	0	FALSE	53.341	47	12	14	56	12	308	34.8	6.3	138.24	12	0	1.55	67	36.975	0.140109	1.38203e-16	5.47432e-11	19.96	91.52	67.98	180.8	118	1.2				1.48602e+07	9.69506e+06	97394.9	High	High	High	1
FALSE	High	Master Protein	P14_v1_850026	ID:109593909 putative spermidine/putrescine transport system substrate-binding protein [Pseudomonas sp. P14]	0	FALSE	53.225	38	11	12	82	11	341	37.1	5.63	215.34	11	0	1.245	0.563	0.517	0.66474	0.194894	0.39234	6.69	25.33	15.64	82.9	69.2	147.9				6.9076e+06	5.76201e+06	1.23178e+07	High	High	High	1
FALSE	High	Master Protein	P14_v1_110027	ID:109590794 bamD| Outer membrane protein assembly factor BamD [Pseudomonas sp. P14]	0	FALSE	53.206	36	10	12	56	10	339	38.4	5.19	173.94	10	0	1.58	1.012	0.664	0.0842073	0.962626	0.729853	21.43	27.41	45.47	108.5	83.1	108.4				4.78223e+06	3.662e+06	4.77853e+06	High	High	High	1
FALSE	High	Master Protein	P14_v1_40044	ID:109589886 histidine kinase [Pseudomonas sp. P14]	0	FALSE	53.153	28	13	13	39	13	604	67.6	6.19	99.82	13	0	1.142	1.474	1.263	0.92833	0.875309	0.944637	20.63	32.39	32.26	118	105.7	76.3				1.7444e+06	1.56233e+06	1.12873e+06	High	High	High	1
FALSE	High	Master Protein	P14_v1_540023	ID:109593018 glgA| Glycogen synthase [Pseudomonas sp. P14]	0	FALSE	53.043	36	12	13	30	12	519	57.1	5.94	75.92	12	0	2.519	0.671	0.199	0.00216836	0.771693	0.0322154	24.05	41.9	76.74	109.2	25.6	165.2				786147	184353	1.18934e+06	High	High	High	1
FALSE	High	Master Protein	P14_v1_840001	ID:109593863 srkA| Stress response kinase A [Pseudomonas sp. P14]	0	FALSE	52.938	51	13	13	50	13	324	37	5.63	140.14	13	0	1.177	0.922	0.967	0.902239	0.967567	0.976549	29.48	26.5	11.28	94	88.3	117.7				1.23578e+06	1.16148e+06	1.54812e+06	High	High	High	1	Met-loss [N-Term]
FALSE	High	Master Protein	P14_v1_1030008	ID:109594281 yfcH| putative NAD-dependent epimerase YfcH [Pseudomonas sp. P14]	0	FALSE	52.914	63	14	14	49	14	301	33.1	9.35	137.49	14	0	0.918	0.676	0.756	0.979569	0.588647	0.816753	21.83	36.2	38.94	95.9	124.9	79.2				5.89453e+06	7.67723e+06	4.8652e+06	High	High	High	1
FALSE	High	Master Protein	P14_v1_600027	ID:109593206 GntR family transcriptional regulator [Pseudomonas sp. P14]	0	FALSE	52.9	59	9	11	41	9	251	27.9	6.92	140.06	9	0	0.816	0.917	1.297	0.866048	0.937646	0.976549	7.45	37.17	33.22	87	120.9	92				3.25616e+06	4.5245e+06	3.44376e+06	High	High	High	1
FALSE	High	Master Protein	P14_v1_480003	ID:109592784 glcA| glycolate/lactate:H(+) symporter GlcA [Pseudomonas sp. P14]	0	FALSE	52.776	21	8	11	100	8	556	58.9	8.94	306.77	8	0	1.459	0.428	0.366	0.246945	0.0278169	0.042664	24.76	21.99	34.39	90.2	58	151.8				4.08664e+07	2.62917e+07	6.8803e+07	High	High	High	1
FALSE	High	Master Protein	P14_v1_430011	ID:109592598 flgI| flagellar P-ring protein [Pseudomonas sp. P14]	0	FALSE	52.764	45	13	14	31	13	369	38.2	8.1	92.79	13	0	1.409	0.754	0.564	0.353783	0.771577	0.576693	23.15	16.89	37.35	88.3	78.4	133.3				2.30549e+06	2.04741e+06	3.48182e+06	High	High	High	1
FALSE	High	Master Protein	P14_v1_370012	ID:109592367 trpS| Tryptophan--tRNA ligase [Pseudomonas sp. P14]	0	FALSE	52.718	42	14	14	56	14	449	49.3	5.69	164.27	14	0	0.834	1.469	2.054	0.90648	0.956391	0.760474	14.01	43.15	46.65	100.5	136.2	63.4				6.65642e+06	9.01961e+06	4.19743e+06	High	High	High	1
FALSE	High	Master Protein	P14_v1_870010	ID:109593944 Uncharacterized signaling protein PA3311 [Pseudomonas sp. P14]	0	FALSE	52.671	20	13	13	40	13	754	82.7	6.84	110.31	13	0	1.077	1.056	1.083	0.962994	0.996599	0.999864	26.83	22.41	33.23	104.1	96.6	99.4				1.85628e+06	1.723e+06	1.77242e+06	High	High	High	1
FALSE	High	Master Protein	P14_v1_20227	ID:109589620 TldD/PmbA family protein [Pseudomonas sp. P14]	0	FALSE	52.658	34	10	10	32	10	439	47.8	5.2	102.29	10	0	0.864	0.928	1.063	0.926373	0.964781	0.995257	8.72	27.4	35.63	89.4	102.4	108.2				1.74572e+06	1.99885e+06	2.11126e+06	High	High	High	1
FALSE	High	Master Protein	P14_v1_10256	ID:109589272 VirK [Pseudomonas sp. P14]	0	FALSE	52.623	41	13	14	44	13	334	37.1	8.13	123.12	13	0	1.209	1.017	0.896	0.767819	0.976559	0.935011	25.51	17.36	18.13	105.1	95.1	99.8				3.10003e+06	2.80608e+06	2.94454e+06	High	High	High	1
FALSE	High	Master Protein	P14_v1_20229	ID:109589622 dbpA| ATP-dependent RNA helicase DbpA [Pseudomonas sp. P14]	0	FALSE	52.382	41	14	14	51	14	461	49.6	8.65	147.26	14	0	1.017	0.827	0.868	0.958614	0.714788	0.781729	20.78	20.45	23.03	97.8	168.1	34.1				2.4405e+07	4.1949e+07	8.51721e+06	High	High	High	1
FALSE	High	Master Protein	P14_v1_270004	ID:109591871 PQQ-dependent catabolism-associated beta-propeller protein [Pseudomonas sp. P14]	0	FALSE	52.329	49	10	13	27	10	329	36	6.25	84.16	10	0	4.393	0.151	0.053	3.32984e-09	2.78411e-06	8.62407e-09	292.22	67.21	1281.16	30.3	9.8	259.9				909917	293634	7.80741e+06	High	Peak Found	High	1
FALSE	High	Master Protein	P14_v1_240070	ID:109591754 rplV| 50S ribosomal subunit protein L22 [Pseudomonas sp. P14]	0	FALSE	52.322	55	8	11	242	7	110	11.9	10.11	844.99	8	0	0.799	2.147	3	0.919958	0.585191	0.478793	31.75	43.08	74.23	110.4	138.2	51.4				1.0724e+08	1.34263e+08	4.99068e+07	High	High	High	1
FALSE	High	Master Protein	P14_v1_20058	ID:109589451 ybeX| CorC-HlyC family protein YbeX [Pseudomonas sp. P14]	0	FALSE	52.263	43	12	12	49	12	279	31.4	5.07	144.54	12	0	0.943	1.233	1.366	0.984666	0.996599	0.976549	7.23	32.77	36.26	103.2	113.4	83.4				5.91838e+06	6.49804e+06	4.78089e+06	High	High	High	1
FALSE	High	Master Protein	P14_v1_960013	ID:109594166 plpB| Outer membrane lipoprotein 2 [Pseudomonas sp. P14]	0	FALSE	52.183	62	12	12	60	12	261	28.2	7.46	194.07	12	0	0.385	2.258	6.11	0.000795151	0.472384	0.0171661	14.96	50	51.53	77.1	193.6	29.3				7.2994e+06	1.83234e+07	2.77763e+06	High	High	High	1
FALSE	High	Master Protein	P14_v1_20165	ID:109589558 hfq| RNA-binding protein Hfq [Pseudomonas sp. P14]	0	FALSE	52.132	94	8	12	177	8	86	9.5	8.5	508.91	8	0	1.137	1.335	1.177	0.868379	0.990692	0.959397	18.15	23.49	42.21	112.3	104.2	83.5				1.14699e+08	1.06417e+08	8.52537e+07	High	High	High	1
FALSE	High	Master Protein	P14_v1_150033	ID:109591143 tam| Trans-aconitate 2-methyltransferase [Pseudomonas sp. P14]	0	FALSE	52.104	62	11	15	45	11	258	29.1	6.23	125.95	11	0	1.034	1.34	1.288	0.984666	0.948129	0.959397	12.25	7.98	16.27	112.9	100.2	87				2.06786e+06	1.83487e+06	1.59293e+06	High	High	High	1
FALSE	High	Master Protein	P14_v1_420002	ID:109592552 recC| exodeoxyribonuclease V subunit RecC [Pseudomonas sp. P14]	0	FALSE	52.067	16	17	18	41	17	1160	130.4	5.57	85.35	17	0	1.131	0.923	0.962	0.904505	0.960887	0.962298	21.87	26.24	25.26	89.2	109.1	101.7				2.26249e+06	2.7652e+06	2.57796e+06	High	High	High	1
FALSE	High	Master Protein	P14_v1_130055	ID:109591000 cysM| cysteine synthase B [Pseudomonas sp. P14]	0	FALSE	51.888	36	11	11	46	11	312	33.7	5.58	121.9	11	0	0.899	1.51	1.466	0.962994	0.948129	0.959397	30.79	22.84	41.44	108.2	120.2	71.6				7.15912e+06	7.95685e+06	4.74281e+06	High	High	High	1
FALSE	High	Master Protein	P14_v1_580028	ID:109593149 protein of unknown function [Pseudomonas sp. P14]	0	FALSE	51.861	10	14	14	20	13	1508	167.1	5.31	47.78	14	0	2.458	0.211	0.1	0.00588635	0.00203317	0.000294707	0	27.74	0	42.6	2	255.4				228521	10732.8	1.37122e+06	High	High	High	1
FALSE	High	Master Protein	P14_v1_50083	ID:109590110 two-component system, sensor histidine kinase [Pseudomonas sp. P14]	0	FALSE	51.78	30	13	13	33	13	556	61.3	6.33	103.39	13	0	1.723	0.237	0.12	0.134733	0.000630294	0.00011425	52.21	38.36	59.64	47.9	39.7	212.4				971155	805744	4.3104e+06	High	High	High	1
FALSE	High	Master Protein	P14_v1_930010	ID:109594096 nuoI| NADH:quinone oxidoreductase subunit I [Pseudomonas sp. P14]	0	FALSE	51.769	66	13	14	84	13	182	20.5	6.19	187.09	13	0	1.053	2.225	2.102	0.950677	0.487219	0.756853	8.07	48.99	55.93	125.9	118.3	55.8				1.11407e+07	1.04669e+07	4.9329e+06	High	High	High	1
FALSE	High	Master Protein	P14_v1_1200002	ID:109594505 kdsD| D-arabinose 5-phosphate isomerase KdsD [Pseudomonas sp. P14]	0	FALSE	51.751	37	11	15	84	11	310	33.2	5.94	201.47	11	0	0.806	4.93	5.265	0.92833	0.00340989	0.0507283	23	18.71	47.91	130.2	139.5	30.3				4.50159e+07	4.82515e+07	1.04685e+07	High	High	High	1
FALSE	High	Master Protein	P14_v1_410015	ID:109592531 Helix-turn-helix transcriptional regulator [Pseudomonas sp. P14]	0	FALSE	51.69	66	9	10	45	9	225	24.6	5.68	158.95	9	0	0.92	0.738	0.763	0.973118	0.766472	0.855376	15.67	18.13	33.69	90.8	91.7	117.5				3.51305e+06	3.54517e+06	4.54485e+06	High	High	High	1	Met-loss [N-Term]
FALSE	High	Master Protein	P14_v1_90057	ID:109590626 gamma-carbonic anhydrase [Pseudomonas sp. P14]	0	FALSE	51.572	61	7	12	47	7	174	18.5	6.52	163.23	7	0	0.875	0.845	0.896	0.939049	0.834931	0.93347	7.87	18.51	33.52	86.7	100.4	112.8				5.32057e+06	6.16315e+06	6.92443e+06	High	High	High	1
FALSE	High	Master Protein	P14_v1_850005	ID:109593888 circadian clock protein KaiC [Pseudomonas sp. P14]	0	FALSE	51.466	43	14	14	46	14	481	51.2	6.48	127.73	14	0	1.23	0.715	0.593	0.874695	0.78921	0.595593	17.62	28.77	42.99	94.8	75.4	129.7				1.52538e+06	1.21316e+06	2.08659e+06	High	High	High	1
FALSE	High	Master Protein	P14_v1_380027	ID:109592426 outer membrane protein, adhesin transport system [Pseudomonas sp. P14]	0	FALSE	51.37	32	12	13	34	12	478	51.8	6.02	96.64	12	0	1.106	2.638	2.245	0.954702	0.191124	0.49096	15.72	18.5	42.51	119.2	124.7	56.1				1.22414e+06	1.28032e+06	575910	High	High	High	1
FALSE	High	Master Protein	P14_v1_550026	ID:109593048 gpsA| Glycerol-3-phosphate dehydrogenase [NAD(P)+] [Pseudomonas sp. P14]	0	FALSE	51.364	40	10	11	70	10	341	36.5	6.65	200.41	10	0	0.945	1.24	1.29	0.986344	0.996599	0.988818	7.44	43.94	29.72	102.8	108.7	88.5				7.45886e+06	7.89077e+06	6.42614e+06	High	High	High	1
FALSE	High	Master Protein	P14_v1_20107	ID:109589500 SPFH/Band 7/PHB domain protein [Pseudomonas sp. P14]	0	FALSE	51.352	42	8	10	56	8	284	30.9	5.31	164.72	8	0	0.919	2.133	2.31	0.973118	0.455044	0.591277	15.11	23.59	8.74	119.7	127.7	52.5				3.61744e+06	3.8595e+06	1.58784e+06	High	High	High	1
FALSE	High	Master Protein	P14_v1_20192	ID:109589585 nudF| ADP-sugar pyrophosphatase [Pseudomonas sp. P14]	0	FALSE	51.337	73	12	12	68	12	205	23.1	4.93	190.2	12	0	0.798	1.322	1.842	0.841179	0.989781	0.855376	12.44	57.31	59.74	98.7	119.4	81.9				6.34572e+06	7.67279e+06	5.26145e+06	High	High	High	1	Met-loss [N-Term]
FALSE	High	Master Protein	P14_v1_50027	ID:109590054 Uncharacterized short-chain type dehydrogenase/reductase y4eL [Pseudomonas sp. P14]	0	FALSE	51.224	51	11	12	48	11	249	26.2	6.54	142.77	11	0	0.75	1.94	2.68	0.635589	0.609455	0.403838	11.41	29.83	30.85	103.8	141.3	54.8				4.76819e+06	6.49033e+06	2.51888e+06	High	High	High	1
FALSE	High	Master Protein	P14_v1_300018	ID:109592044 fleN| Antiactivator FleN [Pseudomonas sp. P14]	0	FALSE	51.209	40	12	13	66	12	277	29.7	7.83	147.32	12	0	0.936	0.867	0.852	0.984666	0.855952	0.904311	15.09	68.44	51.2	92.8	98.7	108.4				5.8771e+06	6.24985e+06	6.8621e+06	High	High	High	1	Met-loss [N-Term]
FALSE	High	Master Protein	P14_v1_60090	ID:109590284 beta-hydroxylase [Pseudomonas sp. P14]	0	FALSE	51.172	45	10	11	54	10	299	34.6	9.51	145.97	10	0	1.154	1.265	1.198	0.891177	0.966275	0.977897	15.74	38.5	40.45	115.9	101.9	82.1				2.5025e+06	2.19992e+06	1.77241e+06	High	High	High	1
FALSE	High	Master Protein	P14_v1_190021	ID:109591398 mscK| Mechanosensitive channel MscK [Pseudomonas sp. P14]	0	FALSE	51.147	16	14	14	31	14	1102	122.3	8.62	76.85	14	0	0.911	1.279	1.27	0.954962	0.964781	0.970122	25.59	17.7	7.76	115.5	136	48.5				754891	888862	316940	High	High	High	1
FALSE	High	Master Protein	P14_v1_920014	ID:109594073 Solute-binding protein Bpro_3107 [Pseudomonas sp. P14]	0	FALSE	51.121	39	9	10	33	9	323	35.6	6.33	116.7	9	0	0.521	0.623	1.134	0.0118908	0.581124	0.999864	19.4	16.66	16.42	62.2	137.9	99.9				1.38314e+06	3.06976e+06	2.22314e+06	High	High	High	1
FALSE	High	Master Protein	P14_v1_450025	ID:109592691 pepP| Xaa-Pro aminopeptidase [Pseudomonas sp. P14]	0	FALSE	51.105	29	10	12	58	10	444	49.1	5.91	160.07	10	0	1.012	0.948	0.929	0.984666	0.941308	0.935011	15.01	15.29	13.33	96.4	94.9	108.6				4.68697e+06	4.61452e+06	5.27904e+06	High	High	High	1
FALSE	High	Master Protein	P14_v1_370024	ID:109592379 hyperosmotically inducible periplasmic protein [Pseudomonas sp. P14]	0	FALSE	51.049	54	9	14	80	9	192	20.6	9.06	241.89	9	0	1.042	0.944	1.05	0.962994	0.927459	0.972265	18.08	23.49	41.19	98.4	106.1	95.5				5.94175e+06	6.40813e+06	5.7701e+06	High	High	High	1
FALSE	High	Master Protein	P14_v1_270008	ID:109591875 agmR| Glycerol metabolism activator [Pseudomonas sp. P14]	0	FALSE	51.016	52	9	11	44	9	221	24.5	6	137.38	9	0	1.875	0.062	0.031	0.0629276	1.69617e-13	2.58103e-12	20.43	53.46	30.43	16.3	7.5	276.1				792720	365820	1.34071e+07	High	High	High	1
FALSE	High	Master Protein	P14_v1_20094	ID:109589487 two-component system, sensor histidine kinase RetS [Pseudomonas sp. P14]	0	FALSE	51.015	20	12	12	28	12	923	101.5	6.65	86.05	12	0	1.46	0.468	0.347	0.536184	0.22461	0.0910498	14.92	36.39	27.22	89	46.2	164.8				929279	482788	1.72145e+06	High	High	High	1
FALSE	High	Master Protein	P14_v1_130069	ID:109591014 hda| inibitor of reinitiation of DNA replication [Pseudomonas sp. P14]	0	FALSE	50.922	54	10	11	35	10	235	26.6	8.44	101.07	10	0	0.989	1.015	0.933	0.994001	0.990397	0.971401	31.42	29.45	33.24	113.3	108.6	78.2				1.64516e+06	1.57709e+06	1.13568e+06	High	High	High	1
FALSE	High	Master Protein	P14_v1_280022	ID:109591939 tauA| taurine ABC transporter periplasmic binding protein [Pseudomonas sp. P14]	0	FALSE	50.903	39	12	12	55	12	323	34.3	7.52	170.34	12	0	0.511	0.487	0.986	0.0264461	0.0931317	0.922898	5.1	18.45	13.27	61.6	119.6	118.8				5.92288e+06	1.14935e+07	1.14179e+07	High	High	High	1
FALSE	High	Master Protein	P14_v1_450021	ID:109592687 putative binding protein component of ABC iron transporter PA5217 [Pseudomonas sp. P14]	0	FALSE	50.837	43	13	13	82	13	333	36.8	5.92	203.99	13	0	0.936	0.813	0.846	0.999405	0.706879	0.816523	24.85	50.32	29.13	91	100.1	108.9				1.08398e+07	1.19235e+07	1.29713e+07	High	High	High	1
FALSE	High	Master Protein	P14_v1_170058	ID:109591299 coq| 3-demethoxyubiquinol 3-hydroxylase [Pseudomonas sp. P14]	0	FALSE	50.808	68	10	12	52	10	215	24	6.16	158.73	10	0	0.606	2.128	3.968	0.0893125	0.422036	0.110562	21.86	44.94	48.09	94.4	161.6	44				3.22658e+06	5.52125e+06	1.502e+06	High	High	High	1
FALSE	High	Master Protein	P14_v1_10276	ID:109589292 yeaE| methylglyoxal reductase YeaE [Pseudomonas sp. P14]	0	FALSE	50.786	67	14	15	43	14	273	30	6.43	107.6	14	0	1.09	0.93	0.842	0.957703	0.968756	0.926846	27.37	52.24	53.51	93.8	97.5	108.8				1.63017e+06	1.69453e+06	1.89159e+06	High	High	High	1
FALSE	High	Master Protein	P14_v1_820009	ID:109593809 NYN domain-containing protein [Pseudomonas sp. P14]	0	FALSE	50.755	51	6	12	229	6	192	21.2	6.2	713.02	6	0	1.129	1.182	1.046	0.880241	0.987039	0.918725	18.22	10.92	20.28	110.2	95.6	94.2				5.48152e+07	4.75268e+07	4.68248e+07	High	High	High	1	Met-loss [N-Term]
FALSE	High	Master Protein	P14_v1_320038	ID:109592174 ndk| nucleoside diphosphate kinase [Pseudomonas sp. P14]	0	FALSE	50.747	50	7	9	211	7	141	15	5.57	645.96	7	0	0.924	2.132	2.216	0.994001	0.594956	0.817738	22.91	37.73	76.73	114	131.9	54.1				2.33113e+08	2.69674e+08	1.10643e+08	High	High	High	1
FALSE	High	Master Protein	P14_v1_50085	ID:109590112 dsdA| D-serine ammonia-lyase [Pseudomonas sp. P14]	0	FALSE	50.679	32	9	11	22	9	449	47.9	5.87	75.89	9	0	1.15	0.509	0.444	0.92833	0.317926	0.230948	8.86	11.83	19.71	73.2	65.3	161.6				1.03398e+06	922161	2.28336e+06	High	High	High	1
FALSE	High	Master Protein	P14_v1_780003	ID:109593714 protein of unknown function [Pseudomonas sp. P14]	0	FALSE	50.635	55	8	11	75	8	164	19.1	5.3	220.91	8	0	0.8	1.401	2.089	0.825999	0.948129	0.712021	31.84	65.61	51.92	108	127.4	64.6				3.98197e+06	4.69504e+06	2.37932e+06	High	High	High	1
FALSE	High	Master Protein	P14_v1_170051	ID:109591292 pabA| aminodeoxychorismate synthase subunit 2 [Pseudomonas sp. P14]	0	FALSE	50.631	70	8	10	42	8	197	21.7	6.25	152.2	8	0	1.017	0.789	0.983	0.984345	0.847948	0.966554	20.92	8.86	52.09	123.1	94.2	82.7				4.73919e+06	3.62397e+06	3.18296e+06	High	High	High	1
FALSE	High	Master Protein	P14_v1_380006	ID:109592405 nadC| quinolinate phosphoribosyltransferase (decarboxylating) [Pseudomonas sp. P14]	0	FALSE	50.568	59	12	13	56	12	282	30.2	5.54	159.31	12	0	1.106	1.209	1.193	0.919958	0.999657	0.996963	19.69	24.49	35.73	108	110.9	81.1				6.64919e+06	6.82762e+06	4.99442e+06	High	High	High	1
FALSE	High	Master Protein	P14_v1_810006	ID:109593789 ppnP| nucleoside phosphorylase PpnP [Pseudomonas sp. P14]	0	FALSE	50.539	94	7	10	122	7	94	10.3	4.75	411.79	7	0	1.056	1.074	1.174	0.939049	0.951383	0.959397	19.46	27.8	11.84	111.1	106.9	81.9				2.85515e+07	2.74709e+07	2.10425e+07	High	High	High	1
FALSE	High	Master Protein	P14_v1_220021	ID:109591585 4-amino-4-deoxychorismate lyase [Pseudomonas sp. P14]	0	FALSE	50.53	55	14	14	33	14	271	29.4	6.86	88.01	14	0	0.928	0.415	0.387	0.969667	0.126162	0.10143	26.09	27.99	43.83	52	66.4	181.6				574888	733376	2.00685e+06	High	High	High	1
FALSE	High	Master Protein	P14_v1_50033	ID:109590060 FAD-dependent oxidoreductase domain-containing protein 1 [Pseudomonas sp. P14]	0	FALSE	50.498	33	9	10	30	9	398	44.2	5.2	86.83	9	0	0.608	1.799	2.531	0.156655	0.763365	0.456671	14.38	8.3	24.01	101.3	170.9	27.8				819613	1.38359e+06	225133	High	High	High	1
FALSE	High	Master Protein	P14_v1_40153	ID:109589995 clpV| AAA+ ATPase ClpV1 [Pseudomonas sp. P14]	0	FALSE	50.486	17	13	13	39	10	865	94.7	5.9	90.65	13	0	1.934	1.202	0.625	0.0465895	0.976459	0.853089	25.01	33.49	38.66	140.2	64.8	95				1.073e+06	495816	727319	High	High	High	1
FALSE	High	Master Protein	P14_v1_20176	ID:109589569 rsgA| ribosome small subunit-dependent GTPase A [Pseudomonas sp. P14]	0	FALSE	50.469	47	10	13	37	10	343	37.7	6.52	96.16	10	0	0.936	0.818	0.822	0.976239	0.905442	0.922898	50.48	59.4	46.43	92.5	101.1	106.5				1.47423e+06	1.6112e+06	1.6975e+06	High	High	High	1
FALSE	High	Master Protein	P14_v1_50156	ID:109590183 spermidine synthase [Pseudomonas sp. P14]	0	FALSE	50.438	16	11	12	30	11	843	89.8	9.63	83.75	11	0	1.405	1.26	0.966	0.437868	0.964781	0.976549	14.68	39.56	37.21	126.6	85.3	88.1				2.44339e+06	1.6474e+06	1.70094e+06	High	High	High	1
FALSE	High	Master Protein	P14_v1_140059	ID:109591096 N-acetyltransferase [Pseudomonas sp. P14]	0	FALSE	50.373	75	11	11	158	11	152	17.8	7.43	237.28	11	0	1.576	1.102	0.647	0.122004	0.963276	0.523808	18.69	13.44	57.47	107.9	78.6	113.5				1.34705e+07	9.80686e+06	1.41615e+07	High	High	High	1
FALSE	High	Master Protein	P14_v1_620024	ID:109593269 hyi| hydroxypyruvate isomerase [Pseudomonas sp. P14]	0	FALSE	50.339	60	11	14	36	11	260	29	5.35	111.76	11	0	1.037	0.913	0.812	0.974188	0.941308	0.896324	12.85	23.7	8.79	101.7	98.4	100				3.5181e+06	3.40345e+06	3.45922e+06	High	High	High	1
FALSE	High	Master Protein	P14_v1_240023	ID:109591707 ompW| Outer membrane protein W [Pseudomonas sp. P14]	0	FALSE	50.27	37	8	14	117	8	227	24.2	5.2	395.81	8	0	0.953	63.078	65.969	0.986344	1.38203e-16	6.58623e-14	27.8	163.88	130.61	140.7	157	2.3				9.27607e+07	1.03491e+08	1.51966e+06	High	High	High	1
FALSE	High	Master Protein	P14_v1_880019	ID:109593975 AraC family transcriptional regulator CmrA [Pseudomonas sp. P14]	0	FALSE	50.2	41	12	12	37	11	316	35.4	8.87	99.11	12	1	0.881	1.204	1.411	0.947614	0.989781	0.952713	21.07	40.71	28.64	98.2	122.6	79.2				4.23711e+06	5.28671e+06	3.41625e+06	High	High	High	1
FALSE	High	Master Protein	P14_v1_440032	ID:109592660 ilvH| acetolactate synthase/acetohydroxybutanoate synthase, regulatory subunit [Pseudomonas sp. P14]	0	FALSE	50.195	69	10	10	159	10	163	17.8	6.33	516.59	10	0	1.153	0.733	0.616	0.842693	0.511279	0.397426	17.42	29.24	27.96	92.3	82.1	125.6				2.30463e+07	2.05008e+07	3.13771e+07	High	High	High	1
FALSE	High	Master Protein	P14_v1_940006	ID:109594113 peptidoglycan-associated lipoprotein [Pseudomonas sp. P14]	0	FALSE	50.193	46	12	15	48	12	263	28.9	9.03	135.61	12	0	1.417	1.591	1.242	0.287036	0.918265	0.986275	20.99	10.07	25.9	143.7	75.7	80.6				6.99354e+06	3.68235e+06	3.92513e+06	High	High	High	1
FALSE	High	Master Protein	P14_v1_50161	ID:109590188 universal stress protein E [Pseudomonas sp. P14]	0	FALSE	50.053	51	11	11	42	11	298	32.8	8.02	110.85	11	0	1.52	3.679	2.618	0.121682	0.0278807	0.201381	10.81	0	0	181.9	113	5.1				5.31496e+06	3.30097e+06	149121	High	High	High	1
FALSE	High	Master Protein	P14_v1_180013	ID:109591321 TetR/AcrR family transcriptional regulator [Pseudomonas sp. P14]	0	FALSE	50.051	54	12	12	46	12	235	26.2	9.29	116.52	12	0	0.901	1.216	1.46	0.952888	0.986216	0.940461	11.37	20.18	22.43	105.9	115.9	78.1				2.92469e+06	3.20015e+06	2.15688e+06	High	High	High	1
FALSE	High	Master Protein	P14_v1_60027	ID:109590221 MazG C-terminal domain-containing protein [Pseudomonas sp. P14]	0	FALSE	50.048	36	12	13	43	12	404	45.6	5.97	134.95	12	0	0.912	1.386	1.579	0.958614	0.920286	0.855844	23.94	30.92	10.79	108.5	114.9	76.7				2.19072e+06	2.32024e+06	1.54899e+06	High	High	High	1	Met-loss [N-Term]
FALSE	High	Master Protein	P14_v1_480021	ID:109592802 folP| dihydropteroate synthase [Pseudomonas sp. P14]	0	FALSE	50.02	59	11	13	40	11	283	30.3	5.66	98.47	11	0	0.803	0.781	0.933	0.803738	0.839968	0.950296	27.99	29.21	41.11	92	94.9	113.2				2.39211e+06	2.46675e+06	2.94239e+06	High	High	High	1
FALSE	High	Master Protein	P14_v1_1540001	ID:109594734 Crotonase/enoyl-CoA hydratase family protein [Pseudomonas sp. P14]	0	FALSE	49.968	74	12	13	59	12	229	24.6	7.58	181.02	12	0	1.097	0.995	0.934	0.937737	0.949634	0.93347	12.49	29.92	32.9	107	91.5	101.5				6.11027e+06	5.22225e+06	5.79346e+06	High	High	High	1
FALSE	High	Master Protein	P14_v1_1230006	ID:109594537 M61 glycyl aminopeptidase [Pseudomonas sp. P14]	0	FALSE	49.927	40	14	14	46	14	402	44.6	9.91	105.16	14	0	1.037	1.285	1.179	0.973118	0.962626	0.986222	17.07	32.53	20.28	110.2	111.8	78				2.6297e+06	2.66871e+06	1.86303e+06	High	High	High	1
FALSE	High	Master Protein	P14_v1_180029	ID:109591337 queF| 7-cyano-7-deazaguanine reductase [Pseudomonas sp. P14]	0	FALSE	49.925	44	12	13	47	12	276	30.7	6.52	112.52	12	0	0.989	1.243	1.464	0.993579	0.996485	0.957868	22.59	24.02	55.35	106.2	107.1	86.6				5.67254e+06	5.72082e+06	4.62564e+06	High	High	High	1
FALSE	High	Master Protein	P14_v1_30046	ID:109589678 copB| Copper resistance protein B [Pseudomonas sp. P14]	0	FALSE	49.87	37	10	11	38	10	371	40.5	5.26	110.26	10	0	1.304	0.86	0.727	0.745597	0.941308	0.835567	14.11	31.22	12.98	77.4	92.1	130.5				1.20501e+06	1.43435e+06	2.03254e+06	High	High	High	1
FALSE	High	Master Protein	P14_v1_90102	ID:109590671 two-component system, chemotaxis family, response regulator WspR [Pseudomonas sp. P14]	0	FALSE	49.85	51	12	12	58	12	335	37	5.86	148.04	12	0	1.064	0.82	0.751	0.95737	0.875309	0.868028	7.96	28.42	31.83	95.9	88.3	115.8				2.46136e+06	2.26719e+06	2.97437e+06	High	High	High	1
FALSE	High	Master Protein	P14_v1_620023	ID:109593268 glxR| tartronate semialdehyde reductase 2 [Pseudomonas sp. P14]	0	FALSE	49.829	53	11	11	57	11	297	30.8	6.64	166.21	11	0	1.511	1.137	0.757	0.1331	0.990397	0.855287	10.83	25.21	21.81	116.9	75.7	107.4				4.979e+06	3.22662e+06	4.57713e+06	High	High	High	1
FALSE	High	Master Protein	P14_v1_490014	ID:109592827 pyrE| orotate phosphoribosyltransferase [Pseudomonas sp. P14]	0	FALSE	49.801	66	9	10	28	9	213	23.1	5.25	88.23	9	0	0.846	1.614	2.259	0.897272	0.820629	0.46163	27.77	25.1	10.81	110.1	134.4	55.4				2.182e+06	2.66321e+06	1.09801e+06	High	High	High	1
FALSE	High	Master Protein	P14_v1_460032	ID:109592735 mlaF| intermembrane phospholipid transport system, ATP binding subunit MlaF [Pseudomonas sp. P14]	0	FALSE	49.776	50	10	12	46	10	269	29.1	5.72	120.56	10	0	1.133	1.286	1.102	0.898103	0.964781	0.999864	14.84	25.94	19.42	116.2	98.8	84.9				2.86495e+06	2.43602e+06	2.09305e+06	High	High	High	1
FALSE	High	Master Protein	P14_v1_240053	ID:109591737 rpsM| 30S ribosomal subunit protein S13 [Pseudomonas sp. P14]	0	FALSE	49.741	59	9	11	213	9	118	13.2	10.67	504.91	9	0	0.873	1.485	1.759	0.979569	0.964781	0.944122	22.28	9.94	35.87	104.5	121.3	74.2				1.7607e+08	2.0436e+08	1.2508e+08	High	High	High	1
FALSE	High	Master Protein	P14_v1_30084	ID:109589716 mnmE| 5-carboxymethylaminomethyluridine-tRNA synthase GTPase subunit [Pseudomonas sp. P14]	0	FALSE	49.698	35	13	13	34	13	456	48.9	5.39	91.19	13	0	1.043	1.184	0.998	0.973118	0.996599	0.971401	11.36	35.98	30.08	107	96.2	96.7				3.45987e+06	3.11059e+06	3.1263e+06	High	High	High	1
FALSE	High	Master Protein	P14_v1_790026	ID:109593759 dpkA| Delta(1)-pyrroline-2-carboxylate/Delta(1)-piperideine-2-carboxylate reductase [Pseudomonas sp. P14]	0	FALSE	49.684	40	8	9	25	8	341	36	6.06	88.05	8	0	1.119	0.918	0.812	0.92833	0.948129	0.906027	13.93	18.46	13.19	92.2	77.1	130.6				2.25711e+06	1.88754e+06	3.19555e+06	High	High	High	1
FALSE	High	Master Protein	P14_v1_600025	ID:109593204 guaD| guanine deaminase [Pseudomonas sp. P14]	0	FALSE	49.658	37	12	13	41	12	434	48.1	5.55	110.7	12	0	0.976	1.868	2	0.994001	0.60774	0.58335	10.16	9.73	28.59	121.9	124.6	53.5				2.39638e+06	2.45102e+06	1.05241e+06	High	High	High	1
FALSE	High	Master Protein	P14_v1_150020	ID:109591130 glutathione S-transferase [Pseudomonas sp. P14]	0	FALSE	49.613	41	7	9	46	7	207	23.6	6.54	139.76	7	0	1.021	1.251	1.402	0.984666	0.986216	0.959397	25.19	25.95	18.09	98.2	117.5	84.3				3.41946e+06	4.08851e+06	2.93493e+06	High	High	High	1
FALSE	High	Master Protein	P14_v1_280027	ID:109591944 srpH| Serine acetyltransferase, plasmid [Pseudomonas sp. P14]	0	FALSE	49.528	41	10	11	56	10	310	33.5	6.8	157.98	10	0	1.011	1.196	1.114	0.984666	0.996599	0.986275	25.43	21.93	23.29	117.1	98	84.9				8.42413e+06	7.04774e+06	6.11098e+06	High	High	High	1
FALSE	High	Master Protein	P14_v1_240071	ID:109591755 rpsS| 30S ribosomal subunit protein S19 [Pseudomonas sp. P14]	0	FALSE	49.498	66	8	12	143	8	91	10.3	10.62	435.63	8	0	0.809	1.486	1.883	0.92833	0.964781	0.922898	15.86	31.89	30.76	93.3	118.8	87.9				9.01309e+07	1.14729e+08	8.48507e+07	High	High	High	1
FALSE	High	Master Protein	P14_v1_140018	ID:109591055 Dehydratase [Pseudomonas sp. P14]	0	FALSE	49.495	57	12	12	62	12	285	31.6	7.96	162.9	12	0	0.992	0.5	0.462	0.990517	0.191131	0.327926	17.57	33.83	32.16	80	72.7	147.3				2.85146e+06	2.58974e+06	5.25191e+06	High	High	High	1
FALSE	High	Master Protein	P14_v1_340025	ID:109592258 cysteine synthase [Pseudomonas sp. P14]	0	FALSE	49.485	52	11	12	47	11	300	32.6	7.52	129.04	11	0	0.6	0.383	0.703	0.0758233	0.0550041	0.775827	9.71	24.97	40.75	52.3	94.9	152.8				1.89839e+06	3.44778e+06	5.55299e+06	High	High	High	1
FALSE	High	Master Protein	P14_v1_460007	ID:109592710 rod shape-determining protein MreC [Pseudomonas sp. P14]	0	FALSE	49.478	42	11	11	30	11	333	35.5	7.59	93.67	11	0	0.996	1.087	1.146	0.992214	0.996599	0.993355	13.85	22.43	27.57	118.5	83.4	98.2				2.83613e+06	1.99676e+06	2.35012e+06	High	High	High	1
FALSE	High	Master Protein	P14_v1_10266	ID:109589282 Protein-tyrosine kinase [Pseudomonas sp. P14]	0	FALSE	49.428	62	10	10	37	10	268	29.6	7.09	119.48	10	0	1.275	1.519	1.13	0.579861	0.896191	0.999483	12.05	19.18	18.04	125.4	96	78.7				3.82305e+06	2.92727e+06	2.39892e+06	High	High	High	1
FALSE	High	Master Protein	P14_v1_230053	ID:109591682 multicopper oxidase [Pseudomonas sp. P14]	0	FALSE	49.426	34	11	12	27	11	459	51.3	6.28	77.19	11	0	0.827	0.435	0.434	0.883182	0.189608	0.268686	58.89	35.97	13.94	65	85	150				599607	784523	1.38504e+06	High	High	High	1
FALSE	High	Master Protein	P14_v1_170013	ID:109591254 Hydrolase in pqqF 5'region [Pseudomonas sp. P14]	0	FALSE	49.338	54	10	11	31	10	264	29.3	5.34	84.03	10	0	1.08	0.889	1.003	0.959555	0.948129	0.978717	8.14	32.86	39.91	99.1	99.4	101.5				1.95492e+06	1.95972e+06	2.00058e+06	High	High	High	1
FALSE	High	Master Protein	P14_v1_160068	ID:109591238 two-component system, cell cycle sensor histidine kinase and response regulator CckA [Pseudomonas sp. P14]	0	FALSE	49.308	24	14	15	24	14	727	79.2	5.21	67.62	14	0	1.029	0.645	0.616	0.988238	0.771693	0.83428	39.32	47.36	33.47	85.4	73.1	141.5				536122	458574	888340	High	High	High	1
FALSE	High	Master Protein	P14_v1_100044	ID:109590718 glycine betaine/proline transport system substrate-binding protein [Pseudomonas sp. P14]	0	FALSE	49.251	46	12	12	82	12	315	34.5	7.27	224.43	12	0	1.117	0.605	0.46	0.894017	0.238956	0.133615	13.53	12.96	16.71	77.2	64.3	158.4				1.29072e+07	1.07551e+07	2.64851e+07	High	High	High	1
FALSE	High	Master Protein	P14_v1_30179	ID:109589811 kinB| Alginate biosynthesis sensor protein KinB [Pseudomonas sp. P14]	0	FALSE	49.245	25	10	11	35	10	593	66.1	6.86	96.62	10	0	1.054	0.97	0.997	0.984666	0.989781	0.996417	7.78	35.26	28.78	90.9	99.1	109.9				804587	877192	972443	High	High	High	1
FALSE	High	Master Protein	P14_v1_500010	ID:109592862 elbB| low activity glyoxalase ElbB [Pseudomonas sp. P14]	0	FALSE	49.219	57	10	14	39	10	219	23.2	5.1	104.59	10	0	1.031	1.921	1.733	0.951522	0.743066	0.896324	22.02	27.59	18.59	133.6	122.2	44.2				1.30722e+07	1.19635e+07	4.32417e+06	High	High	High	1
FALSE	High	Master Protein	P14_v1_740006	ID:109593595 cobW| Zinc chaperone CobW [Pseudomonas sp. P14]	0	FALSE	49.167	33	9	10	41	9	355	38.6	4.98	121.92	9	0	0.903	2	2.063	0.961812	0.522621	0.720506	31.56	10.33	36.32	110	135.6	54.5				4.14872e+06	5.11524e+06	2.05486e+06	High	High	High	1
FALSE	High	Master Protein	P14_v1_1000008	ID:109594233 cysH| Adenosine 5'-phosphosulfate reductase [Pseudomonas sp. P14]	0	FALSE	48.959	61	13	13	62	13	244	27.9	6.54	157.75	13	0	0.919	1.435	1.564	0.984666	0.967567	0.944122	14.62	13.8	16.91	110.6	115.7	73.7				1.0382e+07	1.08513e+07	6.91534e+06	High	High	High	1	Met-loss [N-Term]
FALSE	High	Master Protein	P14_v1_640030	ID:109593340 ftsE| cell division protein FtsE [Pseudomonas sp. P14]	0	FALSE	48.891	58	9	10	37	9	223	24.6	10.29	119.53	9	0	0.897	0.741	0.813	0.950677	0.787916	0.899607	12.04	13.82	24.27	92.5	91.4	116.1				2.34349e+06	2.31558e+06	2.94272e+06	High	High	High	1
FALSE	High	Master Protein	P14_v1_570008	ID:109593096 paraquat-inducible protein B [Pseudomonas sp. P14]	0	FALSE	48.857	25	13	13	42	13	546	59.5	6.58	107.88	13	0	1.108	0.906	0.797	0.926321	0.932747	0.896324	11.18	33.01	31.86	109.6	87.4	102.9				3.24521e+06	2.589e+06	3.0477e+06	High	High	High	1
FALSE	High	Master Protein	P14_v1_590007	ID:109593156 pheA| Chorismate mutase / Prephenate dehydratase [Pseudomonas sp. P14]	0	FALSE	48.722	45	13	14	58	13	364	40.5	6.54	158.88	13	0	0.861	1.299	1.509	0.966049	0.999657	0.986222	24.77	13.51	40.46	97.7	127.8	74.5				1.78989e+07	2.34191e+07	1.36451e+07	High	High	High	1
FALSE	High	Master Protein	P14_v1_370014	ID:109592369 zapE| cell division protein ZapE [Pseudomonas sp. P14]	0	FALSE	48.696	43	13	13	46	13	364	42.1	6.67	117.31	13	0	0.995	2.039	2.174	0.989739	0.478361	0.509645	7.33	23.98	23.29	121.5	127.5	51				2.51882e+06	2.64404e+06	1.05851e+06	High	High	High	1
FALSE	High	Master Protein	P14_v1_1050001	ID:109594308 translation elongation factor Tu 1 (fragment) [Pseudomonas sp. P14]	0	FALSE	48.651	71	7	11	290	3	115	12.3	6.39	872.12	7	5	0.783	1.136	1.567	0.898103	0.975244	0.976549	12.99	18.49	9.56	99.3	118.6	82.1				3.5727e+08	4.26707e+08	2.95553e+08	High	High	High	1
FALSE	High	Master Protein	P14_v1_910028	ID:109594055 DUF3800 domain-containing protein [Pseudomonas sp. P14]	0	FALSE	48.642	43	9	10	38	9	239	27.7	7.81	101.2	9	0	0.747	1.375	1.977	0.586258	0.940169	0.758836	12.65	20.24	26.71	101.1	139.4	59.4				2.94962e+06	4.06645e+06	1.73361e+06	High	High	High	1
FALSE	High	Master Protein	P14_v1_680011	ID:109593448 lolA| Outer-membrane lipoprotein carrier protein [Pseudomonas sp. P14]	0	FALSE	48.639	59	10	12	64	10	207	22.9	6.24	186.55	10	0	0.725	1.45	1.917	0.647404	0.963276	0.843933	15.06	27.77	37.64	93.4	143.9	62.7				6.72149e+06	1.03597e+07	4.51283e+06	High	High	High	1
FALSE	High	Master Protein	P14_v1_1010011	ID:109594253 kbp| K(+) binding protein [Pseudomonas sp. P14]	0	FALSE	48.607	64	8	11	141	8	146	15.6	5.55	452.92	8	0	1.49	1.195	0.819	0.205338	0.989781	0.725668	15.37	52.49	73.93	129.9	83.9	86.2				4.45178e+07	2.87575e+07	2.95238e+07	High	High	High	1
FALSE	High	Master Protein	P14_v1_1080010	ID:109594368 efp| Elongation factor P [Pseudomonas sp. P14]	0	FALSE	48.585	35	11	12	193	11	189	21.3	4.87	561.01	11	0	0.893	2.024	2.249	0.984666	0.68823	0.801783	13.08	64.73	67.86	110	125.4	64.6				1.33581e+08	1.52191e+08	7.83898e+07	High	High	High	1
FALSE	High	Master Protein	P13647	SWISS-PROT:P13647 Tax_Id=9606 Gene_Symbol=KRT5 Keratin, type II cytoskeletal 5	0	TRUE	48.573	23	18	18	47	9	590	62.3	7.74	89.18	18	3	0.804	1.206	1.567	0.795771	0.980679	0.885242	33.56	39.83	12.18	99.6	123.8	76.6				2.07985e+06	2.58576e+06	1.59878e+06	High	High	High	1
FALSE	High	Master Protein	P14_v1_90069	ID:109590638 rplS| 50S ribosomal subunit protein L19 [Pseudomonas sp. P14]	0	FALSE	48.514	66	9	11	201	9	116	13	10.27	612.86	9	0	0.799	1.284	1.607	0.919958	0.999657	0.973767	4.48	45	54.24	100.8	128.5	70.6				1.41878e+08	1.80839e+08	9.93337e+07	High	High	High	1
FALSE	High	Master Protein	P14_v1_50037	ID:109590064 branched-chain amino acid transport system substrate-binding protein [Pseudomonas sp. P14]	0	FALSE	48.51	37	13	13	33	13	382	40.4	7.52	88.29	13	0	0.919	0.973	1.048	0.965998	0.977723	0.986222	25.21	14.04	44.06	93.4	101.8	104.8				2.11345e+06	2.3032e+06	2.37055e+06	High	High	High	1
FALSE	High	Master Protein	P14_v1_140058	ID:109591095 eutC| Ethanolamine ammonia-lyase small subunit [Pseudomonas sp. P14]	0	FALSE	48.42	56	12	13	41	12	272	29.6	6.92	117.75	12	0	1.701	4.747	2.556	0.101094	0.00319875	0.354778	12.23	21.53	17.82	166.2	97.8	36				2.29372e+06	1.34979e+06	497204	High	High	High	1
FALSE	High	Master Protein	P14_v1_230043	ID:109591672 eda| KHG/KDPG aldolase [Pseudomonas sp. P14]	0	FALSE	48.341	49	10	11	118	10	226	24.1	5.71	319.24	10	0	0.034	0.569	16.055	1.64131e-16	0.401281	7.61556e-06	10.09	17.31	44.9	9.2	274.4	16.4				2.41309e+06	7.19185e+07	4.29607e+06	High	High	High	1	Met-loss [N-Term]
FALSE	High	Master Protein	P14_v1_120081	ID:109590943 acrA| multidrug efflux pump membrane fusion lipoprotein AcrA [Pseudomonas sp. P14]	0	FALSE	48.297	43	12	12	23	12	391	42	5.99	73.02	12	0	3.323	14.36	4.235	5.9923e-10	7.70261e-09	0.121859	17.94	22.64	40.58	236.3	61.4	2.3				5.37613e+06	1.39633e+06	51545.9	High	High	High	1
FALSE	High	Master Protein	P14_v1_370039	ID:109592394 murC| UDP-N-acetylmuramate--L-alanine ligase [Pseudomonas sp. P14]	0	FALSE	48.297	25	12	14	54	12	482	52.1	6.37	155.41	12	0	0.909	1.573	1.771	0.984666	0.907703	0.896324	20.3	38.89	10.58	113.5	119.4	67.1				9.19805e+06	9.67823e+06	5.437e+06	High	High	High	1
FALSE	High	Master Protein	P14_v1_110072	ID:109590839 diguanylate cyclase [Pseudomonas sp. P14]	0	FALSE	48.269	17	17	17	30	17	1276	144.2	5.91	64.98	17	0	0.955	0.424	0.625	0.984666	0.301476	0.835567	24.05	57.67	68.65	63.2	99.9	136.9				258762	408716	560417	High	High	High	1
FALSE	High	Master Protein	P14_v1_650008	ID:109593351 yiaD| putative lipoprotein YiaD [Pseudomonas sp. P14]	0	FALSE	48.169	56	8	13	42	8	239	25.1	9.2	134.98	8	0	1.331	1.617	1.142	0.458824	0.866711	0.999424	14.32	30.52	13.29	135.9	91.2	73				5.74265e+06	3.85345e+06	3.08449e+06	High	High	High	1
FALSE	High	Master Protein	P14_v1_510011	ID:109592896 DUF541 domain-containing protein [Pseudomonas sp. P14]	0	FALSE	48.15	49	10	12	53	10	238	25.6	8.03	157.69	10	0	1.263	1.903	1.5	0.617307	0.786211	0.986275	13.9	23.62	12.43	122.6	102.6	74.8				1.98659e+07	1.6625e+07	1.21207e+07	High	High	High	1
FALSE	High	Master Protein	P14_v1_720007	ID:109593546 gloB| hydroxyacylglutathione hydrolase GloB [Pseudomonas sp. P14]	0	FALSE	47.97	46	9	10	36	9	259	28.7	6.37	104.56	9	0	0.903	1.257	1.423	0.961314	0.989781	0.94892	8.96	16.79	16.89	108	111.6	80.4				5.2441e+06	5.41883e+06	3.90258e+06	High	High	High	1
FALSE	High	Master Protein	P14_v1_220035	ID:109591599 murB| UDP-N-acetylenolpyruvoylglucosamine reductase [Pseudomonas sp. P14]	0	FALSE	47.925	41	11	11	43	11	339	37.5	6.89	101	11	0	0.694	1.028	1.284	0.444997	0.999657	0.937319	27.42	24.64	22.51	93.8	119.5	86.7				1.13951e+06	1.45103e+06	1.05303e+06	High	High	High	1
FALSE	High	Master Protein	P14_v1_730020	ID:109593581 phoU| negative regulator of the pho regulon [Pseudomonas sp. P14]	0	FALSE	47.909	49	11	13	40	11	256	28.9	5.35	112.61	11	0	0.973	0.988	1.121	0.994001	0.975744	0.996963	12.19	7.21	14.54	98.7	107.7	93.6				2.76928e+06	3.02303e+06	2.62667e+06	High	High	High	1
FALSE	High	Master Protein	P14_v1_50149	ID:109590176 DUF58 domain-containing protein [Pseudomonas sp. P14]	0	FALSE	47.853	51	12	12	30	12	313	34.7	9.8	78.61	12	0	1.188	0.627	0.499	0.904505	0.63701	0.386809	15.26	26.25	21.19	86.7	74.1	139.2				1.01441e+06	867661	1.62871e+06	High	High	High	1
FALSE	High	Master Protein	P14_v1_1030012	ID:109594285 phr| deoxyribodipyrimidine photolyase [Pseudomonas sp. P14]	0	FALSE	47.792	30	12	12	25	12	480	55	7.55	56.36	12	0	1.035	0.801	0.701	0.984666	0.916431	0.848663	7.14	21.7	25.95	94.8	79.8	125.4				1.02494e+06	862357	1.35639e+06	High	High	High	1
FALSE	High	Master Protein	P14_v1_20164	ID:109589557 hflX| ribosome rescue factor HflX [Pseudomonas sp. P14]	0	FALSE	47.752	36	11	11	48	11	433	48.8	5.72	115.41	11	0	1.058	1.354	1.244	0.979569	0.929243	0.959397	19	34.25	46.95	111.4	117.3	71.3				1.74298e+06	1.8348e+06	1.115e+06	High	High	High	1
FALSE	High	Master Protein	P14_v1_1030009	ID:109594282 Renalase [Pseudomonas sp. P14]	0	FALSE	47.565	31	7	10	53	7	328	36.1	6.23	147.58	7	0	0.847	2.009	2.347	0.902707	0.436894	0.286518	38.81	9.68	25.55	106.6	139.2	54.2				1.33747e+06	1.74728e+06	680104	High	High	High	1
FALSE	High	Master Protein	P14_v1_370019	ID:109592374 petA| Ubiquinol-cytochrome c reductase iron-sulfur subunit [Pseudomonas sp. P14]	0	FALSE	47.565	53	9	10	104	9	197	20.8	7.37	296.57	9	0	1.02	2.233	2.355	0.95737	0.525931	0.753757	5.16	18.53	23.72	120	126.3	53.7				4.93137e+07	5.19218e+07	2.20556e+07	High	High	High	1
FALSE	High	Master Protein	P14_v1_670018	ID:109593421 fumarylacetoacetase [Pseudomonas sp. P14]	0	FALSE	47.516	33	12	12	66	12	430	46.3	5.88	191.25	12	0	1.05	1.763	1.656	0.958614	0.850148	0.919855	20.03	19.45	22.58	118.1	113.9	68				7.65986e+06	7.38446e+06	4.41078e+06	High	High	High	1
FALSE	High	Master Protein	P14_v1_10172	ID:109589188 erythromycin esterase [Pseudomonas sp. P14]	0	FALSE	47.511	36	14	14	36	14	455	52.1	6.83	68.52	14	0	1.071	100	100	0.979569	1.38203e-16	1.15948e-16	14.35			167.9	132.1					1.56566e+06	1.23167e+06		High	High	n/a	1
FALSE	High	Master Protein	P14_v1_80035	ID:109590498 ppiA| peptidyl-prolyl cis-trans isomerase A [Pseudomonas sp. P14]	0	FALSE	47.408	58	7	12	73	7	185	20.2	8.1	202.22	7	0	0.928	1.628	1.548	0.998936	0.901804	0.959397	14.13	15.65	12.6	112.8	115.5	71.7				1.29229e+07	1.32263e+07	8.21757e+06	High	High	High	1
FALSE	High	Master Protein	P14_v1_270005	ID:109591872 ABC transporter related protein [Pseudomonas sp. P14]	0	FALSE	47.357	59	13	14	37	12	246	27.1	9.19	99.76	13	1	2.316	0.111	0.11	0.00130846	4.11881e-10	1.25799e-05	90.36	28.96	177.78	30.8	18.9	250.3				2.24125e+06	1.37718e+06	1.82232e+07	High	High	High	1
FALSE	High	Master Protein	P14_v1_260044	ID:109591858 potA| Spermidine/putrescine import ATP-binding protein PotA [Pseudomonas sp. P14]	0	FALSE	47.315	48	11	11	39	11	369	40.2	6.42	124.47	11	0	0.942	1.12	1.143	0.983625	0.994565	0.984725	9.88	14.44	29.7	104.9	110.5	84.6				1.6511e+06	1.73825e+06	1.33127e+06	High	High	High	1
FALSE	High	Master Protein	P14_v1_90034	ID:109590603 mucB| Sigma factor AlgU regulatory protein MucB [Pseudomonas sp. P14]	0	FALSE	47.3	42	12	12	34	12	321	35	6.81	79.82	12	0	1.214	1.229	0.972	0.76297	0.998721	0.949046	13.22	22.58	49.55	113.5	100.4	86.1				6.10756e+06	5.40257e+06	4.63568e+06	High	High	High	1
FALSE	High	Master Protein	P14_v1_30148	ID:109589780 cytochrome c oxidase subunit II [Pseudomonas sp. P14]	0	FALSE	47.214	27	10	11	68	10	375	42.1	6.67	223.16	10	0	1.011	0.64	0.615	0.984666	0.328184	0.558488	30.83	20.41	24.88	84.8	82.9	132.3				7.9843e+06	7.8049e+06	1.24631e+07	High	High	High	1
FALSE	High	Master Protein	P14_v1_30104	ID:109589736 glyQ| glycine--tRNA ligase subunit alpha [Pseudomonas sp. P14]	0	FALSE	47.173	38	10	12	71	10	315	36	5.11	189.28	10	0	0.886	1.671	2.136	0.984666	0.890393	0.816523	10.24	33.88	32.97	111.7	124.3	64				1.29916e+07	1.44639e+07	7.44437e+06	High	High	High	1
FALSE	High	Master Protein	P14_v1_10265	ID:109589281 galE| UDP-glucose 4-epimerase [Pseudomonas sp. P14]	0	FALSE	47.145	49	11	12	33	11	321	34.9	6.32	91.91	11	0	1.291	0.77	0.578	0.608464	0.78921	0.616141	14.1	21.07	33.49	100.3	77.2	122.5				2.566e+06	1.97519e+06	3.13412e+06	High	High	High	1
FALSE	High	Master Protein	P14_v1_300043	ID:109592069 usg| USG-1 protein homolog [Pseudomonas sp. P14]	0	FALSE	47.09	43	10	10	47	10	334	35.3	5.12	141.8	10	0	0.706	2.037	2.727	0.384821	0.427278	0.345103	24.11	59.27	58.23	103.9	145.2	50.9				2.69253e+06	3.76288e+06	1.31921e+06	High	High	High	1
FALSE	High	Master Protein	P14_v1_1460004	ID:109594703 nadA| quinolinate synthase [Pseudomonas sp. P14]	0	FALSE	47.06	49	13	14	41	13	352	38.4	5.19	98.41	13	0	1.004	1.22	1.155	0.985193	0.980727	0.998655	20.22	20.6	14.96	102.6	112.7	84.7				2.72677e+06	2.99471e+06	2.2511e+06	High	High	High	1
FALSE	High	Master Protein	P14_v1_30044	ID:109589676 copA| Copper resistance protein A [Pseudomonas sp. P14]	0	FALSE	47.025	24	14	14	52	14	621	69	6.38	120.66	14	0	0.99	0.746	0.81	0.994001	0.785223	0.896324	23.82	22.08	23.43	87.9	98.7	113.3				3.0919e+06	3.47195e+06	3.98559e+06	High	High	High	1
FALSE	High	Master Protein	P14_v1_10192	ID:109589208 Rhodanese-related sulfurtransferase [Pseudomonas sp. P14]	0	FALSE	46.997	27	11	11	33	11	527	57.1	5.68	97.95	11	0	0.963	0.904	0.917	0.984666	0.975244	0.976549	32.14	20.03	48.96	100.7	107.5	91.9				801773	855835	731837	High	High	High	1
FALSE	High	Master Protein	P14_v1_550018	ID:109593040 Pirin-like protein CC_3178 [Pseudomonas sp. P14]	0	FALSE	46.819	50	8	11	33	8	287	31.3	5.53	94.39	8	0	0.919	1.018	0.983	0.960714	0.996599	0.992192	12.27	36.17	44.48	94	96.4	109.5				1.06487e+06	1.09196e+06	1.23997e+06	High	High	High	1
FALSE	High	Master Protein	P14_v1_460027	ID:109592730 lptB| lipopolysaccharide transport system ATP binding protein LptB [Pseudomonas sp. P14]	0	FALSE	46.804	45	10	10	54	10	241	26.5	7.02	169.67	10	0	0.92	1.211	1.431	0.979569	0.990397	0.94892	9.44	71.88	37.52	103.6	110.8	85.5				4.52559e+06	4.83866e+06	3.73537e+06	High	High	High	1
FALSE	High	Master Protein	P14_v1_90041	ID:109590610 pdxJ| pyridoxine 5'-phosphate synthase [Pseudomonas sp. P14]	0	FALSE	46.789	49	9	10	54	9	246	26.6	6.18	170.91	9	0	0.962	1.473	1.584	0.984666	0.95788	0.961128	33.11	17.44	25.09	111.6	116.8	71.7				1.38685e+07	1.45148e+07	8.9094e+06	High	High	High	1
FALSE	High	Master Protein	P14_v1_130025	ID:109590970 rpoS| RNA polymerase, sigma S (sigma 38) factor [Pseudomonas sp. P14]	0	FALSE	46.763	39	11	12	56	10	335	38.2	5.25	161.68	11	0	0.97	0.221	0.216	0.994001	1.35841e-05	0.00242945	5.69	44.42	35.63	49.9	47.9	202.2				5.01128e+06	4.80512e+06	2.02835e+07	High	High	High	1
FALSE	High	Master Protein	P14_v1_120027	ID:109590889 Restriction endonuclease type IV Mrr domain-containing protein [Pseudomonas sp. P14]	0	FALSE	46.724	39	11	11	29	11	314	35.7	5.97	97.25	11	0	1.031	1.006	1.038	0.984666	0.989781	0.995257	32.52	21.06	36.15	92.2	115.3	92.5				1.49038e+06	1.86506e+06	1.49606e+06	High	High	High	1
FALSE	High	Master Protein	P14_v1_10105	ID:109589121 metallo-beta-lactamase family protein [Pseudomonas sp. P14]	0	FALSE	46.718	34	11	11	23	11	455	50.2	7.34	72.61	11	0	1.201	100	100	0.828554	1.38203e-16	1.15948e-16	13.4			143.8	156.2					2.16316e+06	2.3492e+06		High	High	High	1
FALSE	High	Master Protein	P14_v1_50056	ID:109590083 LysR family transcriptional regulator [Pseudomonas sp. P14]	0	FALSE	46.706	39	10	13	42	10	323	36.2	6.24	115.67	10	0	0.995	0.912	1.065	0.989064	0.948129	0.986222	13.11	29.6	30.91	98.5	101.9	99.6				2.61043e+06	2.70043e+06	2.6415e+06	High	High	High	1	Met-loss [N-Term]
FALSE	High	Master Protein	P14_v1_10049	ID:109589065 DUF2252 domain-containing protein [Pseudomonas sp. P14]	0	FALSE	46.688	30	13	13	42	13	471	53.3	9.54	99.68	13	0	1.535	4.634	2.695	0.125274	0.00371215	0.175527	9.24	40.06	36.75	164	102.9	33				3.18802e+06	2.00053e+06	642274	High	High	High	1
FALSE	High	Master Protein	P14_v1_240049	ID:109591733 rplQ| 50S ribosomal subunit protein L17 [Pseudomonas sp. P14]	0	FALSE	46.672	54	8	14	137	8	128	14.4	10.59	424.01	8	0	0.799	1.455	1.801	0.919958	0.975244	0.936052	23.32	34.52	30.56	100.4	130.5	69.2				8.14299e+07	1.05852e+08	5.61027e+07	High	High	High	1
FALSE	High	Master Protein	P14_v1_60132	ID:109590326 periplasmic copper chaperone A [Pseudomonas sp. P14]	0	FALSE	46.547	73	8	18	104	8	160	16.8	6.89	237.84	8	0	0.819	1.742	2.327	0.917123	0.8303	0.645468	13.24	26.33	36.35	107.5	126	66.5				8.93392e+06	1.04662e+07	5.52286e+06	High	High	High	1
FALSE	High	Master Protein	P14_v1_100076	ID:109590750 soxA| Sarcosine oxidase subunit alpha [Pseudomonas sp. P14]	0	FALSE	46.54	18	14	14	33	14	1004	109.2	7.3	74.5	14	0	1.015	0.481	0.644	0.986584	0.182495	0.71414	25.08	52.9	17.1	103.1	86.9	110				1.92154e+06	1.61881e+06	2.04833e+06	High	High	High	1
FALSE	High	Master Protein	P14_v1_390010	ID:109592437 Poly(3-hydroxyalkanoate) granule-associated protein PhaI [Pseudomonas sp. P14]	0	FALSE	46.52	57	9	12	111	9	139	15.5	9.11	315.07	9	0	1.284	9.941	7.045	0.565877	1.94927e-07	0.00741708	21.44	44.99	47.38	162.4	124.1	13.5				2.7389e+07	2.09248e+07	2.27416e+06	High	High	High	1
FALSE	High	Master Protein	P14_v1_630010	ID:109593291 NADPH:quinone reductase [Pseudomonas sp. P14]	0	FALSE	46.503	43	11	12	54	11	320	33.9	4.98	169.33	11	0	1.082	1.778	1.565	0.939049	0.807953	0.937508	19.38	19.64	40.51	119.4	110.2	70.4				8.29442e+06	7.65626e+06	4.88962e+06	High	High	High	1
FALSE	High	Master Protein	P14_v1_180038	ID:109591346 dusA| tRNA-dihydrouridine synthase A [Pseudomonas sp. P14]	0	FALSE	46.352	52	9	9	26	9	312	34.5	6.68	83.58	9	0	0.792	0.838	1.023	0.805584	0.948129	0.999864	16.95	25.4	9.15	86.2	104.4	109.4				862167	1.0443e+06	1.09418e+06	High	High	High	1
FALSE	High	Master Protein	P14_v1_270001	ID:109591868 exaE| Transcriptional activator protein ExaE [Pseudomonas sp. P14]	0	FALSE	46.28	65	11	11	21	11	212	23.2	8.06	59.29	11	0	100	0.045	0.01	1.64131e-16	9.85726e-14	1.15948e-16		30.24		1.7		298.3				23652.8		4.23793e+06	High	High	High	1
FALSE	High	Master Protein	P14_v1_380011	ID:109592410 fruR| Fructose operon regulatory protein [Pseudomonas sp. P14]	0	FALSE	46.178	44	13	13	44	13	331	36.1	6.7	123.99	13	0	1.669	2.525	1.544	0.0711379	0.297301	0.944122	12.54	30.91	40.11	141.7	88	70.3				1.38551e+07	8.61076e+06	6.87598e+06	High	High	High	1
FALSE	High	Master Protein	P14_v1_330008	ID:109592197 rhlB| ATP-dependent RNA helicase RhlB [Pseudomonas sp. P14]	0	FALSE	46.177	28	10	14	44	10	480	53.1	7.94	112.47	10	0	1.058	2.047	1.899	0.958614	0.500163	0.801783	28.71	61.24	27.62	114.5	118.4	67.1				3.80223e+06	3.93408e+06	2.2291e+06	High	High	High	1
FALSE	High	Master Protein	P14_v1_680005	ID:109593442 Anthranilate phosphoribosyltransferase [Pseudomonas sp. P14]	0	FALSE	46.175	52	12	13	39	12	333	37.2	6.84	87.45	12	0	0.905	0.982	1.136	0.95737	0.984595	0.994668	22.27	27.72	29.84	94.8	107.8	97.4				1.66255e+06	1.89189e+06	1.70908e+06	High	High	High	1	Met-loss [N-Term]
FALSE	High	Master Protein	P14_v1_590028	ID:109593177 rfbD| dTDP-4-dehydrorhamnose reductase [Pseudomonas sp. P14]	0	FALSE	46.173	43	9	11	36	9	301	32.3	6.61	122.53	9	0	1.107	1.035	0.898	0.924574	0.981142	0.938608	15.82	6.15	20.28	104.3	90.6	105				2.98371e+06	2.59275e+06	3.00409e+06	High	High	High	1
FALSE	High	Master Protein	P14_v1_140057	ID:109591094 eutB| ethanolamine ammonia-lyase subunit alpha [Pseudomonas sp. P14]	0	FALSE	46.158	35	10	12	23	10	464	49.9	5.36	71.82	10	0	1.6	4.004	2.473	0.235566	0.012964	0.580467	24.06	60.13	48.27	199.4	78	22.6				1.99564e+06	781019	226484	High	High	High	1	Met-loss [N-Term]
FALSE	High	Master Protein	P14_v1_20168	ID:109589561 amiC| N-acetylmuramoyl-L-alanine amidase AmiC [Pseudomonas sp. P14]	0	FALSE	46.141	27	10	10	30	10	476	50.8	9.79	84.78	10	0	1.163	1.114	0.797	0.919958	0.989781	0.926846	26.45	30.84	35.4	107.5	92.6	99.9				1.2819e+06	1.10386e+06	1.19192e+06	High	High	High	1
FALSE	High	Master Protein	P14_v1_760008	ID:109593650 ATP-binding protein [Pseudomonas sp. P14]	0	FALSE	46.099	33	11	12	58	11	424	48.1	5.33	147.17	11	0	1.125	1.148	1.1	0.898103	0.999657	0.989417	17.88	15.39	40.55	107	103.4	89.7				4.28644e+06	4.14112e+06	3.59273e+06	High	High	High	1
FALSE	High	Master Protein	P14_v1_1570003	ID:109594744 epd| D-erythrose-4-phosphate dehydrogenase [Pseudomonas sp. P14]	0	FALSE	46.074	47	13	14	38	12	352	38.5	6.4	82.36	13	0	1.031	1.137	1.28	0.980603	0.999657	0.977897	29.75	34.5	63.45	108.3	101.9	89.9				3.40451e+06	3.20353e+06	2.82701e+06	High	High	High	1
FALSE	High	Master Protein	P14_v1_40130	ID:109589972 eco| serine protease inhibitor ecotin [Pseudomonas sp. P14]	0	FALSE	46.066	61	9	10	76	9	159	17.4	8.38	210.63	9	0	1.148	1.1	1.06	0.852044	0.963276	0.939197	14.06	11.51	22.71	107.6	95.8	96.6				1.39059e+07	1.23891e+07	1.24921e+07	High	High	High	1
FALSE	High	Master Protein	P14_v1_660013	ID:109593388 serine-type D-Ala-D-Ala carboxypeptidase/endopeptidase (penicillin-binding protein 4) [Pseudomonas sp. P14]	0	FALSE	46.026	25	9	12	50	9	484	52.4	9.47	148.27	9	0	0.716	0.751	1.141	0.486537	0.740473	0.988477	24.58	52.46	55.63	79.9	104.4	115.6				3.64859e+06	4.76651e+06	5.27712e+06	High	High	High	1
FALSE	High	Master Protein	P14_v1_1270007	ID:109594571 DUF2059 domain-containing protein [Pseudomonas sp. P14]	0	FALSE	46.003	62	10	12	84	10	174	19	9.5	244.02	10	0	0.992	1.38	1.381	0.978915	0.989781	0.997122	14.74	26.71	17.96	111	108.4	80.6				3.40081e+07	3.31948e+07	2.46708e+07	High	High	High	1
FALSE	High	Master Protein	P14_v1_450019	ID:109592685 gcvT| aminomethyltransferase [Pseudomonas sp. P14]	0	FALSE	45.896	40	11	11	60	11	360	39.3	5.58	152.5	11	0	1.143	0.703	0.624	0.895216	0.497771	0.60209	20.22	31.53	43.48	94.1	82.2	123.8				8.38999e+06	7.32874e+06	1.10398e+07	High	High	High	1
FALSE	High	Master Protein	P14_v1_70005	ID:109590337 GntR family transcriptional regulator, rspAB operon transcriptional repressor [Pseudomonas sp. P14]	0	FALSE	45.862	45	10	11	38	9	250	28.7	5.57	93.08	10	1	1.003	1.106	1.367	0.994001	0.996599	0.93939	15.72	43.35	32.3	98.3	111.9	89.8				1.78726e+06	2.03394e+06	1.63146e+06	High	High	High	1
FALSE	High	Master Protein	P14_v1_190024	ID:109591401 chromosome partitioning protein [Pseudomonas sp. P14]	0	FALSE	45.835	46	8	8	35	8	257	28.7	5.11	118.23	8	0	0.968	1.116	1.148	0.990588	0.992686	0.999424	11.13	37.79	36.94	103.9	98.4	97.7				3.42486e+06	3.24349e+06	3.21821e+06	High	High	High	1
FALSE	High	Master Protein	P14_v1_640031	ID:109593341 ftsX| Cell division protein FtsX [Pseudomonas sp. P14]	0	FALSE	45.732	40	12	12	36	12	341	36.9	6.58	108.08	12	0	1.091	0.811	0.879	0.939049	0.855956	0.93347	13.01	29.06	30.47	97.4	87	115.6				2.59293e+06	2.31452e+06	3.07497e+06	High	High	High	1
FALSE	High	Master Protein	P14_v1_380025	ID:109592424 membrane fusion protein, adhesin transport system [Pseudomonas sp. P14]	0	FALSE	45.729	35	8	9	31	8	394	43.4	6.25	98.14	8	0	0.979	2.05	2.212	0.999405	0.502395	0.618854	6.01	49.25	38.81	109.5	114.6	75.9				2.98906e+06	3.12806e+06	2.07112e+06	High	High	High	1	Met-loss [N-Term]
FALSE	High	Master Protein	P14_v1_240005	ID:109591689 ribA| GTP cyclohydrolase 2 [Pseudomonas sp. P14]	0	FALSE	45.719	63	9	9	38	9	205	22.3	7.01	109.92	9	0	0.801	1.354	1.752	0.807326	0.964781	0.863541	8.93	48.59	19.36	105	135.7	59.3				4.44929e+06	5.75427e+06	2.5133e+06	High	High	High	1
FALSE	High	Master Protein	P14_v1_340017	ID:109592250 Succinylglutamate desuccinylase [Pseudomonas sp. P14]	0	FALSE	45.691	35	8	9	27	8	371	40.9	6.34	90.3	8	0	1.08	1.27	1.3	0.944855	0.980679	0.976549	19.31	56.1	34.43	110.9	107.5	81.6				4.02366e+06	3.9014e+06	2.96074e+06	High	High	High	1
FALSE	High	Master Protein	P14_v1_220014	ID:109591578 DUF4823 domain-containing protein [Pseudomonas sp. P14]	0	FALSE	45.687	66	10	10	23	10	201	22.3	5.26	71.69	10	0	1.417	0.596	0.422	0.49529	0.487219	0.216737	32.32	45.61	40.83	80	61.4	158.6				1.25755e+06	964144	2.49182e+06	High	High	High	1
FALSE	High	Master Protein	P14_v1_1590001	ID:109594748 fleR| Response regulator protein FleR [Pseudomonas sp. P14]	0	FALSE	45.59	28	11	11	32	10	451	49.1	6.07	78.12	11	1	1.168	1.221	1.077	0.904505	0.978308	0.999424	20.24	29.11	38.9	115.4	101.3	83.3				1.94789e+06	1.70946e+06	1.40652e+06	High	High	High	1
FALSE	High	Master Protein	P14_v1_280046	ID:109591963 CBS domain protein [Pseudomonas sp. P14]	0	FALSE	45.476	62	8	12	65	8	145	16	7.43	229.28	8	0	1.203	1.846	1.539	0.743224	0.787916	0.967191	25.46	29.93	29.9	136.1	110.4	53.5				1.86447e+07	1.51221e+07	7.32432e+06	High	High	High	1
FALSE	High	Master Protein	P14_v1_140046	ID:109591083 acoB| Acetoin:2,6-dichlorophenolindophenol oxidoreductase subunit beta [Pseudomonas sp. P14]	0	FALSE	45.471	46	12	12	26	12	340	36.5	5.03	72.22	12	0	2.567	17.147	6.263	1.25529e-05	3.07597e-10	0.00027578	15.72	41.73	36.09	218.4	75.7	5.9				8.42613e+06	2.9197e+06	228972	High	High	Peak Found	1
FALSE	High	Master Protein	P14_v1_1040008	ID:109594300 ptxS| HTH-type transcriptional regulator PtxS [Pseudomonas sp. P14]	0	FALSE	45.469	48	12	15	29	12	339	36.8	7.08	76.72	12	0	0.067	0.742	10.514	1.64131e-16	0.714788	0.000145813	23.59	69.75	64.83	79.3	180.6	40.1				6.0167e+06	1.37051e+07	3.0438e+06	High	High	High	1
FALSE	High	Master Protein	P14_v1_640010	ID:109593320 23S rRNA (cytosine1962-C5)-methyltransferase [Pseudomonas sp. P14]	0	FALSE	45.447	37	15	16	61	15	398	44.1	6.74	139.74	15	0	0.999	1.079	1.266	0.984666	0.967567	0.999864	26.34	27.47	31.91	96.7	114.2	89				8.78645e+06	1.03779e+07	8.08847e+06	High	High	High	1
FALSE	High	Master Protein	P14_v1_370021	ID:109592376 petC| Cytochrome c1 [Pseudomonas sp. P14]	0	FALSE	45.423	56	10	13	53	10	259	29	7.09	114.48	10	0	1.065	1.913	2.033	0.951522	0.775668	0.775827	12.45	15.84	36.52	123.1	115.9	61				7.96686e+06	7.49601e+06	3.94709e+06	High	High	High	1
FALSE	High	Master Protein	P14_v1_1160003	ID:109594461 yajQ| nucleotide binding protein YajQ [Pseudomonas sp. P14]	0	FALSE	45.4	42	8	9	60	8	161	18.6	7.2	207.63	8	0	0.836	1.086	1.299	0.951522	0.956391	0.983942	19.63	32.39	20.38	98.6	113.9	87.5				2.01413e+07	2.32722e+07	1.78826e+07	High	High	High	1	Met-loss [N-Term]
FALSE	High	Master Protein	P14_v1_1380007	ID:109594661 bioD| dethiobiotin synthetase [Pseudomonas sp. P14]	0	FALSE	45.39	57	9	9	36	9	226	23.8	5.38	108.35	9	0	1.058	1.033	0.957	0.980603	0.990397	0.974667	13.72	14.6	27.48	102.5	94.3	103.1				1.61831e+06	1.48887e+06	1.62761e+06	High	High	High	1
FALSE	High	Master Protein	P14_v1_20138	ID:109589531 ydfG| 3-hydroxy acid dehydrogenase YdfG [Pseudomonas sp. P14]	0	FALSE	45.372	43	10	11	70	10	254	27.4	6.35	205.59	10	0	0.895	1.265	1.394	0.984666	0.999657	0.999424	16.1	29.54	32.75	104.4	105.7	89.9				1.38498e+07	1.40255e+07	1.19324e+07	High	High	High	1
FALSE	High	Master Protein	P14_v1_300011	ID:109592037 yliI| aldose sugar dehydrogenase YliI [Pseudomonas sp. P14]	0	FALSE	45.348	36	11	12	24	11	381	41.7	6.07	73.47	11	0	1.345	1.164	0.764	0.653434	0.989781	0.885996	8.86	38.24	44.77	118.7	85.3	96				1.68873e+06	1.21295e+06	1.36621e+06	High	High	High	1
FALSE	High	Master Protein	P14_v1_60033	ID:109590227 D-alanine--poly(phosphoribitol) ligase subunit 1 [Pseudomonas sp. P14]	0	FALSE	45.34	9	13	14	21	13	1746	191.9	6.3	48.41	13	0	0.22	0.882	3.848	3.91101e-10	0.960105	0.0926282	12.98	39.77	49.13	62.8	190.8	46.4				453607	1.3776e+06	334876	High	High	High	1
FALSE	High	Master Protein	P14_v1_1960001	ID:109594801 protein of unknown function [Pseudomonas sp. P14]	0	FALSE	45.285	39	6	10	126	3	259	26.6	4.49	375.68	6	3	1.13	0.815	0.709	0.898103	0.749871	0.69896	27.58	39.85	69.18	95.9	78.1	126				7.5004e+06	6.10847e+06	9.86001e+06	High	High	High	1
FALSE	High	Master Protein	P14_v1_1240005	ID:109594549 btsT| pyruvate:H(+) symporter [Pseudomonas sp. P14]	0	FALSE	45.158	17	12	14	55	11	688	73.7	8.75	136.03	12	1	1.387	1.17	0.745	0.334828	0.990397	0.805347	20.4	47.76	30.64	118.2	77.1	104.7				8.68636e+06	5.66608e+06	7.69587e+06	High	High	High	1
FALSE	High	Master Protein	P14_v1_20069	ID:109589462 lipA| lipoyl synthase [Pseudomonas sp. P14]	0	FALSE	45.145	50	14	14	52	14	338	37.9	7.12	128.12	14	0	1.187	0.81	0.696	0.863477	0.875309	0.801783	29.28	21.98	33.62	94.3	80.8	124.8				2.26053e+06	1.93679e+06	2.99073e+06	High	High	High	1	Met-loss [N-Term]
FALSE	High	Master Protein	P14_v1_30006	ID:109589638 zwf| NADP(+)-dependent glucose-6-phosphate dehydrogenase [Pseudomonas sp. P14]	0	FALSE	45.078	27	9	10	41	8	480	54.5	6.89	116.34	9	0	1.332	0.937	0.58	0.648661	0.964781	0.577778	28.11	32.87	26.11	97.3	71.2	131.4				1.836e+06	1.34343e+06	2.47887e+06	High	High	High	1
FALSE	High	Master Protein	P14_v1_680025	ID:109593462 50S ribosomal protein L16 3-hydroxylase [Pseudomonas sp. P14]	0	FALSE	45.013	23	6	8	26	6	388	43.9	4.54	87.96	6	0	0.739	1.354	1.884	0.623277	0.93526	0.713338	40.12	22.2	53.17	91.1	132.9	76				778443	1.13546e+06	649183	High	High	High	1
FALSE	High	Master Protein	P14_v1_1190005	ID:109594498 cyoA| cytochrome bo3 ubiquinol oxidase subunit 2 [Pseudomonas sp. P14]	0	FALSE	44.97	32	7	10	53	7	313	34.5	6.7	198.42	7	0	1.514	3.309	2.206	0.176689	0.0585274	0.69562	16.38	19.11	24.31	162.6	97.5	39.9				1.85872e+07	1.11427e+07	4.55486e+06	High	High	High	1
FALSE	High	Master Protein	P14_v1_800010	ID:109593771 tlpQ| Methyl-accepting chemotaxis protein TlpQ [Pseudomonas sp. P14]	0	FALSE	44.837	28	14	15	35	12	714	76.9	5.06	93.94	14	0	1.406	0.171	0.122	0.62752	0.000100243	3.8825e-06	16.61	47.87	77.08	59.7	23.5	216.8				602627	237431	2.18775e+06	High	High	High	1
FALSE	High	Master Protein	P14_v1_170031	ID:109591272 apaH| diadenosine tetraphosphatase [Pseudomonas sp. P14]	0	FALSE	44.764	40	12	14	44	12	288	32.6	6.6	118.81	12	0	0.868	0.978	1.074	0.92833	0.979219	0.996963	16.22	19.96	46.72	97.2	98.9	104				2.0109e+06	2.04622e+06	2.15253e+06	High	High	High	1
FALSE	High	Master Protein	P14_v1_330033	ID:109592222 1-acylglycerone phosphate reductase [Pseudomonas sp. P14]	0	FALSE	44.758	53	13	14	33	13	270	28.6	9.55	87.65	13	0	1.411	1.217	1.06	0.522221	0.980679	0.999424	32.85	40.37	18.57	119.7	88.7	91.6				1.69531e+06	1.25577e+06	1.29755e+06	High	High	High	1
FALSE	High	Master Protein	P14_v1_320021	ID:109592157 queA| tRNA preQ1(34) S-adenosylmethionine ribosyltransferase-isomerase [Pseudomonas sp. P14]	0	FALSE	44.746	41	10	10	41	10	349	38.3	6.28	109.98	10	0	0.861	0.826	1.029	0.917123	0.890393	0.976549	15.73	28.23	24.49	97.9	113.9	88.2				2.84103e+06	3.30712e+06	2.56123e+06	High	High	High	1
FALSE	High	Master Protein	P14_v1_300048	ID:109592074 folC| bifunctional folylpolyglutamate synthetase/dihydrofolate synthetase [Pseudomonas sp. P14]	0	FALSE	44.685	41	13	13	30	13	435	46.8	5.15	80.72	13	0	1.102	1.056	1.024	0.951522	0.996599	0.989417	22.61	33.9	56.08	105.6	96.2	98.2				1.80319e+06	1.64188e+06	1.67575e+06	High	High	High	1
FALSE	High	Master Protein	P14_v1_170033	ID:109591274 rsmA| 16S rRNA m(6)2A1518,m(6)2A1519 dimethyltransferase [Pseudomonas sp. P14]	0	FALSE	44.637	61	13	13	58	13	267	29.6	8.24	155.81	13	0	0.834	1.125	1.385	0.894017	0.999657	0.963849	9.4	10.82	27.77	95.7	125.3	79				3.17577e+06	4.15801e+06	2.62333e+06	High	High	High	1
FALSE	High	Master Protein	P14_v1_470011	ID:109592755 1-pyrroline-4-hydroxy-2-carboxylate deaminase [Pseudomonas sp. P14]	0	FALSE	44.55	42	11	12	34	11	315	34.1	6.54	89.57	11	0	1.106	0.084	0.093	0.961314	2.20508e-09	9.33216e-06	31.54	44.06	30.85	18.1	16.4	265.5				403002	364350	5.89921e+06	High	High	High	1	Met-loss [N-Term]
FALSE	High	Master Protein	P02533	SWISS-PROT:P02533 Tax_Id=9606 Gene_Symbol=KRT14 Keratin, type I cytoskeletal 14	0	TRUE	44.461	24	12	15	55	2	472	51.6	5.16	119.51	12	6	0.595	0.886	2.056	0.173723	0.967276	0.709609	15.14	77.27	69.71	80.4	142.3	77.2				485895	859973	466541	High	High	High	1
FALSE	High	Master Protein	P14_v1_480016	ID:109592797 greA| transcription elongation factor GreA [Pseudomonas sp. P14]	0	FALSE	44.338	63	10	12	45	10	160	17.6	4.89	130.2	10	0	1.239	1.066	0.84	0.657527	0.949634	0.748573	5.41	16.28	17.86	112.6	90.5	96.8				2.021e+07	1.62418e+07	1.73742e+07	High	High	High	1
FALSE	High	Master Protein	P14_v1_890013	ID:109593993 H-NS family protein MvaT [Pseudomonas sp. P14]	0	FALSE	44.329	48	8	9	106	8	119	13.5	9.99	322.66	8	0	1.121	1.469	1.265	0.887917	0.972165	0.976549	6	40.72	43.68	118	105.7	76.3				6.19886e+07	5.55249e+07	4.01034e+07	High	High	High	1
FALSE	High	Master Protein	P14_v1_40137	ID:109589979 ppiC| peptidyl-prolyl cis-trans isomerase C [Pseudomonas sp. P14]	0	FALSE	44.299	87	7	9	133	7	93	9.9	5.86	436.31	7	0	1.011	2.169	2.149	0.961812	0.574684	0.84696	20.84	24.68	29.63	120.2	122.8	57				3.31098e+07	3.38327e+07	1.57155e+07	High	High	High	1
FALSE	High	Master Protein	P14_v1_650020	ID:109593363 hprA| Glycerate dehydrogenase [Pseudomonas sp. P14]	0	FALSE	44.295	47	10	10	29	10	321	34.1	6.16	78.42	10	0	0.86	2.336	2.228	0.908552	0.446243	0.698609	23.04	30.56	8.02	130.4	139.8	29.8				754610	809257	172369	High	High	High	1
FALSE	High	Master Protein	P14_v1_280008	ID:109591925 ompR| DNA-binding transcriptional dual regulator OmpR [Pseudomonas sp. P14]	0	FALSE	44.189	47	10	11	48	10	246	27.5	6.15	139.21	10	0	1.04	1.016	1.084	0.95737	0.946654	0.971401	19.95	55.54	48.03	96.6	109.9	93.5				9.09732e+06	1.03488e+07	8.80602e+06	High	High	High	1	Met-loss [N-Term]
FALSE	High	Master Protein	P14_v1_560024	ID:109593079 Oxaloacetate decarboxylase [Pseudomonas sp. P14]	0	FALSE	44.179	40	7	8	20	7	289	31.5	5.29	63.44	7	0	0.597	2.819	4.797	0.128836	0.175599	0.00456031	9.59	27.68	24	100.1	169.8	30.1				1.30566e+06	2.21378e+06	392310	High	High	High	1
FALSE	High	Master Protein	P14_v1_730019	ID:109593580 two-component system, chemotaxis family, chemotaxis protein CheY [Pseudomonas sp. P14]	0	FALSE	44.141	42	10	10	28	10	296	31.8	8.62	113.03	10	0	0.599	1.289	2.166	0.0902007	0.964781	0.676662	10.29	34.33	10.32	86.9	144.4	68.7				2.85509e+06	4.74182e+06	2.25476e+06	High	High	High	1
FALSE	High	Master Protein	P14_v1_810003	ID:109593786 cytochrome c oxidase cbb3-type subunit II [Pseudomonas sp. P14]	0	FALSE	44.106	56	10	11	45	5	202	22.7	8.4	144.95	10	0	1.245	100	100	0.676296	1.38203e-16	1.15948e-16	11.8			167.8	132.2					6.48345e+06	5.10786e+06		High	High	n/a	1
FALSE	High	Master Protein	P14_v1_380024	ID:109592423 two-component system, chemotaxis family, chemotaxis protein CheV [Pseudomonas sp. P14]	0	FALSE	44.099	50	11	11	31	11	299	32.2	6.13	70.43	11	0	0.829	0.5	0.641	0.893834	0.213947	0.709609	20.65	33.58	25.3	58.3	90.3	151.4				1.46638e+06	2.27154e+06	3.81072e+06	High	High	High	1
FALSE	High	Master Protein	P14_v1_100073	ID:109590747 glyA| serine hydroxymethyltransferase [Pseudomonas sp. P14]	0	FALSE	44.073	27	12	13	34	8	417	44.5	6.4	88.06	12	1	0.984	0.65	0.793	0.990517	0.546797	0.885242	12.37	21.7	23.33	102.2	101.4	96.4				4.26347e+06	4.22835e+06	4.02259e+06	High	High	High	1
FALSE	High	Master Protein	P14_v1_170034	ID:109591275 pdxA| 4-hydroxythreonine-4-phosphate dehydrogenase [Pseudomonas sp. P14]	0	FALSE	44.051	53	12	12	38	12	329	34.9	6.32	89.11	12	0	0.735	1.191	1.421	0.601683	0.978308	0.896324	20.9	37.35	32.2	91.2	118.2	90.6				1.35047e+06	1.75082e+06	1.34137e+06	High	High	High	1
FALSE	High	Master Protein	P14_v1_420013	ID:109592563 Thoeris protein ThsA Macro domain-containing protein [Pseudomonas sp. P14]	0	FALSE	44.029	38	9	12	64	9	278	32.5	6.4	179.1	9	0	1.217	1.892	1.48	0.736517	0.785223	0.951678	18.17	34.69	18.44	129.7	105.7	64.7				7.85536e+06	6.40079e+06	3.91764e+06	High	High	High	1
FALSE	High	Master Protein	P14_v1_20074	ID:109589467 mltB| Membrane-bound lytic murein transglycosylase B [Pseudomonas sp. P14]	0	FALSE	43.999	34	10	10	39	10	336	37.7	6.13	77.54	10	0	0.769	1.426	2.132	0.734845	0.875309	0.404347	17.47	39.76	49.21	92.7	128.7	78.6				1.19368e+06	1.6578e+06	1.01239e+06	High	High	High	1
FALSE	High	Master Protein	P14_v1_110041	ID:109590808 Anti-bacteriophage protein A/HamA C-terminal domain-containing protein [Pseudomonas sp. P14]	0	FALSE	43.906	36	11	12	34	11	321	35.6	6.64	82.9	11	0	0.888	0.995	1.098	0.951522	0.952121	0.977355	11.27	14.41	18.82	92.6	110	97.4				5.05184e+06	5.99972e+06	5.31044e+06	High	High	High	1
FALSE	High	Master Protein	P14_v1_180056	ID:109591364 spuC| Putrescine--pyruvate aminotransferase [Pseudomonas sp. P14]	0	FALSE	43.897	30	9	12	39	5	452	49.6	6	99.41	9	0	0.879	1.39	1.549	0.947614	0.920286	0.890657	39.82	21.65	35.73	106.7	117.4	75.8				302780	333117	215053	High	High	High	1
FALSE	High	Master Protein	P14_v1_330043	ID:109592232 LysR family transcriptional regulator [Pseudomonas sp. P14]	0	FALSE	43.872	48	11	12	45	11	315	34.8	6.38	145.94	11	0	1.801	2.395	1.325	0.0147417	0.241732	0.93347	21.41	30.07	25.72	146	84.2	69.8				2.95275e+06	1.70266e+06	1.41081e+06	High	High	High	1
FALSE	High	Master Protein	P14_v1_1240001	ID:109594545 mscL| large conductance mechanosensitive channel [Pseudomonas sp. P14]	0	FALSE	43.829	55	8	8	22	8	139	14.7	5.19	94.02	8	0	0.797	1.134	1.278	0.767819	0.991915	0.976549	46.31	77.08	76.16	96.4	133.2	70.4				2.45954e+06	3.39829e+06	1.79541e+06	High	High	High	1
FALSE	High	Master Protein	P14_v1_500003	ID:109592855 ubiD| 3-octaprenyl-4-hydroxybenzoate decarboxylase [Pseudomonas sp. P14]	0	FALSE	43.654	32	12	12	26	12	488	54.7	6.24	74.53	12	0	1.022	1.383	1.207	0.985193	0.932351	0.976549	9.63	19.86	38.11	106.3	112.9	80.9				1.93326e+06	2.05311e+06	1.47138e+06	High	High	High	1
FALSE	High	Master Protein	P14_v1_130036	ID:109590981 agmR| Glycerol metabolism activator [Pseudomonas sp. P14]	0	FALSE	43.636	55	11	11	50	11	216	23.5	5.14	152.09	11	0	2.634	3.75	1.315	4.03935e-06	0.0352665	0.975856	11.63	44.21	9.81	200.5	58.6	41				1.12426e+07	3.28384e+06	2.29797e+06	High	High	High	1	Met-loss [N-Term]
FALSE	High	Master Protein	P14_v1_520021	ID:109592942 (S)-ureidoglycine aminohydrolase [Pseudomonas sp. P14]	0	FALSE	43.632	36	7	7	72	7	278	31.5	6.25	182.76	7	0	1.762	2.78	1.401	0.0188914	0.181123	0.958827	12.45	16.91	33.43	153.7	83.9	62.3				6.85072e+06	3.74069e+06	2.77636e+06	High	High	High	1	Met-loss [N-Term]
FALSE	High	Master Protein	P14_v1_50032	ID:109590059 udh| Uronate dehydrogenase [Pseudomonas sp. P14]	0	FALSE	43.62	53	10	10	33	10	270	30	6.07	79.88	10	0	0.598	2.215	3.816	0.138739	0.307487	0.0182199	23.04	12.89	11.24	88.3	154.4	57.3				1.29895e+06	2.27016e+06	841873	High	High	High	1
FALSE	High	Master Protein	P14_v1_120040	ID:109590902 Integrase [Pseudomonas sp. P14]	0	FALSE	43.586	35	11	12	24	11	412	46.4	9.23	57.19	11	0	0.842	1.2	1.305	0.898103	0.980355	0.944637	19.46	10.7	33.14	107.9	125.5	66.6				1.01269e+06	1.17845e+06	624786	High	High	High	1
FALSE	High	Master Protein	P14_v1_260040	ID:109591854 glpR| Glycerol-3-phosphate regulon repressor [Pseudomonas sp. P14]	0	FALSE	43.452	37	10	11	47	10	251	27.7	5.88	141.51	10	0	1.141	1.842	1.494	0.898103	0.579877	0.896324	40.15	50.63	33.52	122.3	109.6	68.2				2.68765e+06	2.40846e+06	1.49932e+06	High	High	High	1
FALSE	High	Master Protein	P14_v1_130076	ID:109591021 cobC| Threonine-phosphate decarboxylase [Pseudomonas sp. P14]	0	FALSE	43.433	32	9	9	26	9	330	35.8	6.95	69.77	9	0	1.041	1.575	1.49	0.984666	0.856865	0.904311	24.13	32.97	36.74	123.6	115	61.4				1.09858e+06	1.02217e+06	545825	High	High	High	1
FALSE	High	Master Protein	P14_v1_560026	ID:109593081 conserved protein of unknown function [Pseudomonas sp. P14]	0	FALSE	43.379	47	9	10	39	9	204	21.9	8.44	119.88	9	0	1.013	0.987	0.704	0.984666	0.956391	0.777992	52.09	12.03	8.87	90.5	89.1	120.4				3.73899e+06	3.68041e+06	4.9763e+06	High	High	High	1
FALSE	High	Master Protein	P14_v1_790006	ID:109593739 DUF5666 domain-containing protein [Pseudomonas sp. P14]	0	FALSE	43.378	48	8	8	157	8	193	20.8	9.09	527.09	8	0	1.115	0.958	0.832	0.89459	0.885064	0.741688	3.09	17.74	11.14	102	91.1	106.9				1.22188e+08	1.09079e+08	1.28056e+08	High	High	High	1
FALSE	High	Master Protein	P14_v1_240056	ID:109591740 rplO| 50S ribosomal subunit protein L15 [Pseudomonas sp. P14]	0	FALSE	43.35	56	8	11	233	8	144	15.2	10.77	697.15	8	0	0.766	1.887	2.349	0.880241	0.787947	0.756853	10.52	37.58	35.6	106.1	133.3	60.7				1.99541e+08	2.50747e+08	1.1412e+08	High	High	High	1
FALSE	High	Master Protein	P14_v1_370028	ID:109592383 rsmI| 16S rRNA 2'-O-ribose C1402 methyltransferase [Pseudomonas sp. P14]	0	FALSE	43.309	51	10	10	35	10	291	31.1	5.69	101.58	10	0	0.882	0.901	1.441	0.939049	0.95788	0.920768	11.09	52.07	37.3	97	113.6	89.3				1.80973e+06	2.11884e+06	1.66609e+06	High	High	High	1
FALSE	High	Master Protein	P14_v1_1000010	ID:109594235 Alpha-L-glutamate ligase family protein [Pseudomonas sp. P14]	0	FALSE	43.304	47	12	14	36	12	326	35.9	6.8	103.2	12	0	0.952	0.853	0.931	0.984666	0.901804	0.94892	18.11	9.73	15.25	97.9	99	103.2				2.69919e+06	2.72901e+06	2.84564e+06	High	High	High	1
FALSE	High	Master Protein	P14_v1_460028	ID:109592731 lptH| Lipopolysaccharide export system protein LptH [Pseudomonas sp. P14]	0	FALSE	43.21	69	10	10	52	10	174	18.7	8.88	159.8	10	0	0.911	1.156	1.474	0.989511	0.978458	0.992192	18.49	46.6	32.25	106.1	120.6	73.2				1.99499e+07	2.26804e+07	1.37668e+07	High	High	High	1
FALSE	High	Master Protein	P14_v1_1000017	ID:109594242 2-methyl-aconitate isomerase [Pseudomonas sp. P14]	0	FALSE	43.063	35	11	12	43	11	400	41.7	5.87	101.71	11	0	1.161	1.218	1.18	0.867424	0.999657	0.989359	21.68	47.92	19.3	107.8	100.8	91.4				8.59364e+06	8.03282e+06	7.28298e+06	High	High	High	1
FALSE	High	Master Protein	P14_v1_440009	ID:109592637 panB| 3-methyl-2-oxobutanoate hydroxymethyltransferase [Pseudomonas sp. P14]	0	FALSE	43.042	42	6	9	41	6	266	27.7	5.92	151.17	6	0	1.162	1.676	1.63	0.865741	0.787916	0.896324	5.47	30.96	40.76	121.3	113	65.7				3.47529e+06	3.23786e+06	1.88237e+06	High	High	High	1	Met-loss [N-Term]
FALSE	High	Master Protein	P14_v1_740016	ID:109593605 hupA| DNA-binding protein HU-alpha [Pseudomonas sp. P14]	0	FALSE	43.021	78	6	10	97	6	93	9.7	9.41	376.39	6	0	1.104	1.777	1.685	0.898103	0.857356	0.959397	10.5	43.48	41.29	111.5	114.2	74.3				1.83741e+07	1.88194e+07	1.22435e+07	High	High	High	1
FALSE	High	Master Protein	P14_v1_230014	ID:109591643 DUF5064 family protein [Pseudomonas sp. P14]	0	FALSE	43.008	79	9	11	95	9	122	14	6.61	266.98	9	0	0.837	1.461	2.015	0.951522	0.975244	0.895703	7.58	10.57	22.54	97.5	132.4	70.1				3.57145e+07	4.84866e+07	2.56889e+07	High	High	High	1
FALSE	High	Master Protein	P14_v1_210006	ID:109591507 histidine kinase [Pseudomonas sp. P14]	0	FALSE	42.951	8	9	9	23	9	1698	186.8	6.81	58.04	9	0	1.134	0.767	0.609	0.947614	0.907146	0.736182	22.93	54.25	43.52	90.2	74.9	134.9				339007	281214	506757	High	High	High	1
FALSE	High	Master Protein	P14_v1_830010	ID:109593852 nadK| NAD kinase [Pseudomonas sp. P14]	0	FALSE	42.858	42	9	9	62	9	296	32.4	6.99	178.97	9	0	0.967	1.116	1.154	0.99807	0.996599	0.999483	14.68	32.37	33.96	102.7	107.6	89.7				4.26104e+06	4.46728e+06	3.72438e+06	High	High	High	1
FALSE	High	Master Protein	P14_v1_90079	ID:109590648 Solute-binding protein family 3/N-terminal domain-containing protein [Pseudomonas sp. P14]	0	FALSE	42.825	41	8	10	25	8	291	33.1	7.55	61.5	8	0	1.124	0.743	0.69	0.950677	0.890393	0.896324	24.33	8.18	29.58	109.3	93.1	97.6				668405	569390	596753	High	High	High	1
FALSE	High	Master Protein	P14_v1_460030	ID:109592733 kdsC| 3-deoxy-D-manno-octulosonate 8-phosphate phosphatase KdsC [Pseudomonas sp. P14]	0	FALSE	42.784	56	9	10	32	9	174	18.8	5.91	96.77	9	0	0.967	0.987	0.96	0.990517	0.969306	0.959397	13.25	19.33	17.22	98.2	94.9	106.9				2.90222e+06	2.80657e+06	3.15914e+06	High	High	High	1
FALSE	High	Master Protein	P14_v1_600021	ID:109593200 Transcriptional regulator, GntR family [Pseudomonas sp. P14]	0	FALSE	42.764	57	11	11	34	11	219	25	7.39	83.6	11	0	0.977	0.975	0.967	0.985193	0.989781	0.976549	5.32	28.79	19.37	82.7	106.6	110.7				1.07373e+06	1.38488e+06	1.43864e+06	High	High	High	1
FALSE	High	Master Protein	P14_v1_240076	ID:109591760 rpsJ| 30S ribosomal subunit protein S10 [Pseudomonas sp. P14]	0	FALSE	42.75	66	9	10	163	9	103	11.7	9.77	410.42	9	0	0.817	1.272	1.629	0.937737	0.999657	0.971401	24.9	16.72	24.77	95.9	126.8	77.3				1.46048e+08	1.93027e+08	1.17625e+08	High	High	High	1
FALSE	High	Master Protein	P14_v1_180025	ID:109591333 lolC| Lipoprotein-releasing system transmembrane protein LolC [Pseudomonas sp. P14]	0	FALSE	42.677	38	11	11	31	11	413	44.2	9.09	82.7	11	0	0.849	1.799	2.33	0.904505	0.594956	0.387649	15.4	37.95	42.5	122.1	133.5	44.4				1.44247e+06	1.57661e+06	524444	High	High	High	1
FALSE	High	Master Protein	P14_v1_1180004	ID:109594482 purE| N(5)-carboxyaminoimidazole ribonucleotide mutase [Pseudomonas sp. P14]	0	FALSE	42.669	69	8	9	66	8	163	16.9	6.37	175.53	8	0	1.013	1.046	1.003	0.984666	0.975244	0.966503	19.65	17.18	27.12	103.7	100	96.3				5.21503e+06	5.02959e+06	4.84617e+06	High	High	High	1	Met-loss [N-Term]
FALSE	High	Master Protein	P14_v1_30171	ID:109589803 yihA| GTP-binding protein YihA [Pseudomonas sp. P14]	0	FALSE	42.648	50	11	11	62	11	210	23.4	9.11	150.82	11	0	0.785	1.601	1.735	0.811758	0.916431	0.896324	44.72	28.76	28.23	107	127.4	65.7				6.88203e+06	8.19257e+06	4.2236e+06	High	High	High	1
FALSE	High	Master Protein	P14_v1_80009	ID:109590472 aceK| Isocitrate dehydrogenase kinase/phosphatase [Pseudomonas sp. P14]	0	FALSE	42.642	18	10	10	27	10	571	66	5.71	64.06	10	0	1.052	0.789	0.656	0.984666	0.890393	0.701546	27.04	36.79	43.47	92.9	82.3	124.8				1.20012e+06	1.06351e+06	1.61168e+06	High	High	High	1
FALSE	High	Master Protein	P14_v1_130065	ID:109591010 purN| phosphoribosylglycinamide formyltransferase 1 [Pseudomonas sp. P14]	0	FALSE	42.557	35	6	8	55	6	217	23.3	6.74	191.79	6	0	0.828	1.034	1.403	0.874695	0.990397	0.949046	24.07	27.77	30.39	99.6	119.9	80.4				2.59783e+06	3.12802e+06	2.09763e+06	High	High	High	1
FALSE	High	Master Protein	P14_v1_1500003	ID:109594719 cytochrome c oxidase cbb3-type subunit II [Pseudomonas sp. P14]	0	FALSE	42.55	55	11	11	50	6	202	22.6	8.68	147.09	11	5	1.996	1.468	0.936	0.00594651	0.960887	0.925174	43.65	40.39	86.82	145.6	83.1	71.4				1.67861e+07	9.58095e+06	8.22932e+06	High	High	High	1
FALSE	High	Master Protein	P14_v1_10328	ID:109589344 Mandelate racemase/muconate lactonizing enzyme family protein [Pseudomonas sp. P14]	0	FALSE	42.5	36	10	11	36	7	387	42.4	5.33	103.63	10	3	0.9	0.954	1.086	0.951522	0.975244	0.999424	10.71	22.46	36.43	89.7	104	106.3				1.78923e+06	2.07386e+06	2.11972e+06	High	High	High	1
FALSE	High	Master Protein	P14_v1_400043	ID:109592508 puuB| gamma-glutamylputrescine oxidase [Pseudomonas sp. P14]	0	FALSE	42.44	33	10	12	39	10	427	46.6	8.13	90.9	10	0	1.344	0.987	0.758	0.457375	0.968756	0.873636	13.45	21.11	33.6	103.2	77.9	118.9				2.73129e+06	2.06176e+06	3.14692e+06	High	High	High	1
FALSE	High	Master Protein	P14_v1_80034	ID:109590497 Uncharacterized ABC transporter ATP-binding protein HI_1051 [Pseudomonas sp. P14]	0	FALSE	42.419	24	10	11	30	10	610	67.7	7.02	71.94	10	0	1.078	0.964	0.843	0.975423	0.979219	0.930691	11.88	41.29	41.41	102.5	92.5	105				1.43605e+06	1.2965e+06	1.47184e+06	High	High	High	1
FALSE	High	Master Protein	P14_v1_330003	ID:109592192 yhdZ| putative ABC transporter ATP-binding subunit YhdZ [Pseudomonas sp. P14]	0	FALSE	42.406	41	10	11	24	8	254	28.9	7.5	69.48	10	1	0.551	0.208	0.441	0.0849153	0.000407369	0.245294	42.61	26.2	30.86	29	81.9	189.1				350096	990378	2.28685e+06	High	High	High	1
FALSE	High	Master Protein	P14_v1_220033	ID:109591597 rluC| 23S rRNA pseudouridine(955/2504/2580) synthase [Pseudomonas sp. P14]	0	FALSE	42.331	42	12	12	55	12	318	35.3	9.79	118.96	12	0	0.943	1.564	1.369	0.984666	0.85692	0.956	29.53	23.64	59.71	115.2	112.5	72.3				2.99229e+06	2.92255e+06	1.87938e+06	High	High	High	1
FALSE	High	Master Protein	P14_v1_30204	ID:109589836 cat| Succinyl-CoA:coenzyme A transferase [Pseudomonas sp. P14]	0	FALSE	42.328	24	9	10	12	9	497	53.9	6.21	34.17	9	0	14.314	62.465		1.64131e-16	1.38203e-16		0	0		296.2	3.5	0.3				2.35517e+06	27498.5	2624.65	High	High	Peak Found	1
FALSE	High	Master Protein	P14_v1_710017	ID:109593528 csdA| cysteine sulfinate desulfinase [Pseudomonas sp. P14]	0	FALSE	42.308	40	10	10	31	10	401	43.3	6.7	102.94	10	0	0.859	1.123	1.469	0.919958	0.989781	0.911741	8.4	29.07	29.09	100.7	124	75.3				803064	988571	600542	High	High	High	1
FALSE	High	Master Protein	P14_v1_90039	ID:109590608 era| 30S ribosomal subunit maturation GTPase Era [Pseudomonas sp. P14]	0	FALSE	42.292	33	10	12	85	10	300	34	6.87	192.54	10	0	0.862	1.11	1.276	0.924574	0.989781	0.986275	18.18	20.1	34.4	95.1	113.7	91.2				4.68888e+06	5.60965e+06	4.50007e+06	High	High	High	1
FALSE	High	Master Protein	P14_v1_580004	ID:109593125 PLP-dependent aminotransferase family protein [Pseudomonas sp. P14]	0	FALSE	42.26	30	11	11	25	11	480	53.7	8.87	69.59	11	0	0.805	0.589	0.65	0.828554	0.558704	0.69562	20.25	29.64	37.51	67.8	90.4	141.9				837858	1.11728e+06	1.75366e+06	High	High	High	1	Met-loss [N-Term]
FALSE	High	Master Protein	P14_v1_50007	ID:109590034 Pyridoxalphosphate dependent aminotransferase, class III [Pseudomonas sp. P14]	0	FALSE	42.236	15	10	11	12	10	956	104.1	5.97	34.7	10	0	0.031	100	100	1.64131e-16	1.38203e-16	1.15948e-16	0			0.7	299.3					1532.88	666694		Peak Found	High	n/a	1
FALSE	High	Master Protein	P14_v1_120072	ID:109590934 protein of unknown function [Pseudomonas sp. P14]	0	FALSE	42.211	32	10	11	29	10	393	44.1	8.16	72.86	10	0	1.199	0.967	0.771	0.895216	0.980679	0.896324	17.94	34.43	42.21	99.8	81.2	119				1.24164e+06	1.0106e+06	1.48126e+06	High	High	High	1
FALSE	High	Master Protein	P14_v1_540015	ID:109593010 alpha,alpha-trehalase [Pseudomonas sp. P14]	0	FALSE	42.185	22	11	11	26	11	598	66.9	6.01	74.27	11	0	1.355	1.083	0.814	0.513535	0.999657	0.906924	41.53	18.66	44.07	120	93.8	86.2				2.31467e+06	1.80957e+06	1.66249e+06	High	High	High	1	Met-loss [N-Term]
FALSE	High	Master Protein	P14_v1_80069	ID:109590532 ydjA| putative NAD(P)H nitroreductase YdjA [Pseudomonas sp. P14]	0	FALSE	42.172	64	10	11	82	10	185	20	6.64	205.63	10	0	1.072	1.337	1.096	0.926439	0.990692	0.933525	16.38	49.14	37.41	110.2	102.2	87.5				1.88797e+07	1.75107e+07	1.49904e+07	High	High	High	1
FALSE	High	Master Protein	P14_v1_10163	ID:109589179 pyrimidine operon attenuation protein / uracil phosphoribosyltransferase [Pseudomonas sp. P14]	0	FALSE	42.145	56	8	10	24	8	190	20.9	6.52	65.78	8	0	0.833	8.814	13.865	0.895216	4.83934e-05	6.90255e-06	31.6	58.02	78.32	133.2	160.6	6.2				1.44344e+06	1.73981e+06	67628.8	High	High	High	1
FALSE	High	Master Protein	P14_v1_180021	ID:109591329 glycerophosphoryl diester phosphodiesterase [Pseudomonas sp. P14]	0	FALSE	42.084	53	11	11	50	11	238	26.2	7.47	123.61	11	0	0.834	1.492	1.681	0.951522	0.948908	0.944637	10.47	17.14	21.55	101.6	125.6	72.8				1.30279e+07	1.61044e+07	9.33042e+06	High	High	High	1
FALSE	High	Master Protein	P14_v1_1050014	ID:109594321 nusG| transcription termination factor NusG [Pseudomonas sp. P14]	0	FALSE	42.076	70	7	9	82	7	159	17.8	5.3	238.19	7	0	0.83	1.131	1.42	0.926014	0.980679	0.986222	13.99	74.8	75.74	89.1	100.8	110.2				9.04929e+06	1.02359e+07	1.11904e+07	High	High	High	1
FALSE	High	Master Protein	P14_v1_390037	ID:109592464 hutH| Histidine ammonia-lyase [Pseudomonas sp. P14]	0	FALSE	42.073	30	11	12	29	11	510	53.7	6.02	82.59	11	0	1.321	2.786	2.874	0.483777	0.13979	0.318887	24.48	52.66	25.55	118.8	100.1	81.1				3.33402e+06	2.8086e+06	2.27705e+06	High	High	High	1
FALSE	High	Master Protein	P14_v1_370018	ID:109592373 rpsI| 30S ribosomal subunit protein S9 [Pseudomonas sp. P14]	0	FALSE	42.069	51	7	12	317	7	130	14.6	11.19	894.25	7	0	0.824	1.402	1.622	0.947107	0.986216	0.971401	16.72	16.15	37.33	104.8	121.4	73.8				1.45179e+08	1.68145e+08	1.02153e+08	High	High	High	1	Met-loss [N-Term]
FALSE	High	Master Protein	P14_v1_140050	ID:109591087 yraR| putative NAD(P)-binding protein YraR [Pseudomonas sp. P14]	0	FALSE	42.018	69	13	13	45	13	214	23.7	7.46	114.49	13	0	0.964	2.912	3.135	0.987661	0.162465	0.327926	23.43	20.98	23.19	121.3	141.6	37.2				1.0297e+07	1.20209e+07	3.15867e+06	High	High	High	1
FALSE	High	Master Protein	P14_v1_40033	ID:109589875 yghU| disulfide reductase/organic hydroperoxide reductase [Pseudomonas sp. P14]	0	FALSE	41.987	44	9	11	76	9	280	31.1	6.32	190.62	9	0	1.141	0.928	0.807	0.864837	0.85692	0.704642	18.8	28.25	31.08	100.4	88.1	111.5				1.50793e+07	1.32328e+07	1.67499e+07	High	High	High	1
FALSE	High	Master Protein	P14_v1_640029	ID:109593339 ftsY| signal recognition particle receptor [Pseudomonas sp. P14]	0	FALSE	41.926	23	13	13	46	13	489	51.1	5.26	123.75	13	0	0.893	1.366	1.64	0.952667	0.964781	0.896324	20.65	47.66	53.7	105.1	114.4	80.5				5.09517e+06	5.54708e+06	3.90083e+06	High	High	High	1
FALSE	High	Master Protein	P14_v1_20073	ID:109589466 rlpA| Endolytic peptidoglycan transglycosylase RlpA [Pseudomonas sp. P14]	0	FALSE	41.921	41	12	12	33	12	333	35.8	9.6	72.43	12	0	1.446	0.656	0.476	0.472614	0.643506	0.343212	19.83	31.18	40.98	89.8	67.6	142.6				1.64748e+06	1.23935e+06	2.61576e+06	High	High	High	1
FALSE	High	Master Protein	P14_v1_260019	ID:109591833 ferric-chelate reductase (NADPH) [Pseudomonas sp. P14]	0	FALSE	41.782	50	13	13	43	13	253	28.3	5.71	103.13	13	0	0.839	1.054	1.085	0.89459	0.98878	0.986275	24.2	31.37	35.92	96.2	108.4	95.4				2.83958e+06	3.20165e+06	2.81683e+06	High	High	High	1
FALSE	High	Master Protein	P14_v1_660028	ID:109593403 rraA| ribonuclease E inhibitor protein A [Pseudomonas sp. P14]	0	FALSE	41.738	63	9	13	92	9	163	17.6	5.17	233.82	9	0	1.128	0.995	0.983	0.880241	0.907703	0.892907	27.62	50.74	49.95	102.5	109	88.5				1.69477e+07	1.80113e+07	1.46246e+07	High	High	High	1
FALSE	High	Master Protein	P14_v1_490033	ID:109592846 dadA| D-amino acid dehydrogenase [Pseudomonas sp. P14]	0	FALSE	41.698	28	10	10	21	10	434	47.4	8.1	59.96	10	0	1	100	100	0.99493	1.38203e-16	1.15948e-16	23.54			173.8	126.2					1.52857e+06	1.10937e+06		High	High	High	1
FALSE	High	Master Protein	P14_v1_1030019	ID:109594292 hemA| glutamyl-tRNA reductase [Pseudomonas sp. P14]	0	FALSE	41.66	28	9	9	25	9	425	46.3	5.71	76.9	9	0	0.843	1.161	1.571	0.898103	0.988427	0.848779	8.71	18.39	29.37	81.6	125.6	92.8				696941	1.07316e+06	792969	High	High	High	1
FALSE	High	Master Protein	P14_v1_960015	ID:109594168 maa| maltose O-acetyltransferase [Pseudomonas sp. P14]	0	FALSE	41.646	40	5	7	22	5	183	19.7	6.4	85.09	5	0	1.127	1.742	1.514	0.947614	0.637898	0.84696	28.33	28.45	42.26	125.2	104.2	70.5				1.55314e+06	1.29304e+06	874833	High	High	High	1
FALSE	High	Master Protein	P14_v1_550022	ID:109593044 fabA| beta-hydroxyacyl-acyl carrier protein dehydratase/isomerase [Pseudomonas sp. P14]	0	FALSE	41.52	55	8	11	81	8	171	18.8	6.54	210.99	8	0	0.921	1.346	1.554	0.994001	0.990397	0.977897	25.22	37.71	18.75	102.2	120.5	77.3				3.7595e+07	4.43321e+07	2.84373e+07	High	High	High	1
FALSE	High	Master Protein	P14_v1_900007	ID:109594014 gshB| glutathione synthetase [Pseudomonas sp. P14]	0	FALSE	41.517	38	12	12	55	12	317	35.3	5.39	157.57	12	0	1.058	1.52	1.289	0.937731	0.948695	0.997122	19.48	12.06	20.63	122.6	113.2	64.2				1.2437e+07	1.14834e+07	6.51038e+06	High	High	High	1
FALSE	High	Master Protein	P14_v1_1020011	ID:109594268 Thioesterase superfamily protein [Pseudomonas sp. P14]	0	FALSE	41.504	56	6	10	68	6	133	14.9	7.34	196.53	6	0	2.353	3.406	1.615	0.000218588	0.0506594	0.8981	16.02	70.74	47.4	175.7	75.6	48.7				1.33654e+07	5.74709e+06	3.70591e+06	High	High	High	1
FALSE	High	Master Protein	P14_v1_260043	ID:109591857 ybaK| Cys-tRNA(Pro) and Cys-tRNA(Cys) deacylase [Pseudomonas sp. P14]	0	FALSE	41.491	53	8	10	27	8	156	16.5	8.65	79.17	8	0	1.062	1.473	1.19	0.95534	0.901804	0.986222	13.09	25.08	36.68	113	109.2	77.7				2.80595e+06	2.71163e+06	1.92919e+06	High	High	High	1
FALSE	High	Master Protein	P14_v1_530027	ID:109592986 Uncharacterized transporter HI_0895 [Pseudomonas sp. P14]	0	FALSE	41.444	13	11	11	38	11	1014	110.3	5.2	85.4	11	0	1.267	0.758	0.639	0.770541	0.848057	0.663805	17.66	35.25	53.23	94.7	75.5	129.8				1.35405e+06	1.07936e+06	1.85523e+06	High	High	High	1
FALSE	High	Master Protein	P14_v1_190011	ID:109591388 murein hydrolase activator [Pseudomonas sp. P14]	0	FALSE	41.437	27	12	12	34	12	438	48.8	9.28	92.63	12	0	1.186	0.845	0.764	0.868379	0.917039	0.881188	29.2	21.84	20.85	108.4	91.2	100.4				2.26003e+06	1.90266e+06	2.09427e+06	High	High	High	1
FALSE	High	Master Protein	P14_v1_180012	ID:109591320 lexA| DNA-binding transcriptional repressor LexA [Pseudomonas sp. P14]	0	FALSE	41.386	57	9	9	28	9	202	22.1	6.7	95.18	9	0	1.112	1.608	1.411	0.919958	0.872073	0.955894	20.86	31.96	47.62	116.6	99.2	84.2				4.01364e+06	3.41325e+06	2.89904e+06	High	High	High	1
FALSE	High	Master Protein	P14_v1_370032	ID:109592387 ftsI| peptidoglycan DD-transpeptidase FtsI [Pseudomonas sp. P14]	0	FALSE	41.373	24	13	13	33	13	580	63.2	9.57	69.89	13	0	1.281	1.694	1.431	0.645075	0.759333	0.896324	36.03	16.92	33.09	137.1	99.5	63.5				2.46161e+06	1.78647e+06	1.14004e+06	High	High	High	1
FALSE	High	Master Protein	P14_v1_90073	ID:109590642 dsbC| Thiol:disulfide interchange protein DsbC [Pseudomonas sp. P14]	0	FALSE	41.352	40	7	8	29	7	247	26.4	7.78	115.36	7	0	0.703	1.257	1.625	0.426795	0.989781	0.899607	22.21	20.88	20.64	104.3	118.2	77.5				5.13975e+06	5.82696e+06	3.81699e+06	High	High	High	1
FALSE	High	Master Protein	P14_v1_770007	ID:109593691 Transcriptional factor-related protein [Pseudomonas sp. P14]	0	FALSE	41.316	49	9	9	37	9	186	20.9	8.76	103.7	9	0	0.732	3.339	4.214	0.539277	0.0400194	0.0813913	21.94	28.07	12.31	114.4	149.6	36				3.53139e+06	4.61813e+06	1.11296e+06	High	High	High	1
FALSE	High	Master Protein	P14_v1_10107	ID:109589123 Acetyltransferase PA5475 [Pseudomonas sp. P14]	0	FALSE	41.305	54	8	8	23	8	182	20.5	7.87	59.18	8	0	1.108	76.748	81.43	0.92833	1.38203e-16	1.15948e-16	22.11	0	0	157.6	141.9	0.4				4.02875e+06	3.62762e+06	10598.9	High	High	Peak Found	1
FALSE	High	Master Protein	P14_v1_1120011	ID:109594414 znuC| Zinc import ATP-binding protein ZnuC [Pseudomonas sp. P14]	0	FALSE	41.283	50	9	9	20	9	248	27	7.05	57.84	9	0	1.074	0.43	0.33	0.979569	0.166978	0.118259	15.5	7.7	16.26	72	59.6	168.4				623097	515275	1.4572e+06	High	High	High	1	Met-loss [N-Term]
FALSE	High	Master Protein	P02538	SWISS-PROT:P02538 Tax_Id=9606 Gene_Symbol=KRT6A Keratin, type II cytoskeletal 6A	0	TRUE	41.27	19	14	14	40	2	564	60	8	75.72	14	2	0.629	1.333	1.563	0.30554	0.952121	0.885242	54.41	68.32	2.52	140.6	100.1	59.3				484262	344564	204226	High	High	High	1
FALSE	High	Master Protein	P14_v1_400033	ID:109592498 rbsA| Ribose import ATP-binding protein RbsA 3 [Pseudomonas sp. P14]	0	FALSE	41.266	29	11	11	16	11	517	55.6	6.76	46.52	11	0	1.328	0.889	0.768	0.73497	0.964781	0.896324	47.07	10.23	27.29	80.6	74	145.4				287081	263689	517671	High	High	High	1	Met-loss [N-Term]
FALSE	High	Master Protein	P14_v1_100027	ID:109590701 hisP| lysine/arginine/ornithine ABC transporter/histidine ABC transporter, ATP binding subunit [Pseudomonas sp. P14]	0	FALSE	41.251	48	9	9	33	8	257	28.4	7.62	97.61	9	1	1.28	0.595	0.614	0.740086	0.525482	0.681322	35.93	66.64	34.83	76.7	83.1	140.2				1.70076e+06	1.84289e+06	3.10958e+06	High	High	High	1	Met-loss [N-Term]
FALSE	High	Master Protein	P14_v1_210025	ID:109591526 aer| Methyl-accepting chemotaxis protein Aer [Pseudomonas sp. P14]	0	FALSE	41.241	22	9	13	33	8	521	55	6.8	94.55	9	0	0.695	2.095	2.568	0.491725	0.611363	0.551785	33.46	10.11	28.53	111	143.9	45.2				611784	793090	248934	High	High	High	1
FALSE	High	Master Protein	P14_v1_1890001	ID:109594793 protein of unknown function [Pseudomonas sp. P14]	0	FALSE	41.222	37	5	9	87	2	283	28.9	4.23	251.12	5	0	1.302	1.397	1.073	0.799698	0.914634	0.995257	4.33	64.41	69.15	98.4	75.6	126				568446	437004	728429	High	High	High	1
FALSE	High	Master Protein	P14_v1_30008	ID:109589640 Membrane protein [Pseudomonas sp. P14]	0	FALSE	41.114	38	8	12	69	8	284	30.6	7.14	177.94	8	0	1.212	1.505	1.307	0.775163	0.941818	0.986222	14.64	25.97	22.72	120.5	100	79.6				8.61308e+06	7.14636e+06	5.68859e+06	High	High	High	1
FALSE	High	Master Protein	P14_v1_430039	ID:109592626 Magnesium transporter MgtE [Pseudomonas sp. P14]	0	FALSE	41.085	31	12	12	31	12	480	53.6	4.73	83.37	12	0	1.073	1.193	1.242	0.976239	0.976459	0.951177	21.5	13.29	51.33	110.5	94.4	95.1				1.12297e+06	959683	967006	High	High	High	1
FALSE	High	Master Protein	P14_v1_60047	ID:109590241 MFS transporter, OFA family, oxalate/formate antiporter [Pseudomonas sp. P14]	0	FALSE	40.992	23	10	11	28	10	467	50.2	8.92	82.29	10	0		0.01	0.01		1.38203e-16	1.15948e-16						300						1.65506e+07	n/a	n/a	High	1
FALSE	High	Master Protein	P14_v1_870001	ID:109593935 livF| branched chain amino acid/phenylalanine ABC transporter ATP binding subunit LivF [Pseudomonas sp. P14]	0	FALSE	40.95	40	8	10	53	8	233	25.5	7.43	147.29	8	0	1.156	0.544	0.485	0.874695	0.268854	0.367729	6.88	23.39	22.56	88.3	76	135.7				3.67501e+06	3.16557e+06	5.65013e+06	High	High	High	1
FALSE	High	Master Protein	P14_v1_240027	ID:109591711 dTDP-4-dehydrorhamnose reductase [Pseudomonas sp. P14]	0	FALSE	40.927	45	10	12	37	10	294	32.7	6.62	83.15	10	0	0.901	0.95	1.085	0.951844	0.952121	0.986275	13.21	30.8	38.4	98.8	102.7	98.5				3.04461e+06	3.16455e+06	3.03461e+06	High	High	High	1
FALSE	High	Master Protein	P14_v1_410029	ID:109592545 uvrC| excision nuclease subunit C [Pseudomonas sp. P14]	0	FALSE	40.876	24	14	15	26	14	607	67.4	8.37	41.23	14	0	0.861	0.716	0.92	0.921647	0.875309	0.97678	38.7	43.5	25.72	110.6	103.8	85.6				778393	730451	602904	High	High	High	1
FALSE	High	Master Protein	P14_v1_680010	ID:109593447 rarA| replication-associated recombination protein A [Pseudomonas sp. P14]	0	FALSE	40.793	31	10	10	27	10	441	49.1	6.19	70.31	10	0	0.881	1.166	1.224	0.93671	0.980679	0.959397	19	54.44	16.96	104.1	112.4	83.4				1.36833e+06	1.47749e+06	1.0964e+06	High	High	High	1
FALSE	High	Master Protein	P14_v1_30131	ID:109589763 Coenzyme F420-dependent N5,N10-methylene tetrahydromethanopterin [Pseudomonas sp. P14]	0	FALSE	40.73	38	8	8	33	8	334	36.8	6.29	114.92	8	0	1.045	1.125	0.901	0.983075	0.992686	0.94892	17.06	41.95	27.72	95.4	93	111.6				2.045e+06	1.9921e+06	2.39222e+06	High	High	High	1
FALSE	High	Master Protein	P14_v1_50144	ID:109590171 ydcL| Uncharacterized lipoprotein YdcL [Pseudomonas sp. P14]	0	FALSE	40.695	58	9	10	57	9	222	23.8	8.63	168.15	9	0	1.358	0.838	0.551	0.448804	0.716846	0.355467	20.97	18.33	29.58	105.9	70.2	123.9				1.28045e+07	8.48261e+06	1.49712e+07	High	High	High	1
FALSE	High	Master Protein	P14_v1_840021	ID:109593883 waaF| ADP-heptose--LPS heptosyltransferase 2 [Pseudomonas sp. P14]	0	FALSE	40.688	36	8	10	32	8	349	38.6	6.54	112.27	8	0	0.911	0.816	0.824	0.95737	0.901804	0.912914	20.18	18.37	8.74	93.7	98.2	108.2				2.23267e+06	2.33992e+06	2.57853e+06	High	High	High	1
FALSE	High	Master Protein	P14_v1_40149	ID:109589991 type VI secretion system protein ImpL [Pseudomonas sp. P14]	0	FALSE	40.685	12	11	11	25	11	1267	138.5	6.64	54.97	11	0	1.617	0.917	0.509	0.289924	0.976559	0.543477	20.97	25.72	24.02	125.9	80.6	93.6				370074	236926	275176	High	High	High	1
FALSE	High	Master Protein	P14_v1_840015	ID:109593877 heptose I phosphotransferase [Pseudomonas sp. P14]	0	FALSE	40.624	23	9	10	37	9	480	53.8	7.3	77.18	9	0	0.934	1.066	1.369	0.979569	0.998139	0.944122	20.99	26.76	23.02	101.6	111	87.4				2.22393e+06	2.42847e+06	1.9135e+06	High	High	High	1
FALSE	High	Master Protein	P14_v1_330002	ID:109592191 serine protease DegS [Pseudomonas sp. P14]	0	FALSE	40.587	29	9	10	39	9	386	41.2	7.61	103.56	9	0	0.949	1.107	1.024	0.984666	0.996599	0.986275	14.04	31.38	12.79	92.9	114.6	92.6				1.52419e+06	1.87967e+06	1.51859e+06	High	High	High	1
FALSE	High	Master Protein	P14_v1_230055	ID:109591684 mltF| Membrane-bound lytic murein transglycosylase F [Pseudomonas sp. P14]	0	FALSE	40.574	26	10	10	33	10	485	55	8.73	84.1	10	0	1.176	0.698	0.683	0.89702	0.716846	0.775827	8.95	27.69	22.37	74.6	91.2	134.2				1.7681e+06	2.16126e+06	3.18211e+06	High	High	High	1
FALSE	High	Master Protein	P14_v1_90101	ID:109590670 cheB| Protein-glutamate methylesterase/protein-glutamine glutaminase of group 3 operon [Pseudomonas sp. P14]	0	FALSE	40.453	35	8	9	22	8	337	35.8	6.81	77.35	8	0	1.138	1.069	0.974	0.939049	0.993216	0.988721	4.57	21.09	4.32	108.7	87.7	103.6				1.17207e+06	946357	1.11739e+06	High	High	High	1
FALSE	High	Master Protein	P14_v1_760029	ID:109593671 conserved protein of unknown function [Pseudomonas sp. P14]	0	FALSE	40.451	48	10	10	55	10	208	23.7	9.14	157.98	10	0	0.897	2.398	2.356	0.984666	0.399735	0.676662	19.99	10.57	23.49	120.3	128.9	50.8				1.38174e+07	1.48004e+07	5.83477e+06	High	High	High	1	Met-loss [N-Term]
FALSE	High	Master Protein	P14_v1_730021	ID:109593582 pstB| phosphate ABC transporter ATP binding subunit [Pseudomonas sp. P14]	0	FALSE	40.314	46	11	11	21	11	277	31.1	6.93	58.61	11	0	1.125	0.724	0.639	0.951522	0.886364	0.852893	2.43	47.46	30.06	92.5	59.4	148.1				457347	293345	732011	High	High	High	1
FALSE	High	Master Protein	P14_v1_840020	ID:109593882 waaC| ADP-heptose:LPS heptosyltransferase 1 [Pseudomonas sp. P14]	0	FALSE	40.311	37	10	11	35	10	352	39.3	9.48	97.01	10	0	0.894	0.781	0.851	0.949397	0.875309	0.929948	10.62	15.75	36.23	87.1	102.1	110.8				2.06803e+06	2.42397e+06	2.63057e+06	High	High	High	1
FALSE	High	Master Protein	P14_v1_310054	ID:109592133 Transporter [Pseudomonas sp. P14]	0	FALSE	40.282	25	8	10	24	8	426	46	4.88	78.73	8	0	1.795	0.887	0.62	0.0123181	0.920286	0.682586	12.32	34.96	18.17	124.5	65	110.5				3.89381e+06	2.03296e+06	3.45617e+06	High	High	High	1
FALSE	High	Master Protein	P14_v1_30147	ID:109589779 protein of unknown function [Pseudomonas sp. P14]	0	FALSE	40.233	63	9	11	23	9	213	23.7	5.06	77.95	9	0	1.308	0.219	0.162	0.791067	0.000670804	0.000455051	14.11	40.85	28.97	51.7	13.4	235				825498	213298	3.75206e+06	High	High	High	1
FALSE	High	Master Protein	P14_v1_130021	ID:109590966 truD| tRNA pseudouridine synthase D [Pseudomonas sp. P14]	0	FALSE	40.212	38	11	11	37	11	352	38.4	7.06	101.38	11	0	0.895	0.987	1.103	0.951522	0.976559	0.993582	8.54	30.38	42.96	95.2	109.9	94.9				2.61994e+06	3.02715e+06	2.613e+06	High	High	High	1
FALSE	High	Master Protein	P14_v1_80096	ID:109590559 argR| HTH-type transcriptional regulator ArgR [Pseudomonas sp. P14]	0	FALSE	40.187	34	10	10	38	10	326	36.3	7.5	77.31	10	0	0.826	0.992	1.33	0.874695	0.990692	0.93347	32.85	36.08	24.67	79.3	122	98.7				995058	1.53148e+06	1.23961e+06	High	High	High	1
FALSE	High	Master Protein	P14_v1_630009	ID:109593290 Histidinol-phosphatase [Pseudomonas sp. P14]	0	FALSE	40.14	51	8	8	34	8	217	24.6	4.89	104.23	8	0	1.005	1	0.933	0.986584	0.980679	0.959397	15.12	25.53	13.56	98.9	96.1	105				2.46157e+06	2.3901e+06	2.61249e+06	High	High	High	1
FALSE	High	Master Protein	P14_v1_780012	ID:109593723 fimbrial chaperone protein [Pseudomonas sp. P14]	0	FALSE	40.137	36	8	9	50	8	258	27.8	9.92	163.47	8	0	1.381	2.069	1.531	0.366911	0.606643	0.96502	14.07	17	22.65	138.5	96.2	65.3				1.93044e+07	1.34044e+07	9.10826e+06	High	High	High	1
FALSE	High	Master Protein	P14_v1_420032	ID:109592582 cytochrome bd ubiquinol oxidase subunit I [Pseudomonas sp. P14]	0	FALSE	40.129	18	10	10	35	9	478	53	8.78	95.82	10	1	1.739	1.155	0.682	0.0417983	0.977723	0.60062	21.48	24.64	61.38	128.1	79.9	92				1.68472e+07	1.04986e+07	1.20938e+07	High	High	High	1
FALSE	High	Master Protein	P14_v1_20214	ID:109589607 Glycosyltransferase [Pseudomonas sp. P14]	0	FALSE	40.105	34	10	11	28	10	363	40.1	9.28	75.43	10	0	0.959	1.276	1.348	0.984666	0.952025	0.922898	18.89	18.86	26.83	105.9	116.1	78				1.47871e+06	1.62153e+06	1.08966e+06	High	High	High	1
FALSE	High	Master Protein	P14_v1_20112	ID:109589505 PepSY domain-containing protein [Pseudomonas sp. P14]	0	FALSE	40.079	27	11	11	23	11	455	50.6	8.85	51.71	11	0	5.706	3.124	0.475	4.98521e-14	0.074559	0.60536	58.8	31.74	41.43	206	30.1	63.9				2.86056e+06	417782	888149	High	High	High	1
FALSE	High	Master Protein	P14_v1_1100007	ID:109594387 Uncharacterized oxidoreductase MT1177 [Pseudomonas sp. P14]	0	FALSE	40.079	39	7	9	28	7	255	26	6.7	89.91	7	0	1.067	0.846	0.77	0.980197	0.931087	0.882953	29.35	38	42.55	85.2	93.7	121.2				1.3739e+06	1.51058e+06	1.95398e+06	High	High	High	1
FALSE	High	Master Protein	P14_v1_60023	ID:109590217 conserved protein of unknown function [Pseudomonas sp. P14]	0	FALSE	40.039	45	12	12	63	12	257	28.6	5.3	163.56	12	0	0.802	0.934	1.226	0.897272	0.883996	0.995257	33.98	21.56	27.78	83.7	109.9	106.4				8.6032e+06	1.13037e+07	1.09362e+07	High	High	High	1
FALSE	High	Master Protein	P14_v1_120050	ID:109590912 histidine kinase [Pseudomonas sp. P14]	0	FALSE	39.957	30	11	11	28	11	483	53.7	6.81	75.02	11	0	1.018	1.074	1.147	0.986584	0.999572	0.985766	10.42	30.96	31.24	105.2	105	89.8				1.70527e+06	1.70086e+06	1.45567e+06	High	High	High	1
FALSE	High	Master Protein	P14_v1_710021	ID:109593532 dapE| succinyl-diaminopimelate desuccinylase [Pseudomonas sp. P14]	0	FALSE	39.602	30	8	8	32	8	383	41.2	5.19	104.02	8	0	0.832	1.559	1.976	0.883182	0.819527	0.661209	15.52	39.47	47.94	106.7	127.4	65.9				2.48323e+06	2.96598e+06	1.53406e+06	High	High	High	1	Met-loss [N-Term]
FALSE	High	Master Protein	P14_v1_270017	ID:109591884 Phosphate-binding protein PstS [Pseudomonas sp. P14]	0	FALSE	39.574	32	8	9	23	8	343	36.5	8.4	76.02	8	0	0.621	0.923	1.544	0.121276	0.967255	0.914402	10.2	16.92	6.05	71.9	137.7	90.4				1.54489e+06	2.9607e+06	1.94424e+06	High	High	High	1
FALSE	High	Master Protein	P14_v1_530026	ID:109592985 membrane fusion protein, multidrug efflux system [Pseudomonas sp. P14]	0	FALSE	39.573	31	11	11	34	11	385	41.3	9.16	80.7	11	0	1.225	0.785	0.588	0.745597	0.787947	0.606897	9.87	25.69	18.06	91.9	79.8	128.3				3.43586e+06	2.98488e+06	4.79938e+06	High	High	High	1
FALSE	High	Master Protein	P14_v1_350014	ID:109592291 4-hydroxy-tetrahydrodipicolinate synthase [Pseudomonas sp. P14]	0	FALSE	39.552	31	7	8	59	7	295	31.4	5.43	186.13	7	0	5.927	55.483	9.355	1.64131e-16	1.38203e-16	0.000399318	2.47	5.26	8.24	250.5	44.2	5.3				4.40462e+07	7.77874e+06	935475	High	High	High	1
FALSE	High	Master Protein	P14_v1_710003	ID:109593514 dxr| 1-deoxy-D-xylulose 5-phosphate reductoisomerase [Pseudomonas sp. P14]	0	FALSE	39.504	26	7	7	26	7	400	42.8	5.73	83.34	7	0	1.113	0.742	0.752	0.951522	0.86907	0.855844	8.05	29.88	32.88	89.6	91.4	119				1.09556e+06	1.11757e+06	1.45572e+06	High	High	High	1
FALSE	High	Master Protein	P14_v1_50028	ID:109590055 Uncharacterized short-chain type dehydrogenase/reductase y4eK [Pseudomonas sp. P14]	0	FALSE	39.457	47	11	11	32	11	251	26.4	5.99	68.55	11	0	0.9	1.34	1.692	0.958078	0.960105	0.896324	19.94	3.91	2.64	121.5	136.5	42				4.69352e+06	5.27558e+06	1.62387e+06	High	High	High	1
FALSE	High	Master Protein	P14_v1_1070016	ID:109594358 Molybdenum cofactor sulfurase [Pseudomonas sp. P14]	0	FALSE	39.414	55	12	14	55	12	267	29.6	5.86	149.61	12	0	0.889	1.049	1.039	0.947614	0.993736	0.996963	36.26	35.23	30.1	95.4	108.4	96.2				1.4863e+06	1.68908e+06	1.49884e+06	High	High	High	1
FALSE	High	Master Protein	P14_v1_10171	ID:109589187 Acetyltransferase PA5475 [Pseudomonas sp. P14]	0	FALSE	39.367	58	8	9	21	8	189	21.2	6.37	60.33	8	0	1.444	100	100	0.239672	1.38203e-16	1.15948e-16	10.6			174.4	125.6					3.0324e+06	2.18386e+06		High	High	n/a	1
FALSE	High	Master Protein	P14_v1_30076	ID:109589708 atpF| ATP synthase Fo complex subunit b [Pseudomonas sp. P14]	0	FALSE	39.328	56	8	11	68	8	156	16.9	5.67	212.46	8	0	1.647	1.89	1.195	0.0769706	0.787916	0.96902	19.57	63.23	62.89	133	86.3	80.8				2.22356e+07	1.44294e+07	1.35077e+07	High	High	High	1
FALSE	High	Master Protein	P14_v1_530008	ID:109592967 nemA| N-ethylmaleimide reductase [Pseudomonas sp. P14]	0	FALSE	39.305	37	9	10	34	9	349	37.8	5.57	96.94	9	0	1.353	1.299	1.007	0.637035	0.956249	0.986275	23.14	25.98	13.47	111.5	94.8	93.7				1.59327e+06	1.35461e+06	1.33983e+06	High	High	High	1
FALSE	High	Master Protein	P14_v1_10255	ID:109589271 colanic acid/amylovoran biosynthesis glycosyltransferase [Pseudomonas sp. P14]	0	FALSE	39.302	28	11	11	31	11	400	44.7	7.83	78.96	11	0	1.167	0.927	0.758	0.905249	0.964781	0.868028	7.32	30.59	35.1	101.5	84.4	114.1				1.85281e+06	1.54095e+06	2.08325e+06	High	High	High	1
FALSE	High	Master Protein	P14_v1_20216	ID:109589609 Glycosyl transferases group 1 [Pseudomonas sp. P14]	0	FALSE	39.261	35	9	9	26	9	318	36.9	8.59	69.29	9	0	0.923	0.877	0.924	0.962705	0.963828	0.975856	16.06	29.02	28.53	93.2	99	107.8				1.11054e+06	1.17907e+06	1.28385e+06	High	High	High	1
FALSE	High	Master Protein	P14_v1_280007	ID:109591924 two-component system, OmpR family, osmolarity sensor histidine kinase EnvZ [Pseudomonas sp. P14]	0	FALSE	39.243	29	9	10	27	9	437	48.7	6.23	82.45	9	0	1.245	0.679	0.545	0.855971	0.740473	0.527469	16.86	45.65	47.29	100.6	54.6	144.8				1.20758e+06	655400	1.73738e+06	High	High	High	1
FALSE	High	Master Protein	P14_v1_320010	ID:109592146 selU| tRNA 2-selenouridine synthase [Pseudomonas sp. P14]	0	FALSE	39.199	32	9	9	27	9	370	41.9	7.24	67.06	9	0	0.983	0.739	0.73	0.989511	0.869599	0.896324	26.42	37.25	33.77	112.7	97.9	89.3				1.1316e+06	982860	896819	High	High	High	1
FALSE	High	Master Protein	P14_v1_70040	ID:109590372 L-sorbose 1-dehydrogenase [Pseudomonas sp. P14]	0	FALSE	39.169	22	9	9	23	5	550	60.4	8.66	68.03	9	3	1.059	0.645	0.615	0.984345	0.63701	0.648879	15.58	22.99	29	83.1	87.4	129.4				1.23853e+06	1.30262e+06	1.92835e+06	High	High	High	1
FALSE	High	Master Protein	P14_v1_70112	ID:109590444 putative transcriptional regulator [Pseudomonas sp. P14]	0	FALSE	39.166	70	7	8	58	7	121	13.6	9.17	187.63	7	0	0.985	1.005	1.031	0.980603	0.916431	0.906924	11.87	21.37	30.76	100.4	108.3	91.3				1.90858e+07	2.05882e+07	1.73533e+07	High	High	High	1
FALSE	High	Master Protein	P14_v1_870002	ID:109593936 livG| branched chain amino acid/phenylalanine ABC transporter ATP binding subunit LivG [Pseudomonas sp. P14]	0	FALSE	39.138	42	10	11	32	10	255	28.3	8.41	89.87	10	0	1.391	0.538	0.338	0.368232	0.301954	0.100962	18.8	29.97	48.58	85.6	69.4	145				2.50812e+06	2.03298e+06	4.24713e+06	High	High	High	1	Met-loss [N-Term]
FALSE	High	Master Protein	P14_v1_1000001	ID:109594226 oprI| Major outer membrane lipoprotein [Pseudomonas sp. P14]	0	FALSE	39.128	54	7	10	143	7	83	8.8	8.16	407.46	7	0	0.999	1.676	1.677	0.973118	0.905442	0.959397	19.77	34.05	28.73	116.4	120.7	62.9				2.73498e+08	2.83694e+08	1.47864e+08	High	High	High	1
FALSE	High	Master Protein	P14_v1_830017	ID:109593859 metZ| O-succinylhomoserine sulfhydrylase [Pseudomonas sp. P14]	0	FALSE	39.118	26	8	9	18	8	403	44.5	7.24	57.52	8	0	1.041	0.9	0.846	0.984666	0.976559	0.966831	22.56	30.45	14.35	99.3	86.7	114				630841	550512	724165	High	High	High	1
FALSE	High	Master Protein	P14_v1_1200001	ID:109594504 protein of unknown function [Pseudomonas sp. P14]	0	FALSE	39.111	32	5	10	75	5	185	20.5	9.91	255.22	5	0	0.903	1.795	1.963	0.985193	0.848265	0.896324	9.39	41.5	42.91	109.3	128.1	62.6				3.93669e+07	4.61351e+07	2.25467e+07	High	High	High	1
FALSE	High	Master Protein	P14_v1_160070	ID:109591240 GntR family transcriptional regulator, trigonelline degradation regulator [Pseudomonas sp. P14]	0	FALSE	39.096	40	11	11	41	11	250	28.2	6.95	116.47	11	0	0.823	1.256	1.499	0.883489	0.990397	0.94892	21.47	22.37	48.96	100.2	122.8	76.9				5.31186e+06	6.51165e+06	4.07797e+06	High	High	High	1
FALSE	High	Master Protein	P14_v1_1580002	ID:109594747 glycine betaine/proline transport system substrate-binding protein [Pseudomonas sp. P14]	0	FALSE	39.091	41	9	9	30	9	286	31.1	9.04	89.92	9	0	0.651	0.185	0.296	0.246425	3.92565e-05	0.0554245	6.46	22.49	24.62	40.4	63.5	196				932680	1.46563e+06	4.52233e+06	High	High	High	1
FALSE	High	Master Protein	P14_v1_280002	ID:109591919 hslO| 33 kDa chaperonin [Pseudomonas sp. P14]	0	FALSE	39.067	51	11	11	38	11	299	33.5	4.79	98.31	11	0	0.863	0.696	0.813	0.923639	0.661943	0.896324	17.86	5.52	21.28	84.4	96.9	118.7				2.54402e+06	2.92073e+06	3.57539e+06	High	High	High	1	Met-loss [N-Term]
FALSE	High	Master Protein	P14_v1_320011	ID:109592147 selD| selenide, water dikinase [Pseudomonas sp. P14]	0	FALSE	39.066	31	9	9	54	9	344	36.2	5.66	162.38	9	0	1.009	1.094	1.072	0.984463	0.976459	0.971401	18.81	18.01	15.61	101	100.9	98				8.19581e+06	8.18793e+06	7.95435e+06	High	High	High	1
FALSE	High	Master Protein	P14_v1_10005	ID:109589021 hydroxylysine kinase [Pseudomonas sp. P14]	0	FALSE	39.05	18	12	12	31	12	1015	110.8	6.24	55.94	12	0	1.12	1.052	1.011	0.947614	0.998139	0.999424	27.76	12.29	27.49	115.8	78.2	105.9				1.45866e+06	984945	1.33397e+06	High	High	High	1	Met-loss [N-Term]
FALSE	High	Master Protein	P14_v1_30174	ID:109589806 dsbA| Thiol:disulfide interchange protein DsbA [Pseudomonas sp. P14]	0	FALSE	39.016	37	6	8	47	6	210	23.1	7.11	165.01	6	0	1.108	3.203	2.891	0.915667	0.0573574	0.35291	17.18	25.43	8.6	133.6	118.5	47.9				4.50485e+06	3.9937e+06	1.61345e+06	High	High	High	1
FALSE	High	Master Protein	P14_v1_490021	ID:109592834 rpmB| 50S ribosomal subunit protein L28 [Pseudomonas sp. P14]	0	FALSE	39.01	64	9	12	113	9	78	8.9	11.78	275.57	9	0	0.643	1.333	2.027	0.444997	0.990744	0.890657	30.23	16.29	48.6	89.6	146.6	63.7				9.43401e+07	1.54286e+08	6.70782e+07	High	High	High	1
FALSE	High	Master Protein	P14_v1_480029	ID:109592810 truB| tRNA pseudouridine(55) synthase [Pseudomonas sp. P14]	0	FALSE	38.985	41	10	10	29	10	305	33.4	6.18	84.59	10	0	0.835	1.003	1.11	0.894017	0.989781	0.999424	9.71	48.99	39.46	102.8	116.7	80.6				1.87188e+06	2.12532e+06	1.46773e+06	High	High	High	1
FALSE	High	Master Protein	P14_v1_530032	ID:109592991 irlR| Transcriptional activator protein IrlR [Pseudomonas sp. P14]	0	FALSE	38.968	50	9	9	46	9	227	25.5	6.24	111.72	9	0	1.174	1.018	0.847	0.898103	0.989781	0.93347	43.07	27.71	68.11	103.5	91.4	105.1				2.0315e+06	1.79313e+06	2.06336e+06	High	High	High	1
FALSE	High	Master Protein	P14_v1_110017	ID:109590784 thiO| Glycine oxidase [Pseudomonas sp. P14]	0	FALSE	38.948	30	9	9	28	9	365	38.6	5.39	86.48	9	0	0.826	1.816	2.349	0.886449	0.581124	0.301078	22.32	1.69	20.43	103.6	141.7	54.7				1.57669e+06	2.15576e+06	833077	High	High	High	1
FALSE	High	Master Protein	P14_v1_320048	ID:109592184 yafV| 2-oxoglutaramate amidase [Pseudomonas sp. P14]	0	FALSE	38.946	40	9	9	67	9	263	29.7	6.54	216.26	9	0	0.704	2.212	2.972	0.635731	0.50295	0.346135	13.71	29.86	31.01	103.1	152.6	44.3				8.94387e+06	1.32441e+07	3.84615e+06	High	High	High	1
FALSE	High	Master Protein	P14_v1_100089	ID:109590763 msrA| methionine sulfoxide reductase A [Pseudomonas sp. P14]	0	FALSE	38.942	51	9	11	55	9	222	24.5	5.01	99.43	9	0	0.906	1.269	1.66	0.964243	0.989781	0.917699	23	30.71	11.49	110.7	119.2	70.1				6.2237e+06	6.69878e+06	3.94236e+06	High	High	High	1
FALSE	High	Master Protein	P14_v1_300021	ID:109592047 cheZ| Protein phosphatase CheZ [Pseudomonas sp. P14]	0	FALSE	38.933	42	10	10	36	10	262	29.5	5.2	100.13	10	0	0.784	0.629	0.829	0.785342	0.590352	0.912663	11.75	18.02	21.11	76.3	98	125.6				1.57604e+06	2.02343e+06	2.59369e+06	High	High	High	1
FALSE	High	Master Protein	P14_v1_40047	ID:109589889 DNA-binding protein H-NS [Pseudomonas sp. P14]	0	FALSE	38.882	54	9	10	95	8	121	13.8	9.17	289.67	9	2	1.182	0.929	0.718	0.785065	0.857356	0.577778	23.64	28.54	30.99	103.5	97.4	99.1				4.38739e+07	4.1291e+07	4.20312e+07	High	High	High	1
FALSE	High	Master Protein	P14_v1_10252	ID:109589268 putative colanic acid biosysnthesis UDP-glucose lipid carrier transferase [Pseudomonas sp. P14]	0	FALSE	38.865	26	10	10	27	10	473	53.3	8.68	72.01	10	0	1.422	0.902	0.761	0.454452	0.952121	0.879164	16.09	33.33	42.44	107.2	77.8	114.9				2.00522e+06	1.45575e+06	2.14961e+06	High	High	High	1
FALSE	High	Master Protein	P14_v1_300053	ID:109592079 Uncharacterized oxidoreductase PA3106 [Pseudomonas sp. P14]	0	FALSE	38.859	38	8	9	32	8	257	27.2	6.64	87.07	8	0	0.884	0.839	1.017	0.939049	0.915815	0.98109	11.14	19.99	17.95	99.4	107.8	92.8				2.29853e+06	2.49217e+06	2.14648e+06	High	High	High	1
FALSE	High	Master Protein	P14_v1_880004	ID:109593960 cytochrome bd ubiquinol oxidase subunit I [Pseudomonas sp. P14]	0	FALSE	38.854	19	6	7	25	5	468	51.8	7.5	77.77	6	0	1.978	0.7	0.323	0.0333355	0.812416	0.150936	50.54	14.86	31.84	91	55.6	153.3				709577	433612	1.19534e+06	High	High	High	1
FALSE	High	Master Protein	P14_v1_590029	ID:109593178 rfbA| dTDP-glucose pyrophosphorylase [Pseudomonas sp. P14]	0	FALSE	38.829	34	9	10	71	9	293	32.5	6.02	183.34	9	0	1.046	0.964	0.908	0.947614	0.890393	0.83428	16.57	17.45	15.49	102.3	95.5	102.2				1.49896e+07	1.39833e+07	1.49726e+07	High	High	High	1
FALSE	High	Master Protein	P14_v1_40050	ID:109589892 COGs COG3558 [Pseudomonas sp. P14]	0	FALSE	38.797	66	9	10	47	9	158	19	6.14	102.38	9	0	1.298	2.304	1.859	0.662843	0.307425	0.590635	17.57	16.87	30.85	126.7	117.7	55.6				2.10179e+06	1.95242e+06	921902	High	High	High	1	Met-loss [N-Term]
FALSE	High	Master Protein	P14_v1_1120016	ID:109594419 putative iron-regulated membrane protein [Pseudomonas sp. P14]	0	FALSE	38.791	24	8	8	28	8	397	44.1	8.87	85.61	8	0	1.557	0.789	0.417	0.287036	0.875309	0.199975	14.16	29.4	12.01	108.6	53.9	137.5				1.91746e+06	951326	2.42854e+06	High	High	High	1
FALSE	High	Master Protein	P14_v1_790018	ID:109593751 5-dehydro-4-deoxyglucarate dehydratase [Pseudomonas sp. P14]	0	FALSE	38.727	45	9	10	19	9	303	32.6	5.71	61.22	9	0	0.193	0.58	3.984	2.08969e-12	0.606643	0.0120512	42.1	11.47	18.52	16.7	235.1	48.2				168792	2.37424e+06	486578	High	High	High	1
FALSE	High	Master Protein	P14_v1_1330005	ID:109594622 protein of unknown function [Pseudomonas sp. P14]	0	FALSE	38.713	28	10	10	29	10	429	49.3	7.43	71.35	10	0	1.056	1.084	0.981	0.984666	0.994565	0.986275	25.54	21.78	54.07	107.9	98.5	93.6				970031	885249	840737	High	High	High	1
FALSE	High	Master Protein	P14_v1_800006	ID:109593767 fatty-acyl-CoA synthase [Pseudomonas sp. P14]	0	FALSE	38.662	28	9	10	18	9	540	59.5	6.3	62.76	9	0	2.835	3.328	1.193	8.70216e-05	0.07009	0.97678	27.89	9.37	20.34	203.2	51.5	45.3				1.41841e+06	359370	316538	High	High	High	1	Met-loss [N-Term]
FALSE	High	Master Protein	P14_v1_960010	ID:109594163 cysA| sulfate/thiosulfate ABC transporter ATP binding subunit [Pseudomonas sp. P14]	0	FALSE	38.641	39	9	9	34	9	329	36.9	6.38	74.34	9	0	0.577	1.117	2.254	0.0424226	0.990397	0.475643	22.78	12.3	37.68	80.1	163.4	56.5				1.535e+06	3.12946e+06	1.08272e+06	High	High	High	1
FALSE	High	Master Protein	P14_v1_1070008	ID:109594350 moaB| protein MoaB [Pseudomonas sp. P14]	0	FALSE	38.64	46	7	9	43	7	179	19.1	6.32	142.43	7	0	0.853	1.119	1.378	0.908552	0.994565	0.926846	31.81	24.69	38.48	106.4	110.7	82.9				1.86125e+06	1.93572e+06	1.44887e+06	High	High	High	1
FALSE	High	Master Protein	P14_v1_140062	ID:109591099 ppa| inorganic pyrophosphatase [Pseudomonas sp. P14]	0	FALSE	38.636	58	8	10	64	8	175	19.2	5	197.18	8	0	1.674	0.918	0.554	0.0442389	0.880444	0.514364	9.02	29.15	23.48	123.1	70.9	106				9.00403e+06	5.19128e+06	7.75678e+06	High	High	High	1
FALSE	High	Master Protein	P14_v1_140016	ID:109591053 fadI| 3-ketoacyl-CoA thiolase [Pseudomonas sp. P14]	0	FALSE	38.627	31	10	10	30	10	425	45.5	8.19	95.18	10	0	1.175	0.661	0.507	0.87226	0.57905	0.428583	24.89	25.56	24.53	89.9	74.6	135.4				2.43776e+06	2.02369e+06	3.67215e+06	High	High	High	1
FALSE	High	Master Protein	P14_v1_240059	ID:109591743 rplR| 50S ribosomal subunit protein L18 [Pseudomonas sp. P14]	0	FALSE	38.585	52	7	8	143	7	116	12.6	10.18	413.96	7	0	0.786	1.462	1.822	0.901736	0.975244	0.93347	12.88	28.17	21.73	109.3	125.6	65.2				1.95948e+08	2.25139e+08	1.1685e+08	High	High	High	1
FALSE	High	Master Protein	P14_v1_300019	ID:109592045 fliA| RNA polymerase sigma factor FliA [Pseudomonas sp. P14]	0	FALSE	38.582	54	11	11	34	11	246	27.6	5.44	88.43	11	0	0.992	1.073	1.07	0.990517	0.992686	0.986275	14.25	23.83	27.7	103	103.8	93.2				2.71157e+06	2.73087e+06	2.45169e+06	High	High	High	1
[truncated: 2,325 more rows]
